# Supplementary material for: Disentangling the shared genetics of ADHD, cannabis use disorder and cannabis use and prediction of cannabis use disorder in ADHD
Source: bioRxiv or medRxiv preprint supplement (doi:10.1101/2024.02.22.24303124), 2024-02-24

# ADHDxCU GWAS

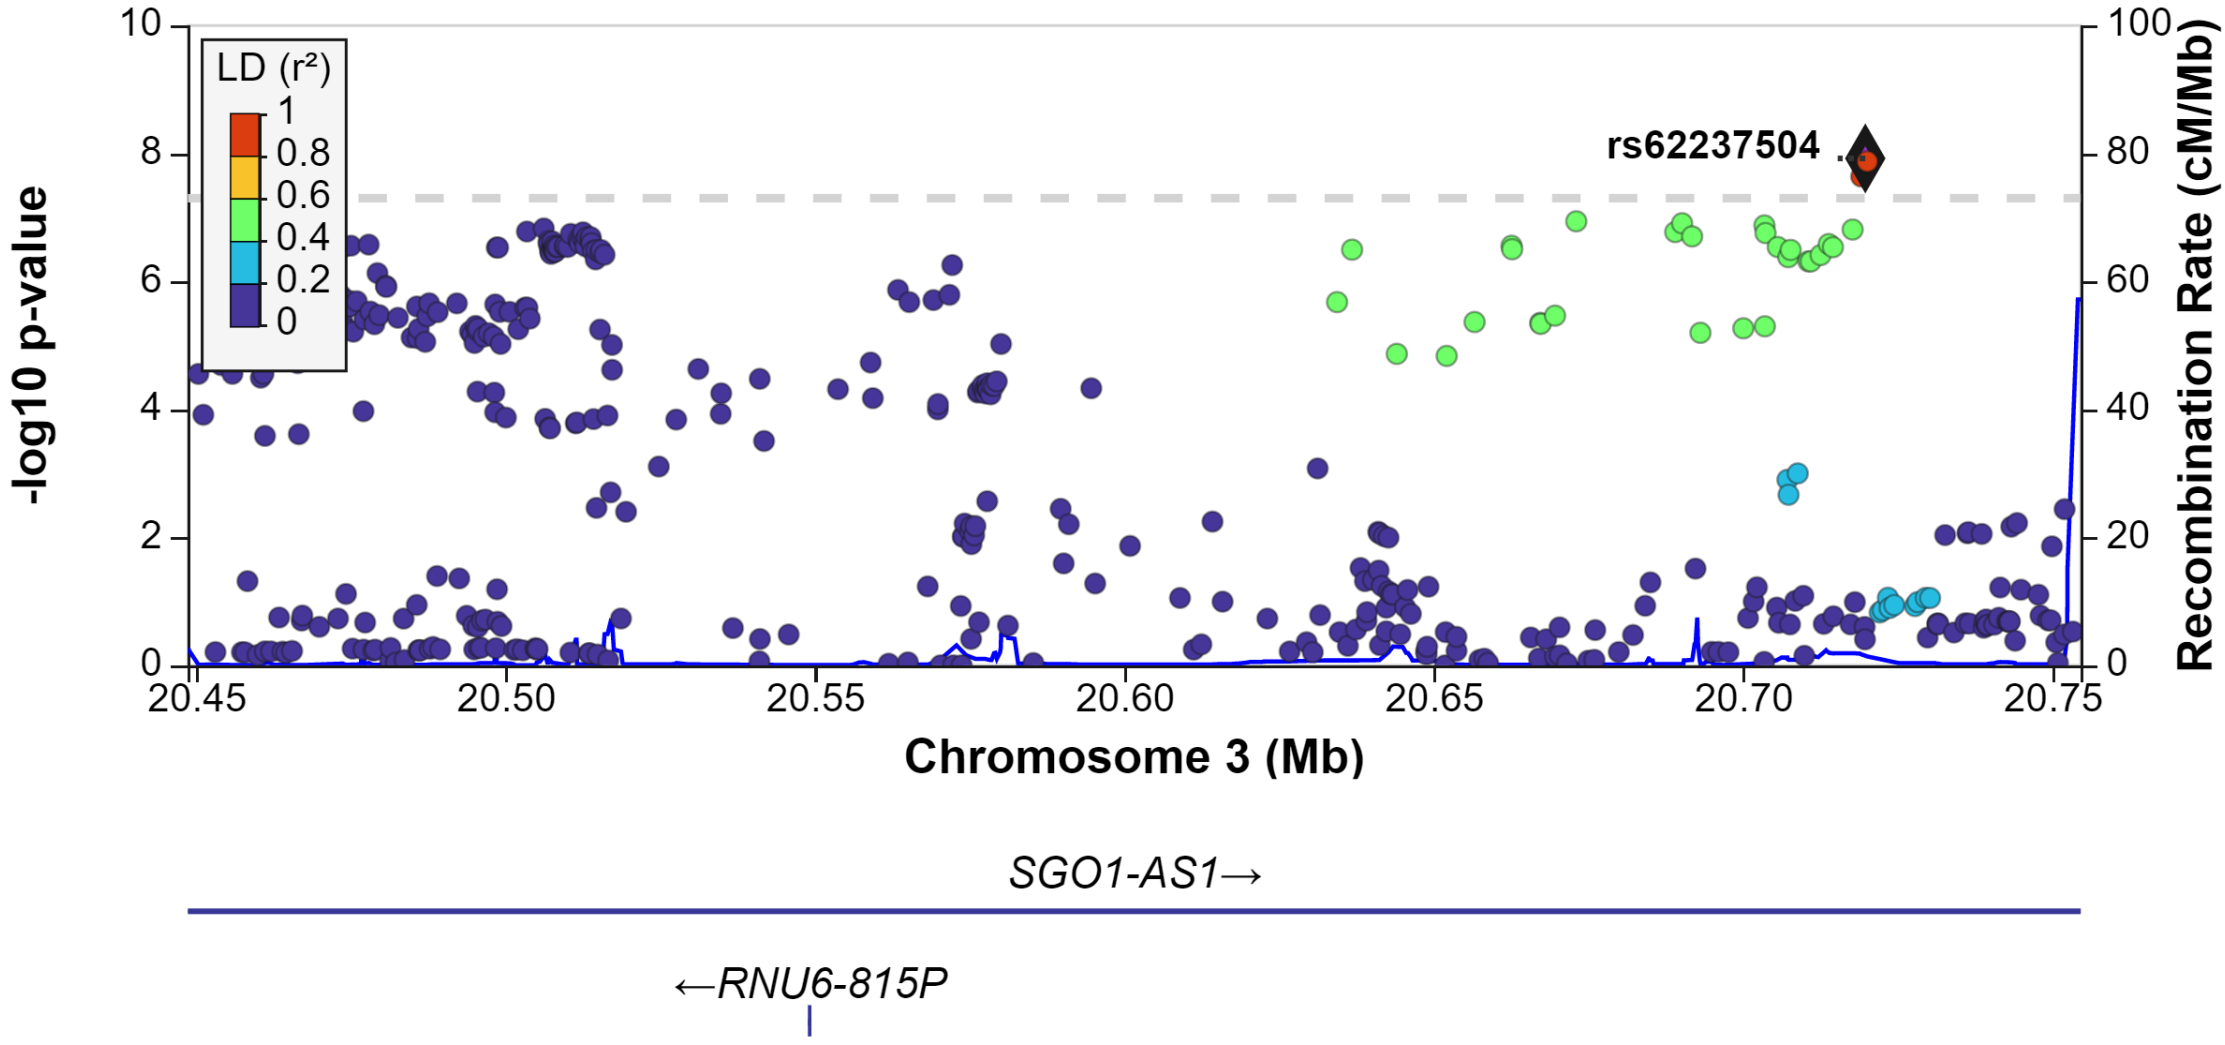

# ADHDxCU GWAS

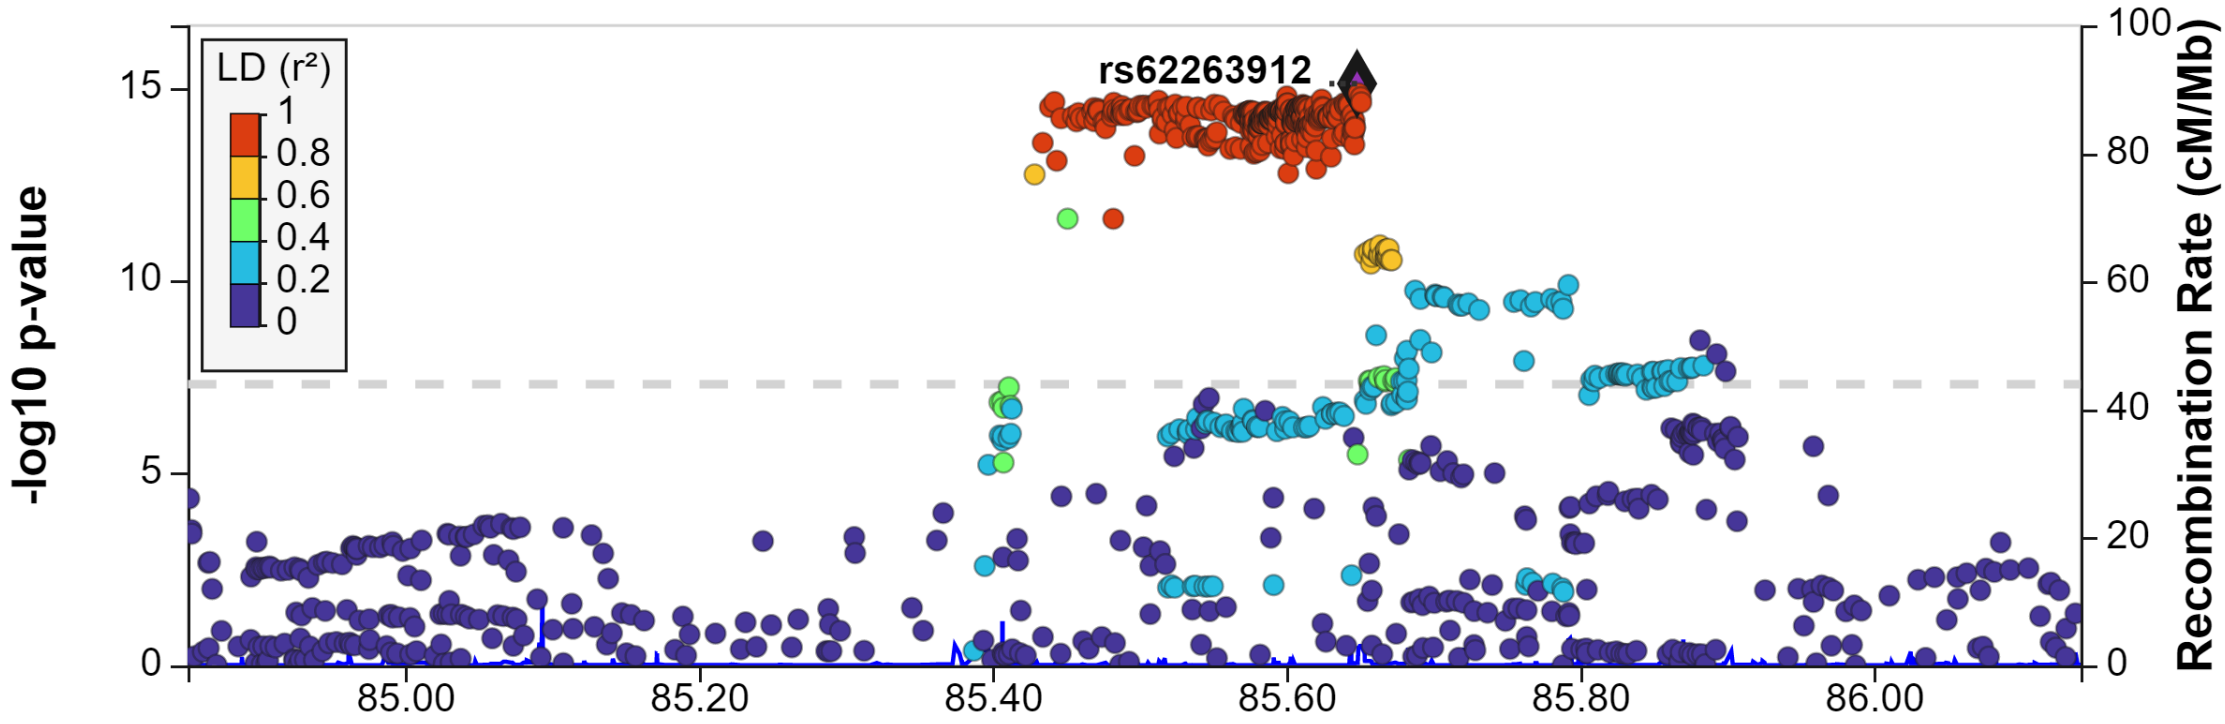

← *LINC00971*

*MIR5688* →

← *CADM2-AS2*

*LINC02025* →

← *CADM2-AS1*

*AC132660.1* →

*THAP12P2* →

*AC132660.2* →

*CADM2* →

# ADHDxCU GWAS

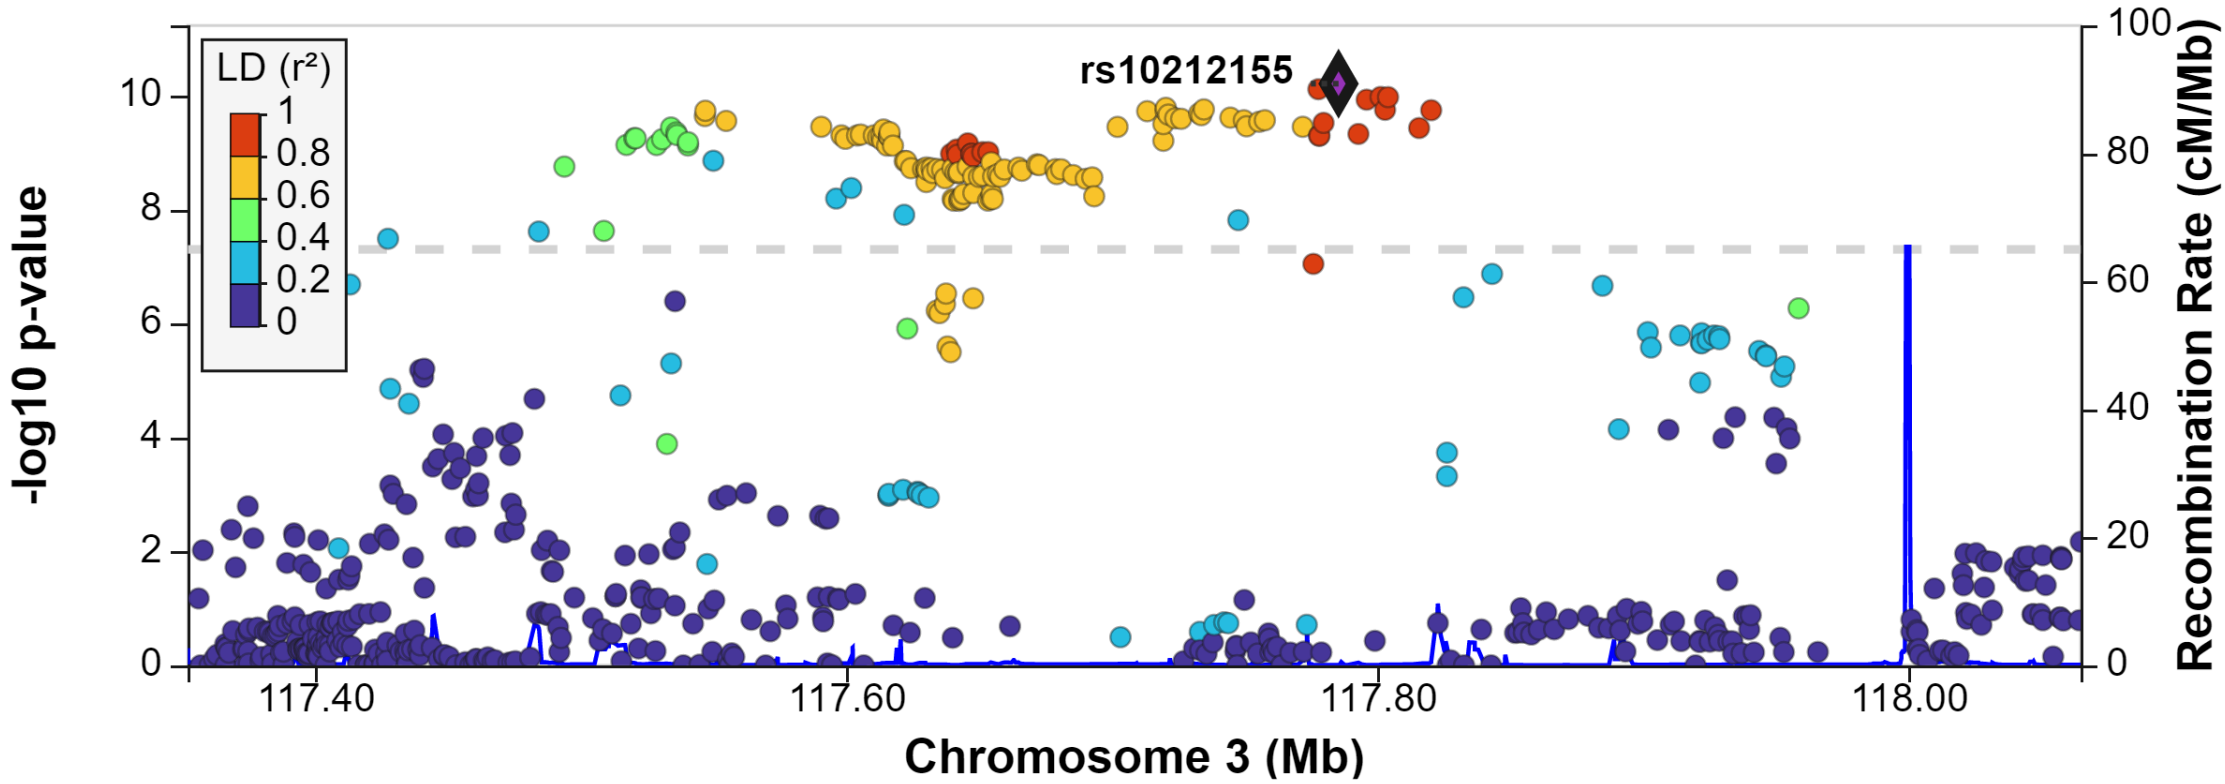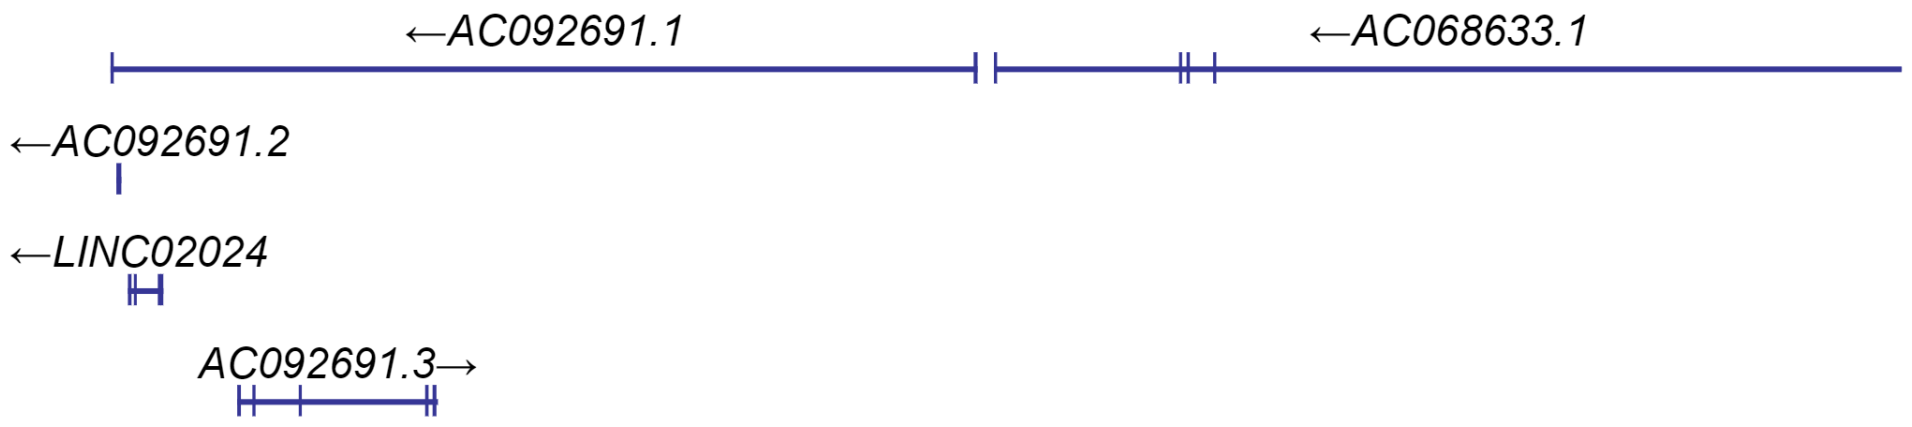

# ADHDxCU GWAS

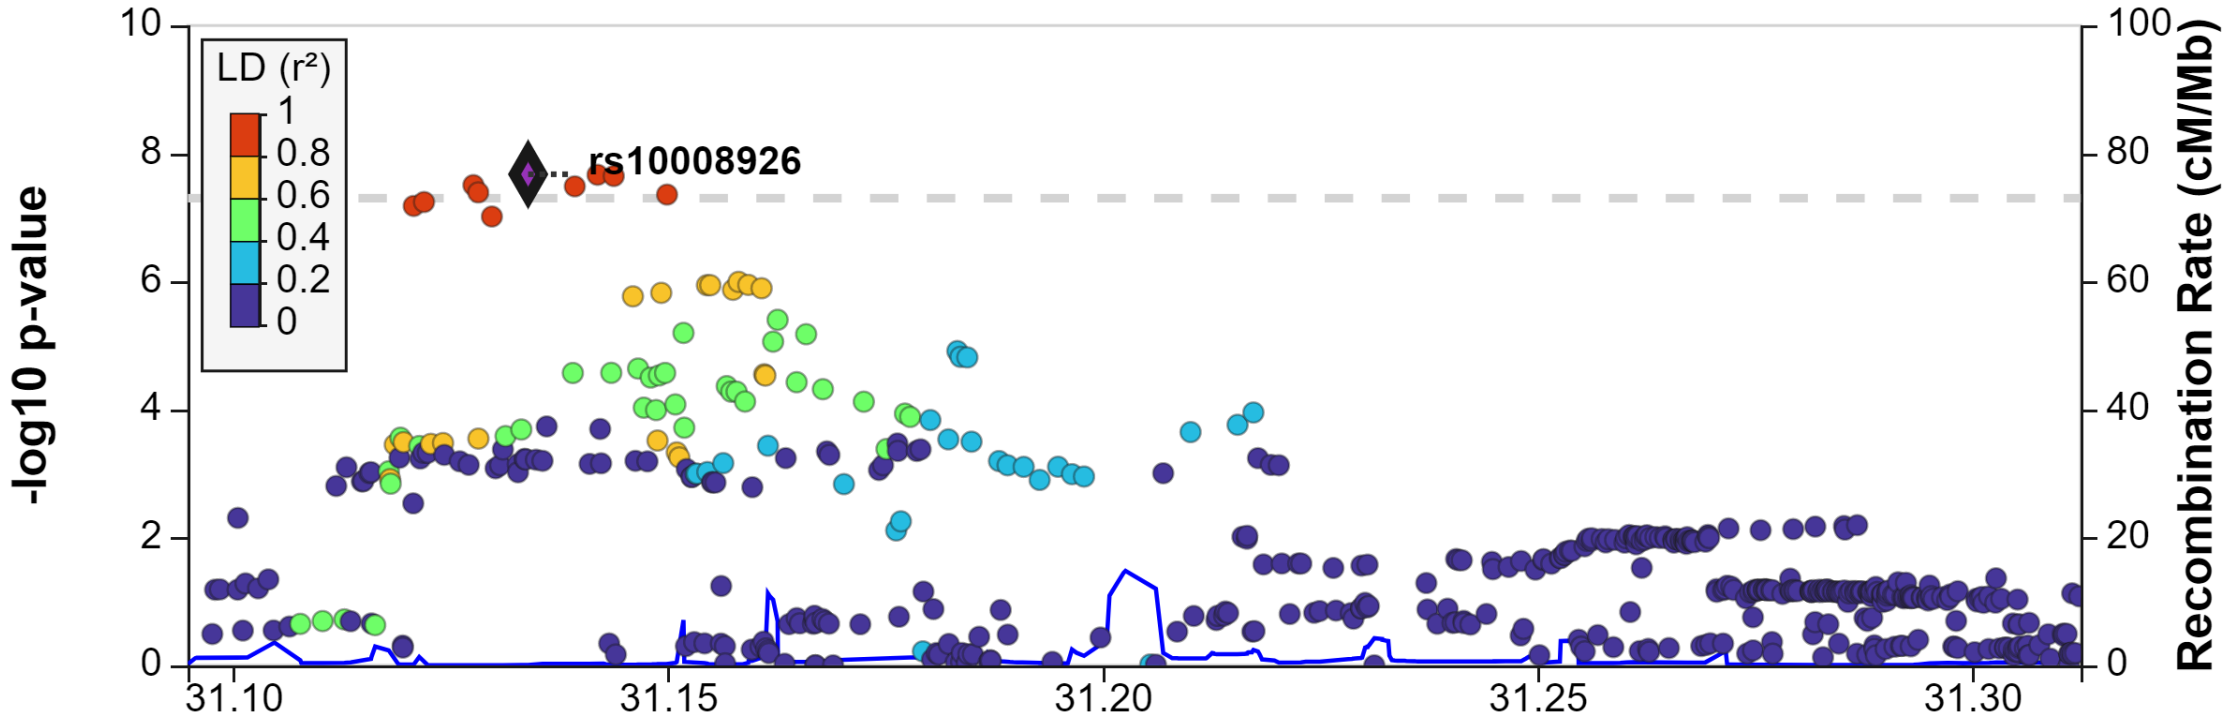

# ADHDxCU GWAS

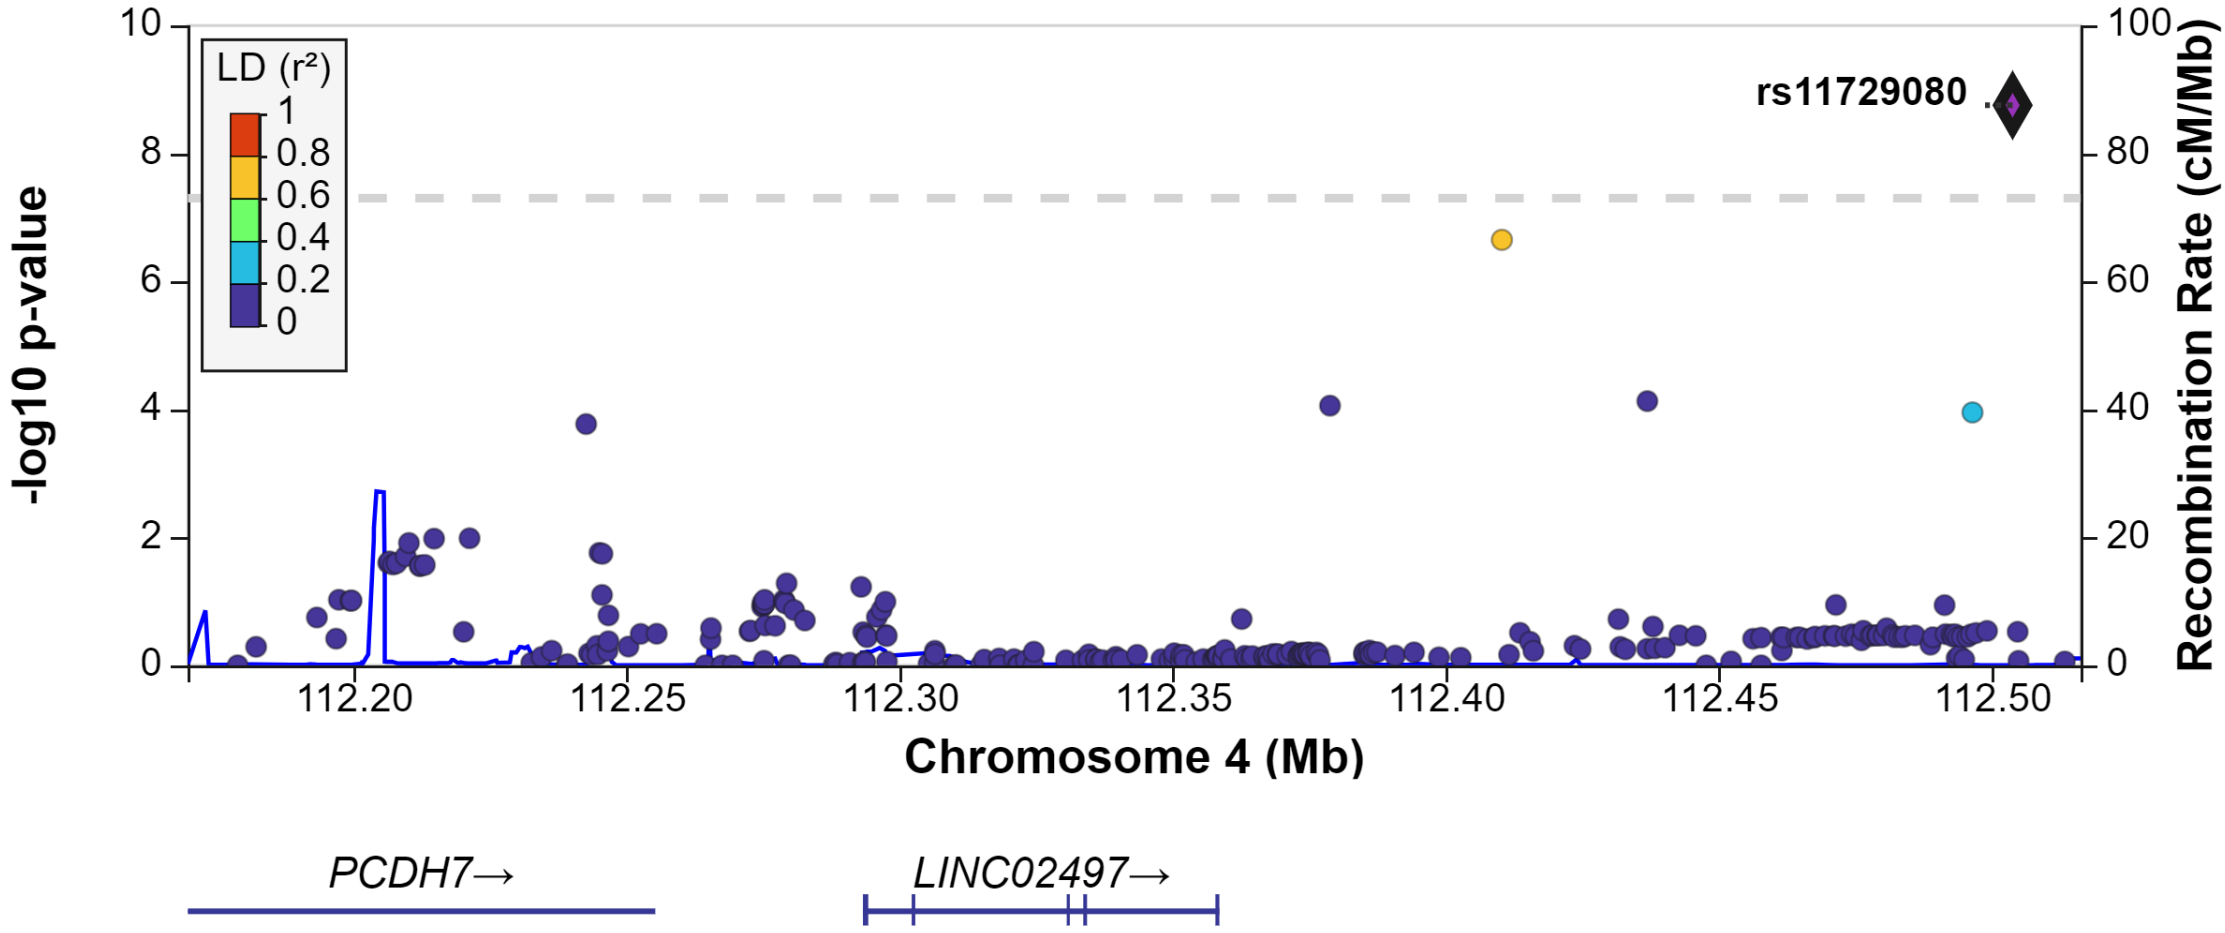

# ADHDxCU GWAS

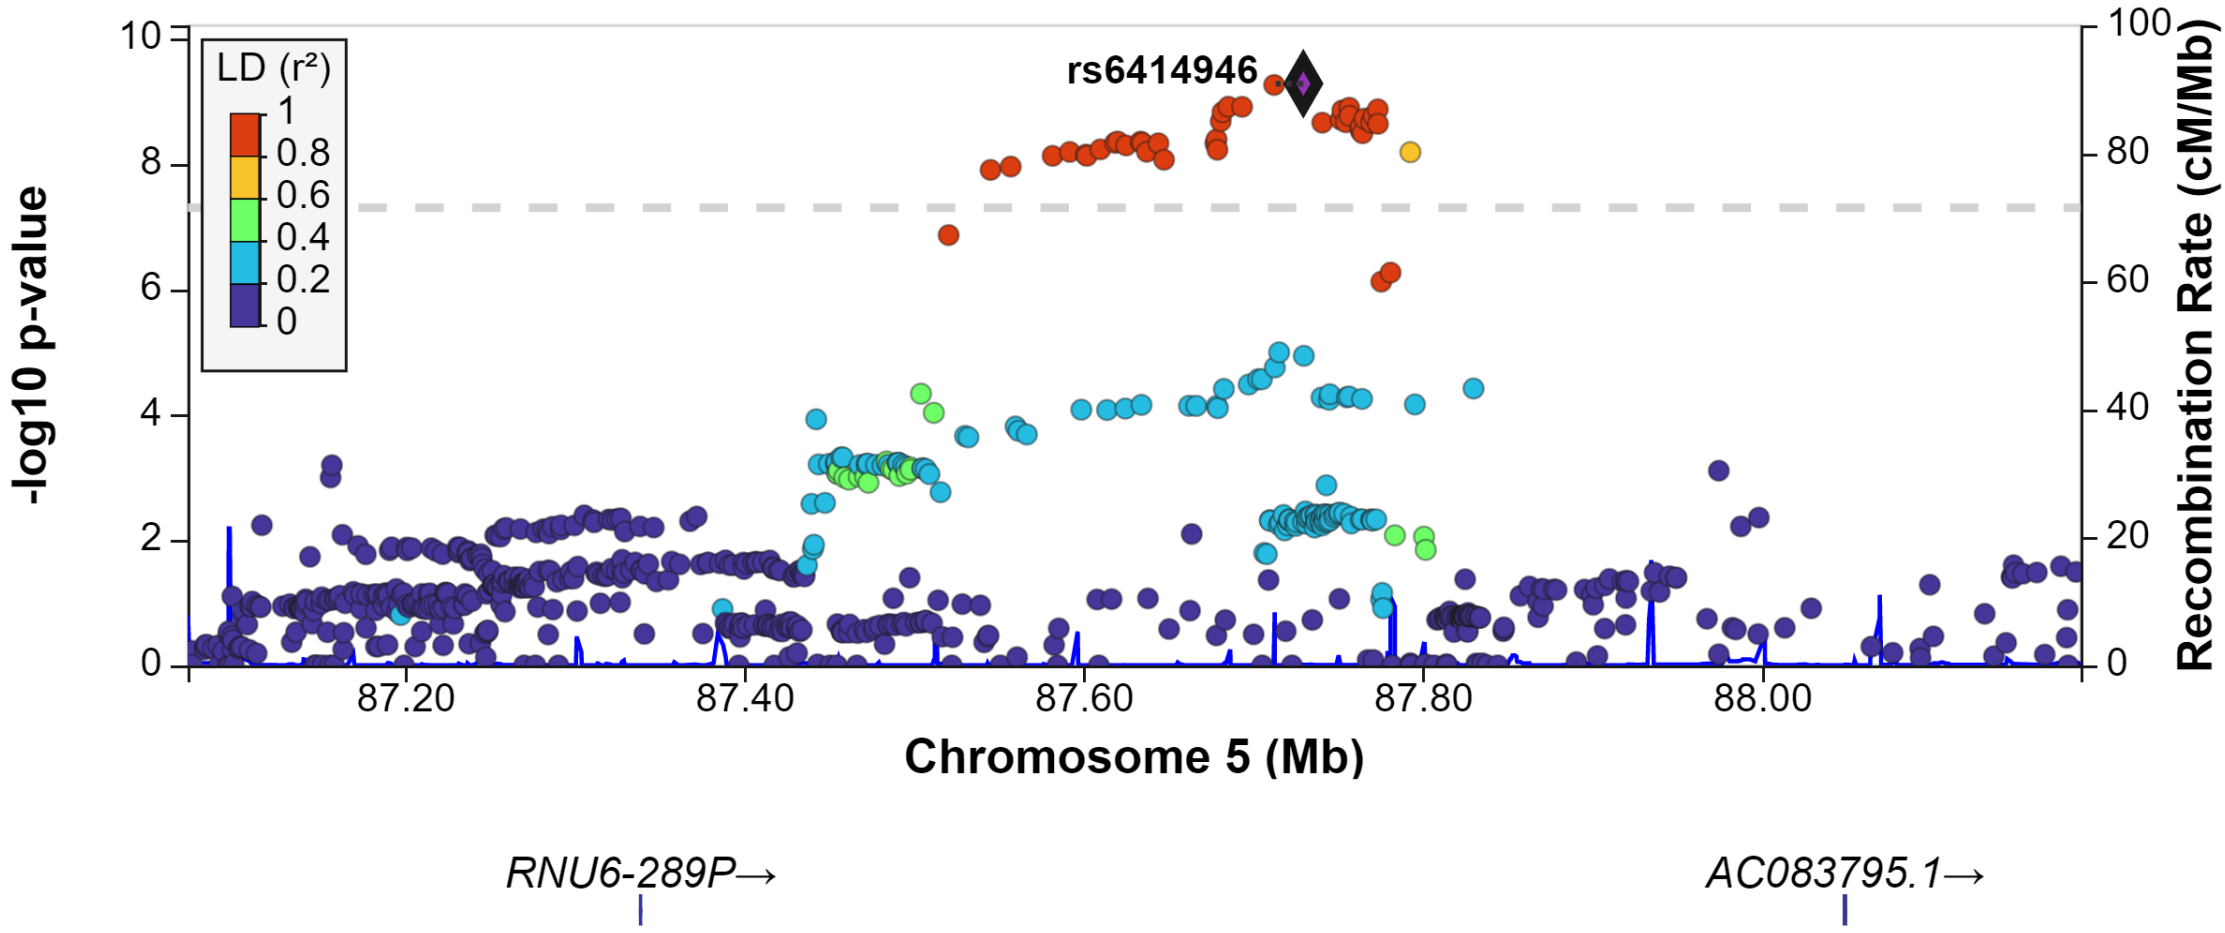

# ADHDxCU GWAS

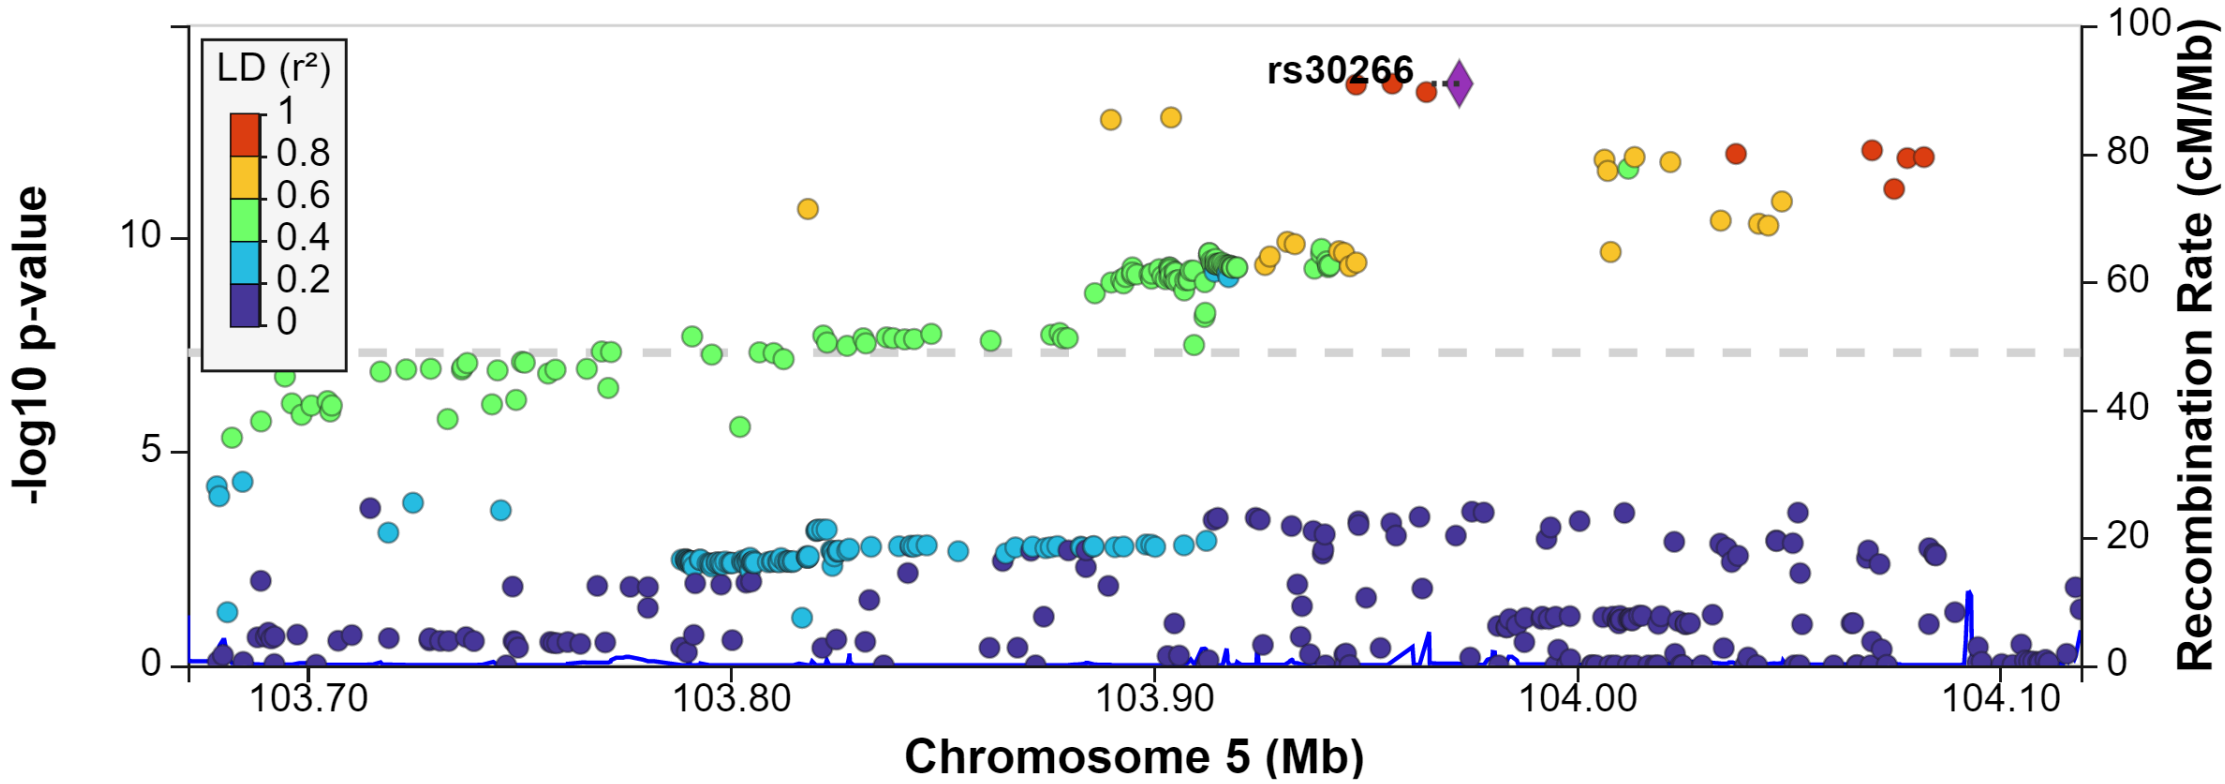

*LINC02163*→

*AC099520.2*→

←*AC099520.1*

*AC091931.1*→

←*RNU6-334P*

# ADHDxCU GWAS

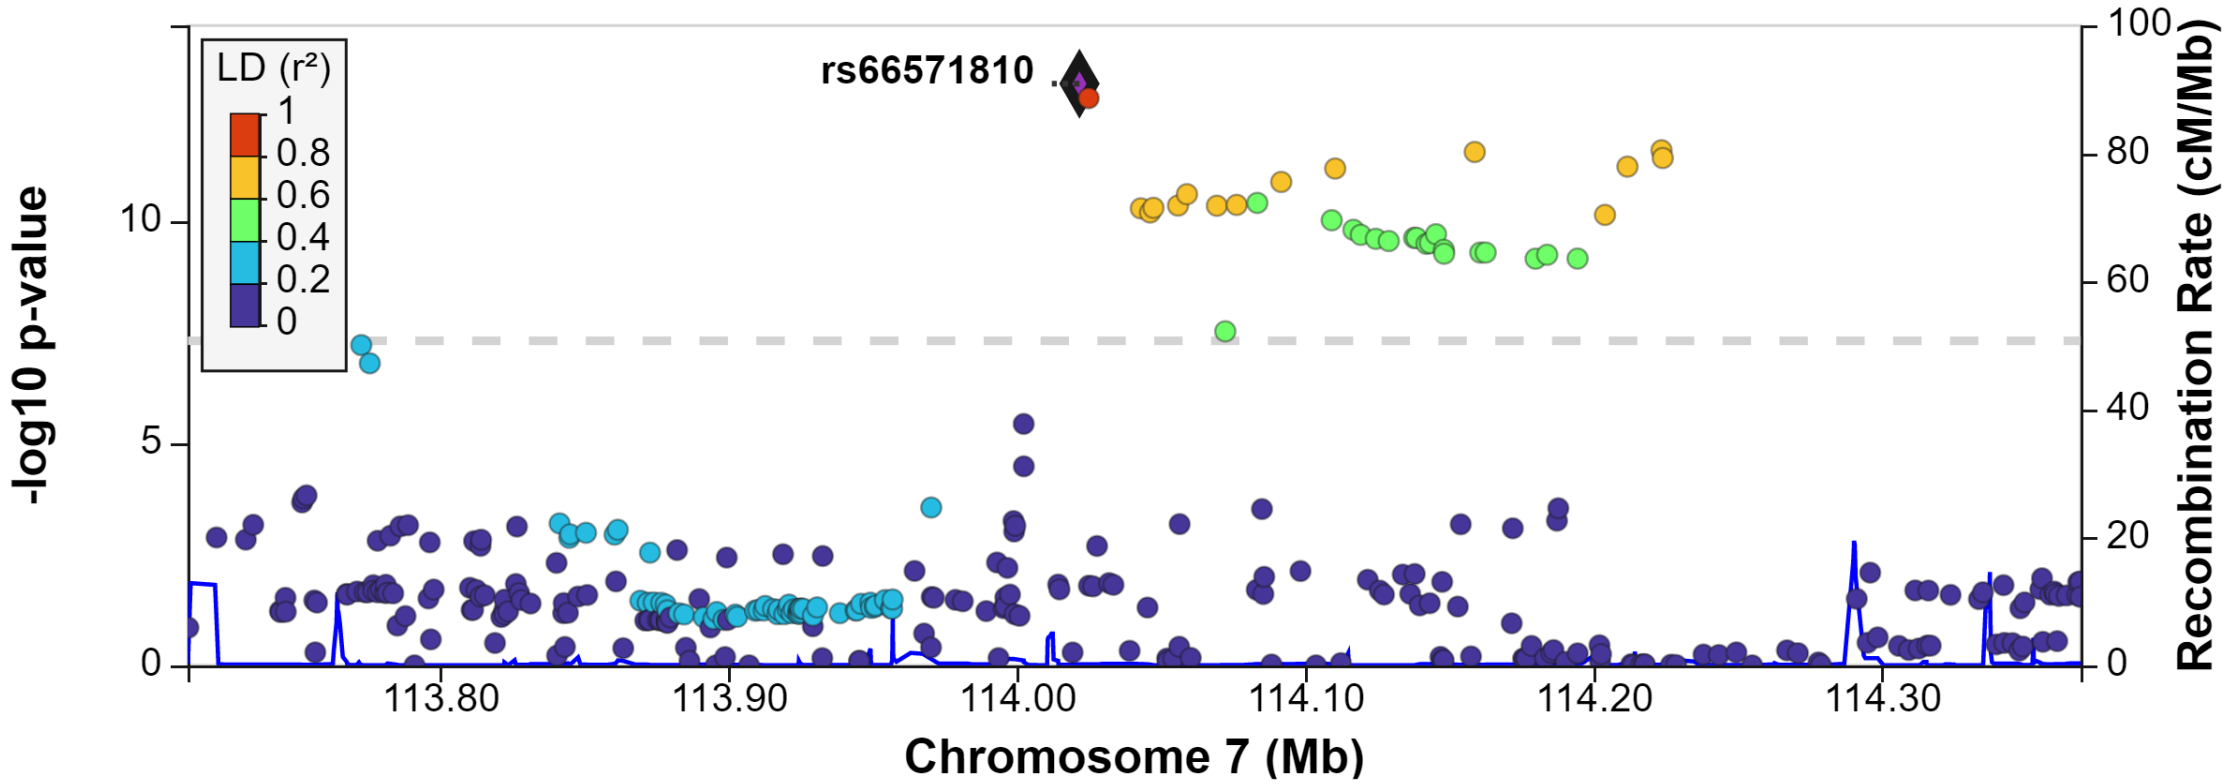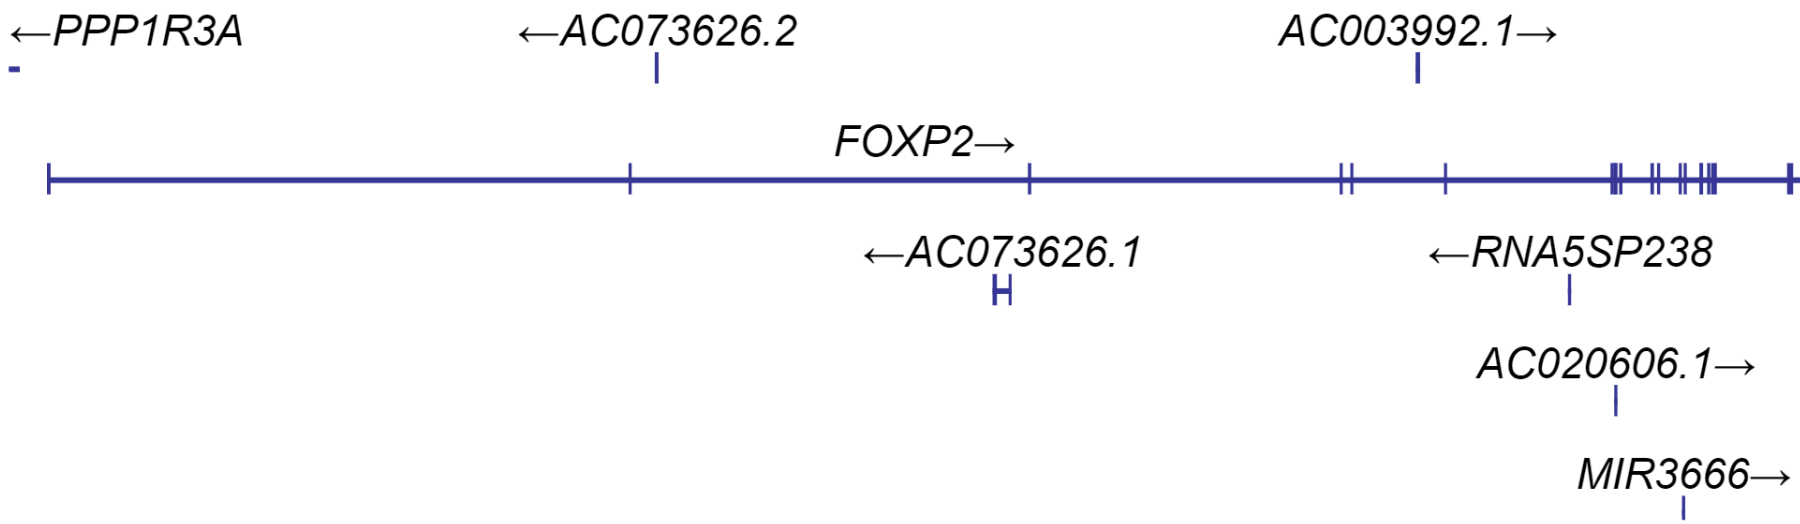



# ADHDxCU GWAS

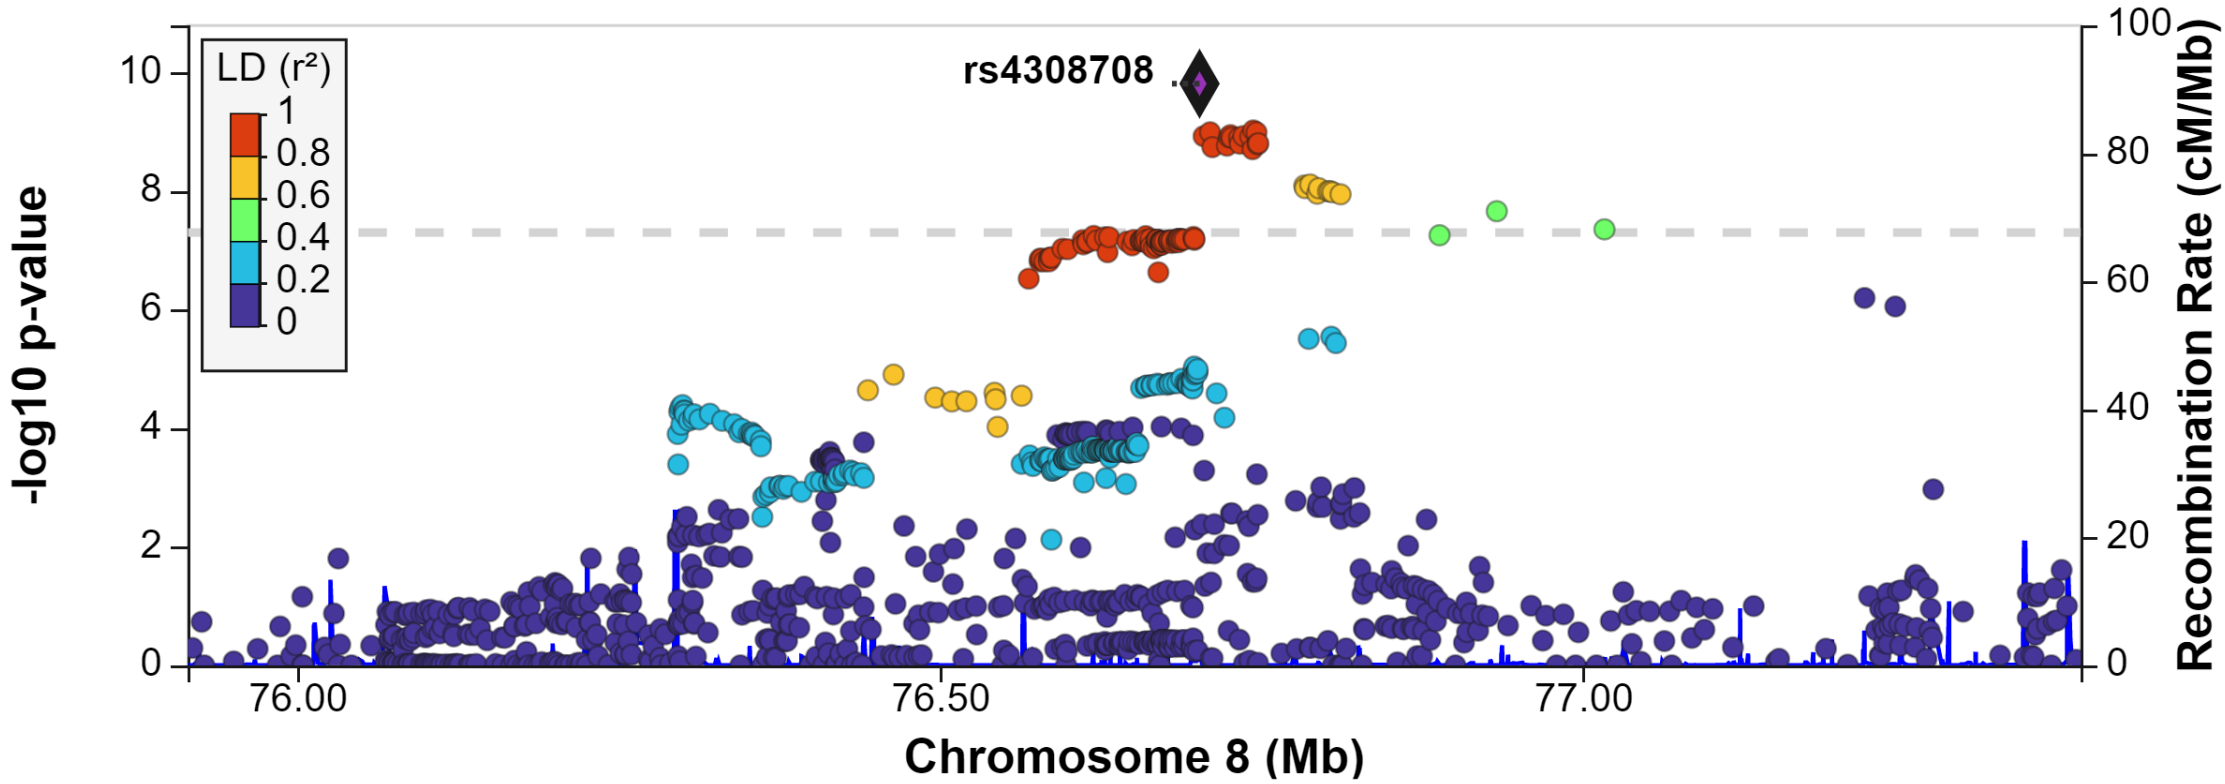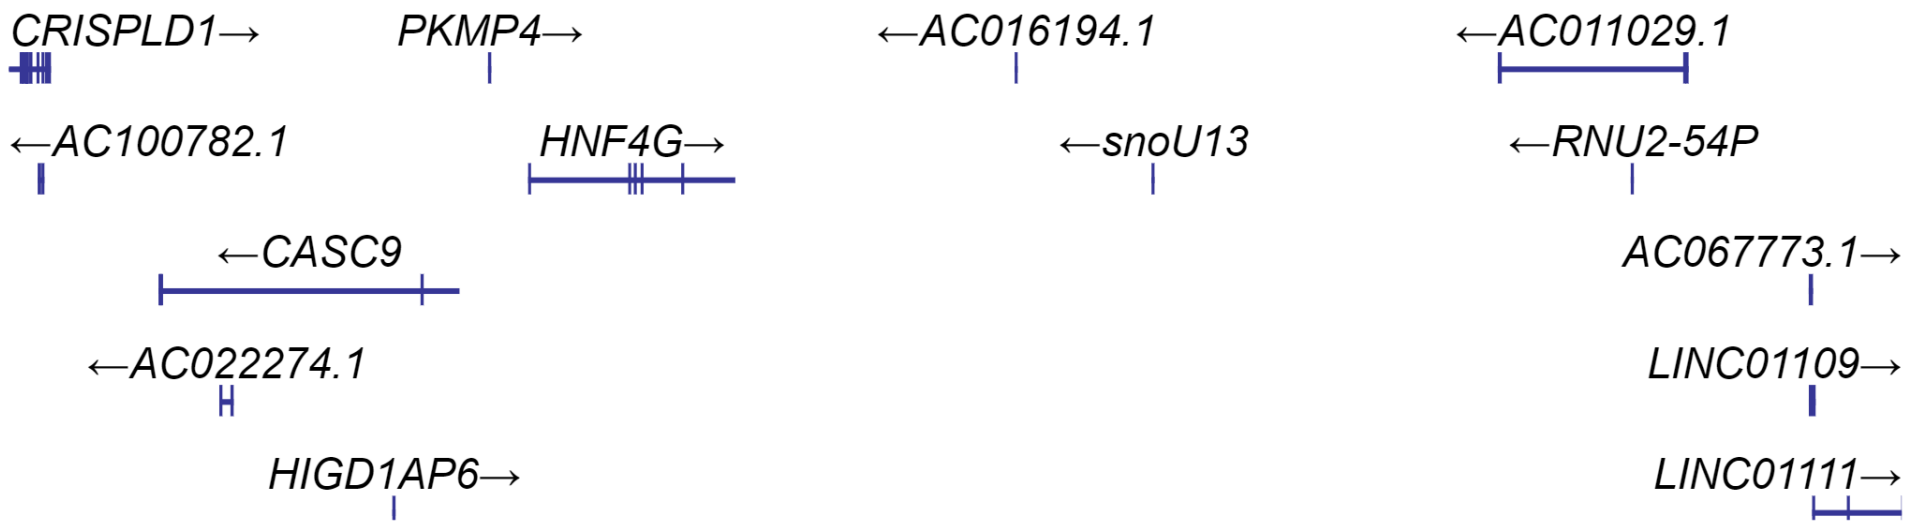

# ADHDxCU GWAS

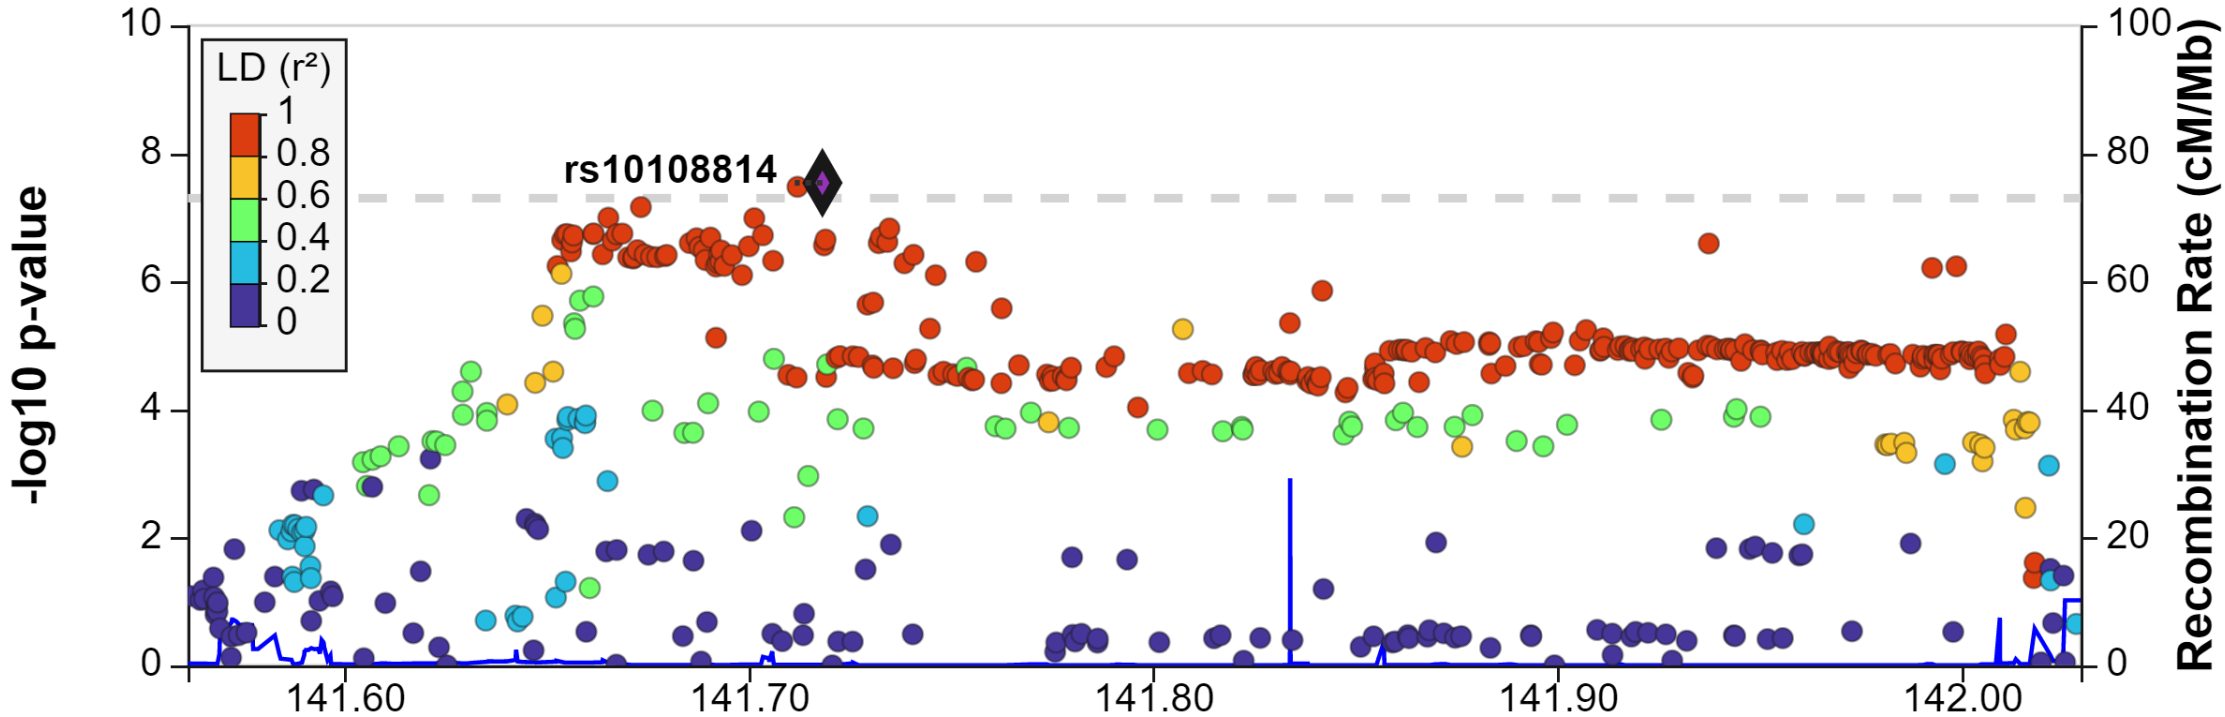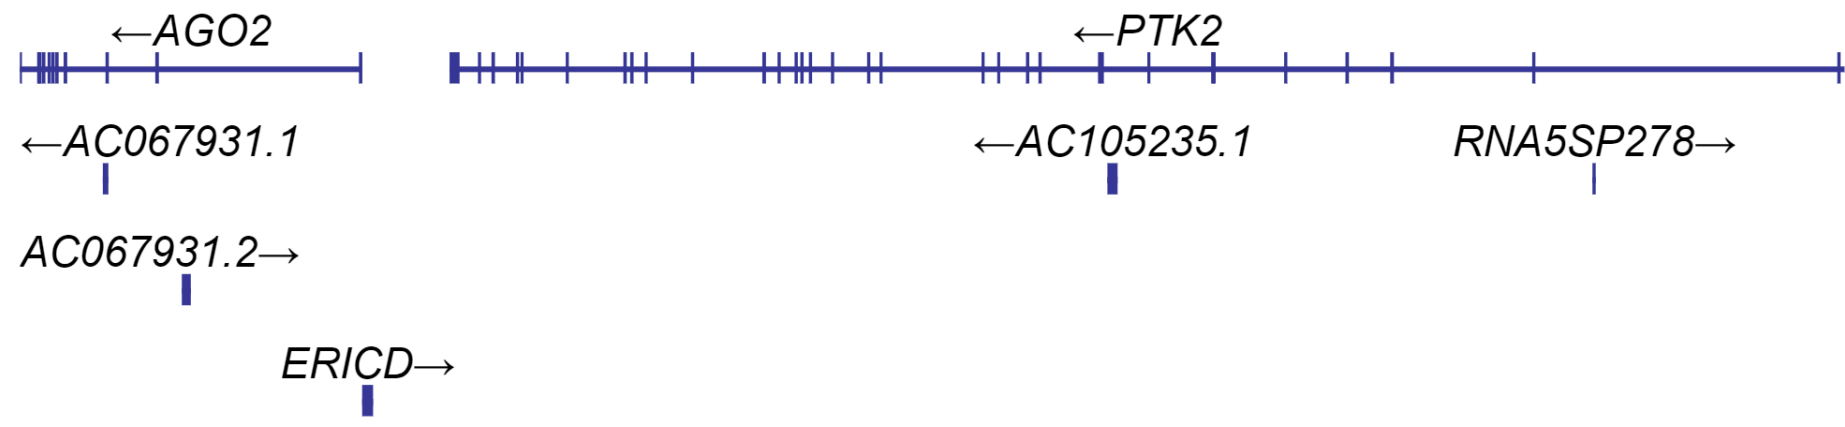

# ADHDxCU GWAS

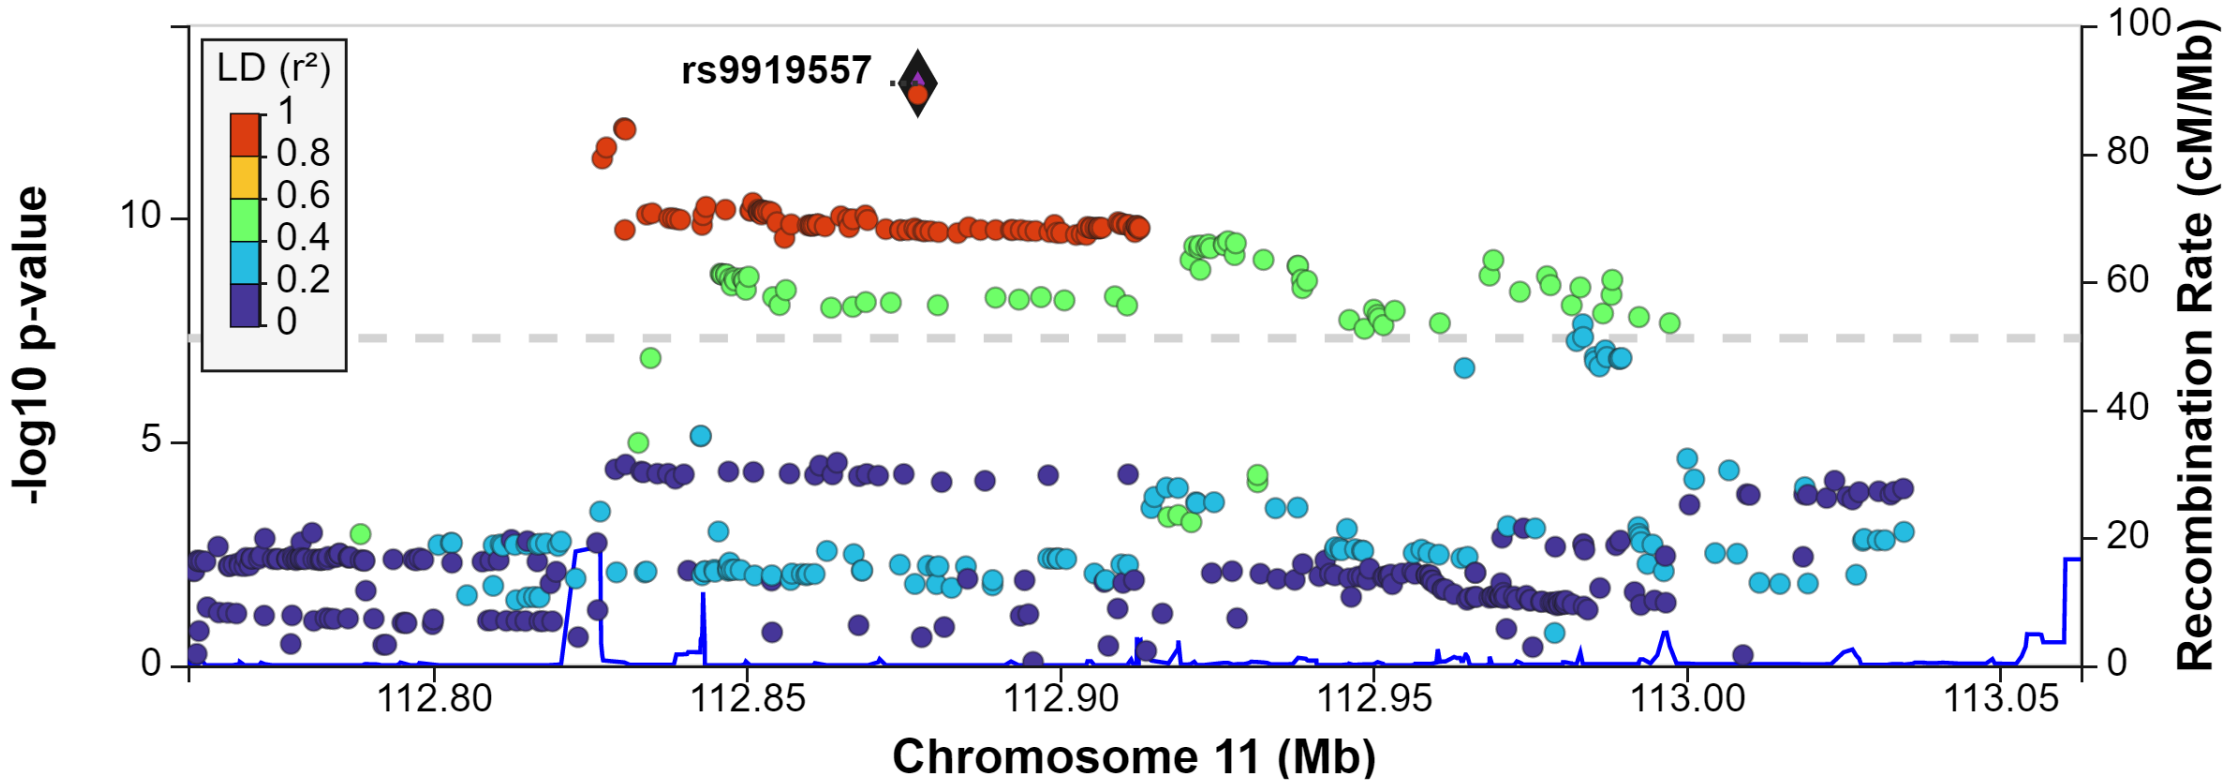

← *AP000802.1*

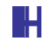

*NCAM1* →

*RNU7-187P* →

# ADHDxCU GWAS

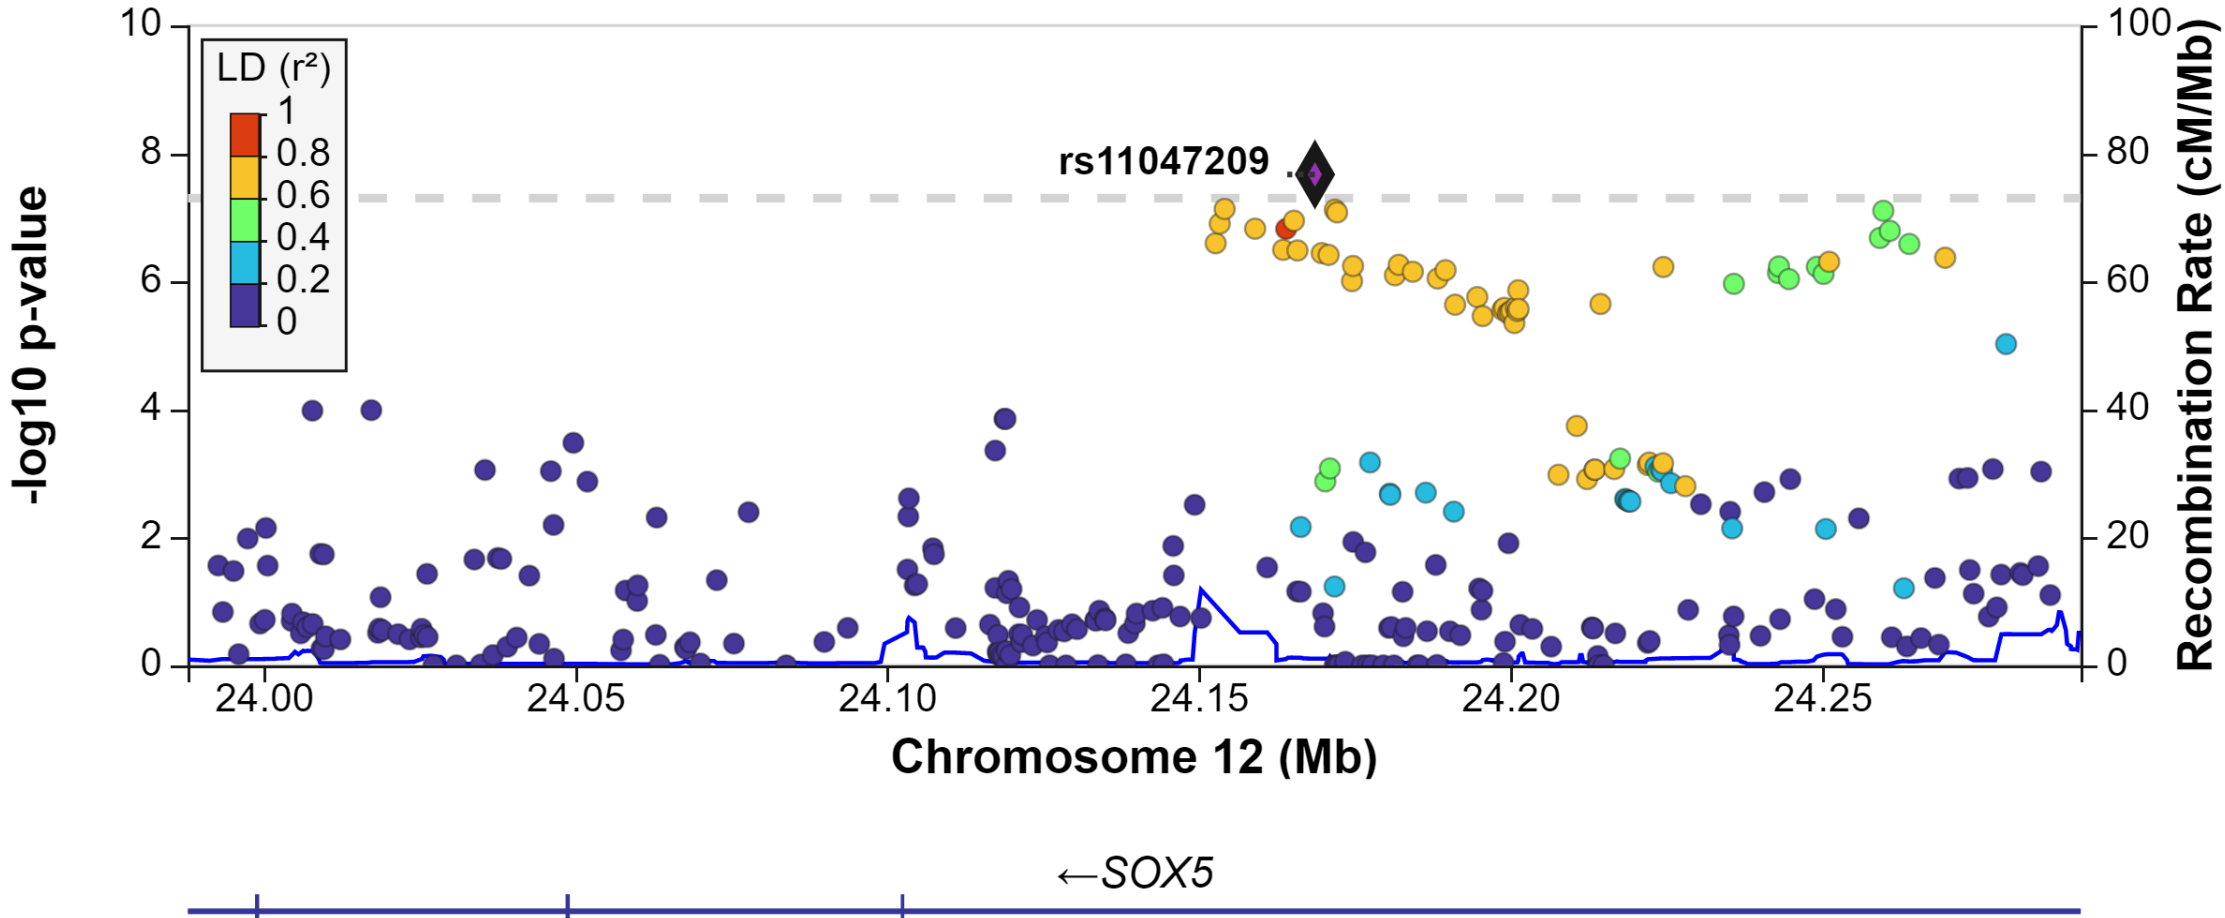

# ADHDxCU GWAS

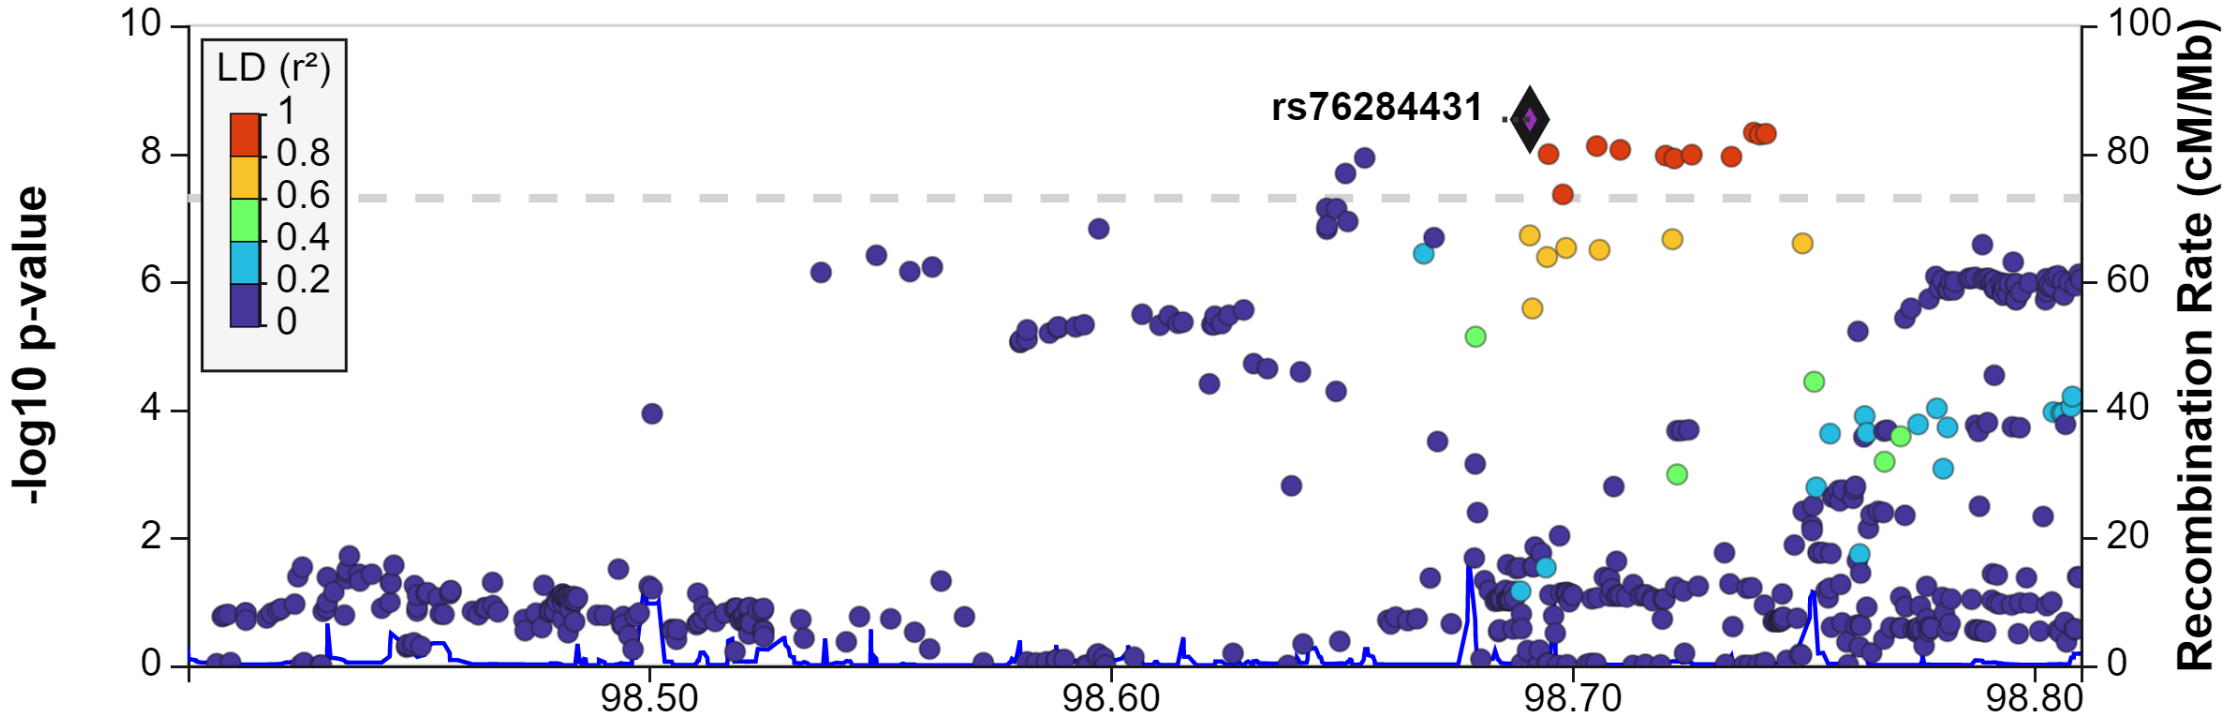

← *LINC01550*

← *AL163932.1*

← *AL163760.1*

*LINC02295* →  
H

# ADHDxCUD GWAS

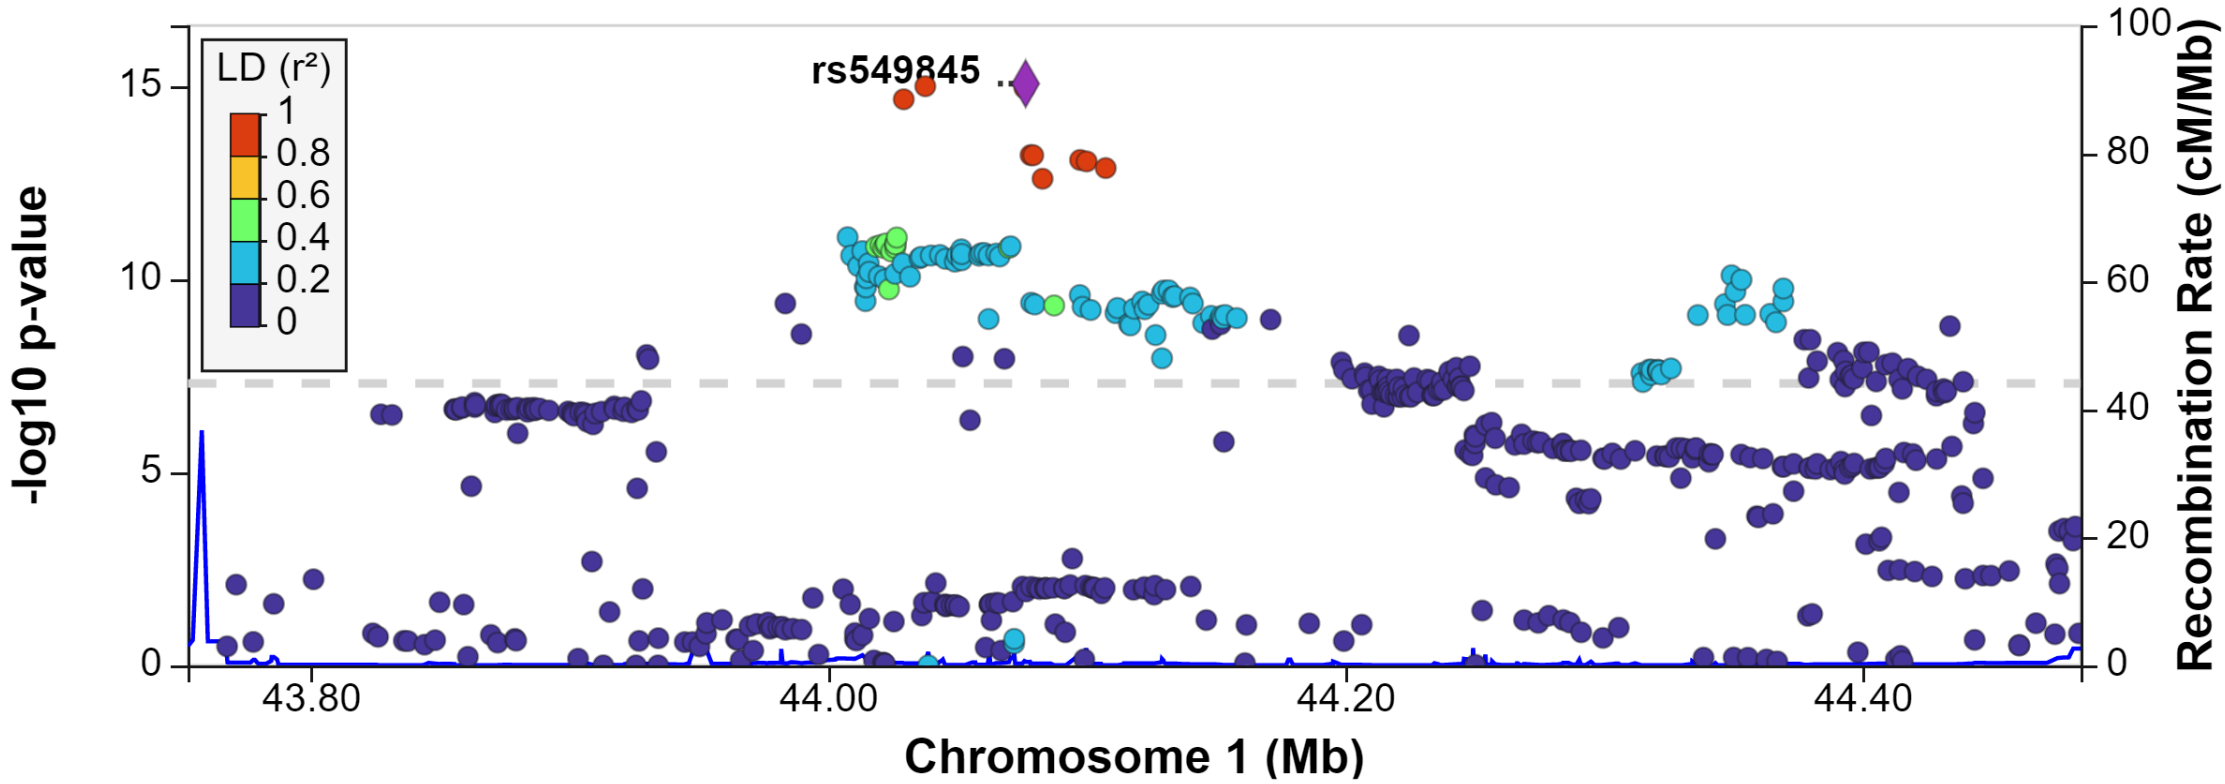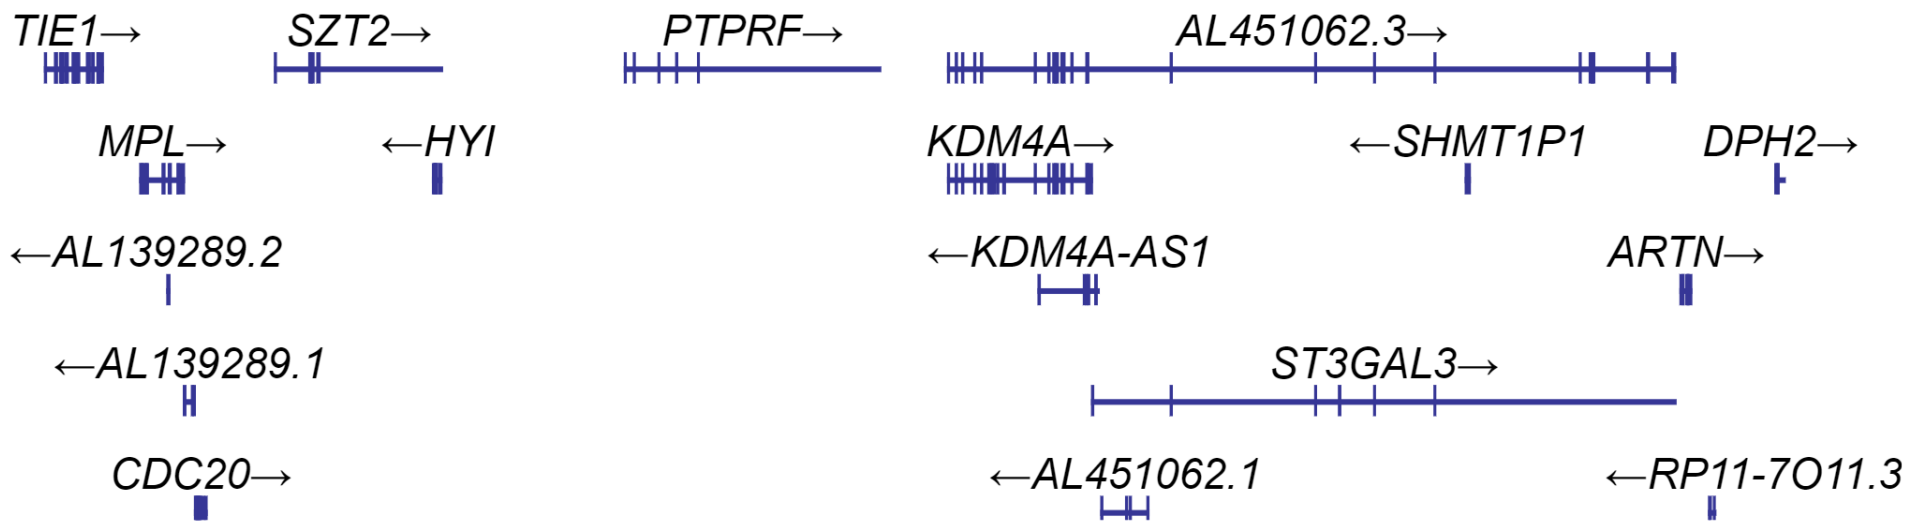

# ADHDxCD GWAS

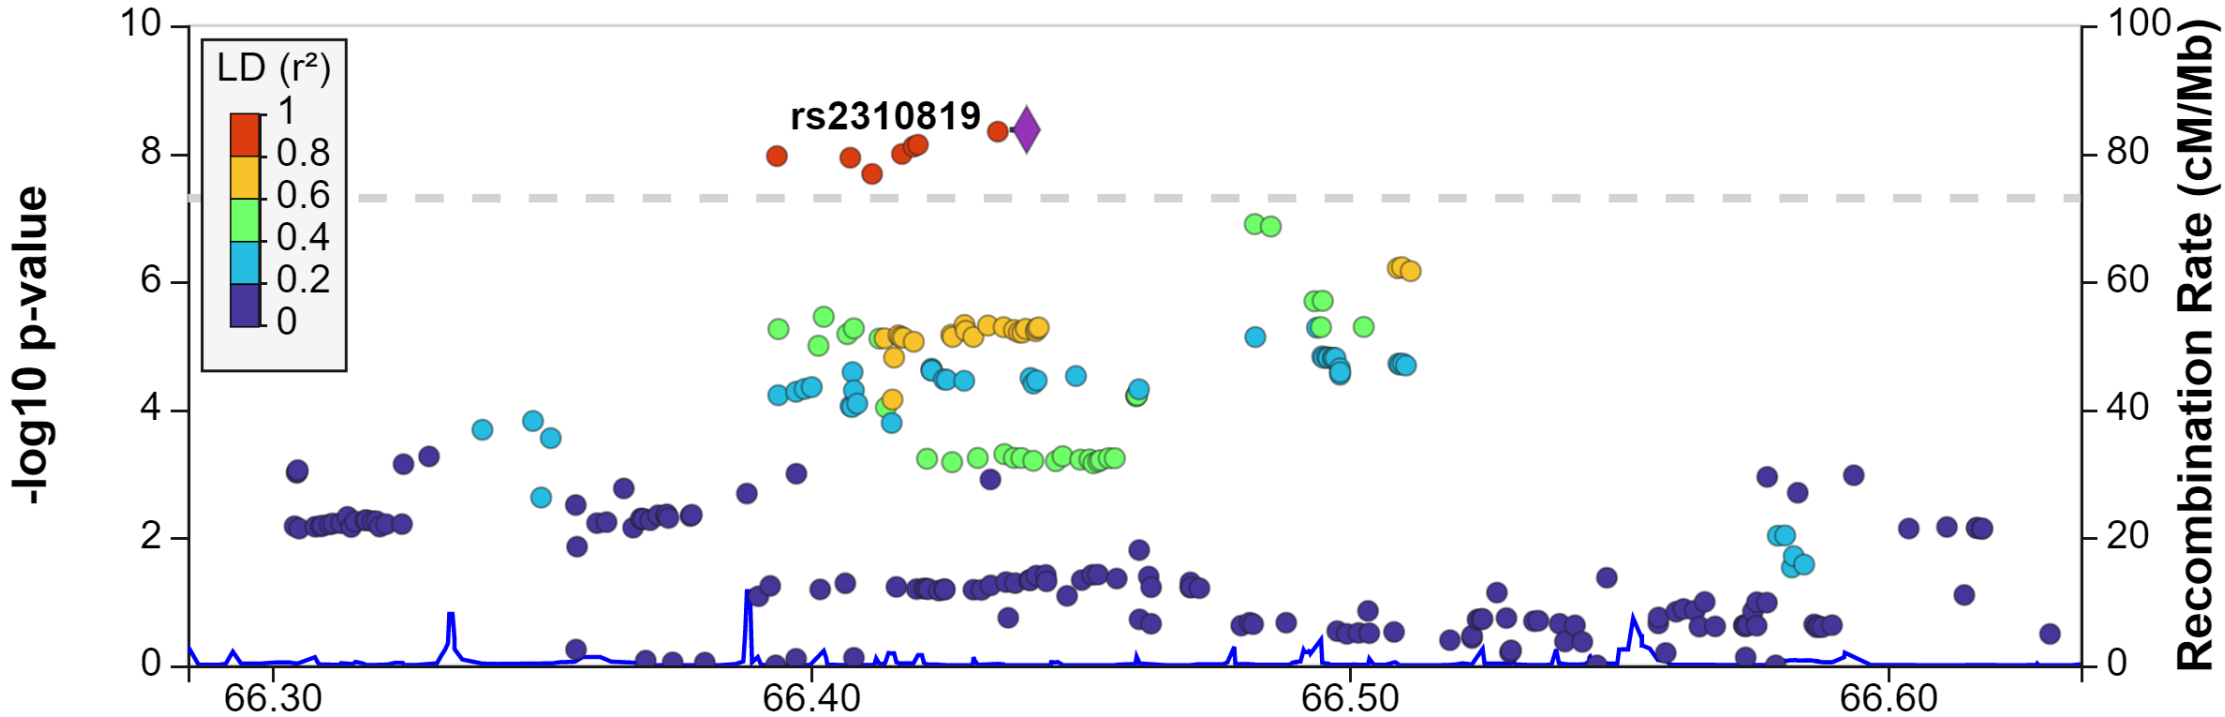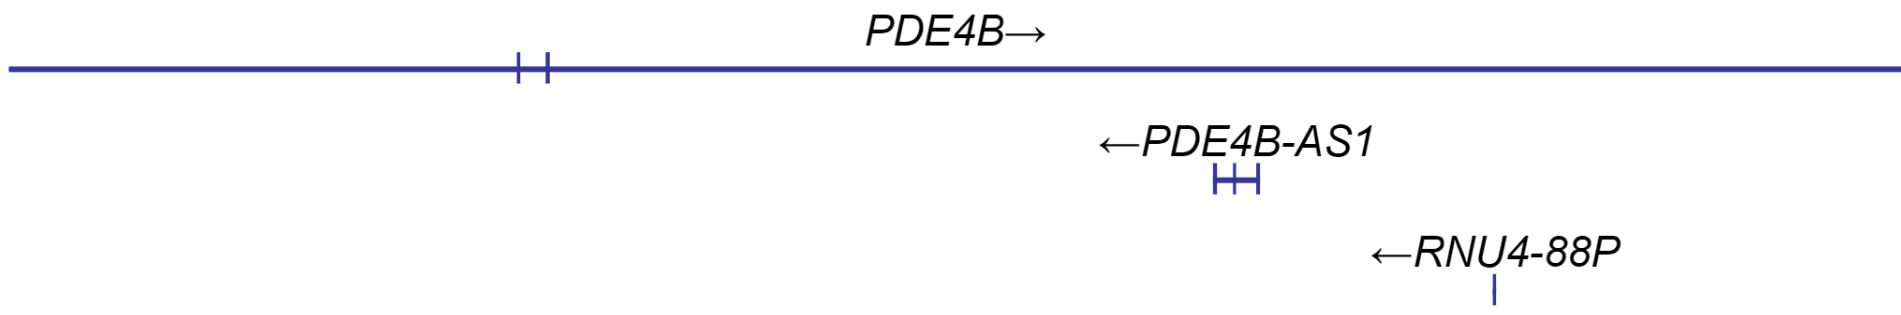

# ADHDxCUD GWAS

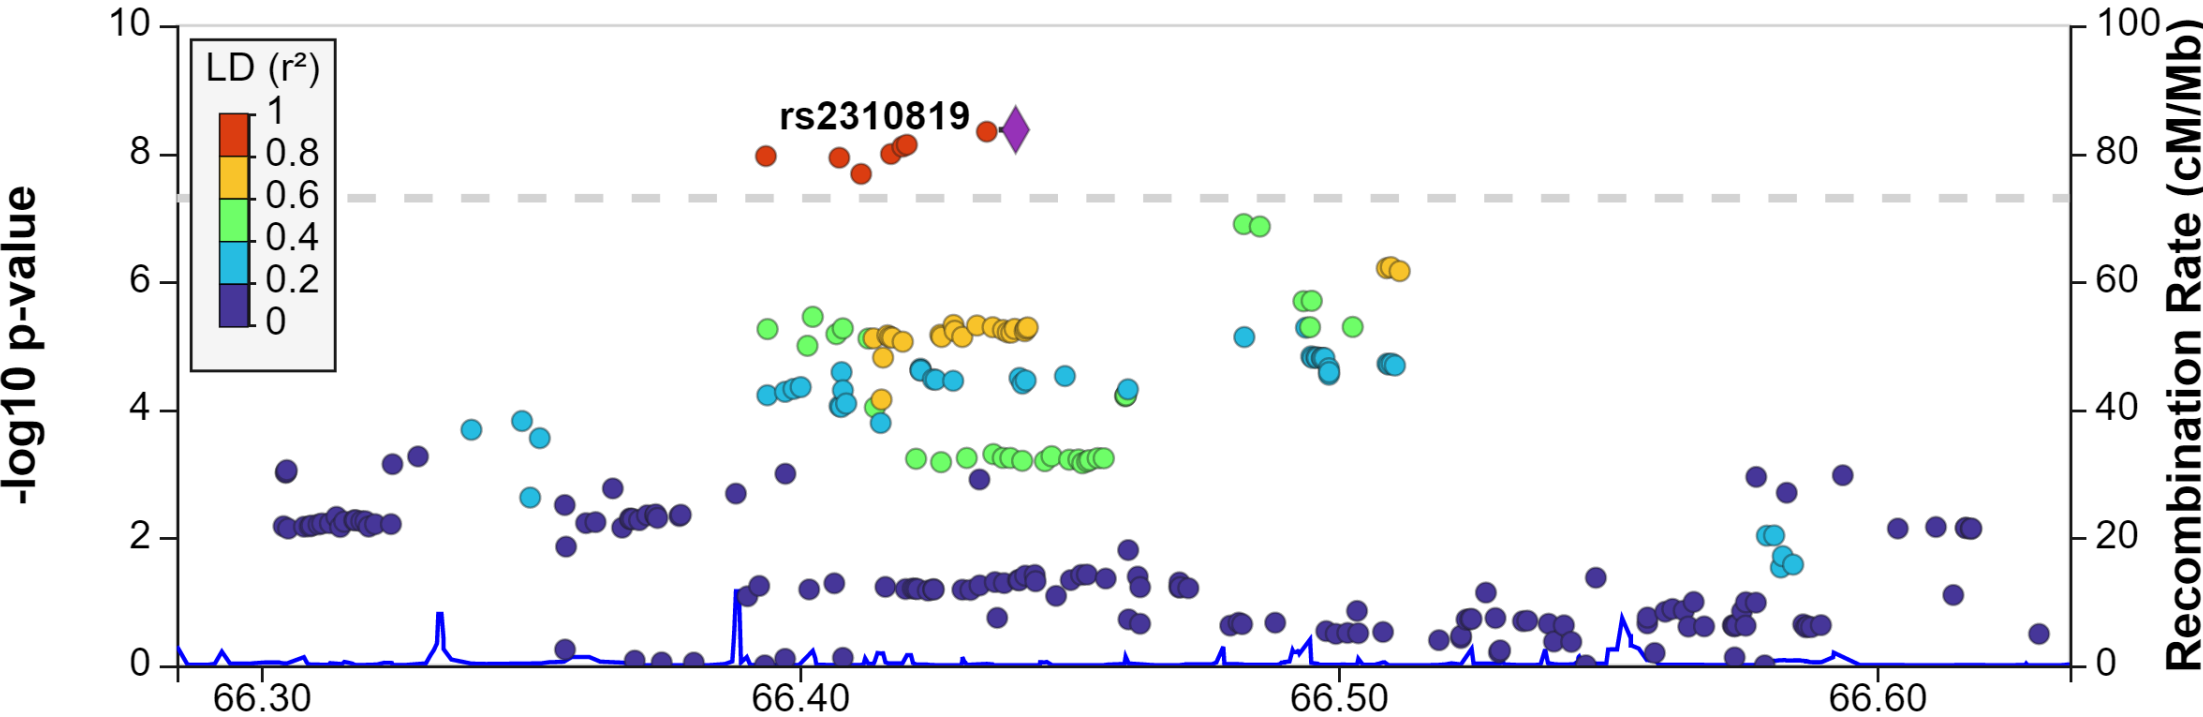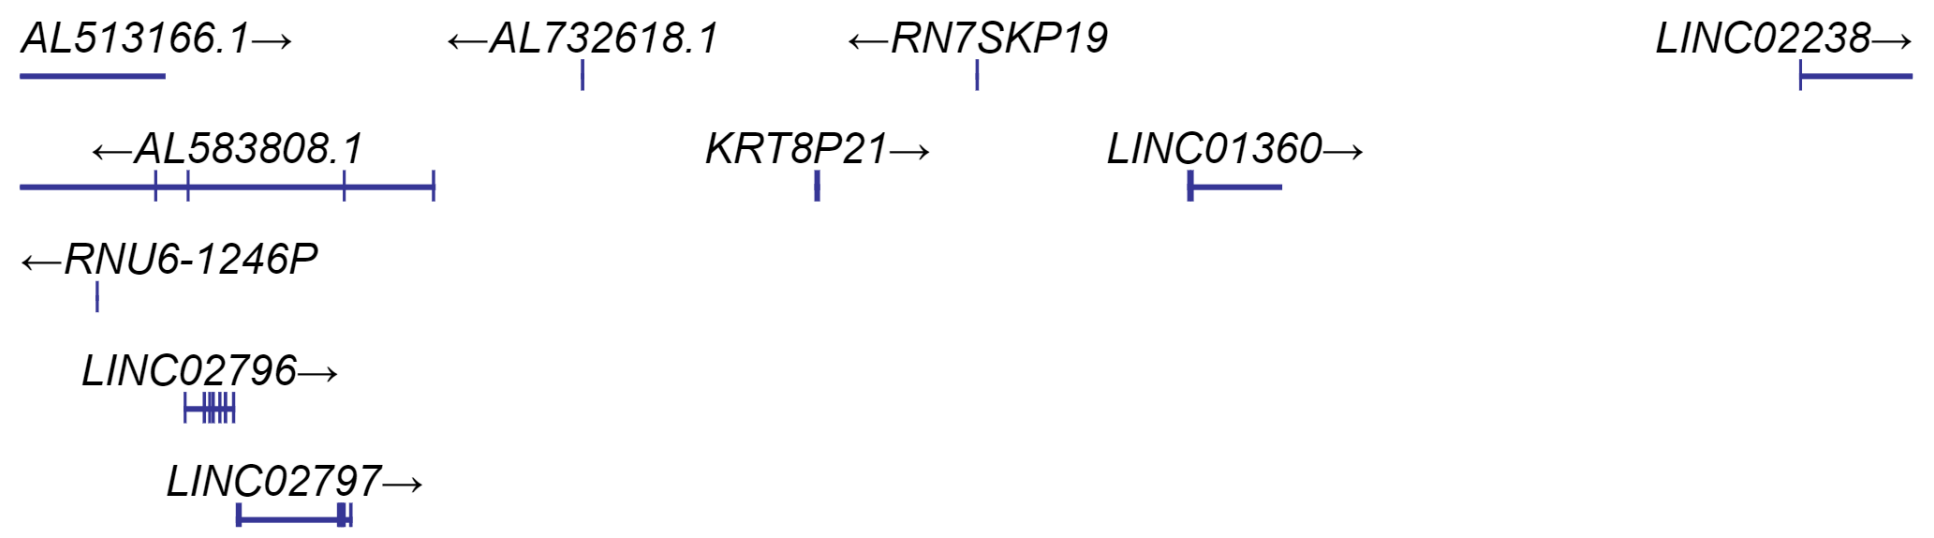



# ADHDxCUD GWAS

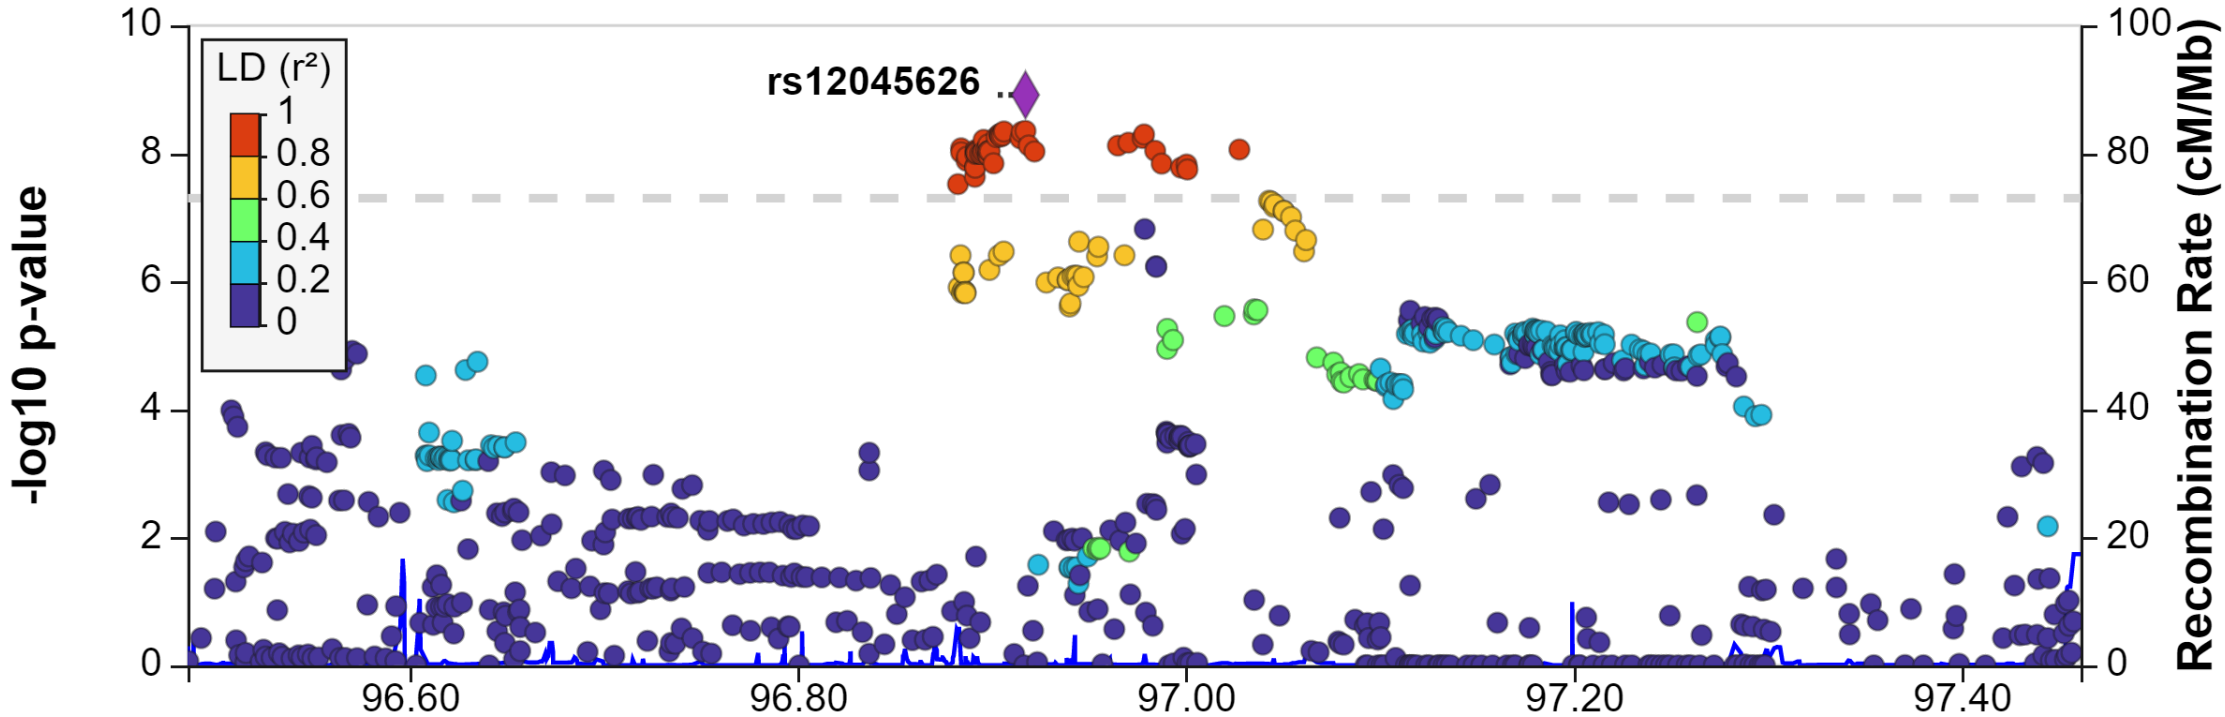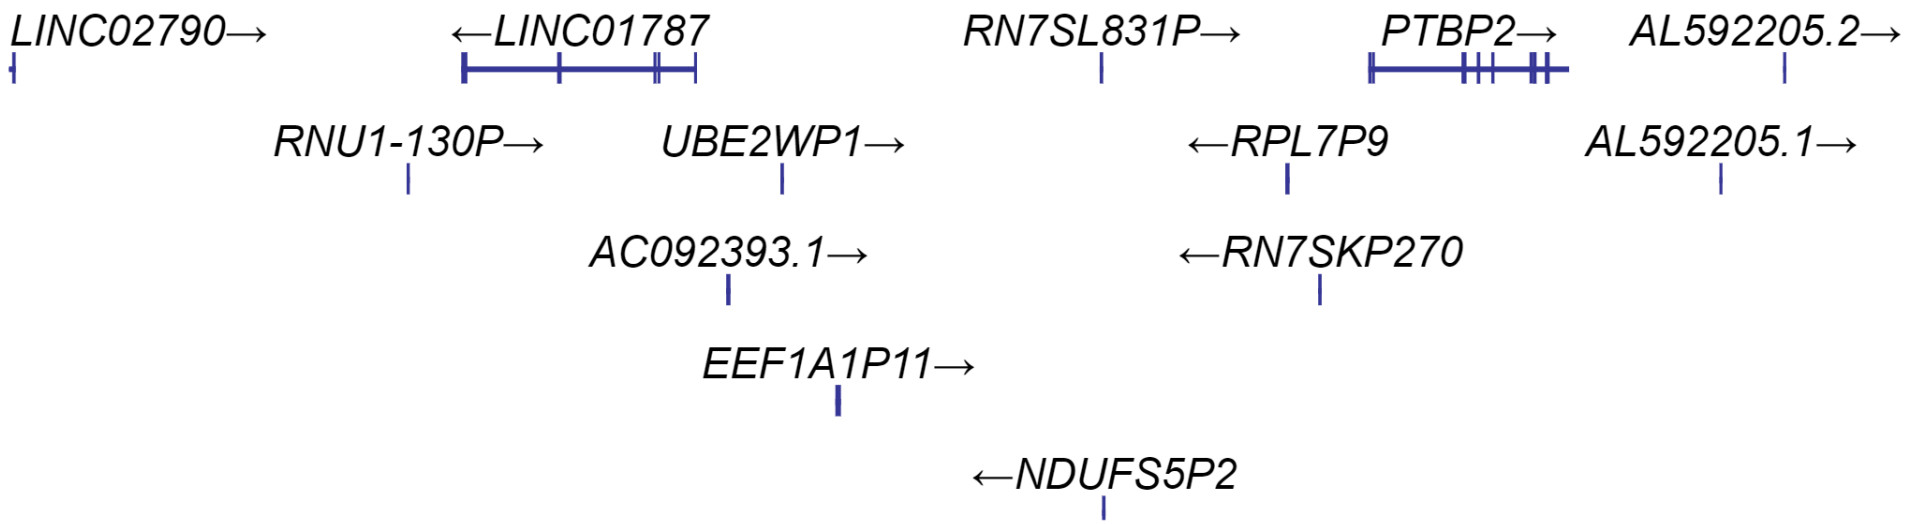

# ADHDxCUD GWAS

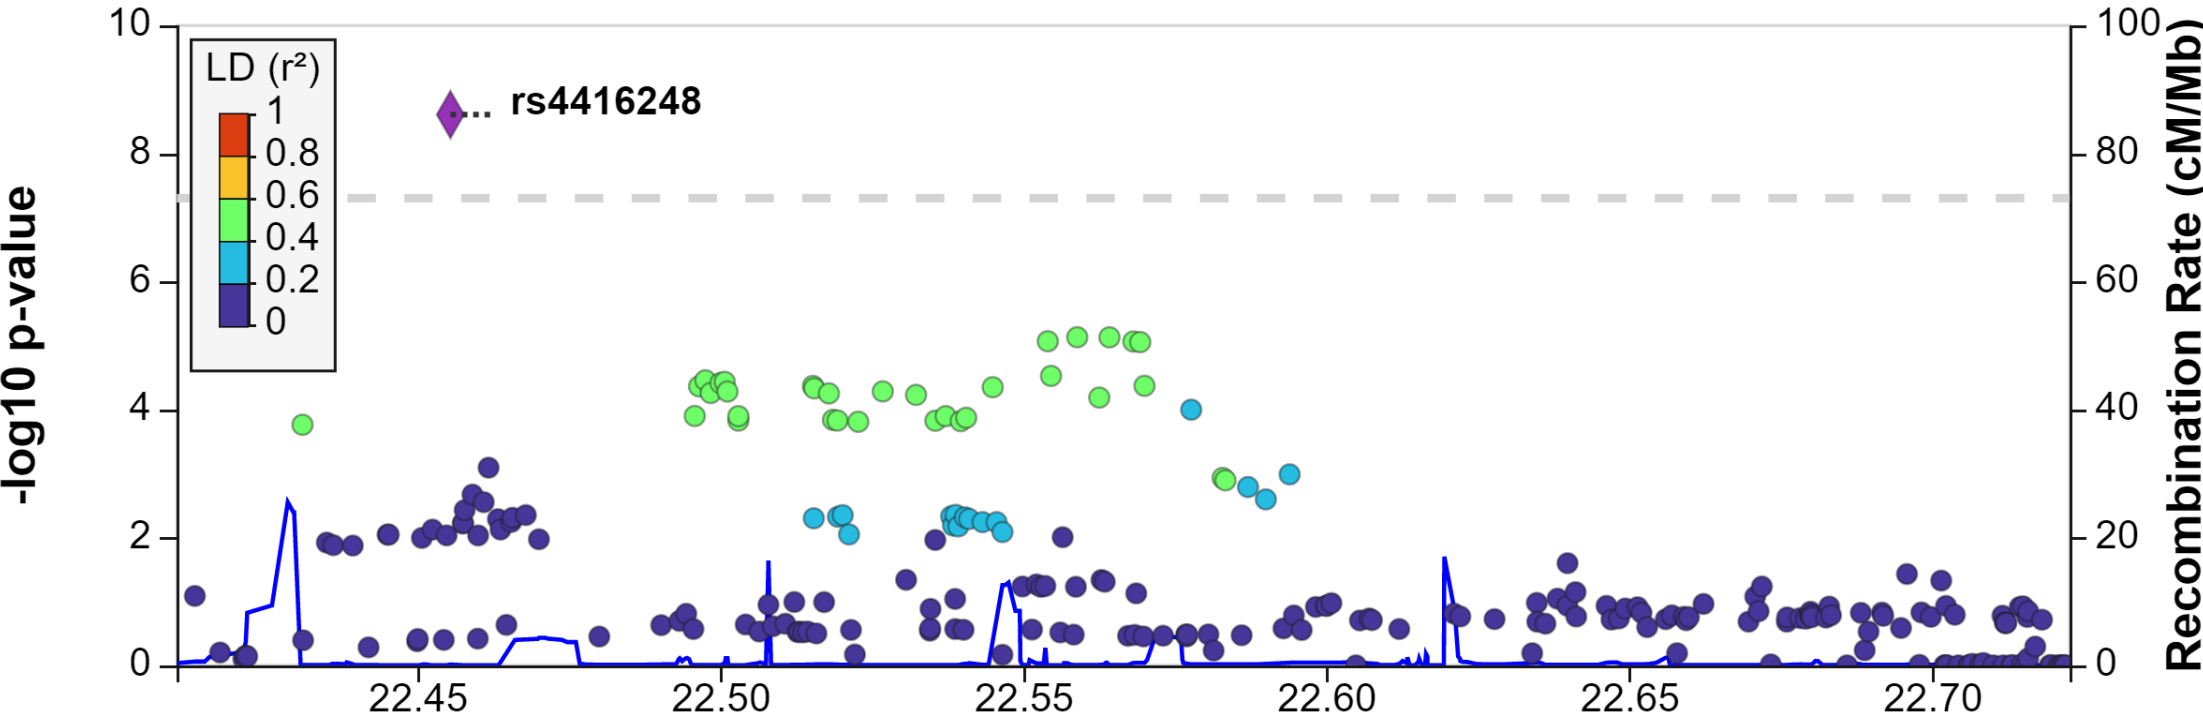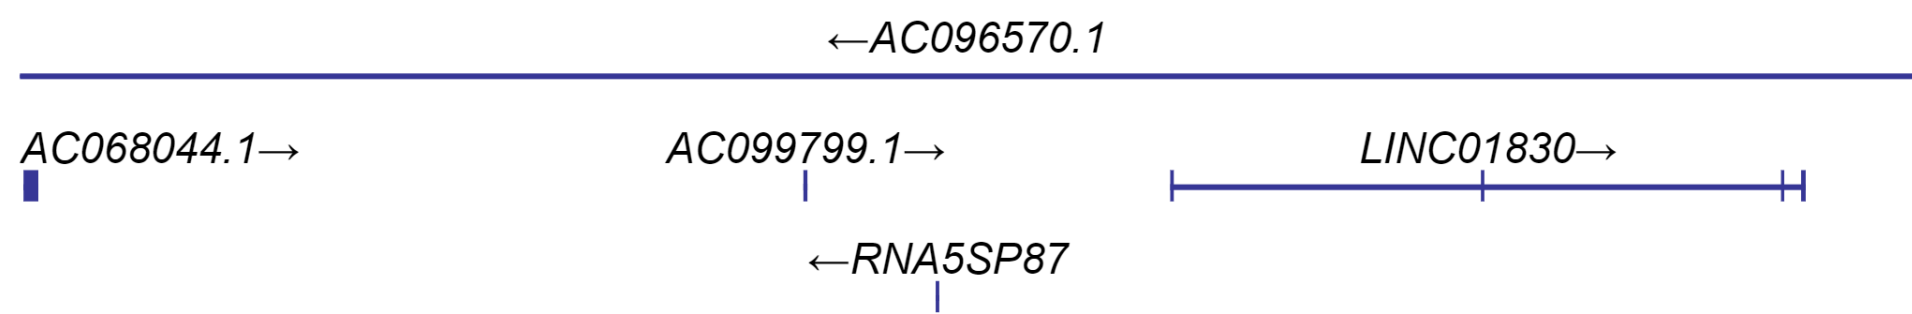

# ADHDxCUD GWAS

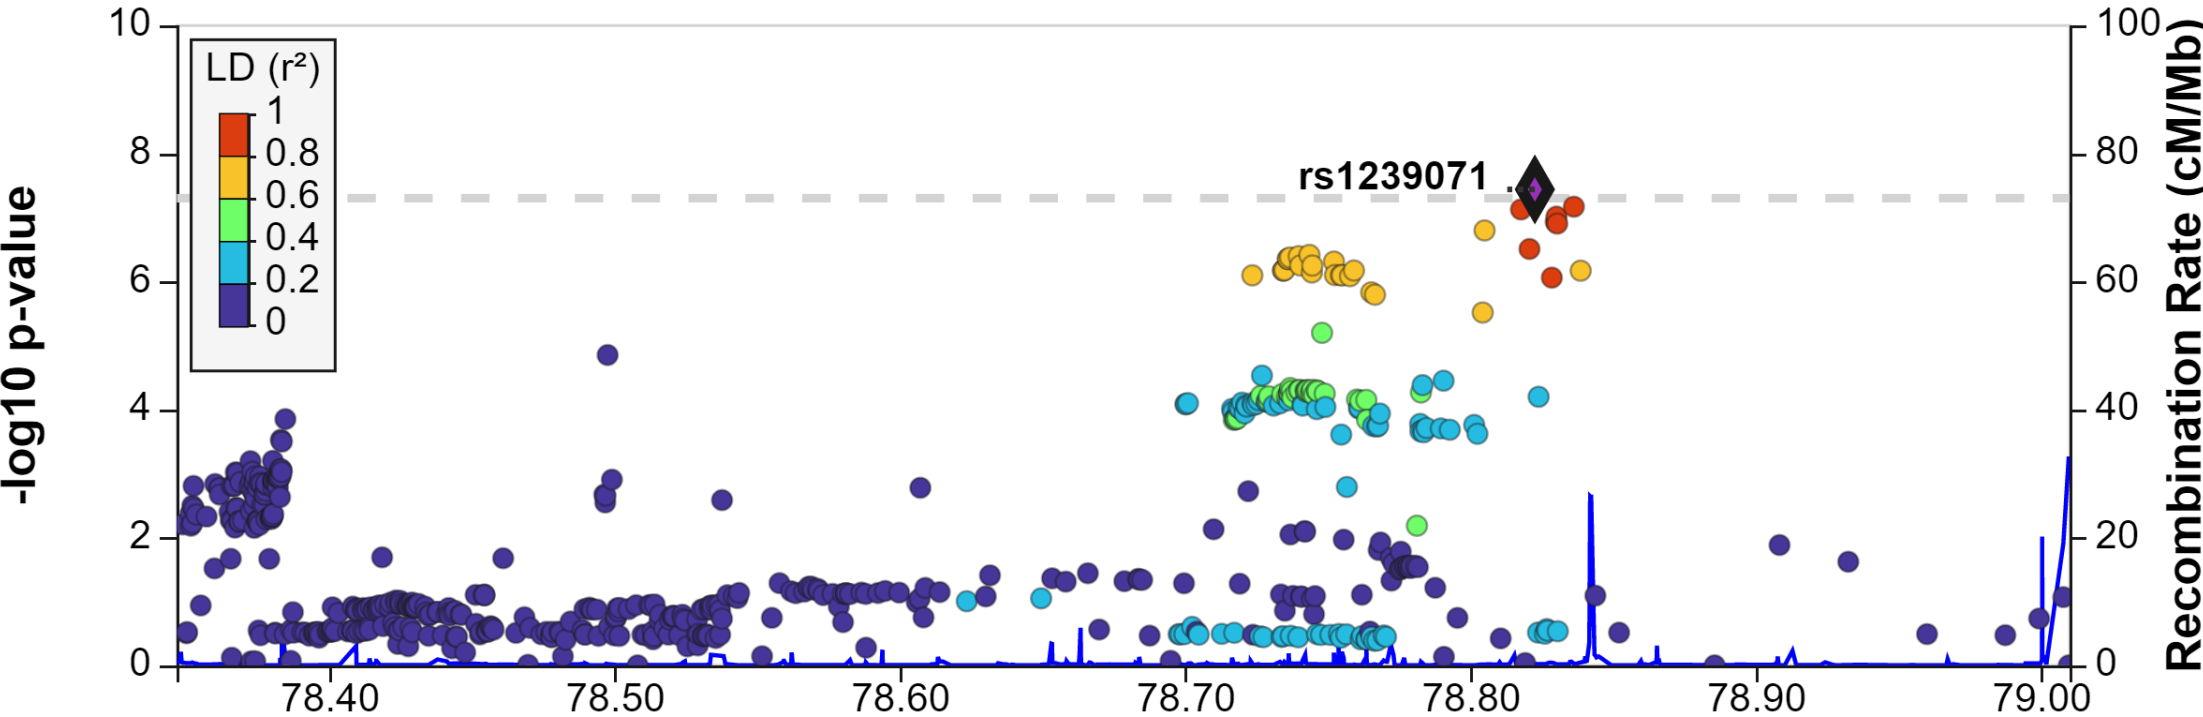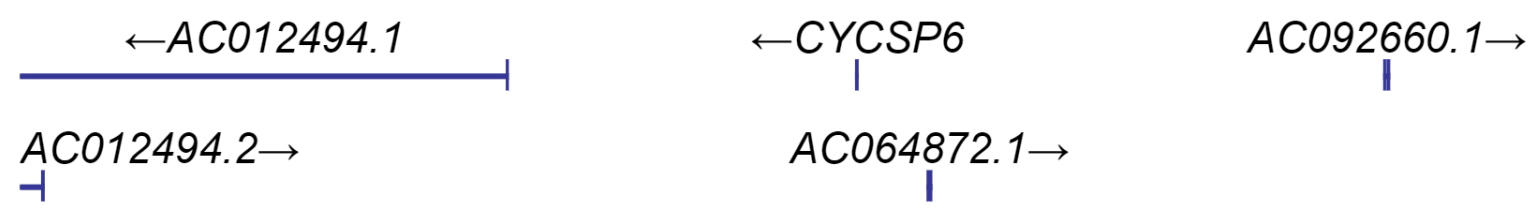

# ADHDxCUD GWAS

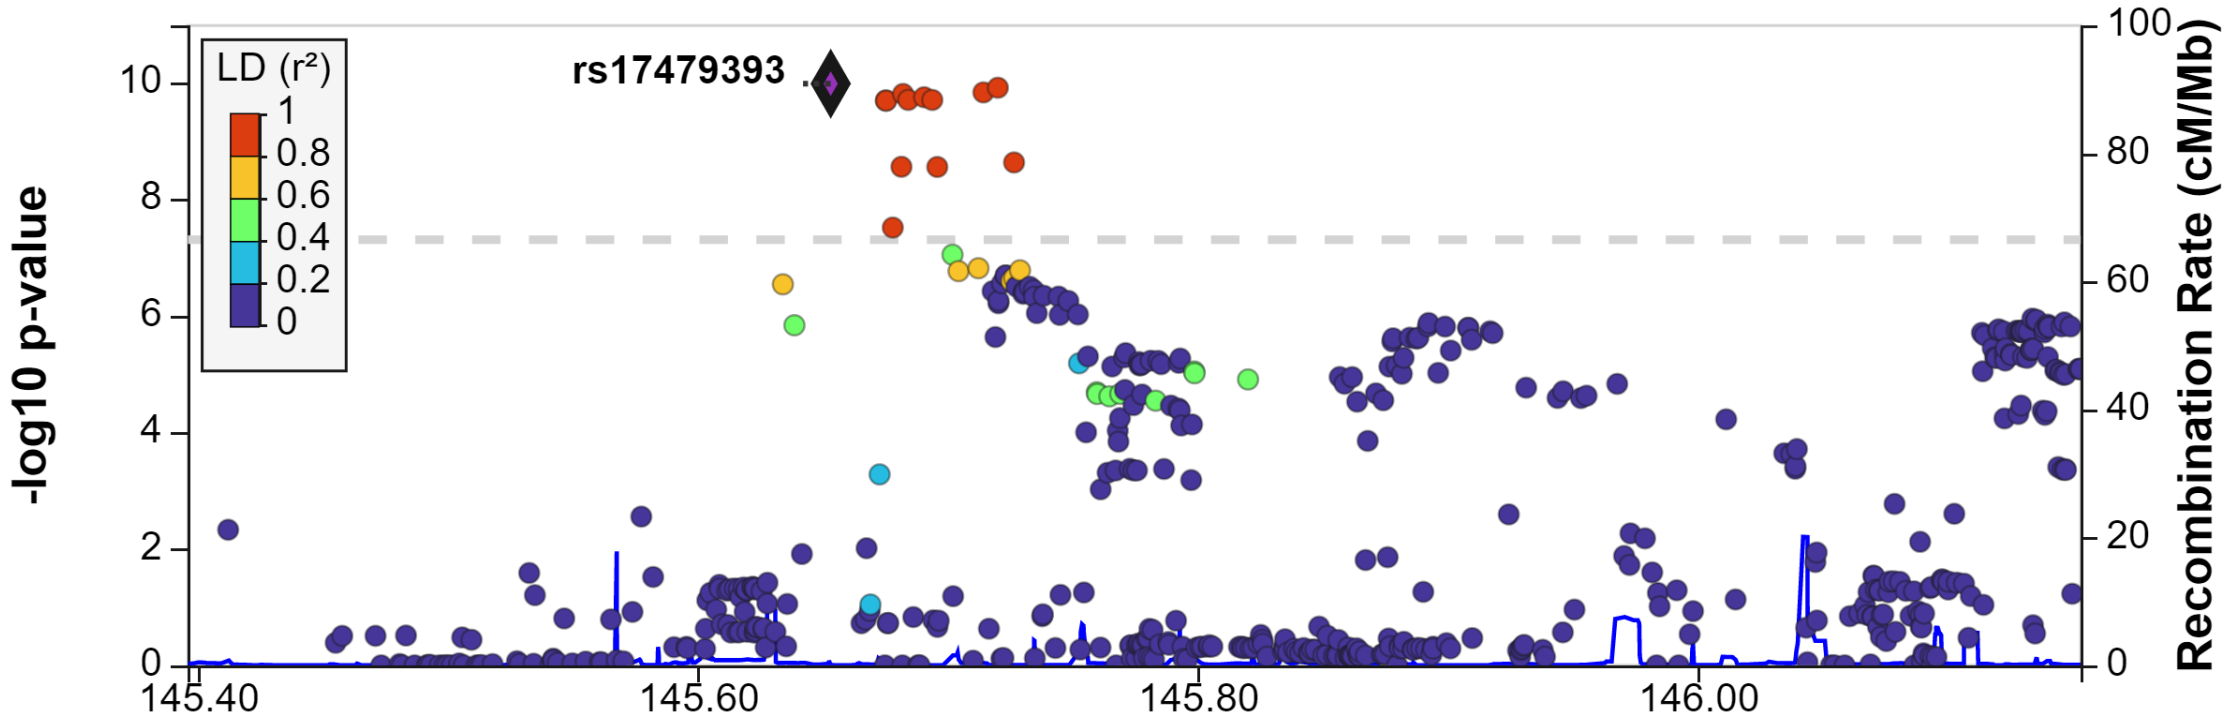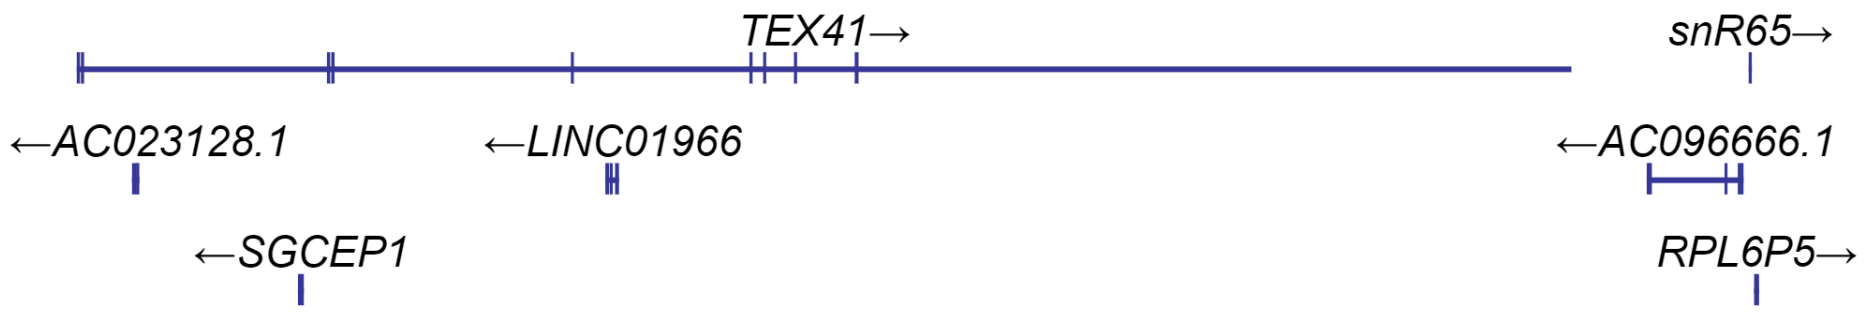

# ADHDxCUD GWAS

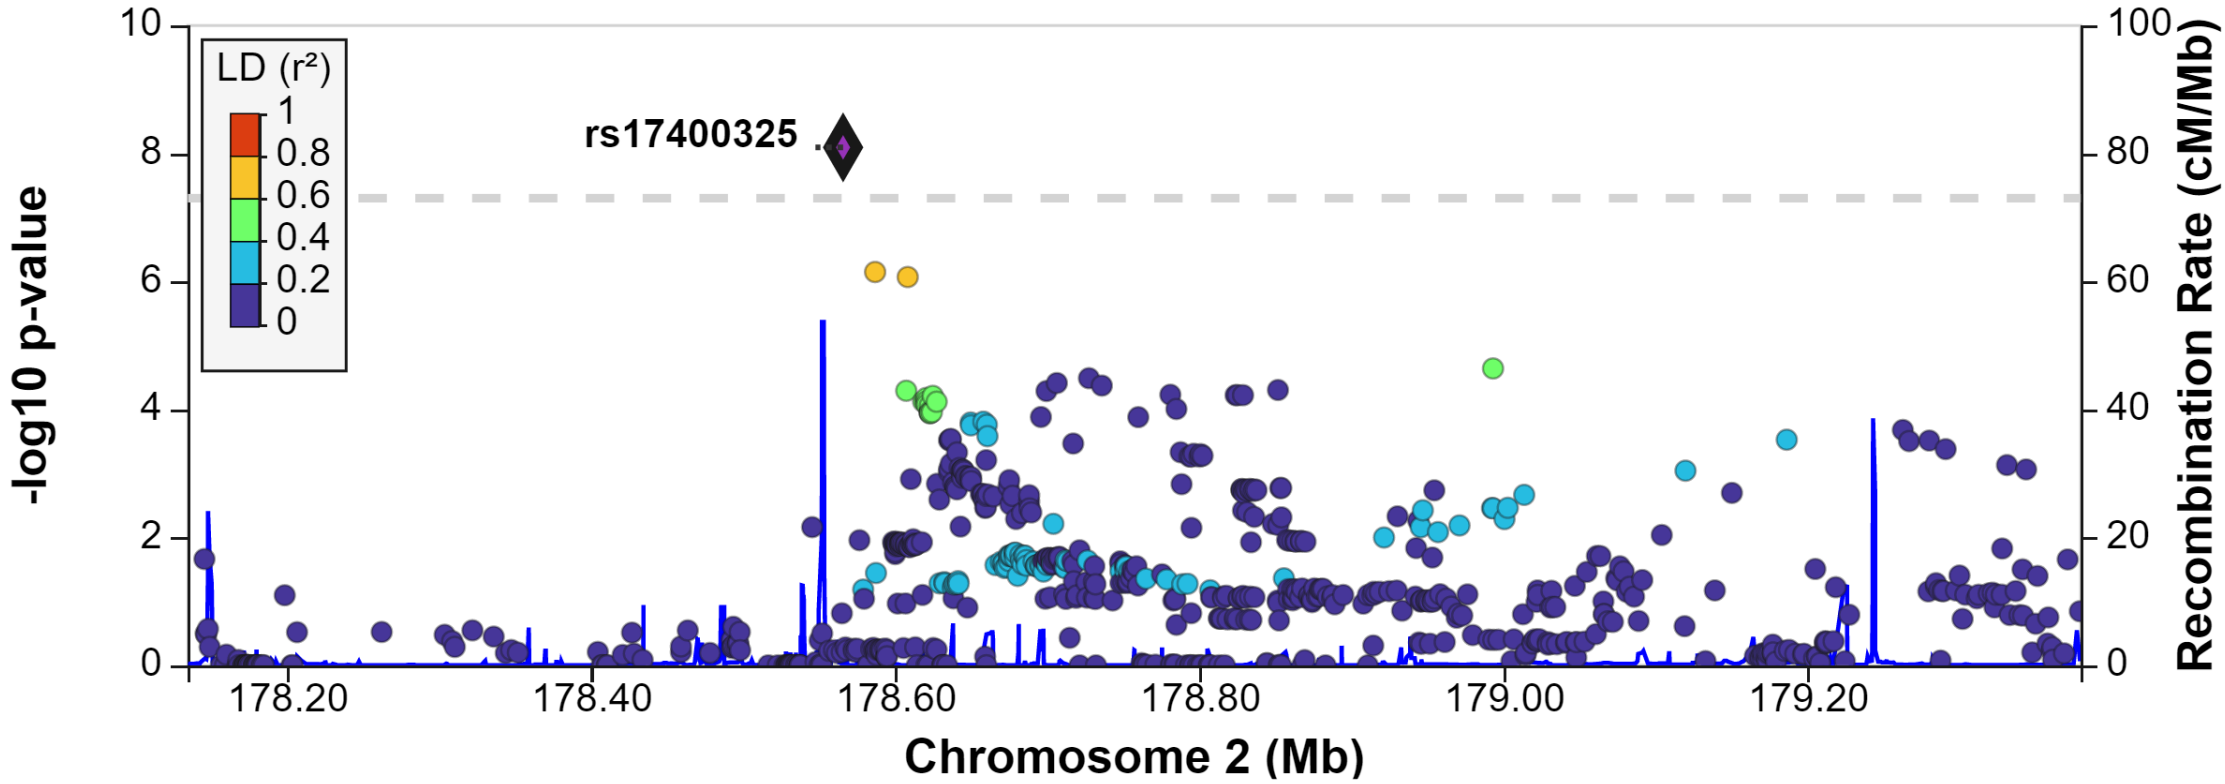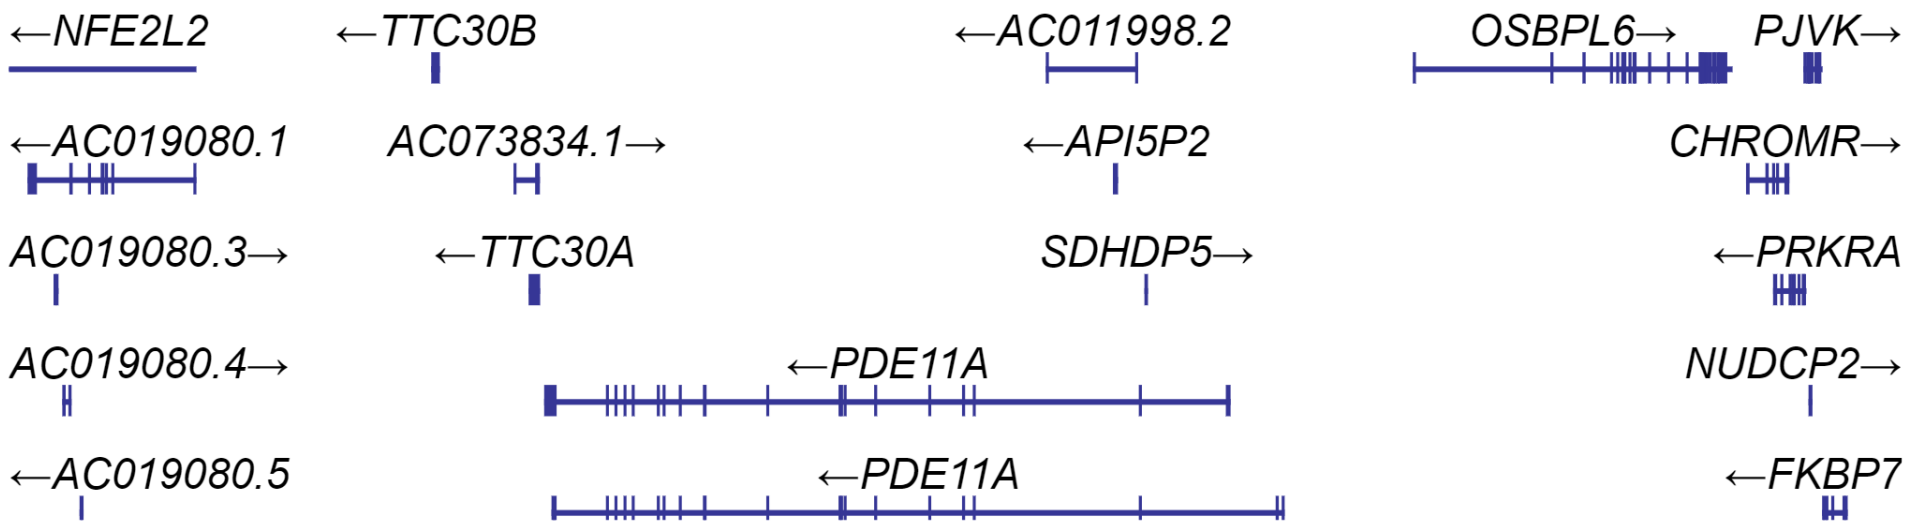

# ADHDxCUD GWAS

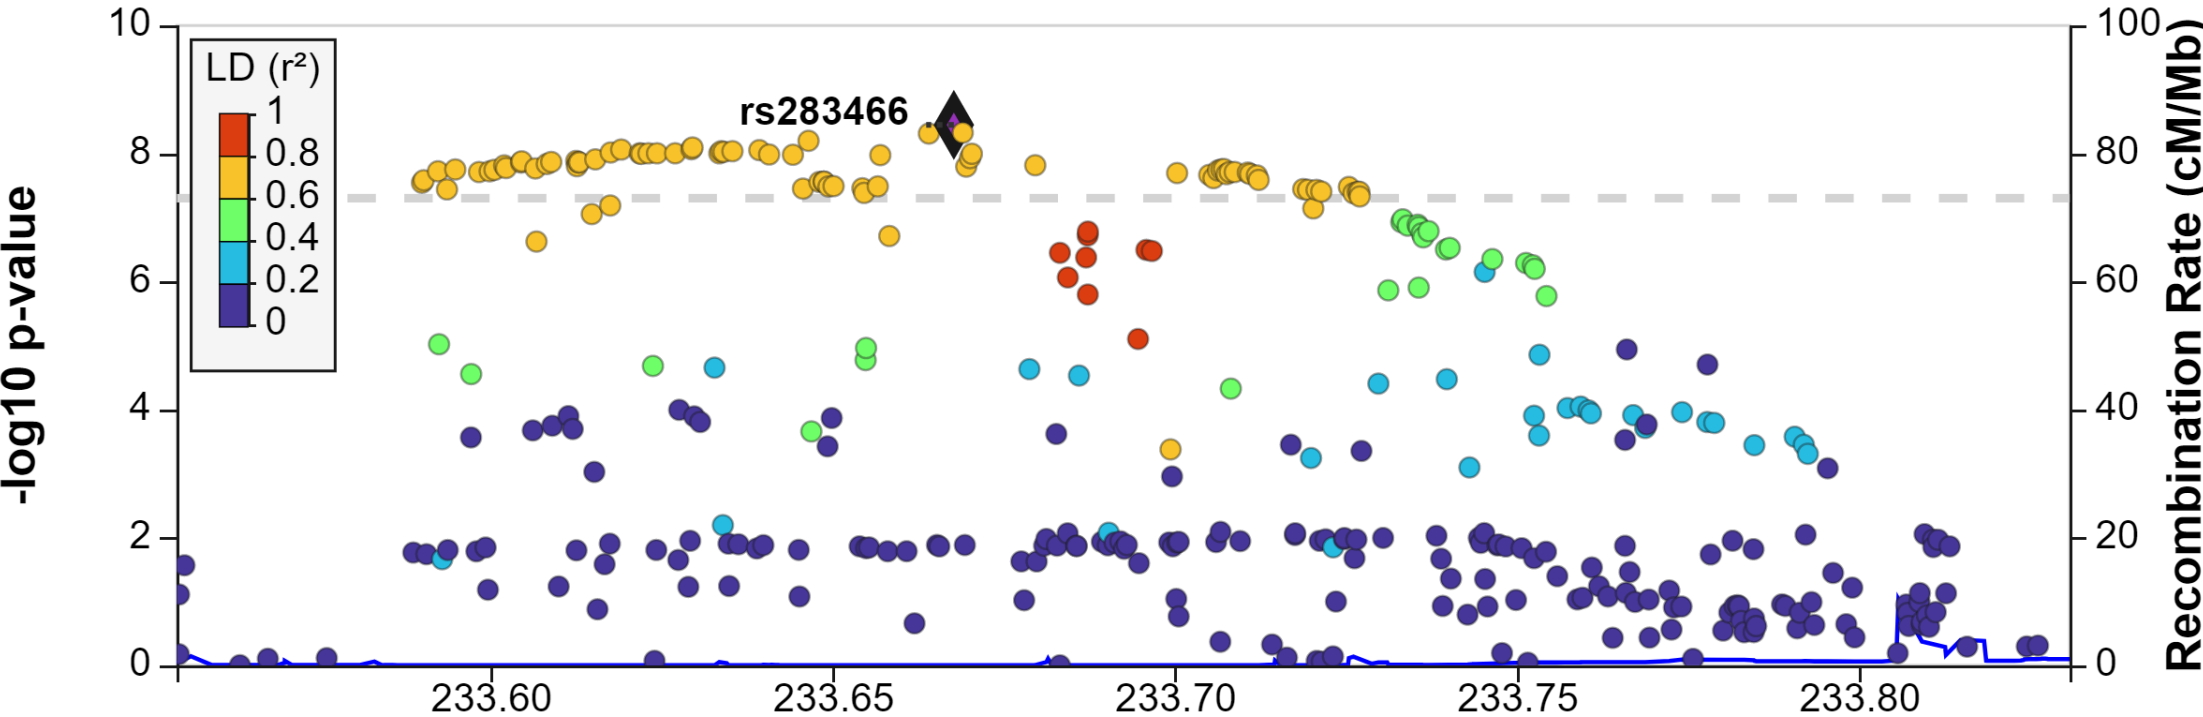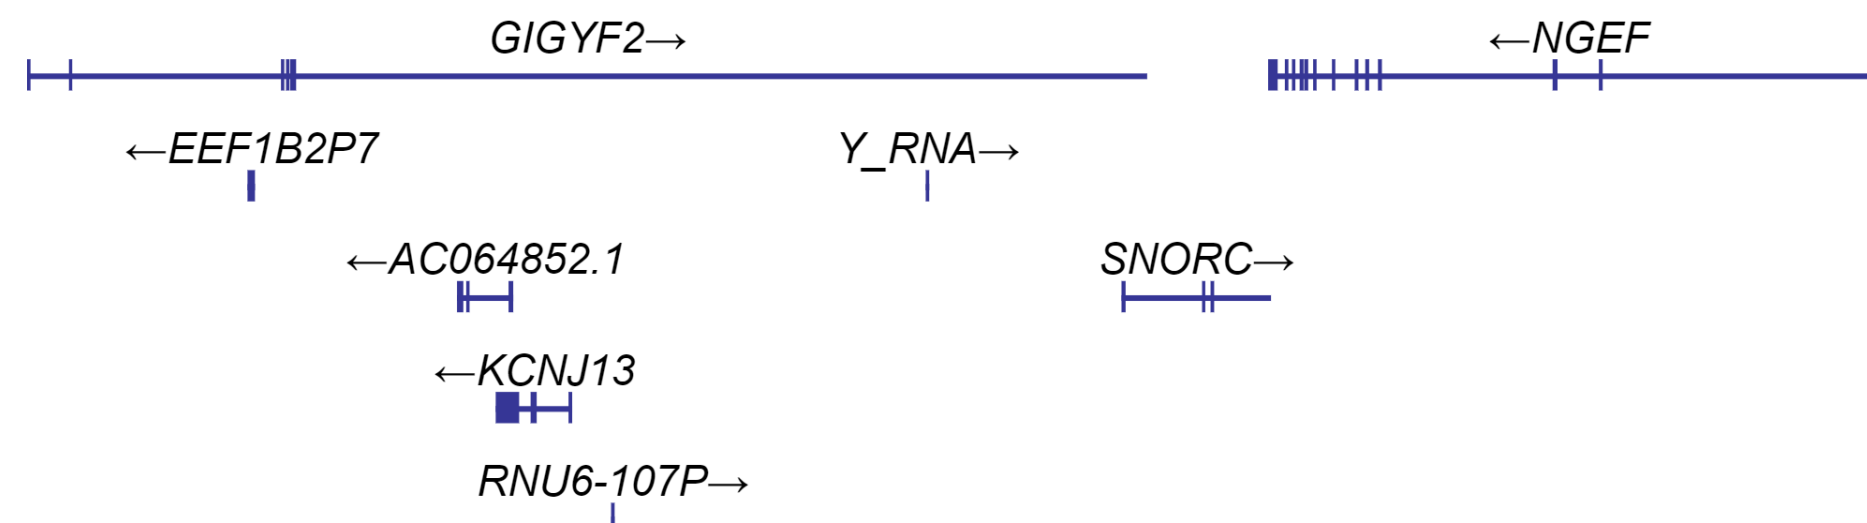

# ADHDxCUD GWAS

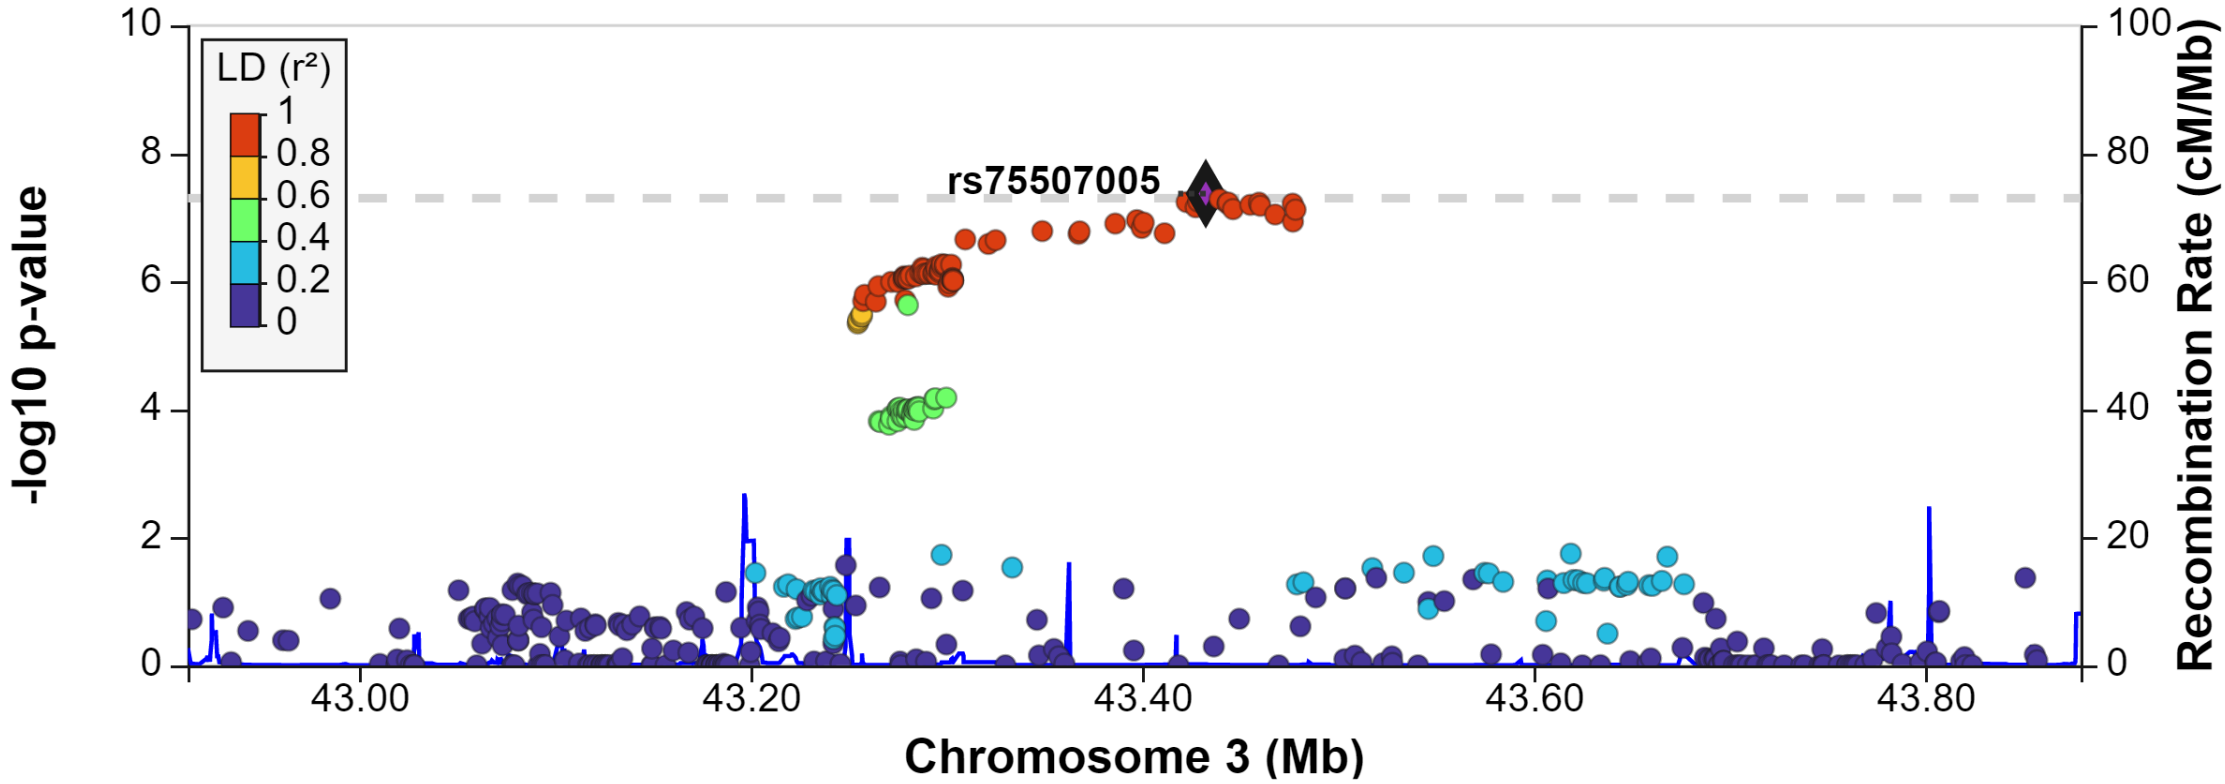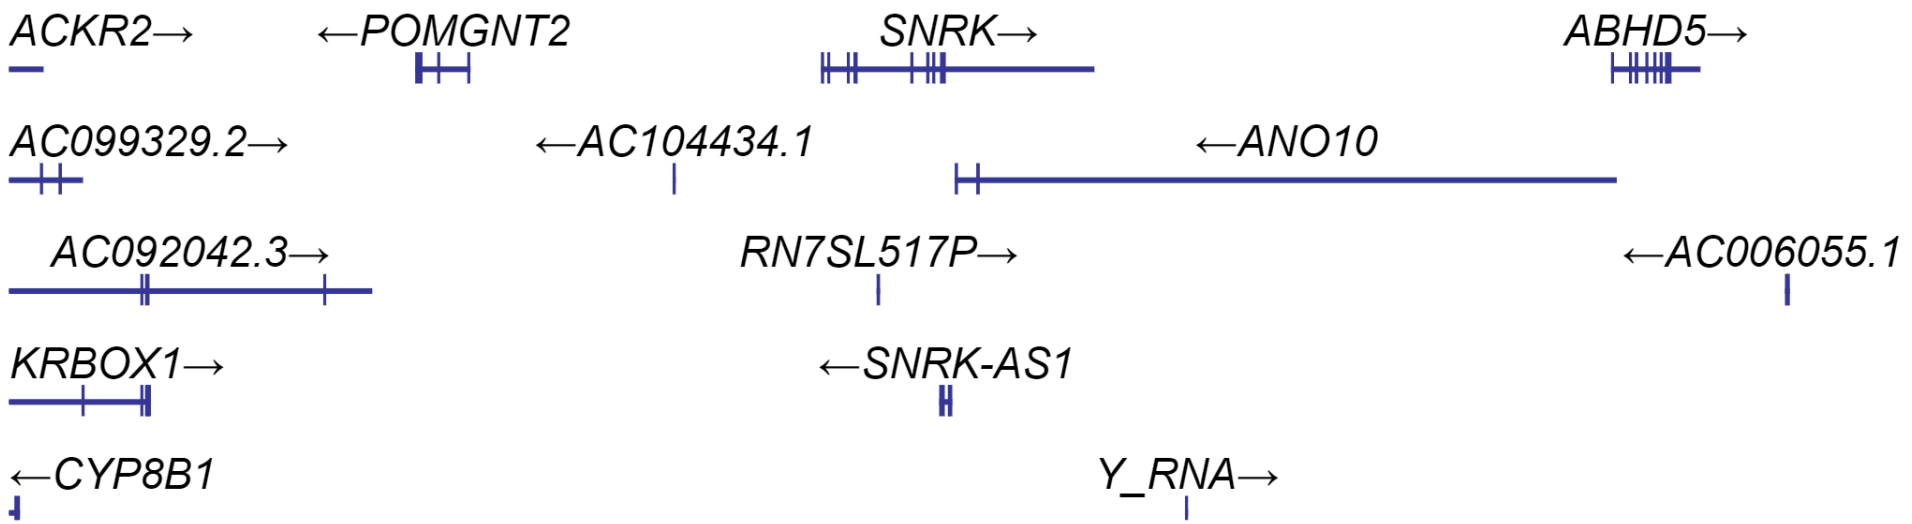

# ADHDxCUD GWAS

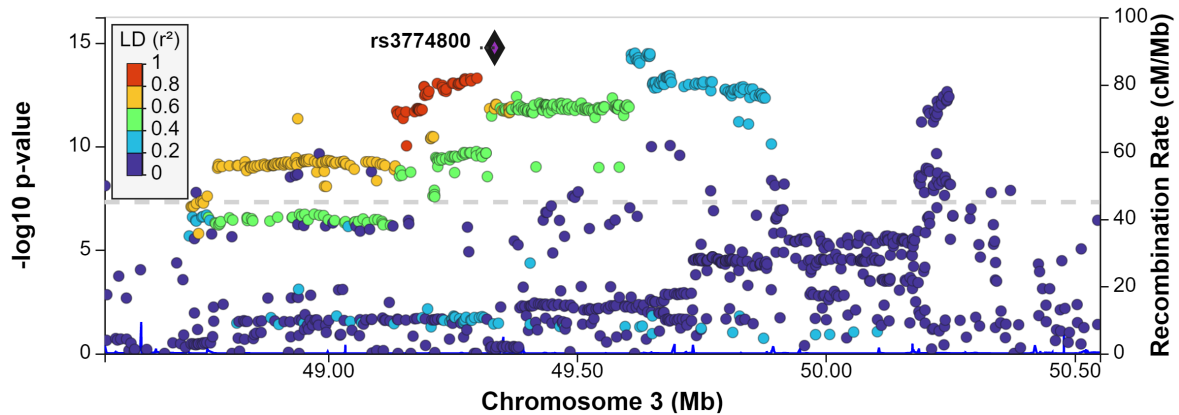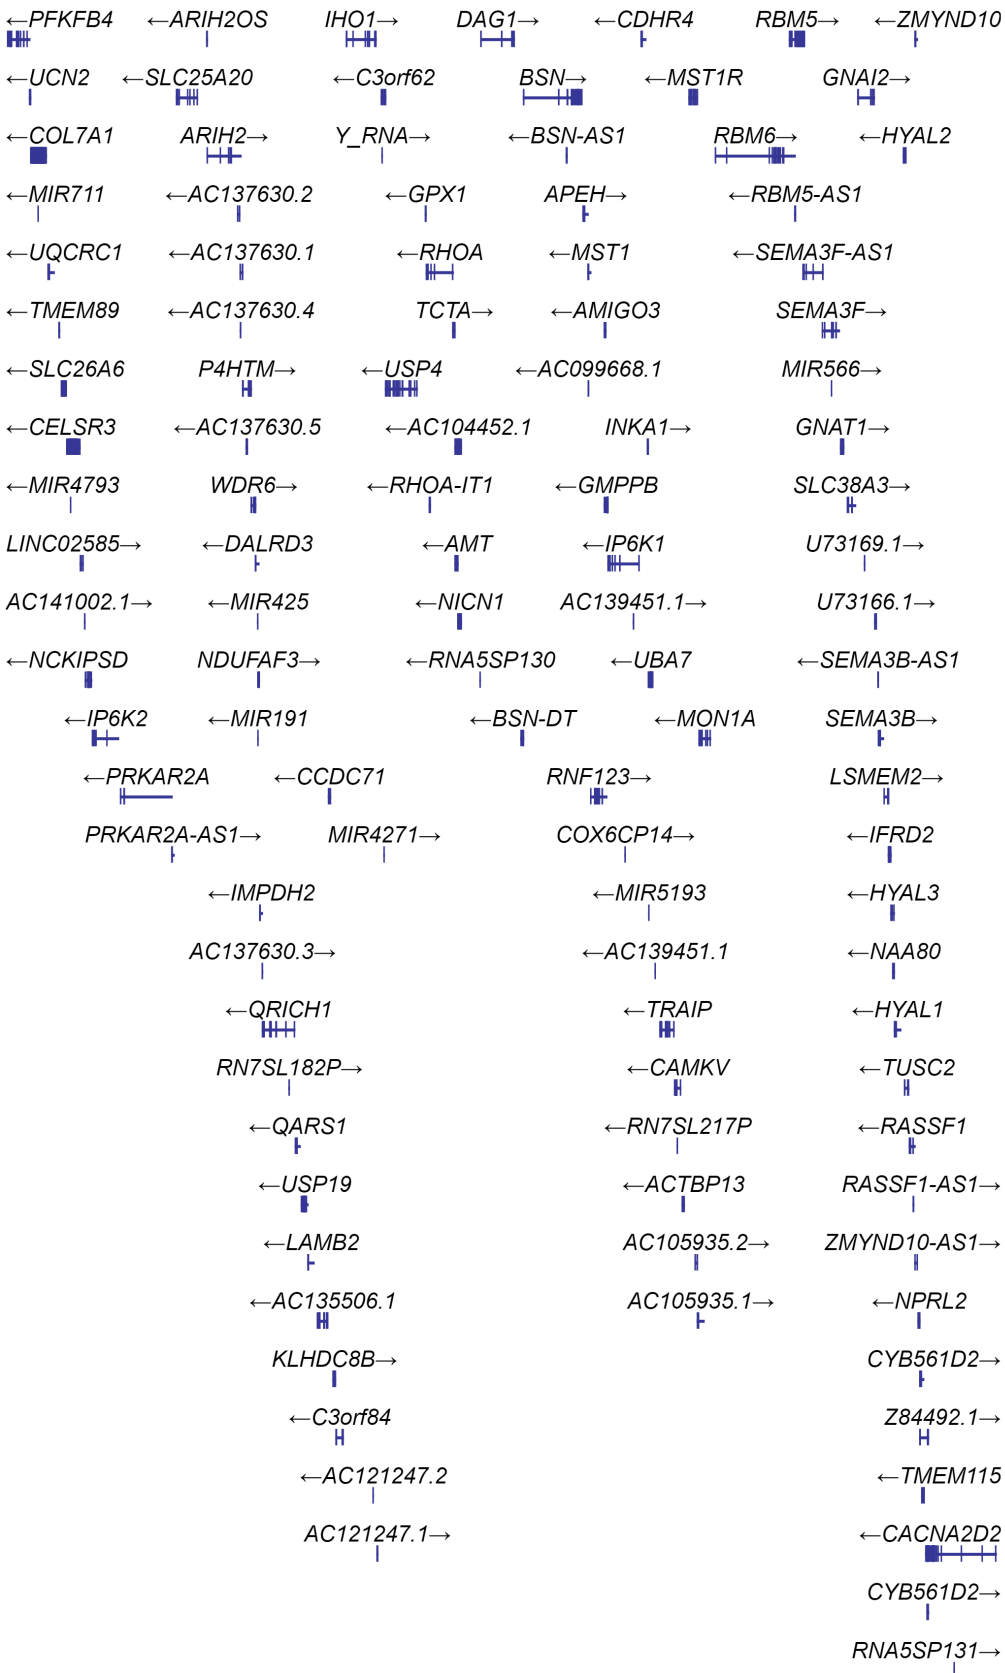



# ADHDxCUD GWAS

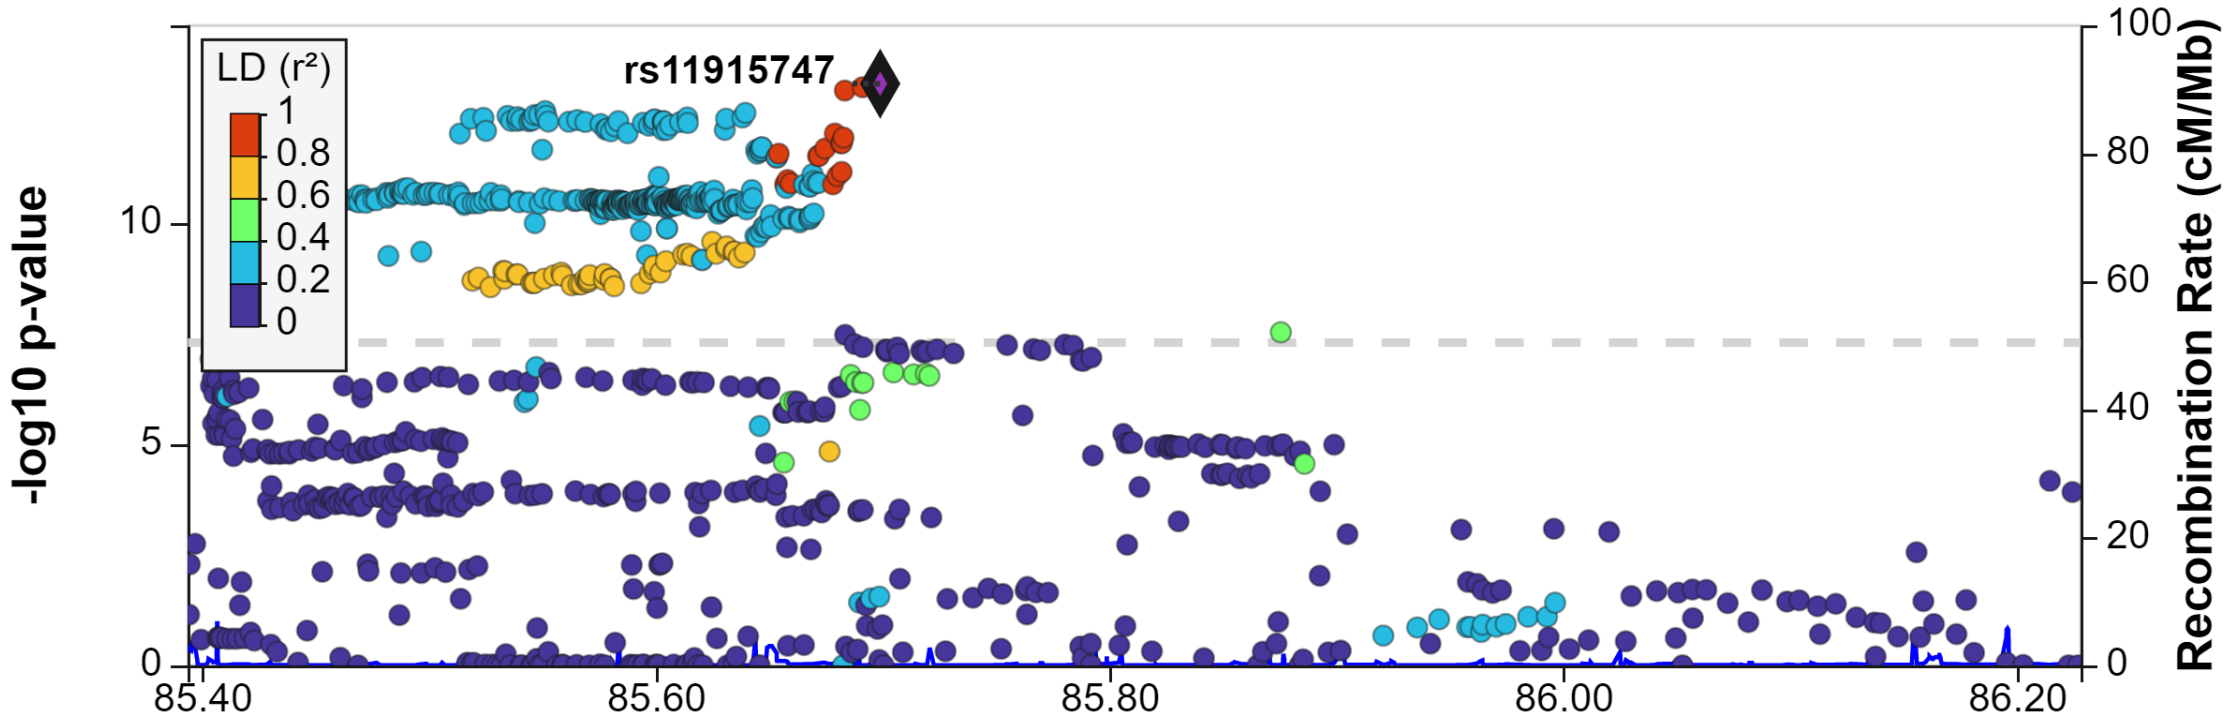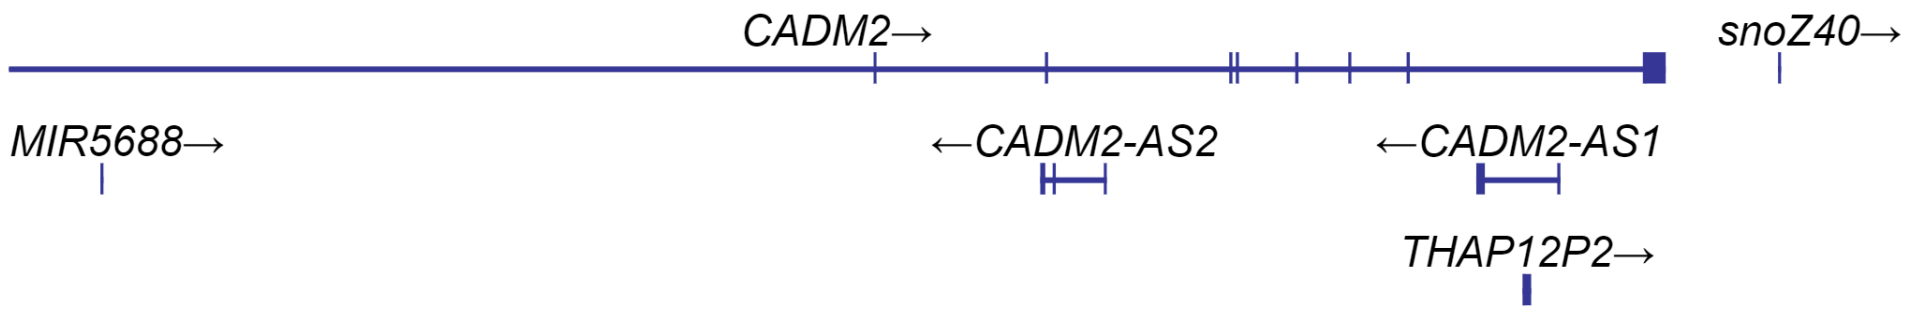

# ADHDxCUD GWAS

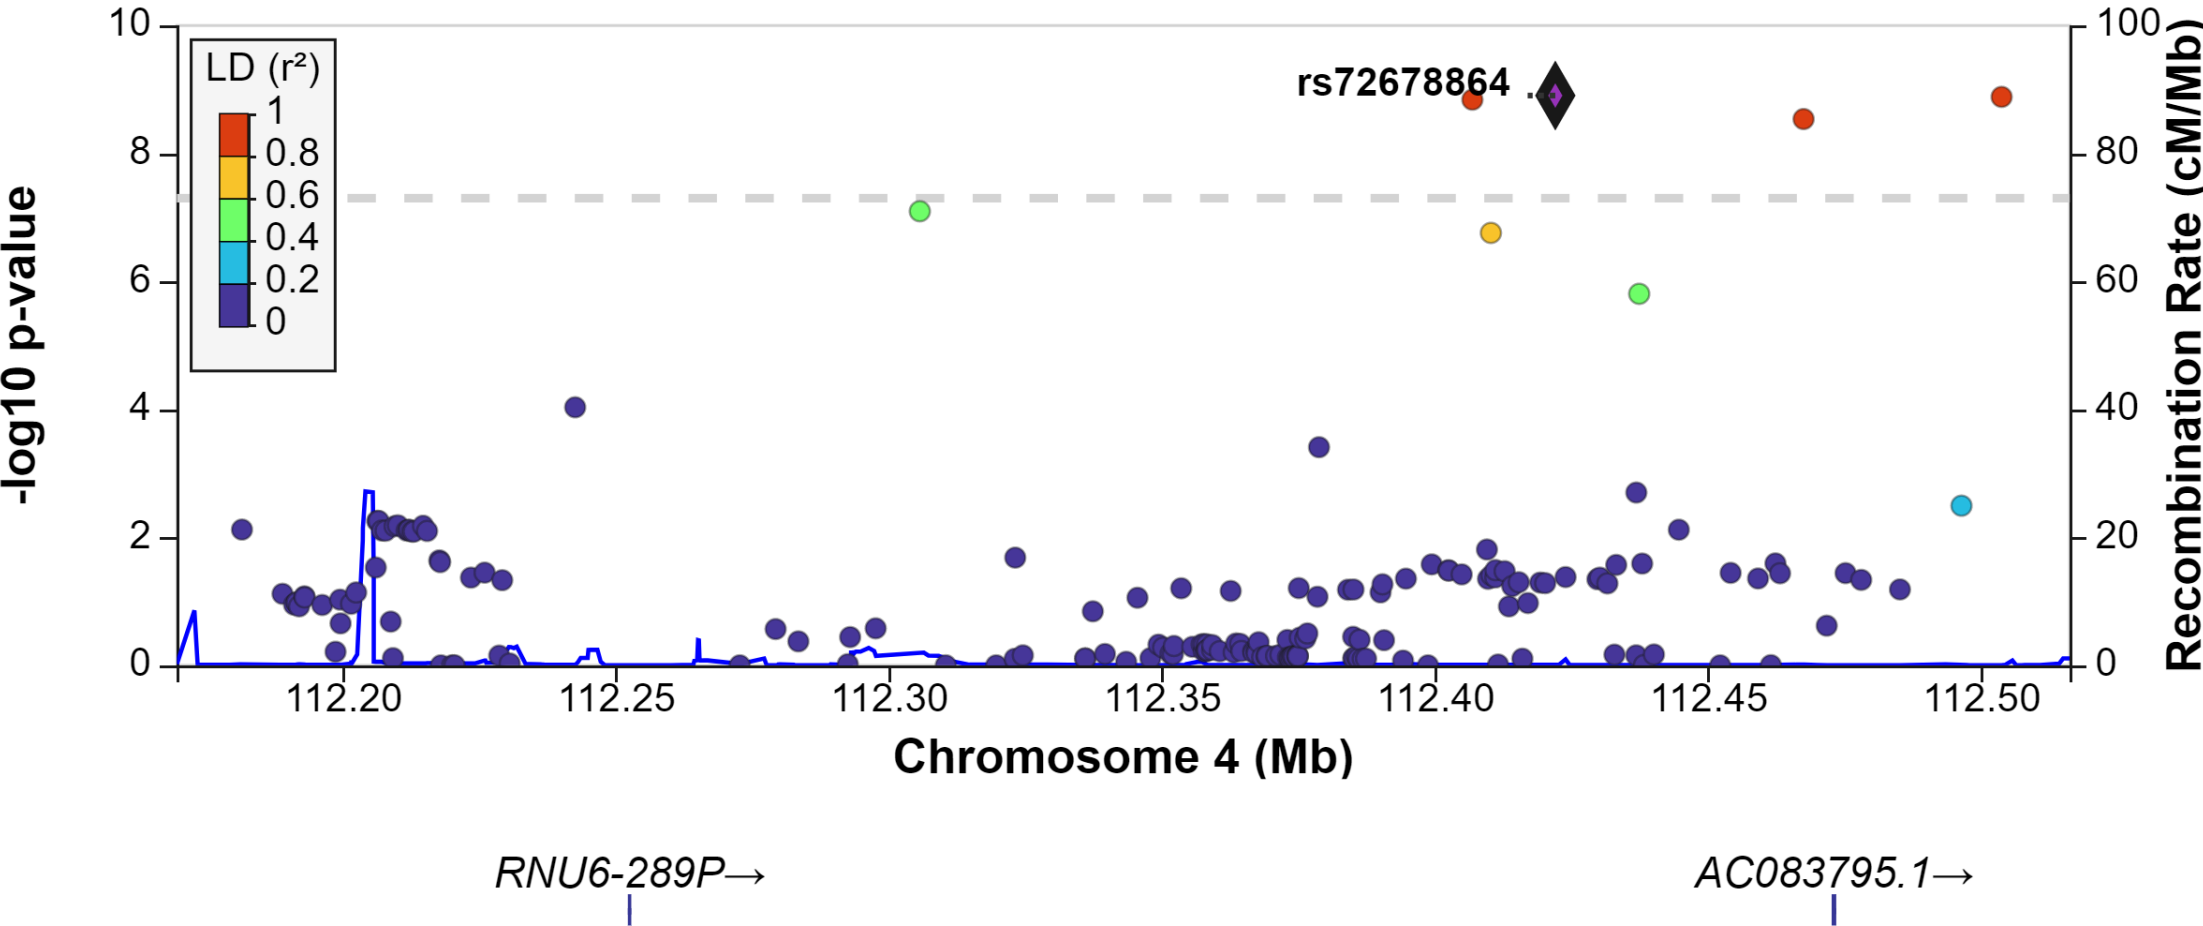

# ADHDxCUD GWAS

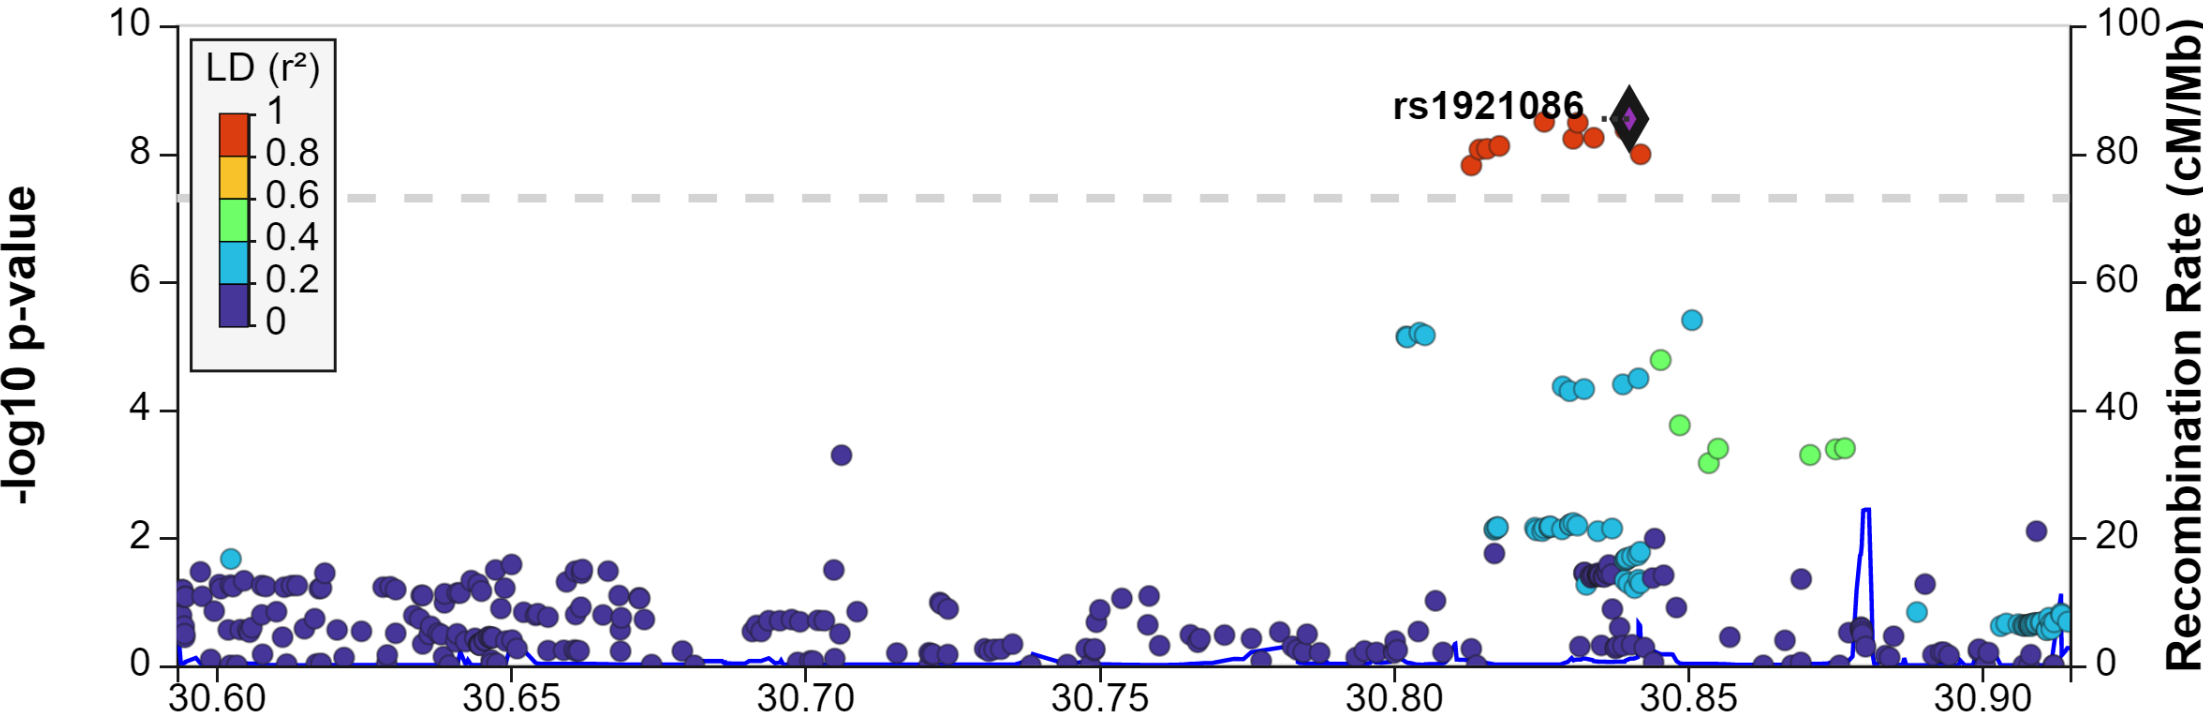

←AC099517.1

←AC026433.1

# ADHDxCUD GWAS

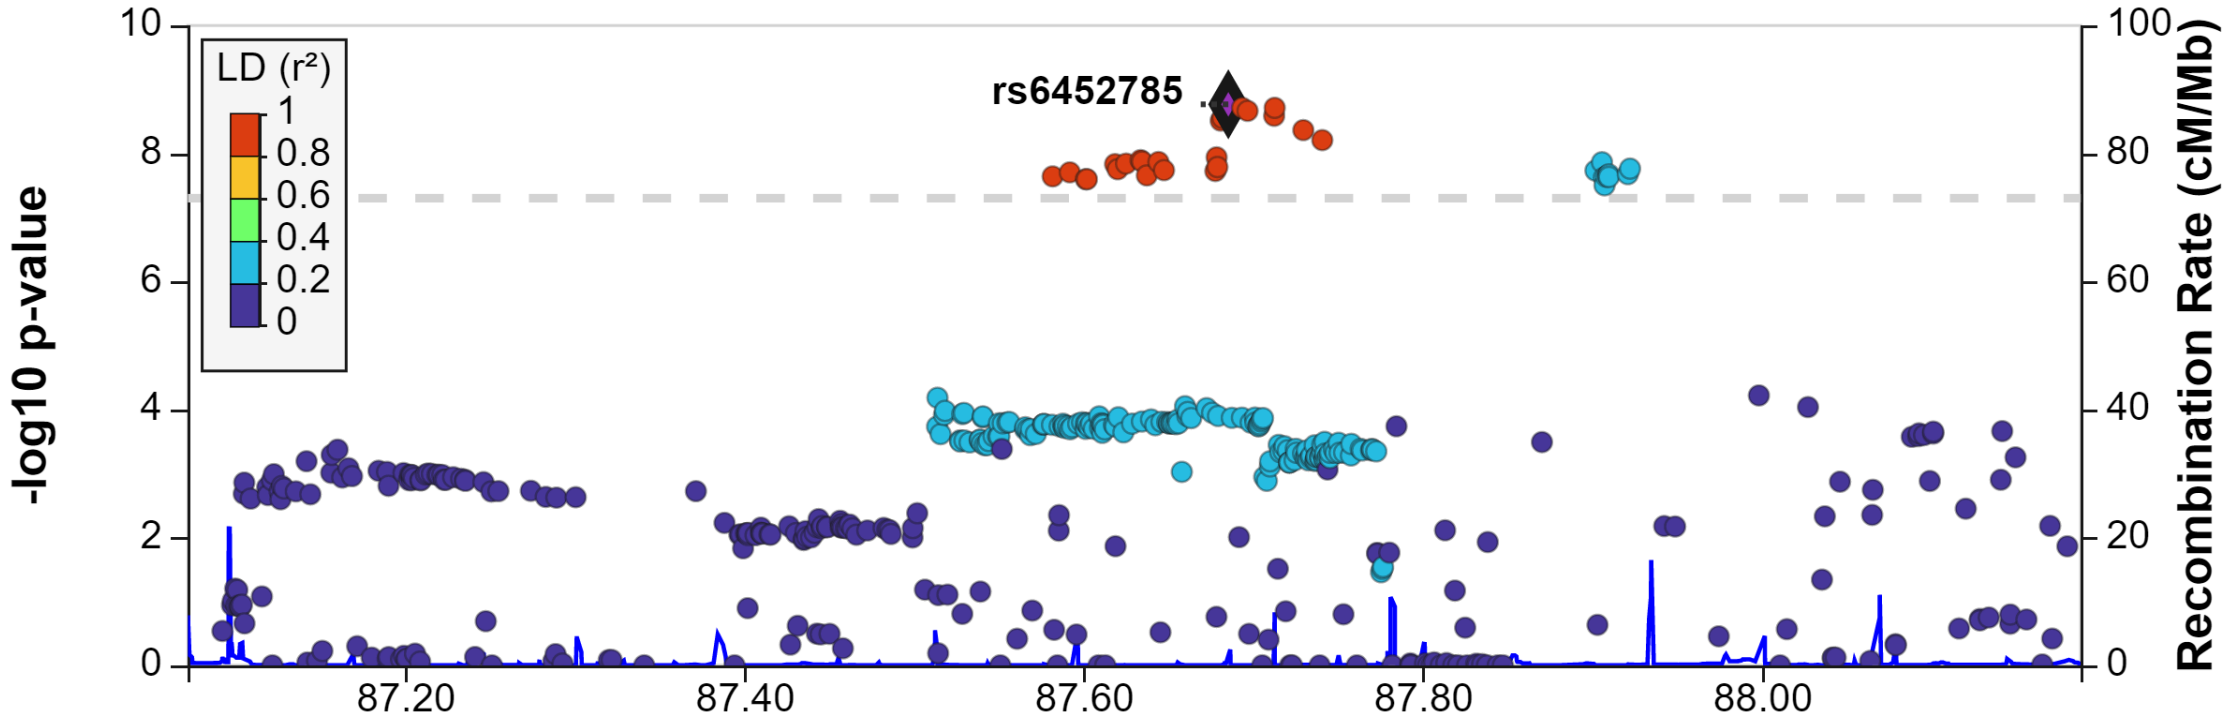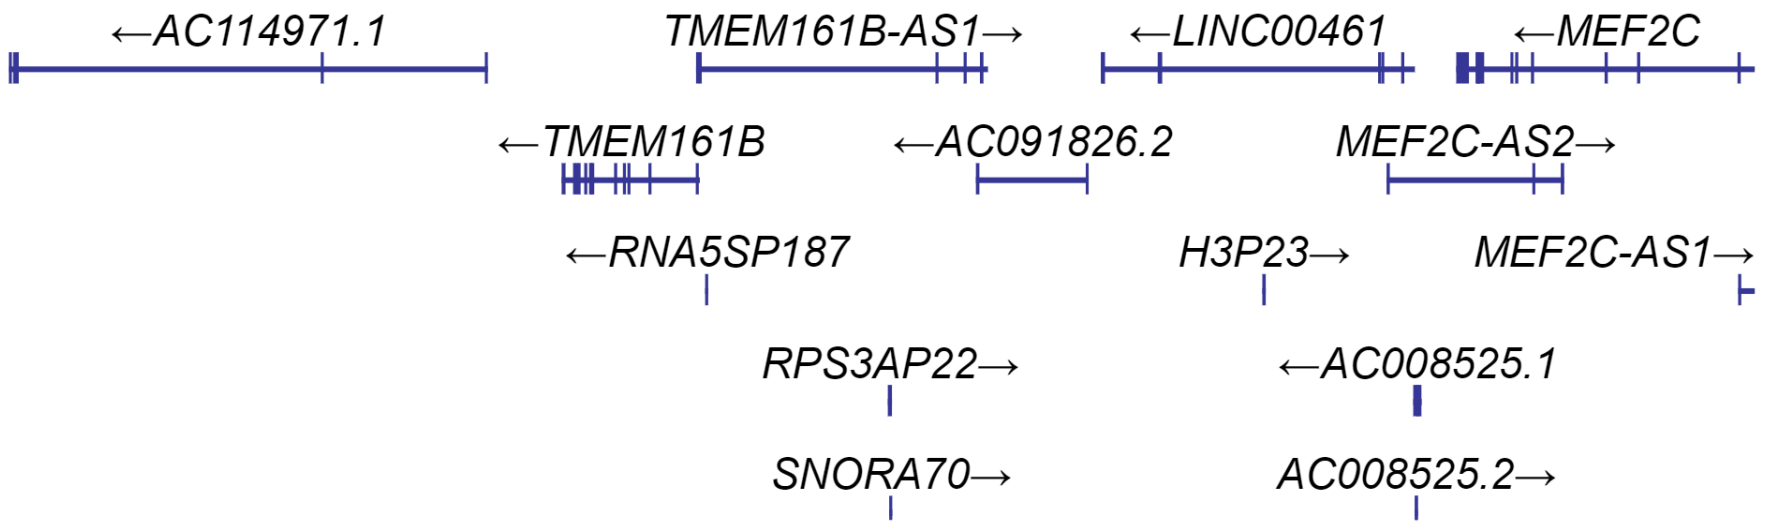

# ADHDxCUD GWAS

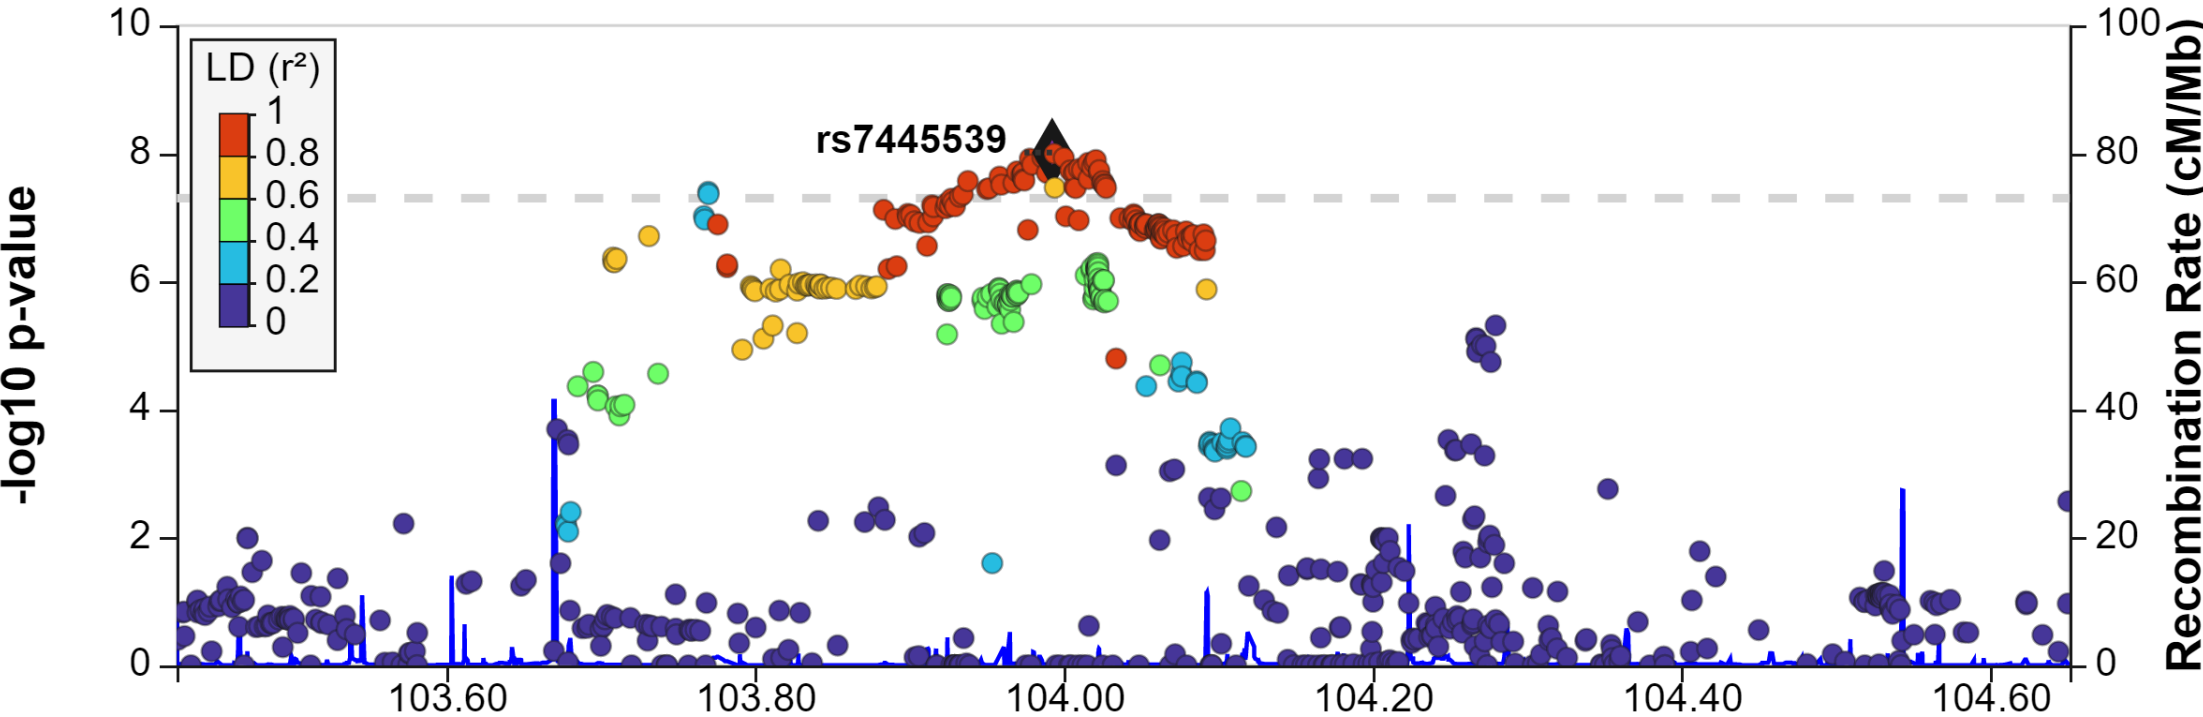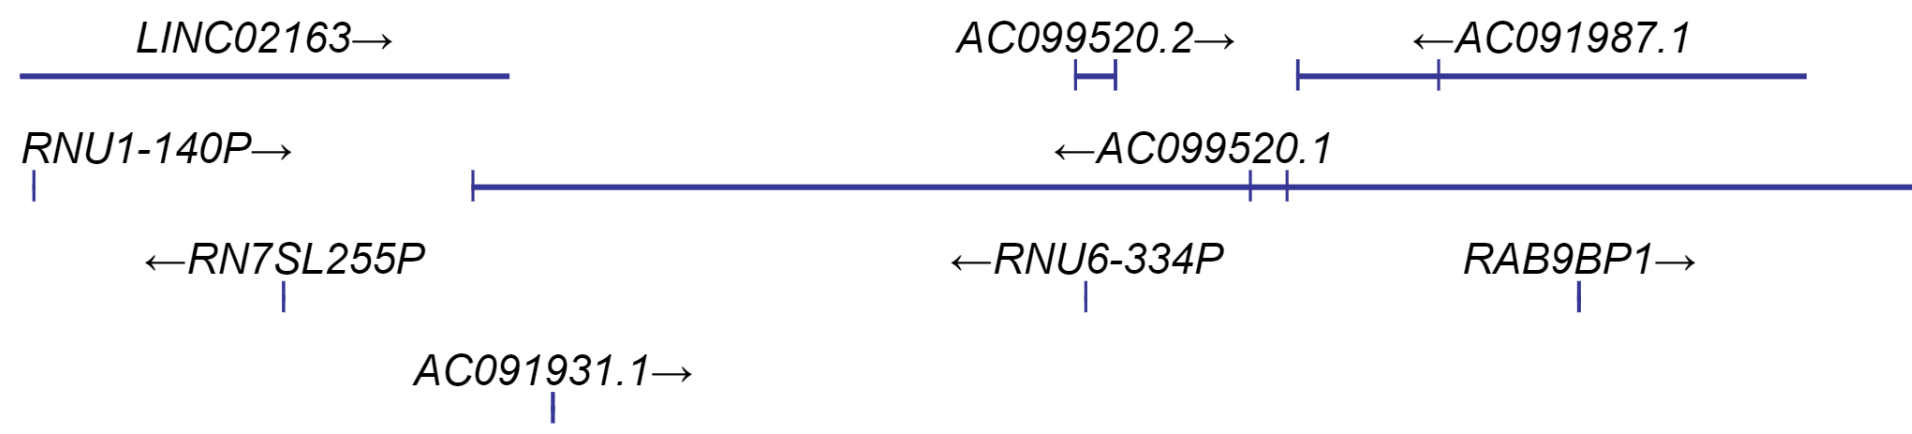

# ADHDxCDU GWAS

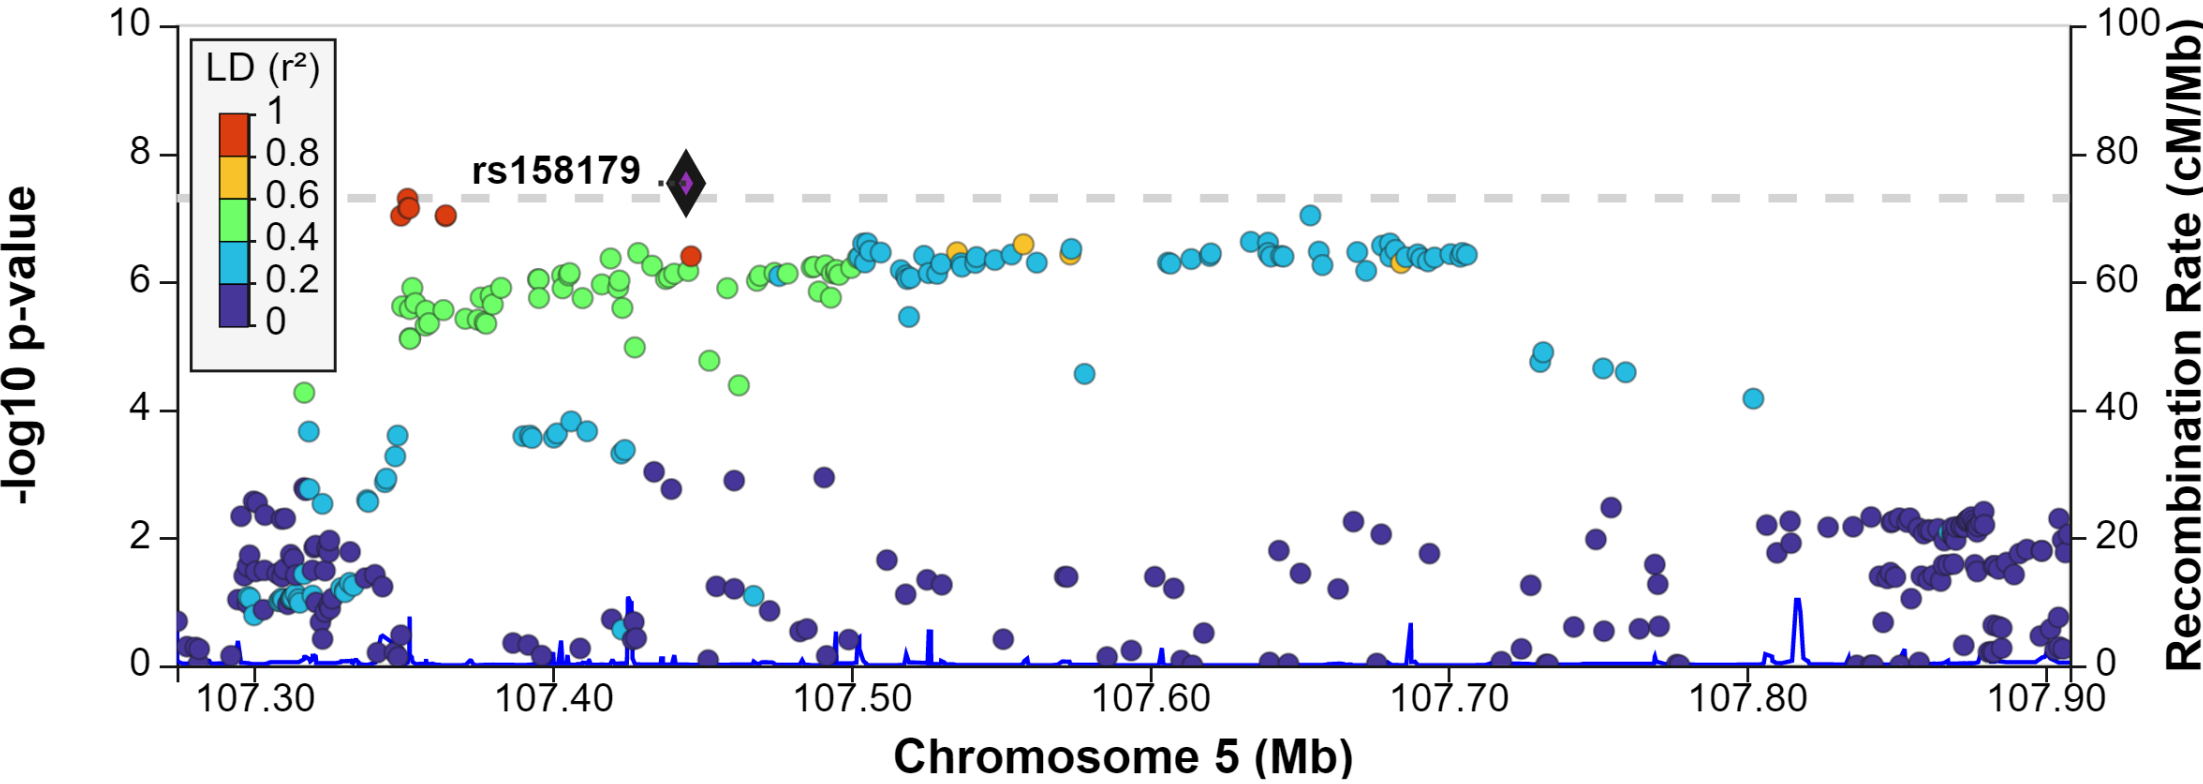

← *FBXL17*

*AC008462.1* →

# ADHDxCUD GWAS

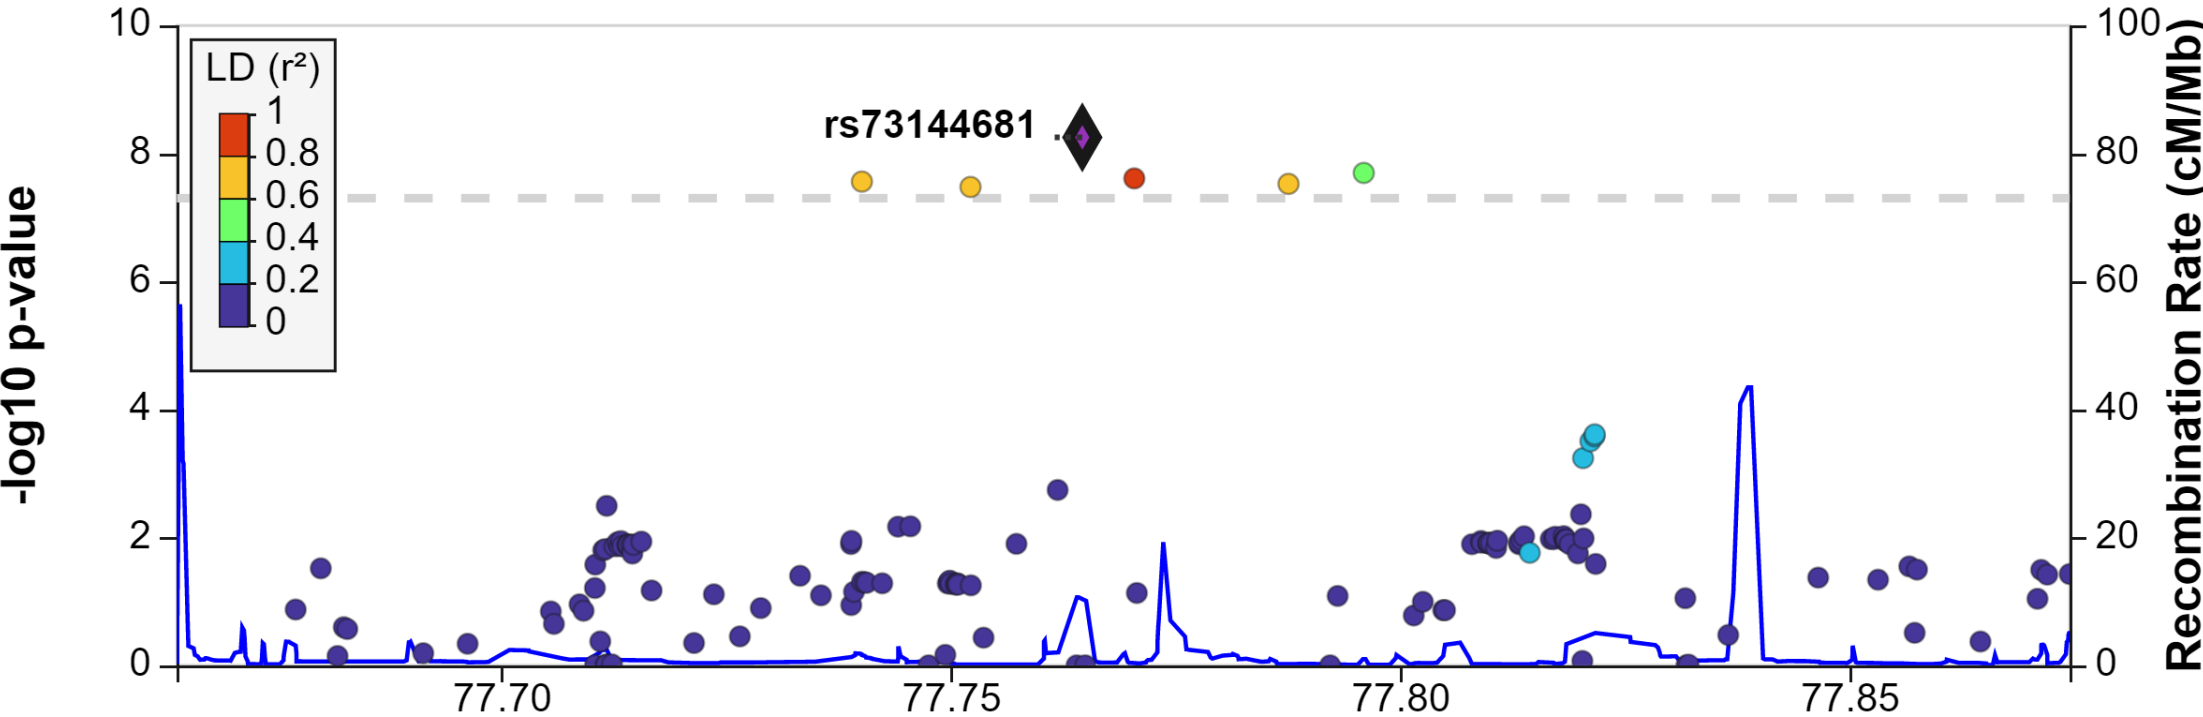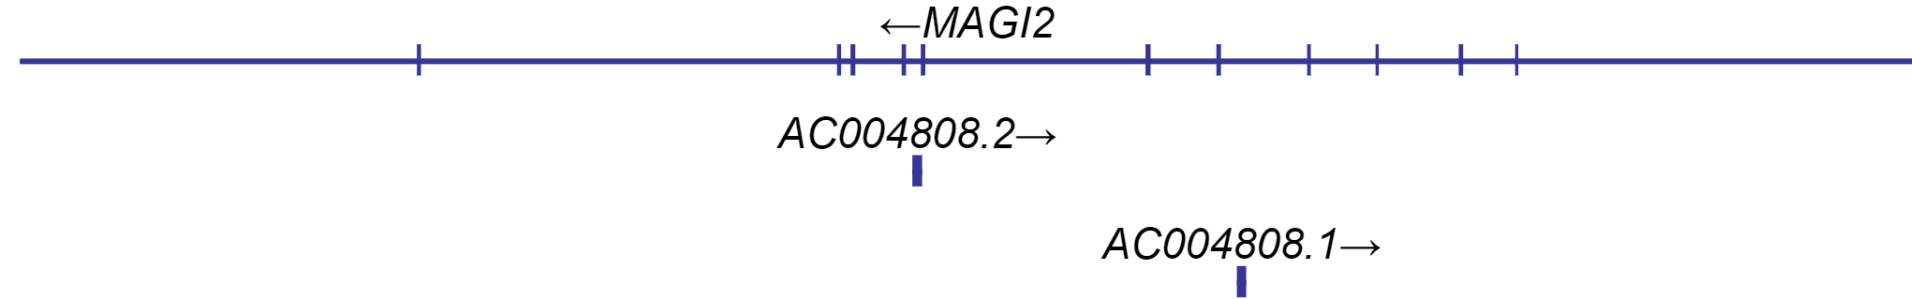

# ADHDxCUD GWAS

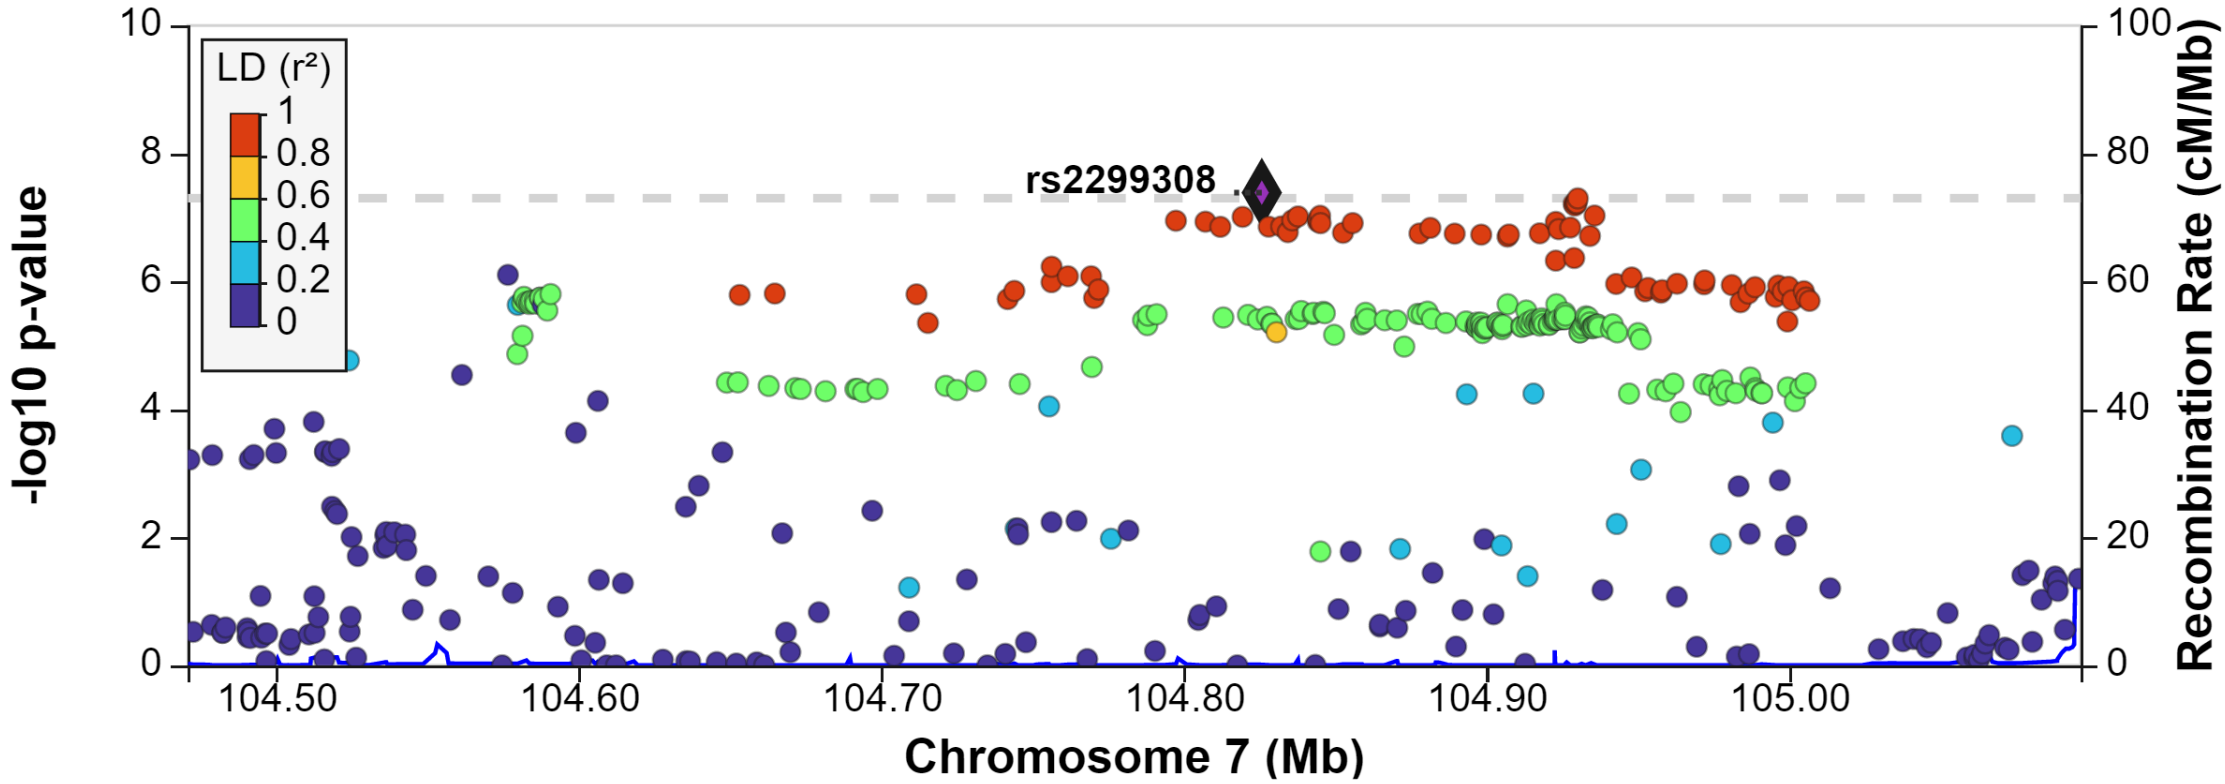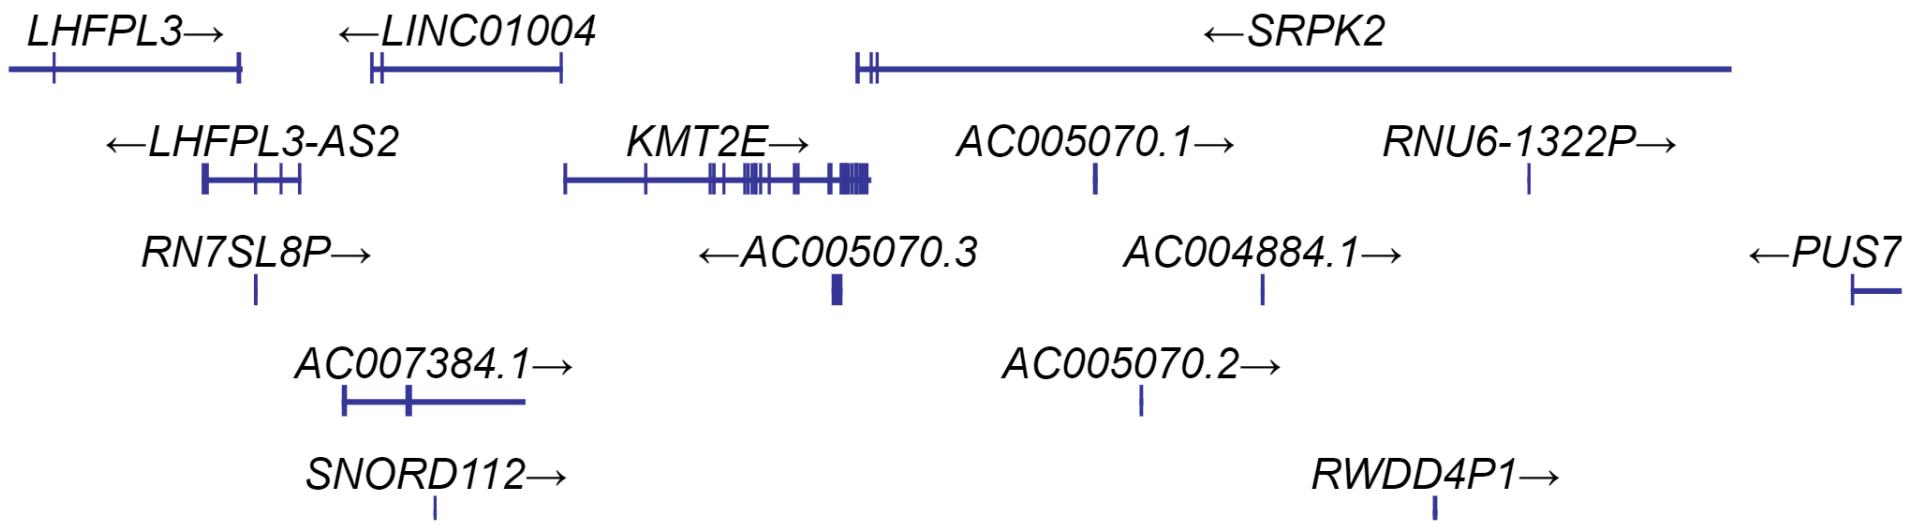



# ADHDxCUD GWAS

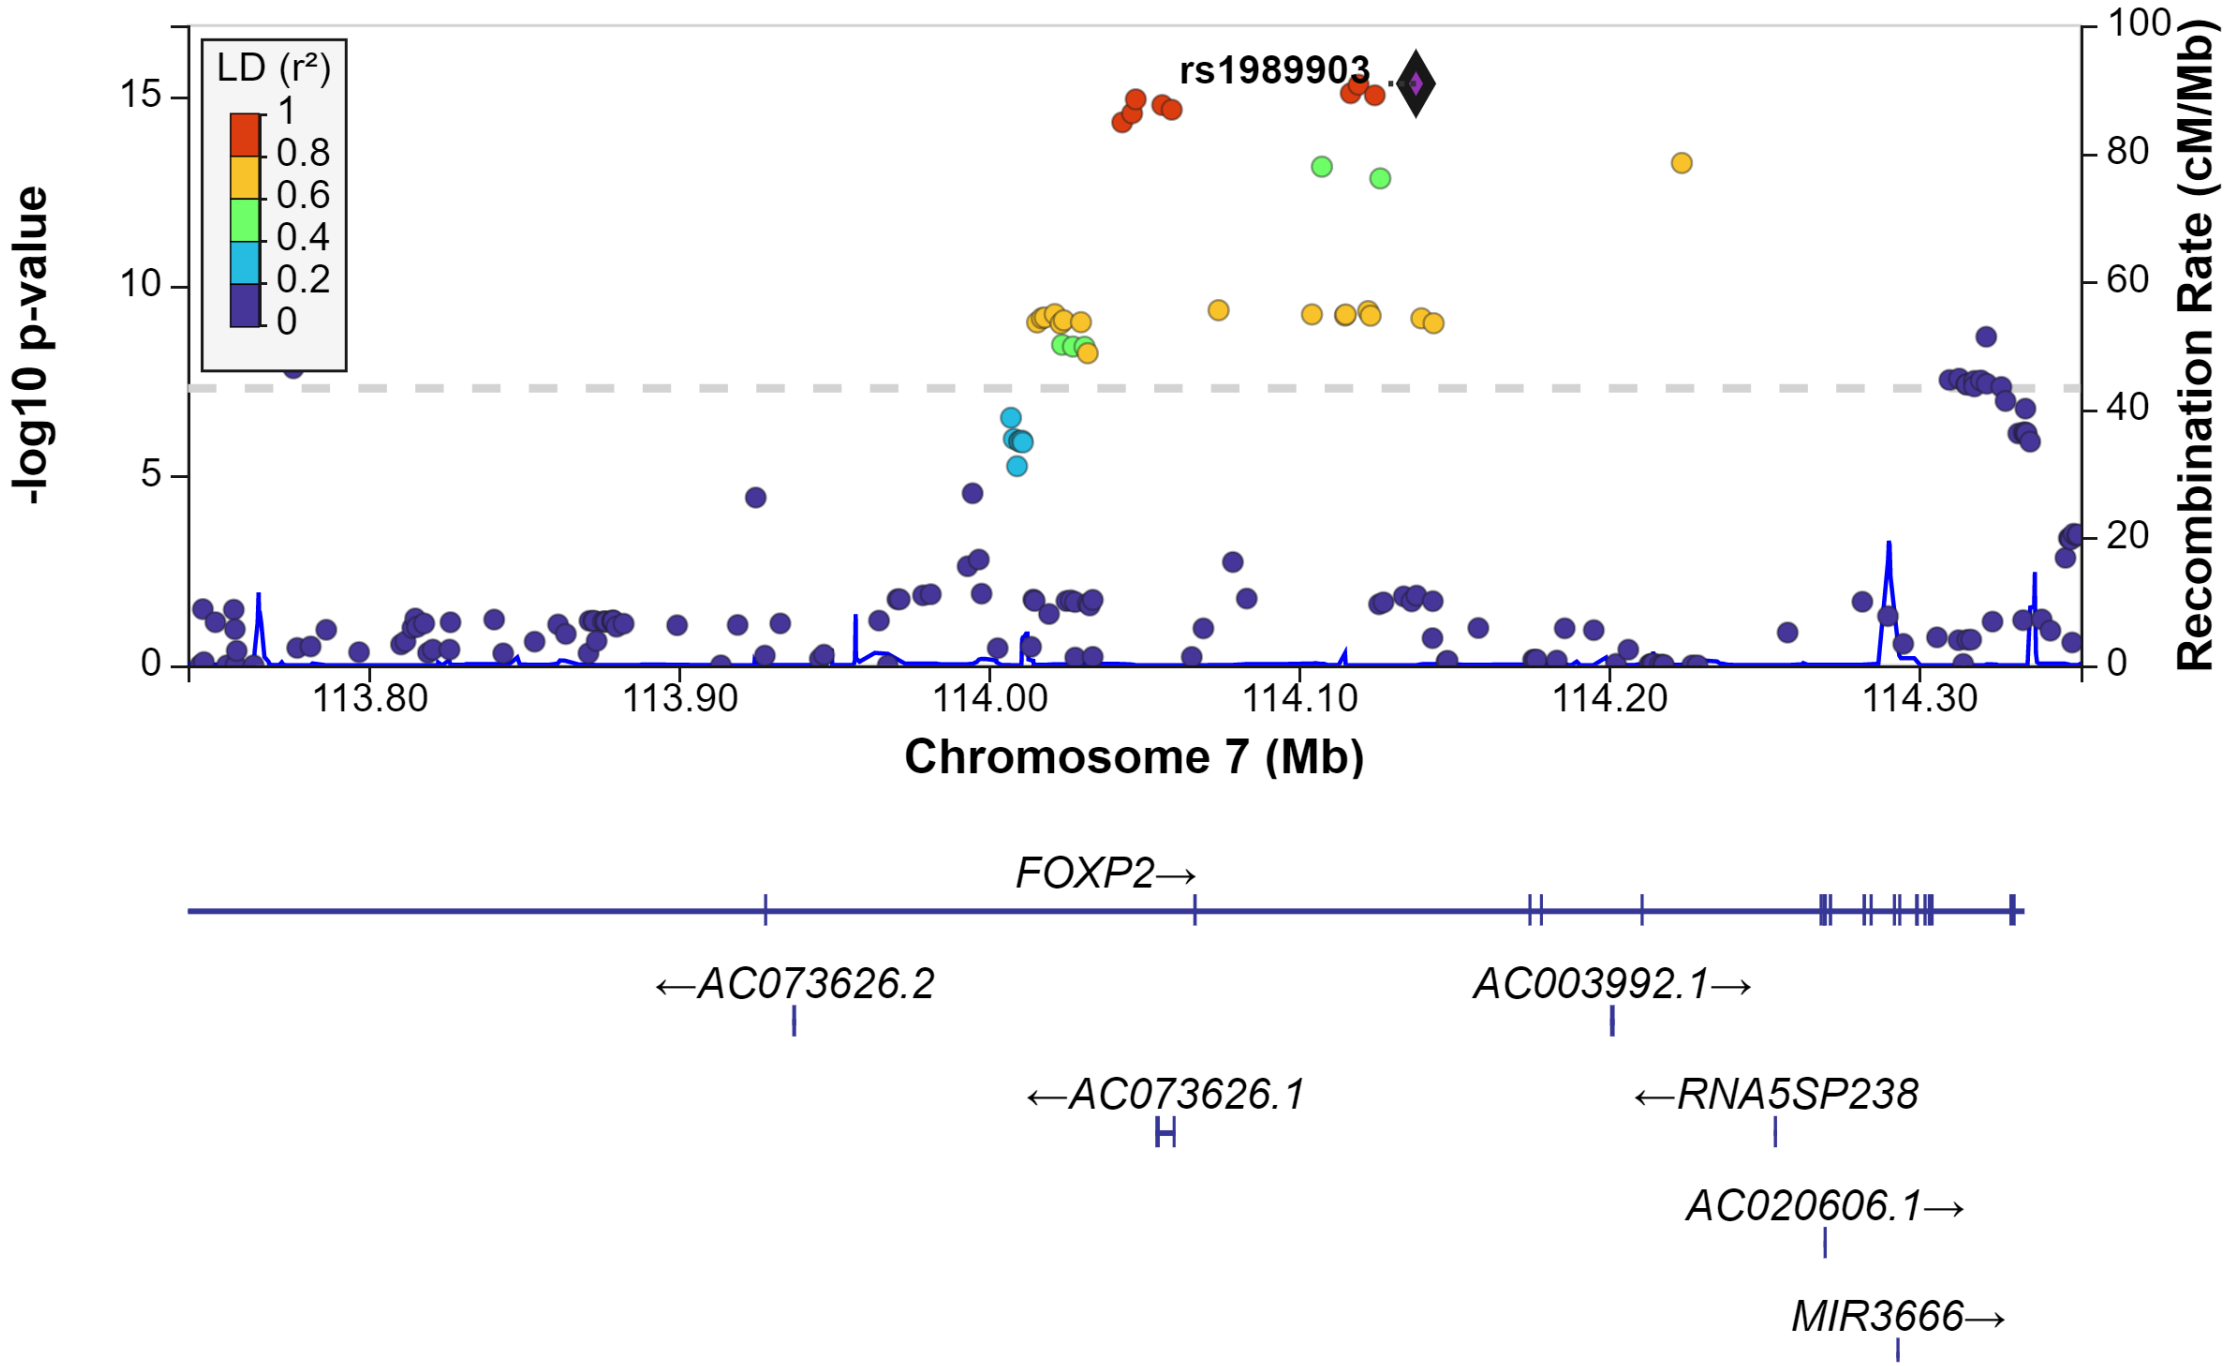

# ADHDxCUD GWAS

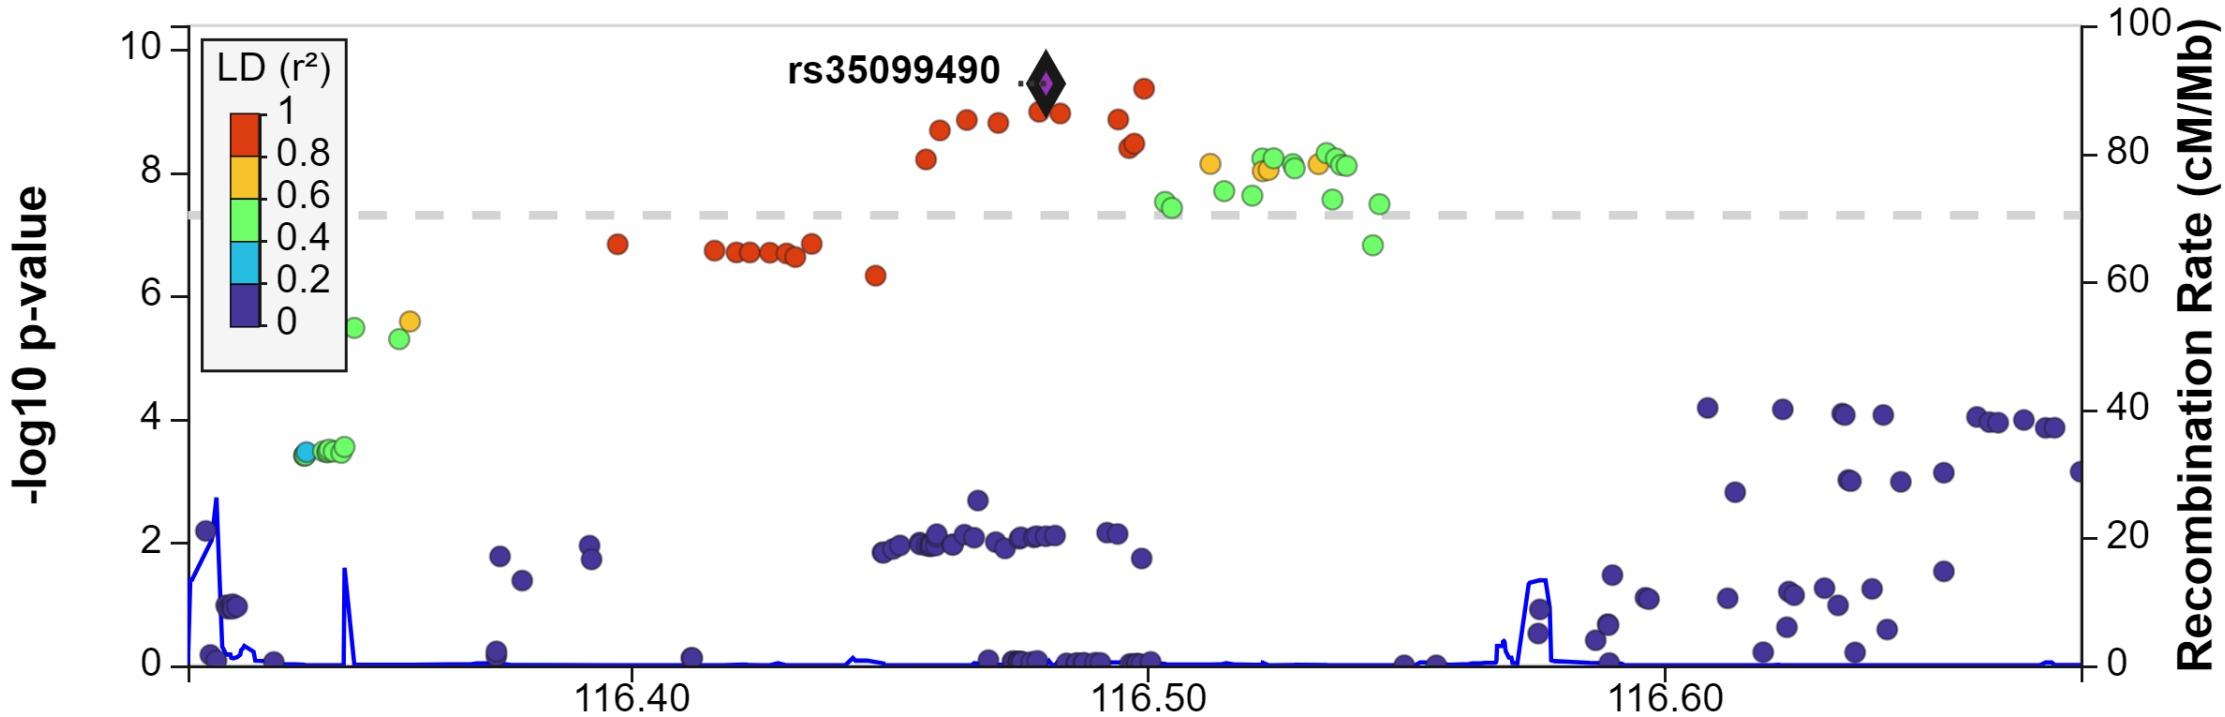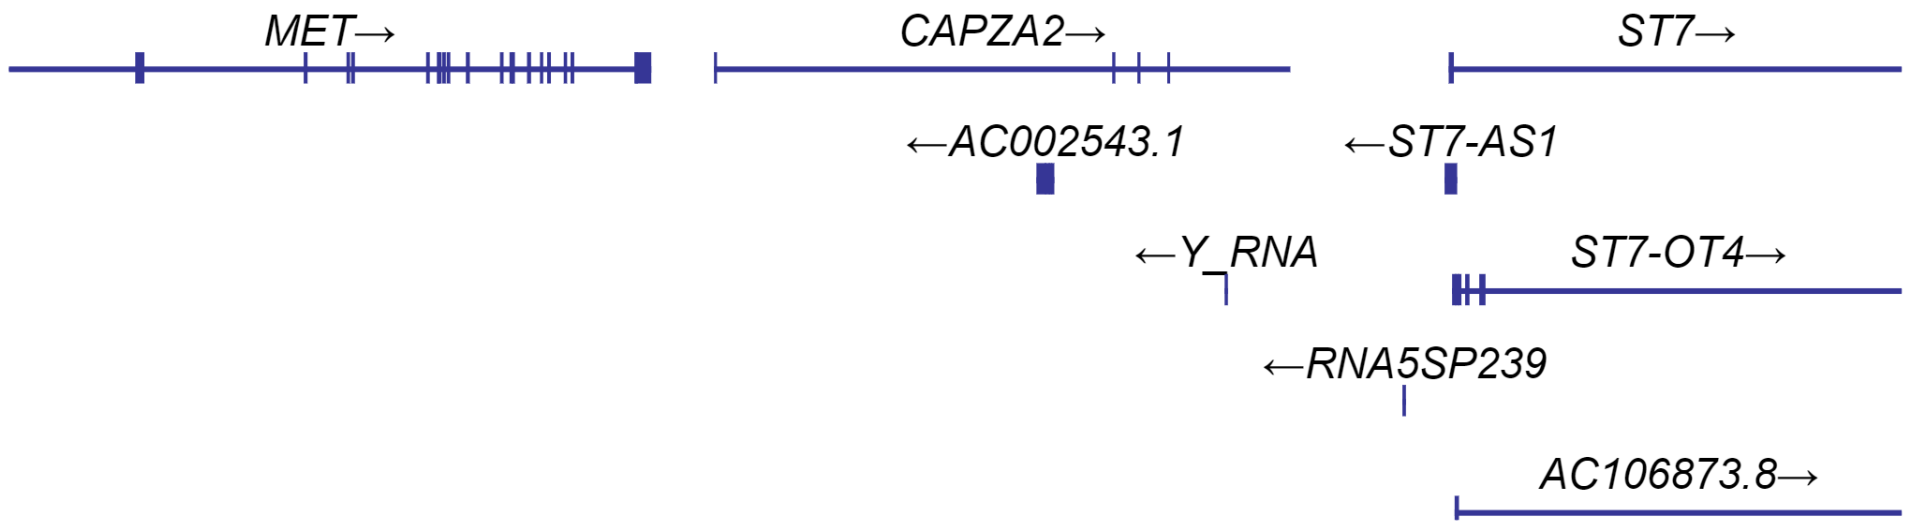

# ADHDxCUD GWAS

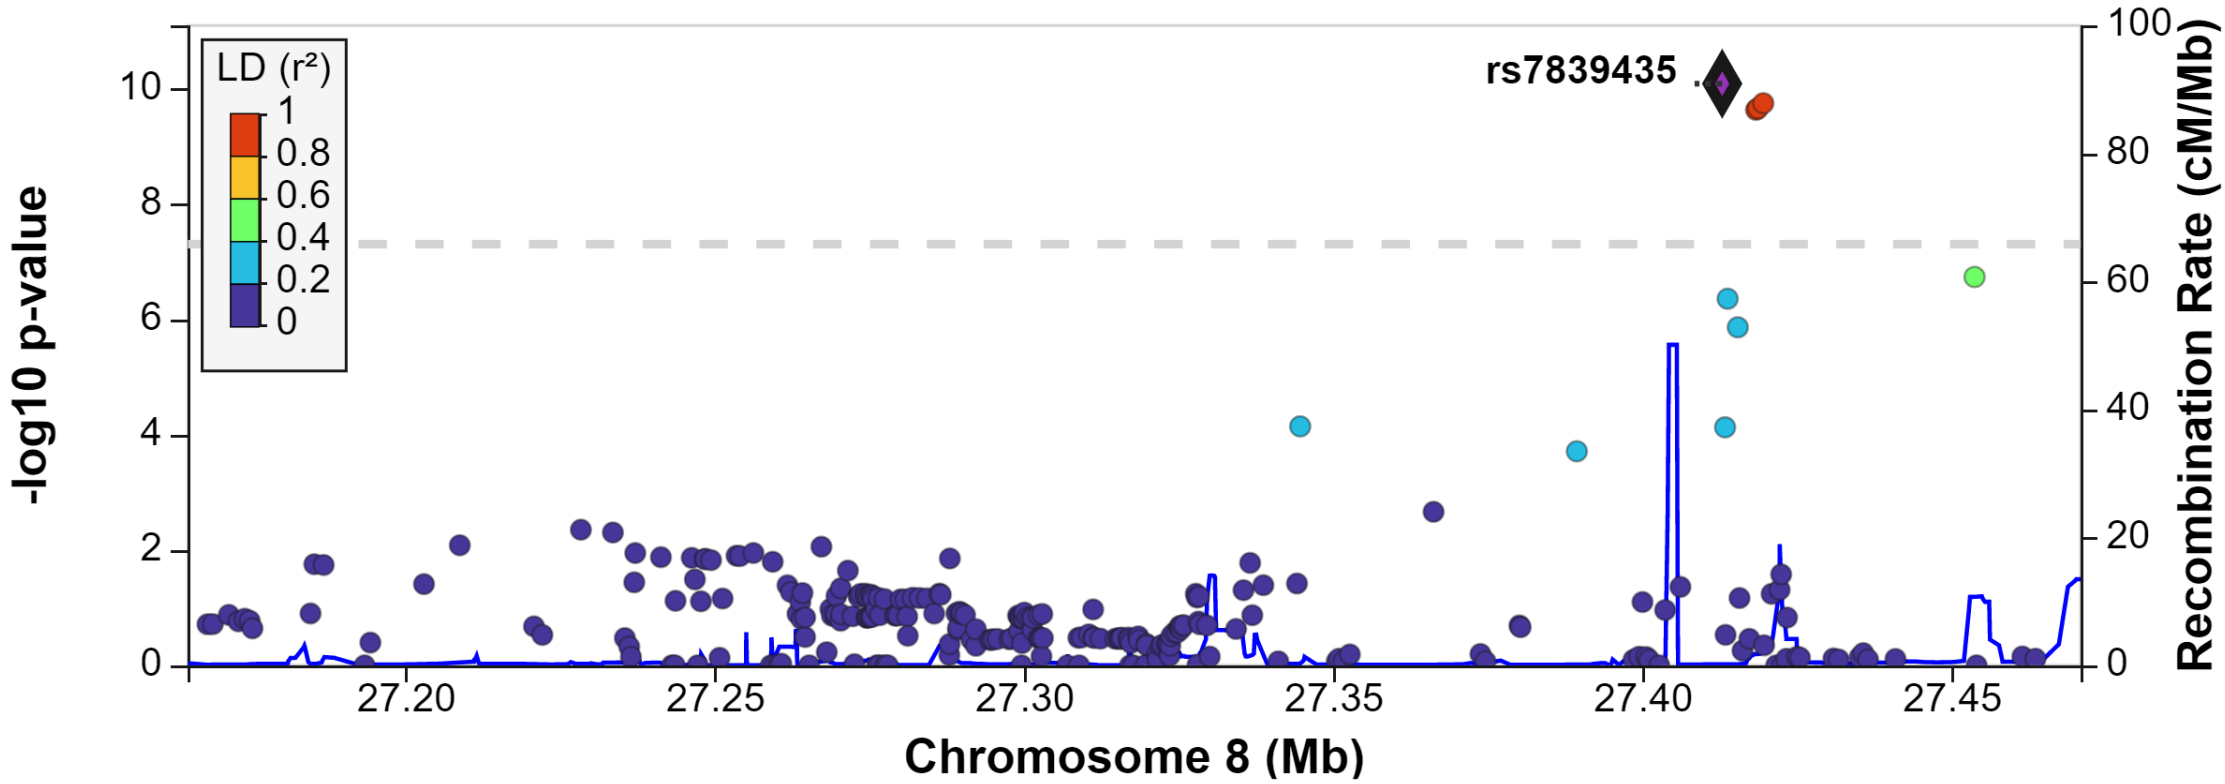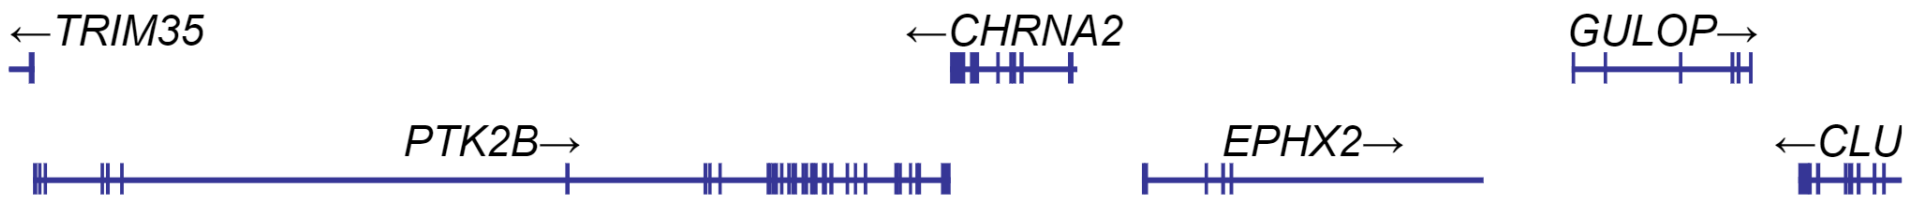

# ADHDxCUD GWAS

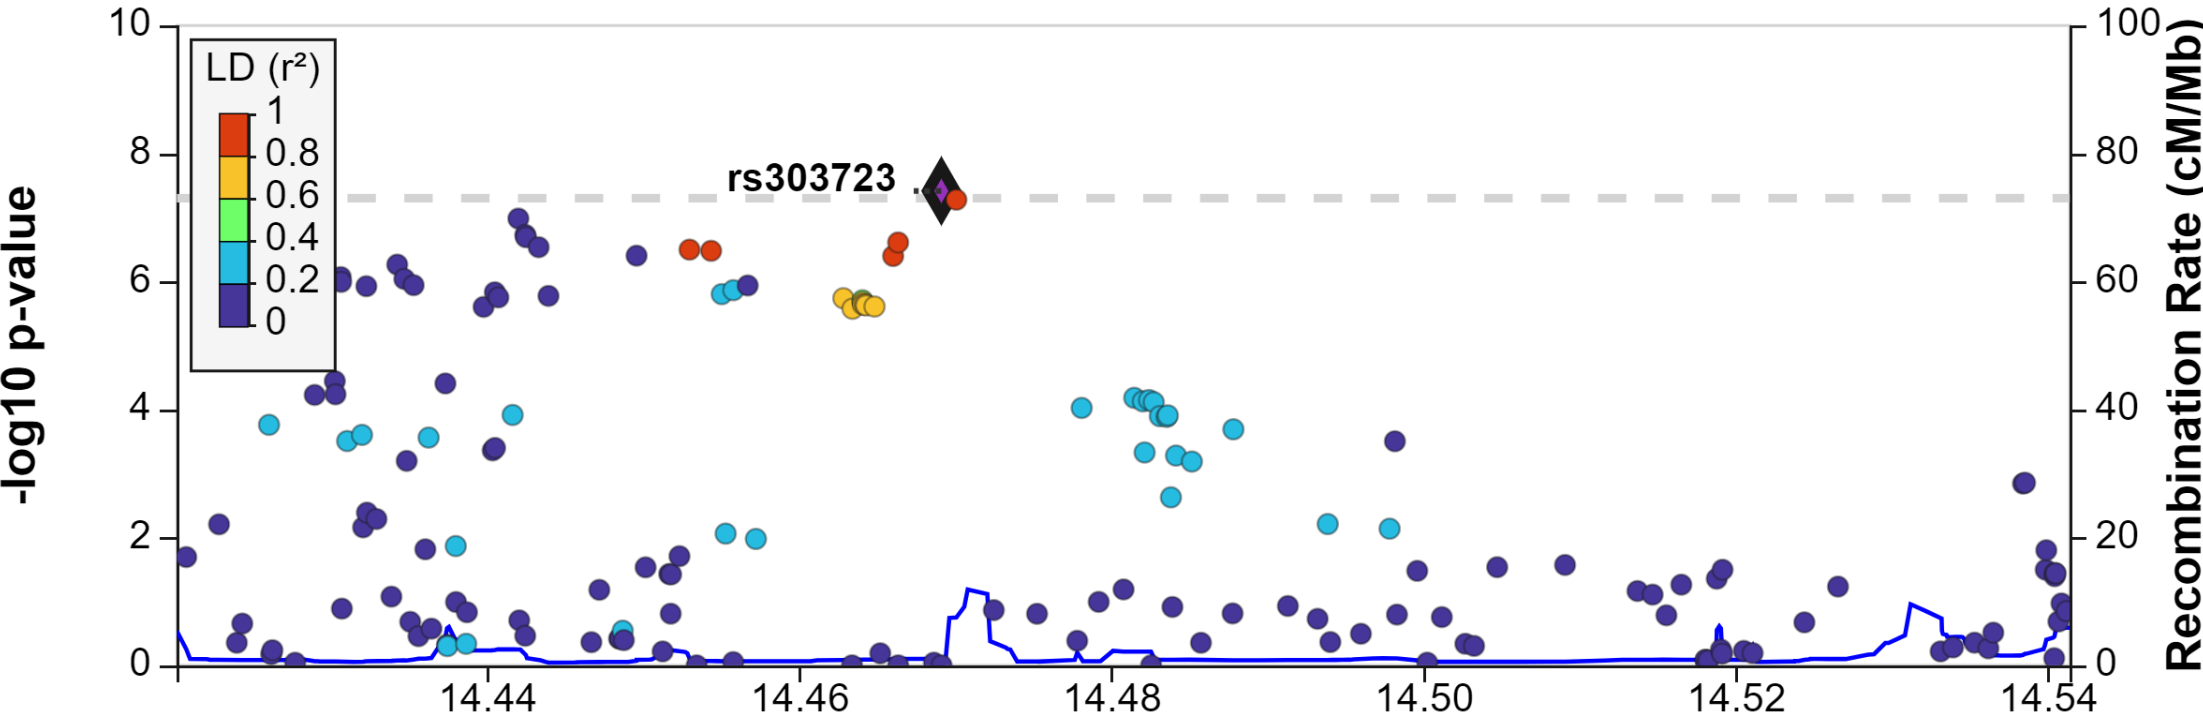

*AL137017.1* →

← *AL159169.1*

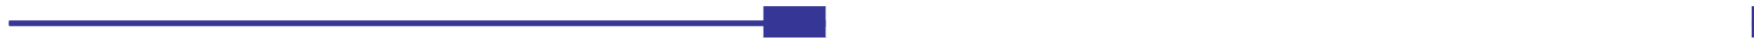

# ADHDxCUD GWAS

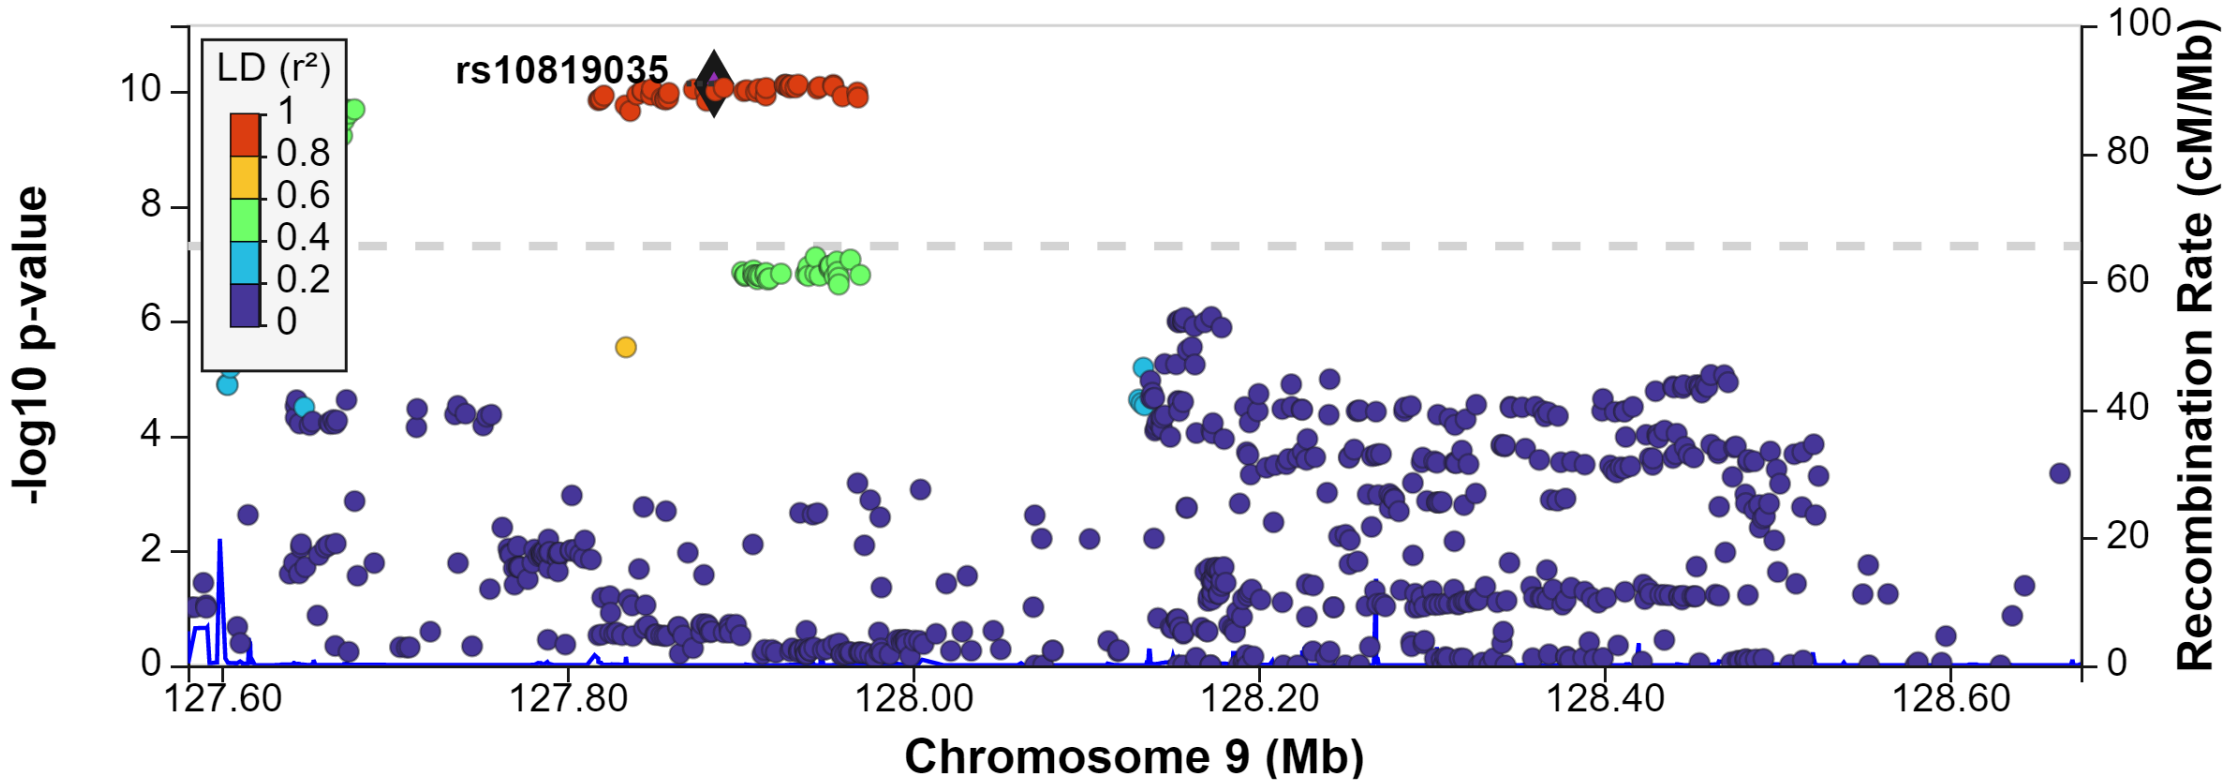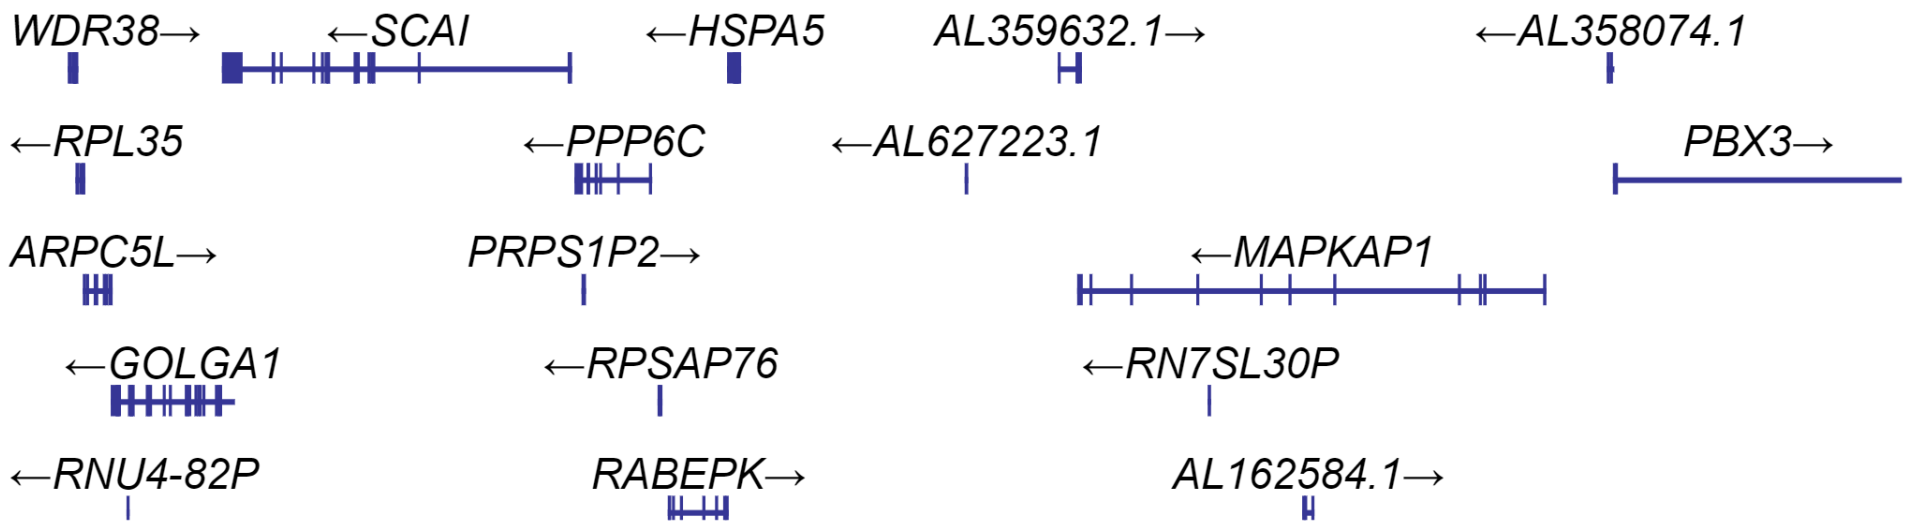

# ADHDxCUD GWAS

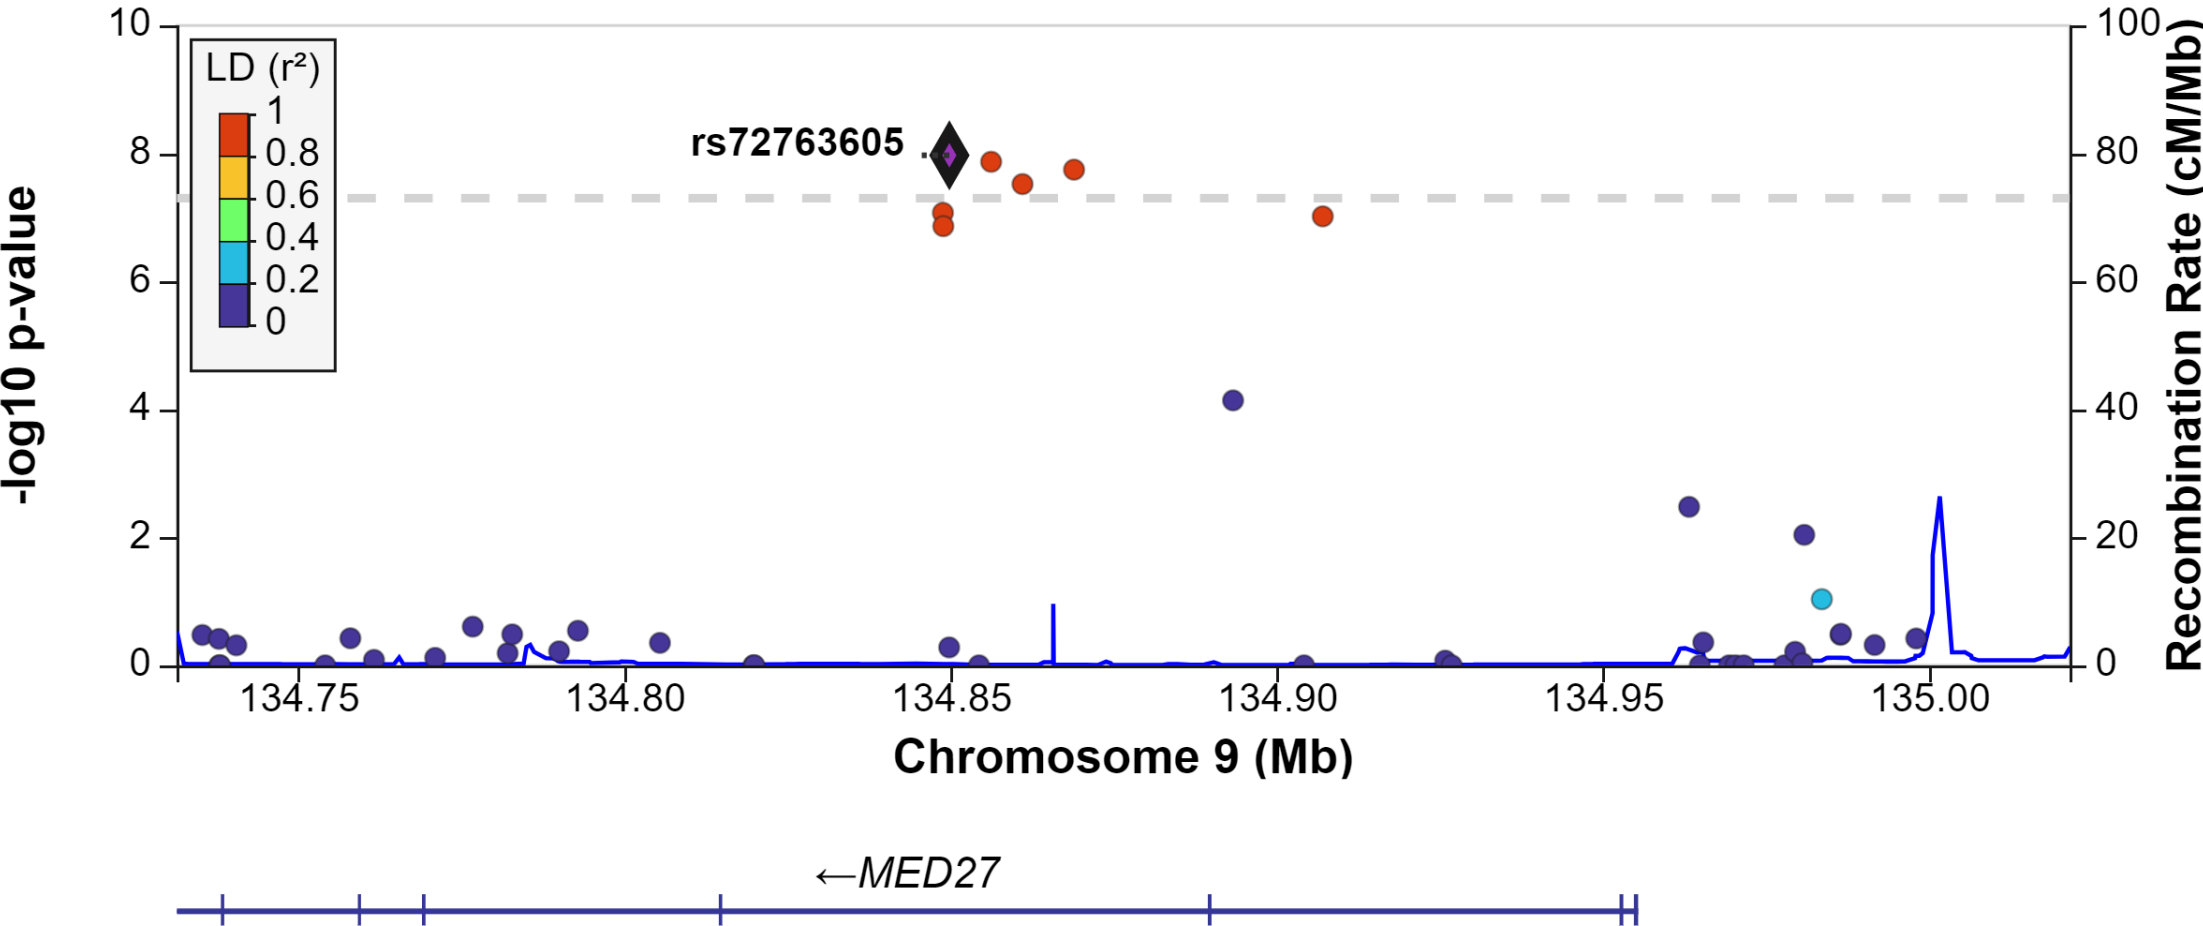

# ADHDxCUD GWAS

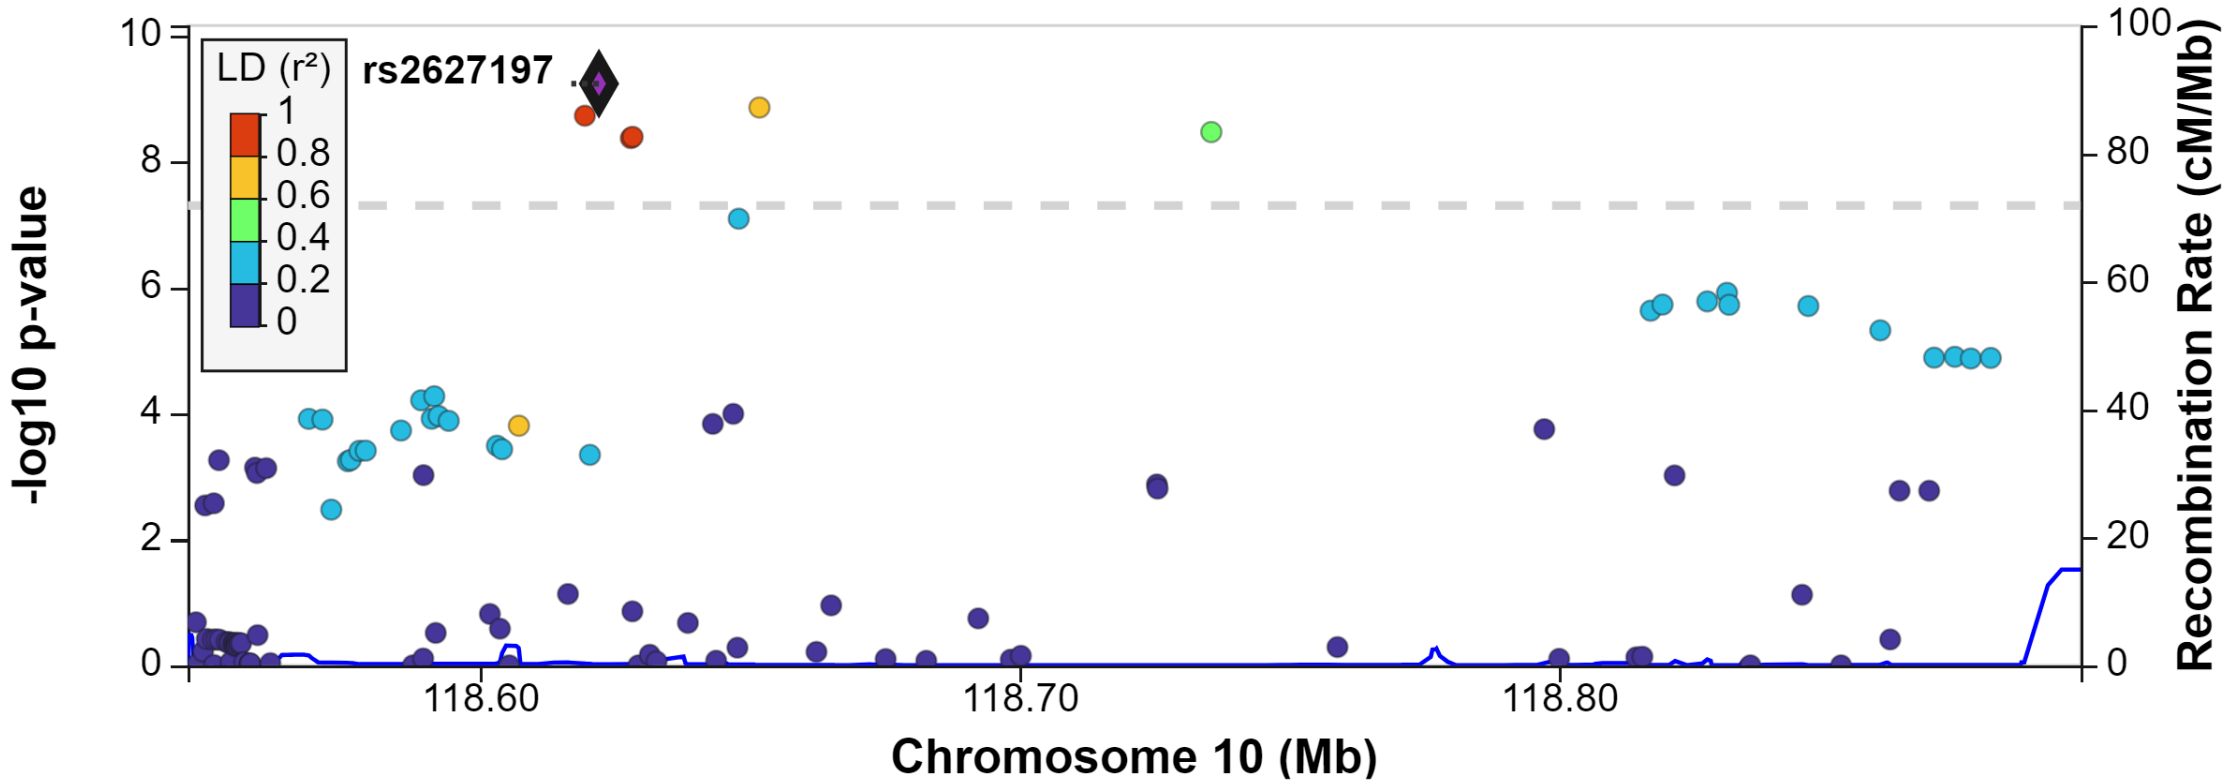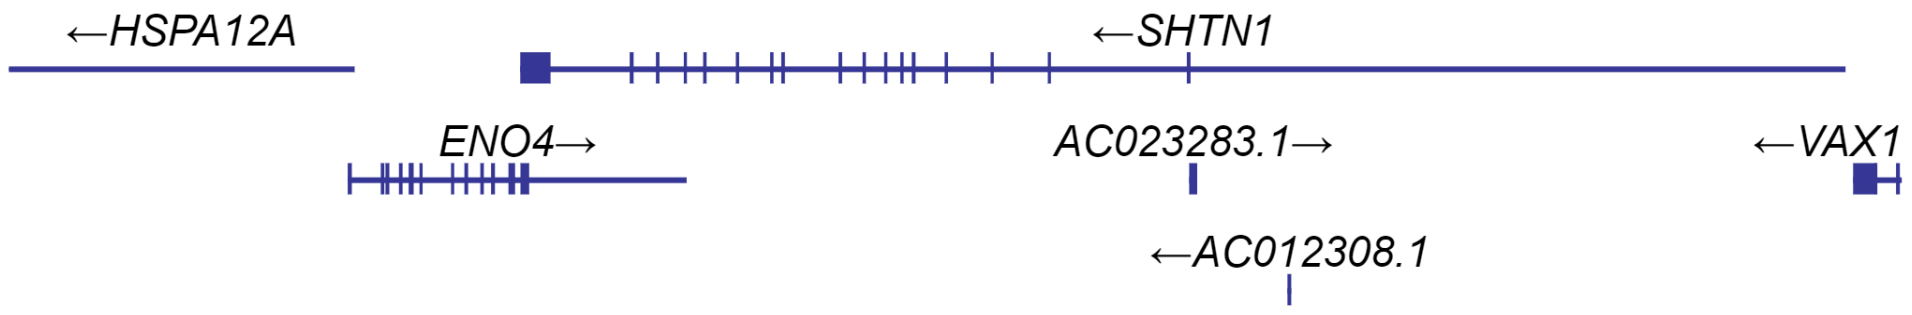

# ADHDxCUD GWAS

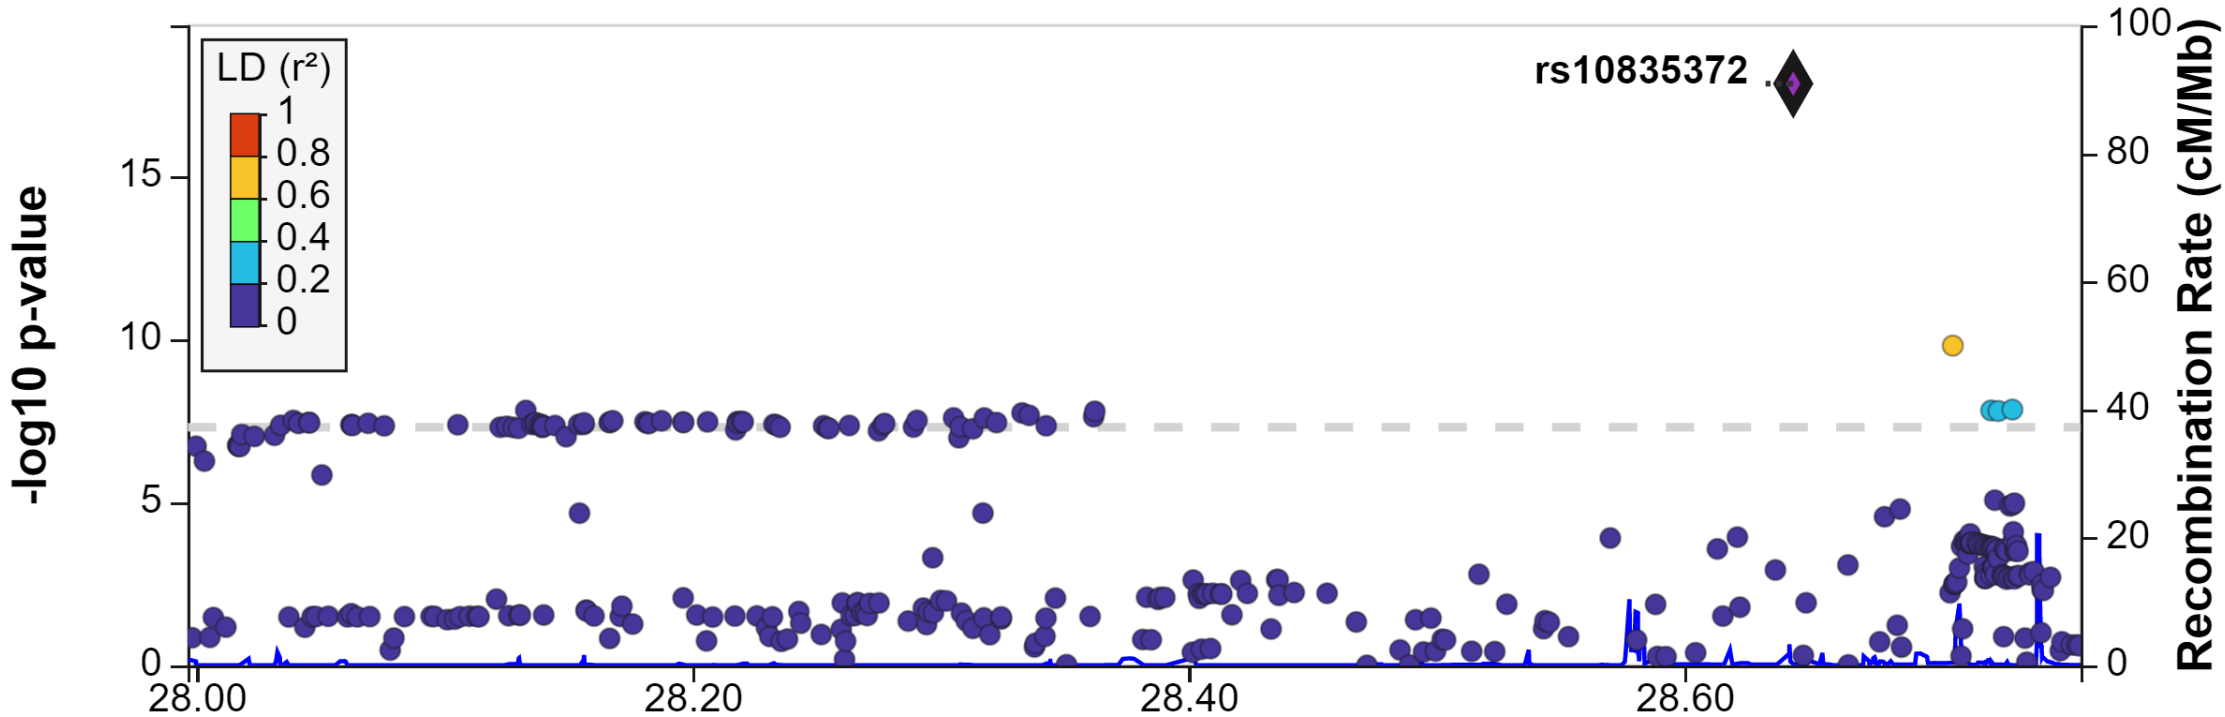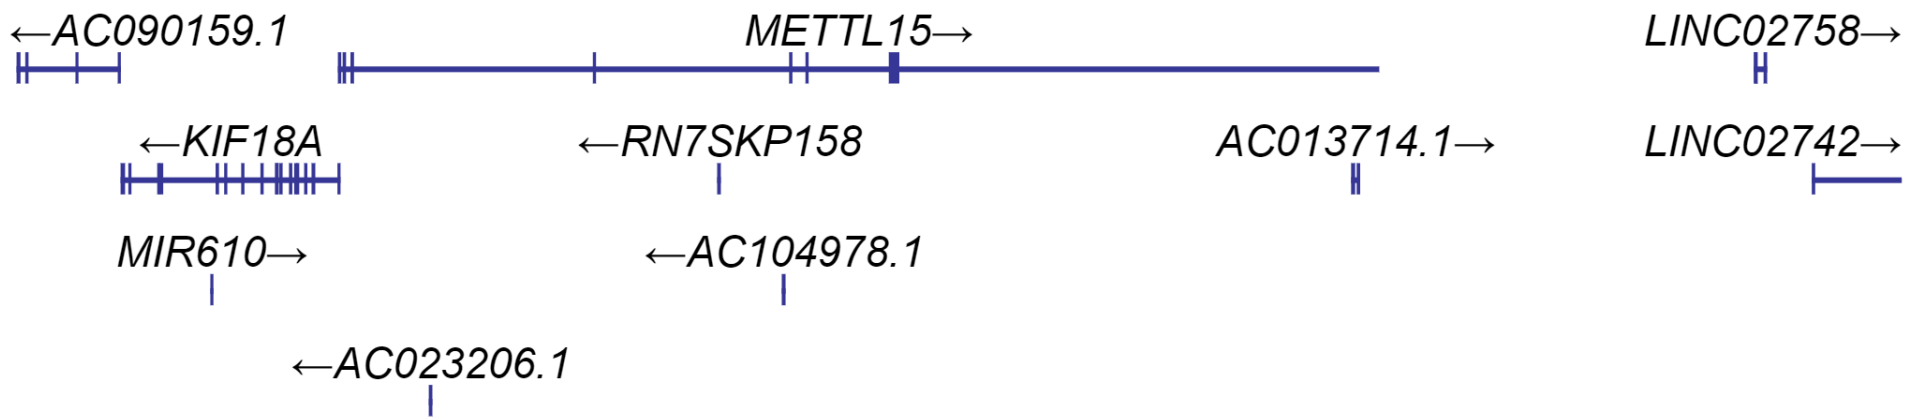



# ADHDxCUD GWAS

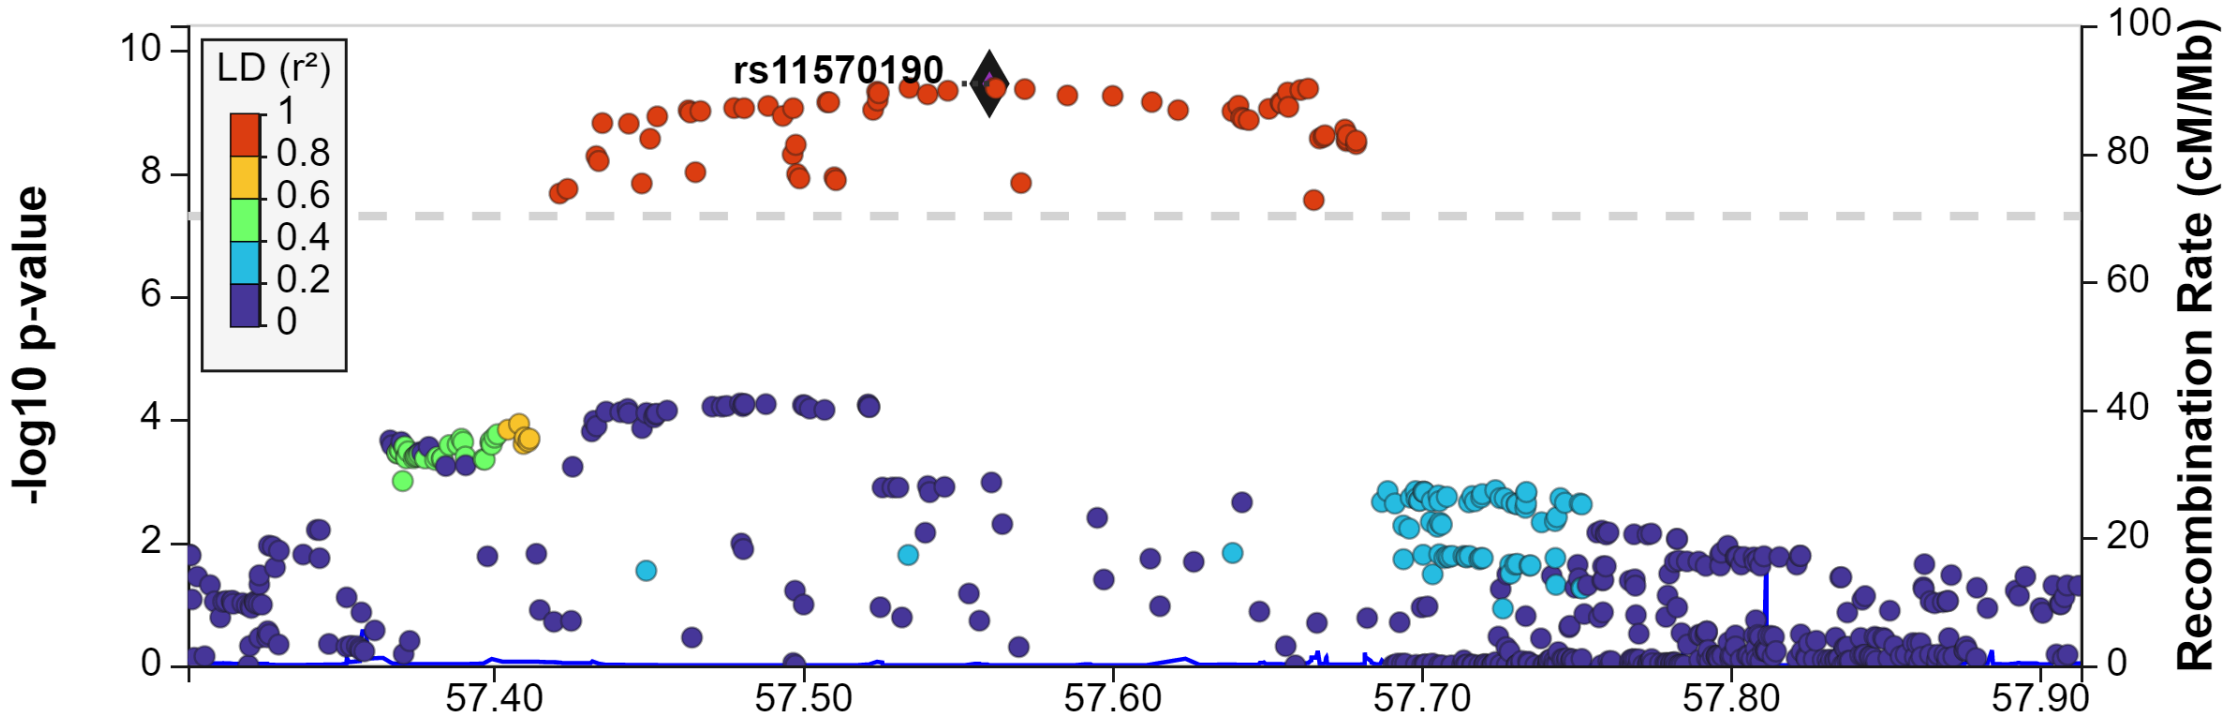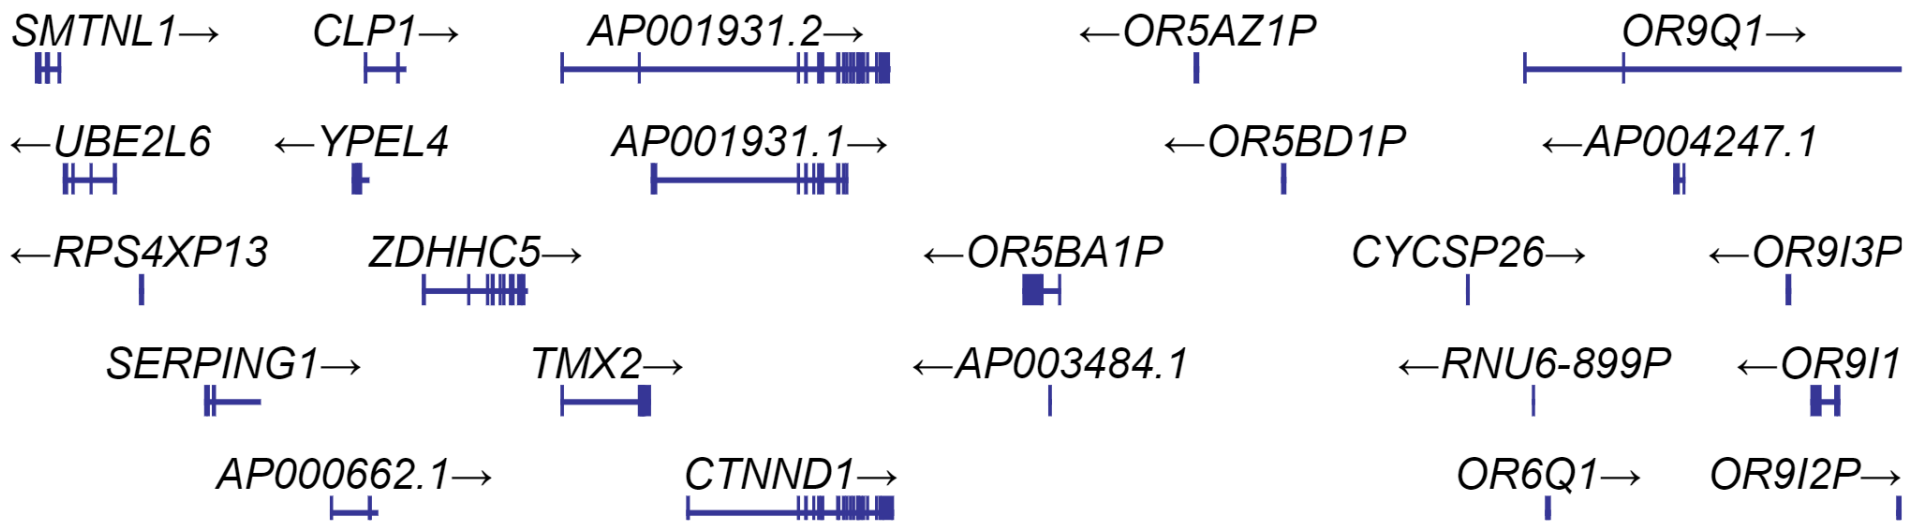

# ADHDxCUD GWAS

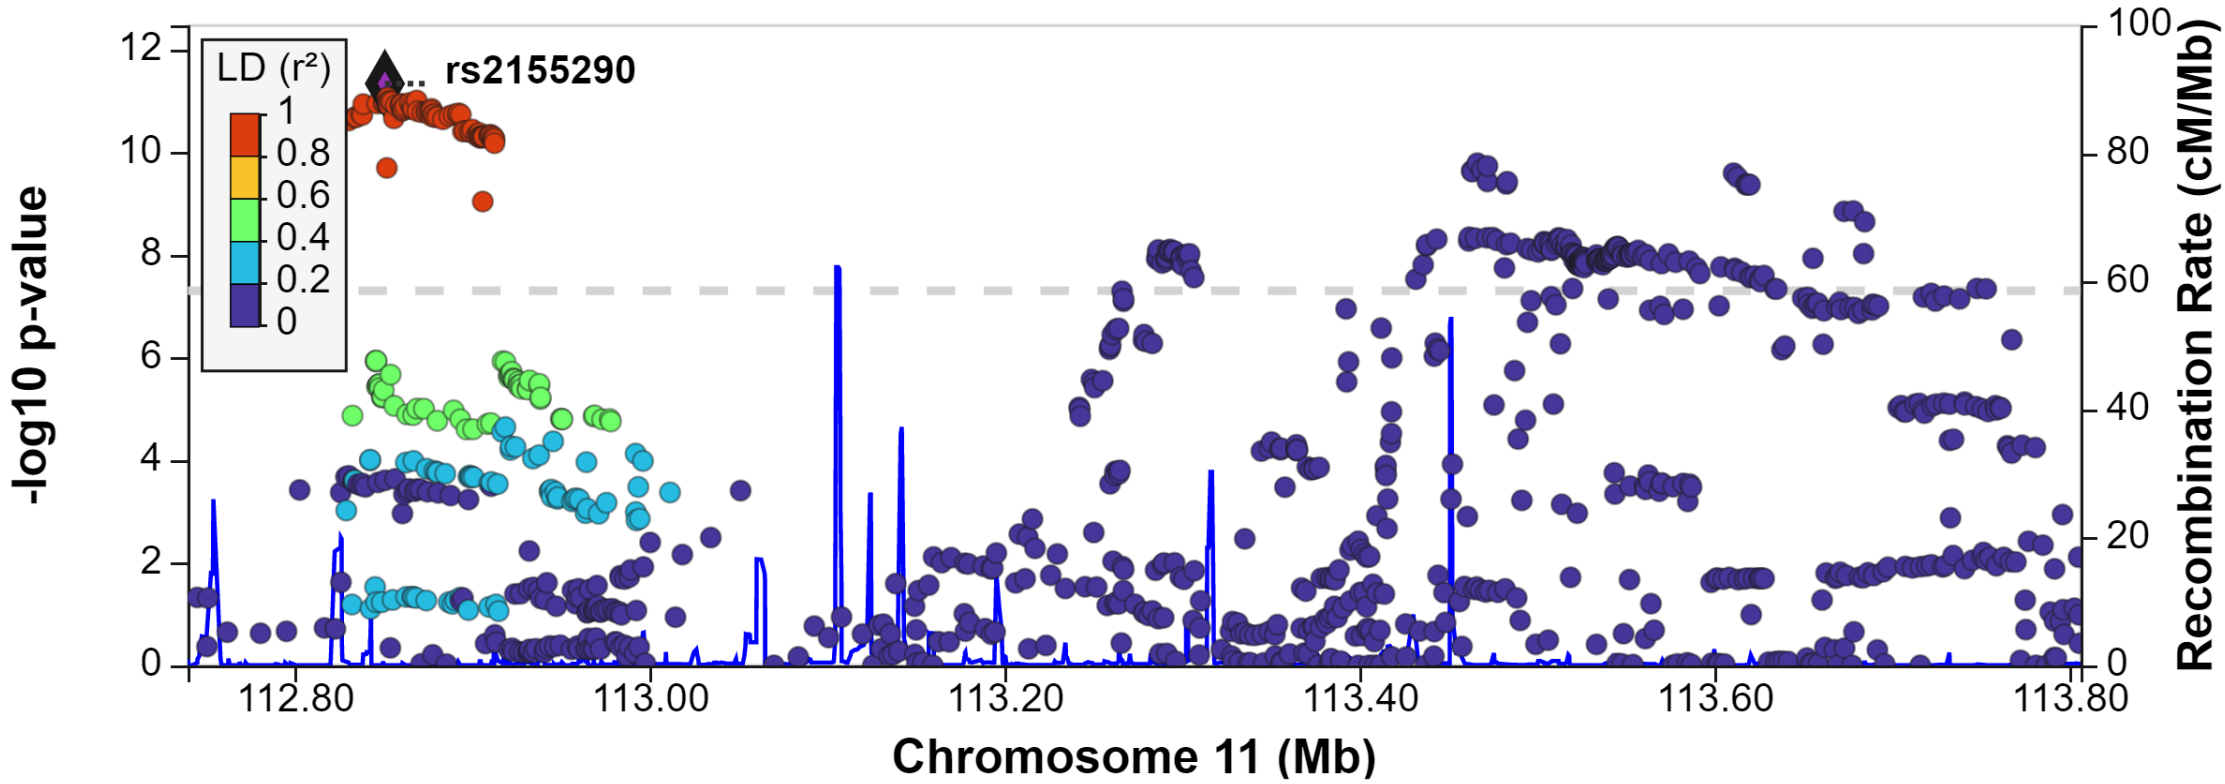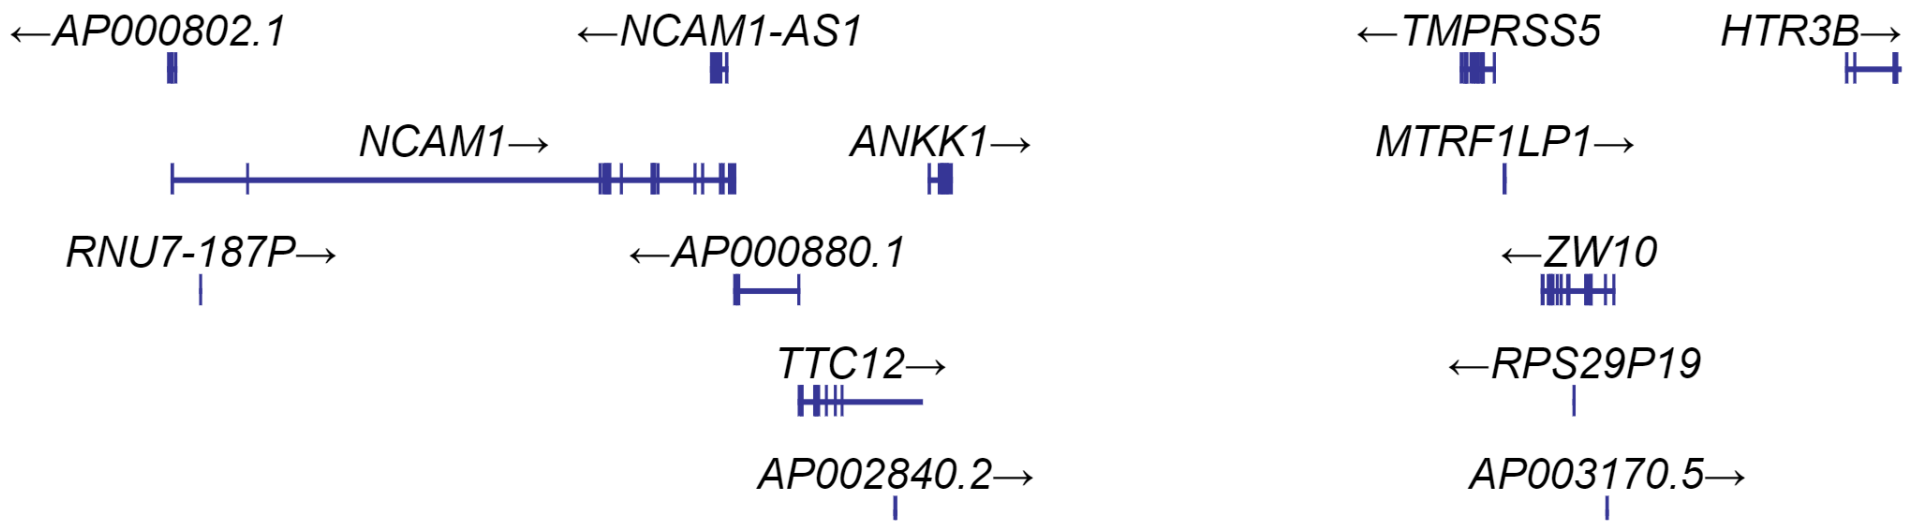

# ADHDxCUD GWAS

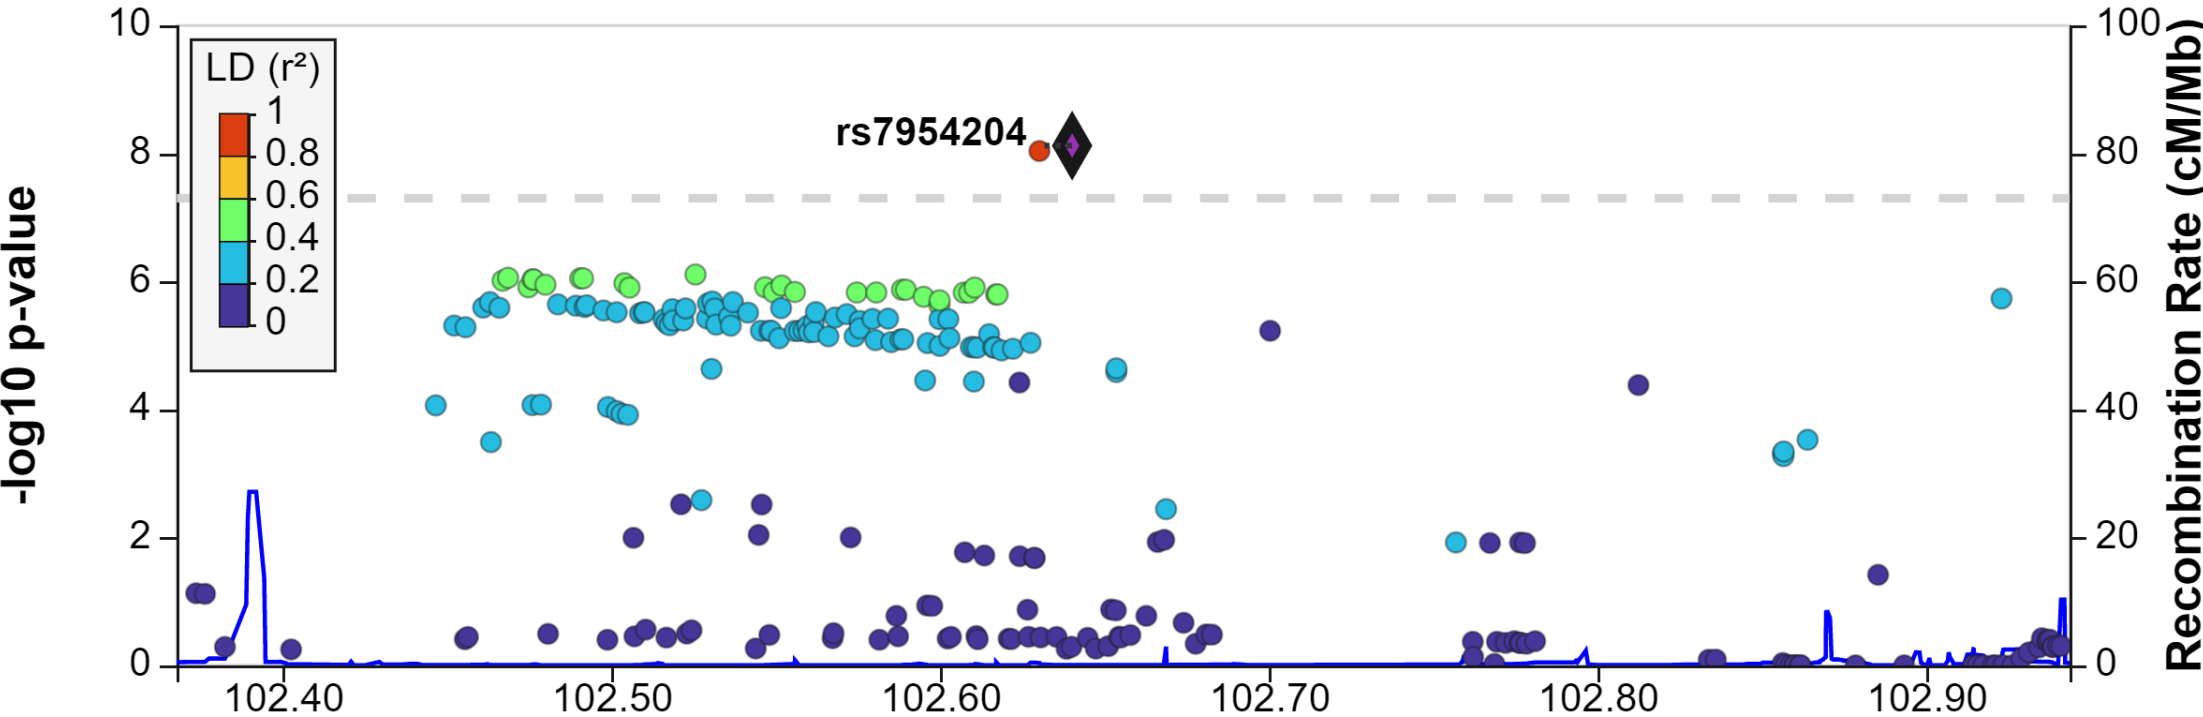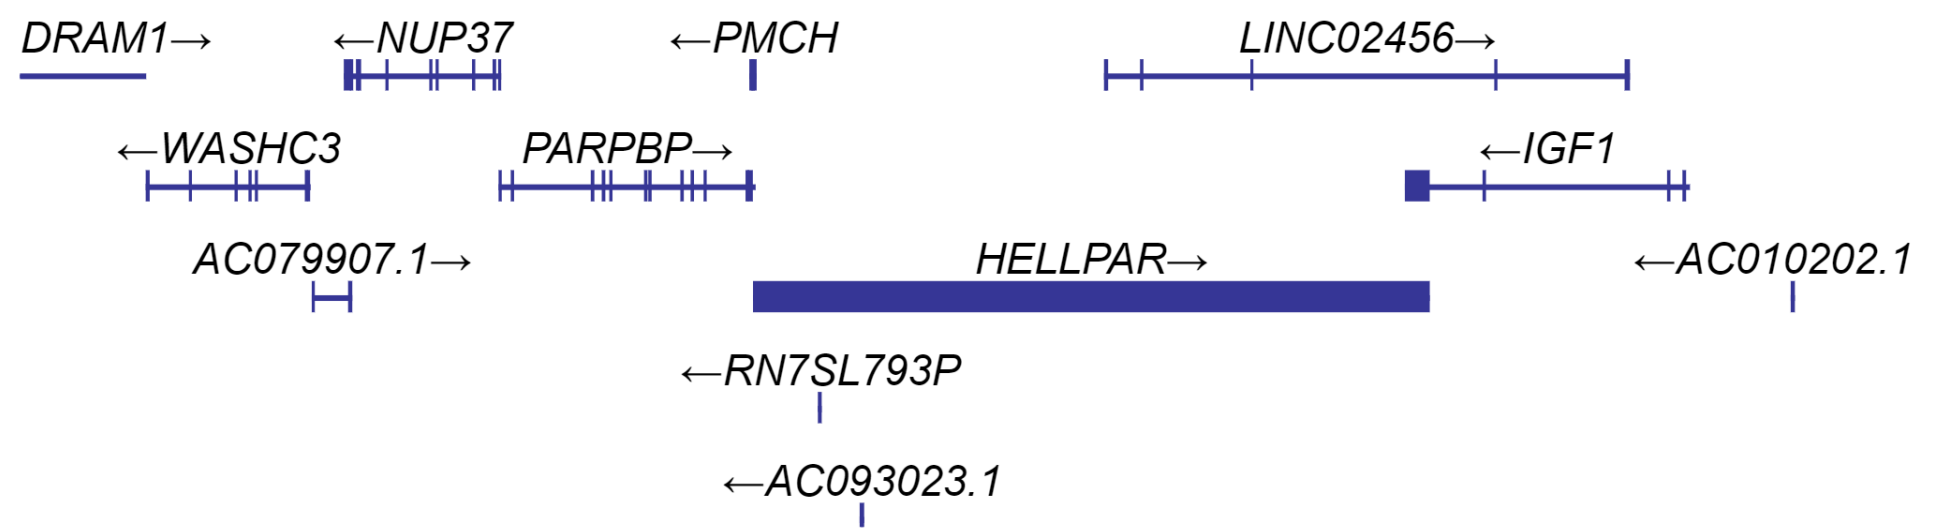

# ADHDxCUD GWAS

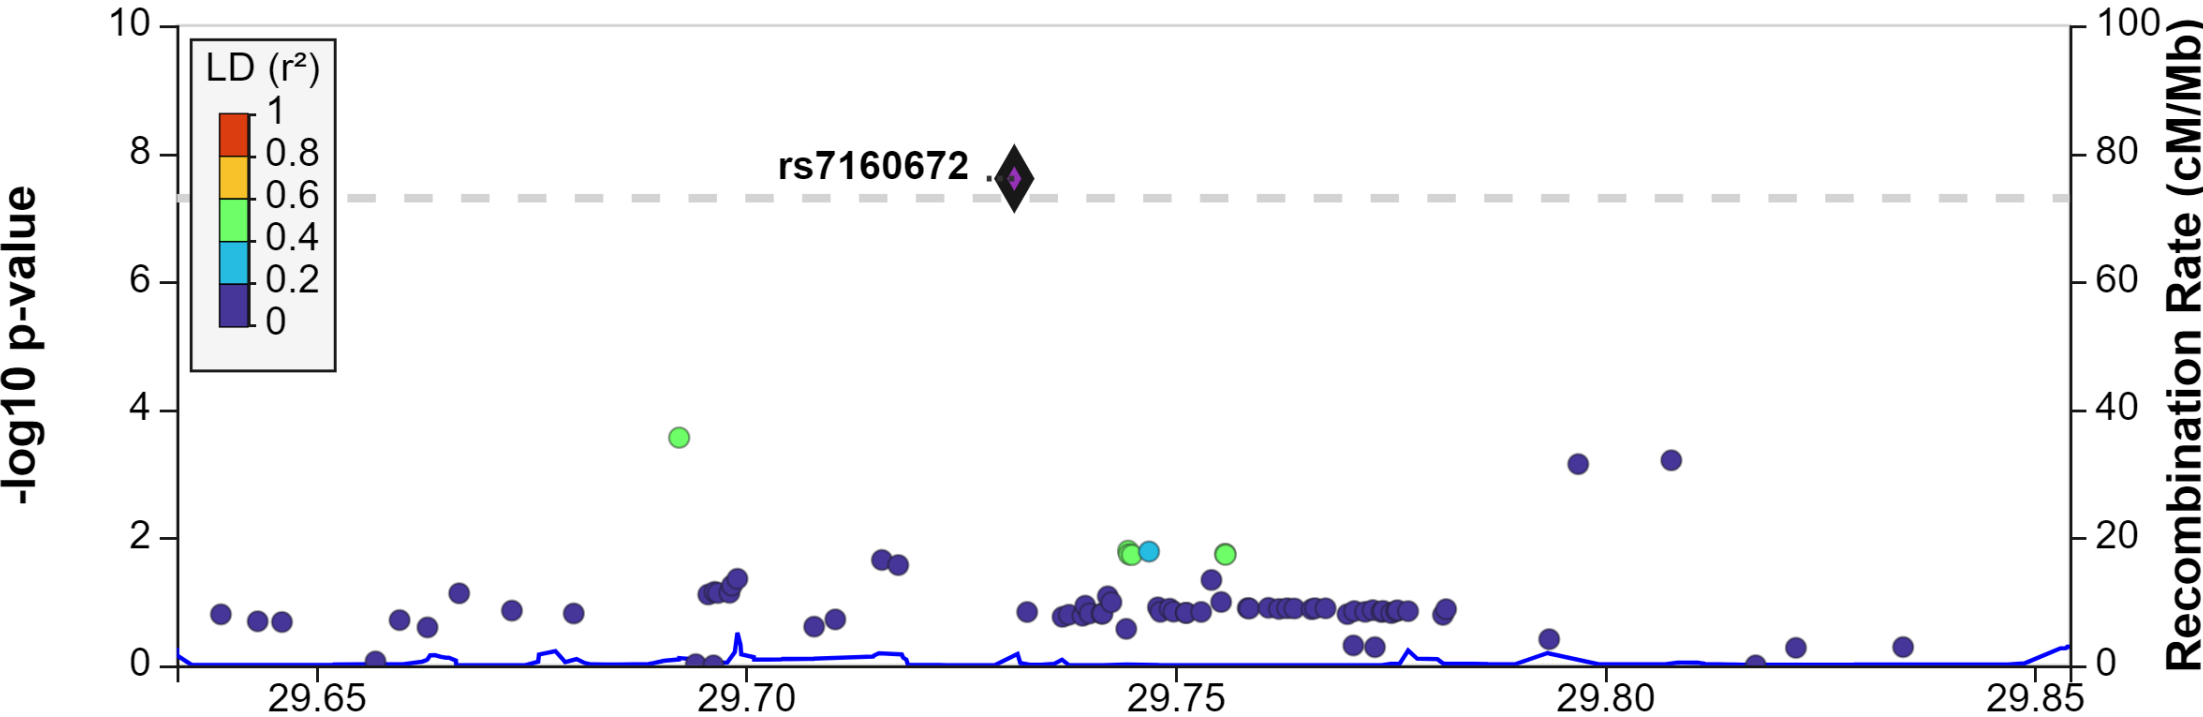

*AL135878.1* →

← *AL133166.1*

# ADHDxCUD GWAS

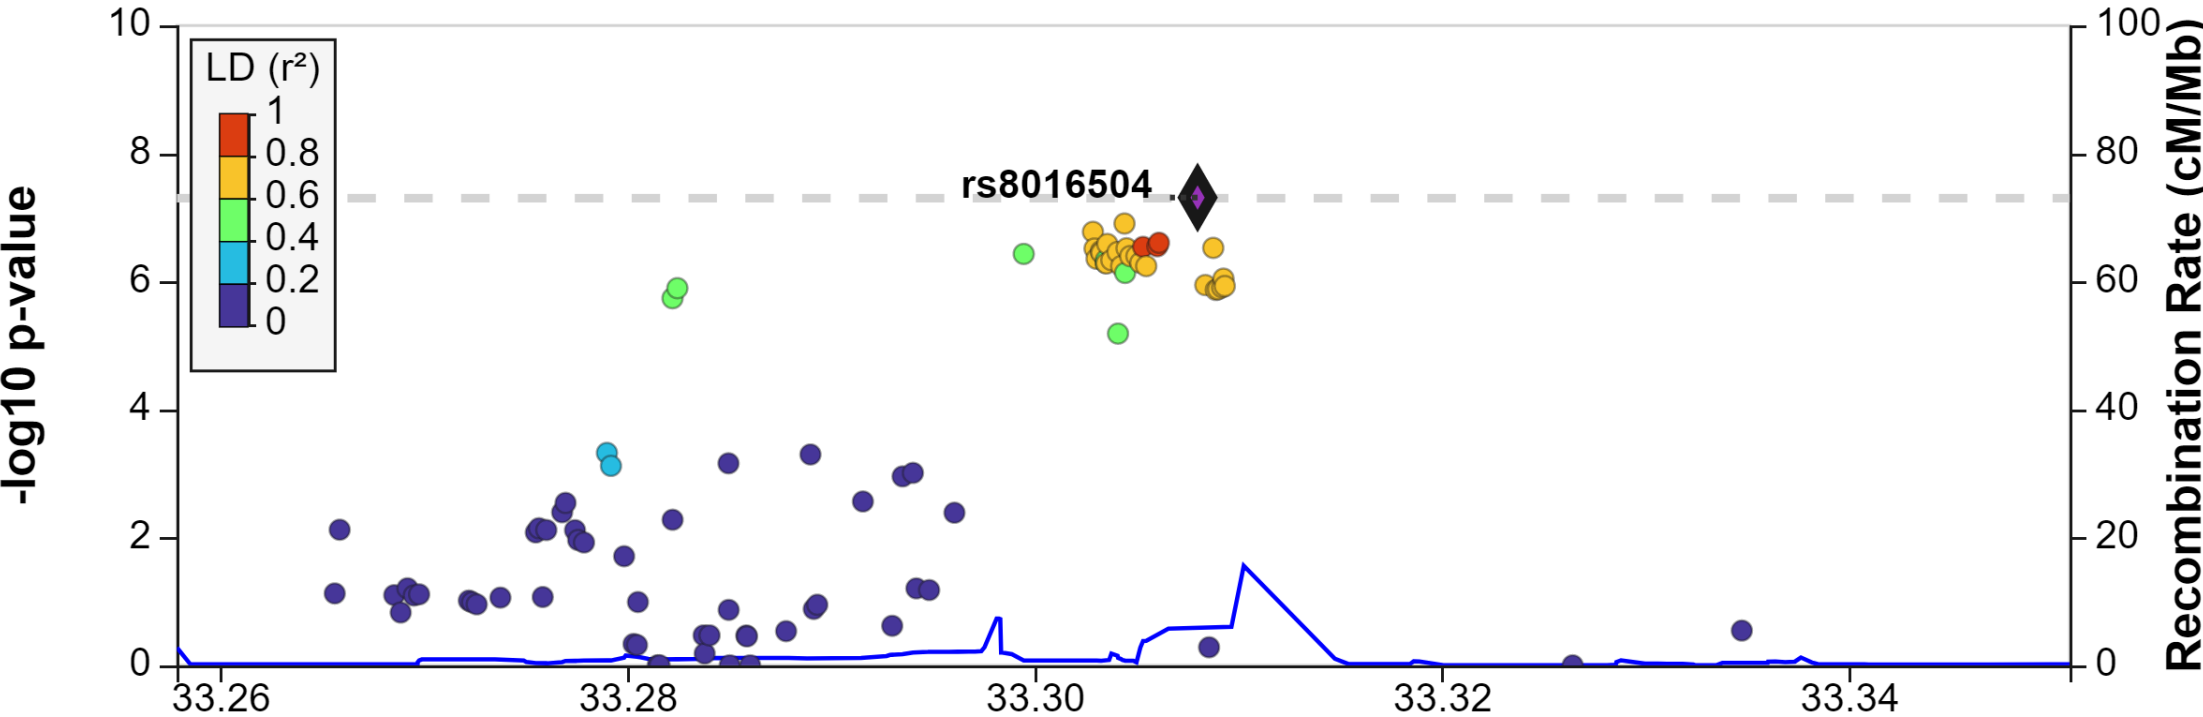

*AKAP6*→

*AL049781.1*→

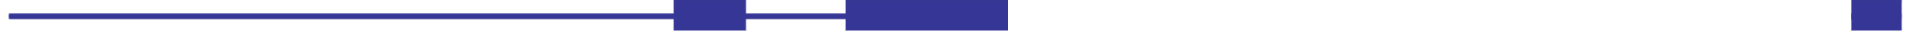

# ADHDxCUD GWAS

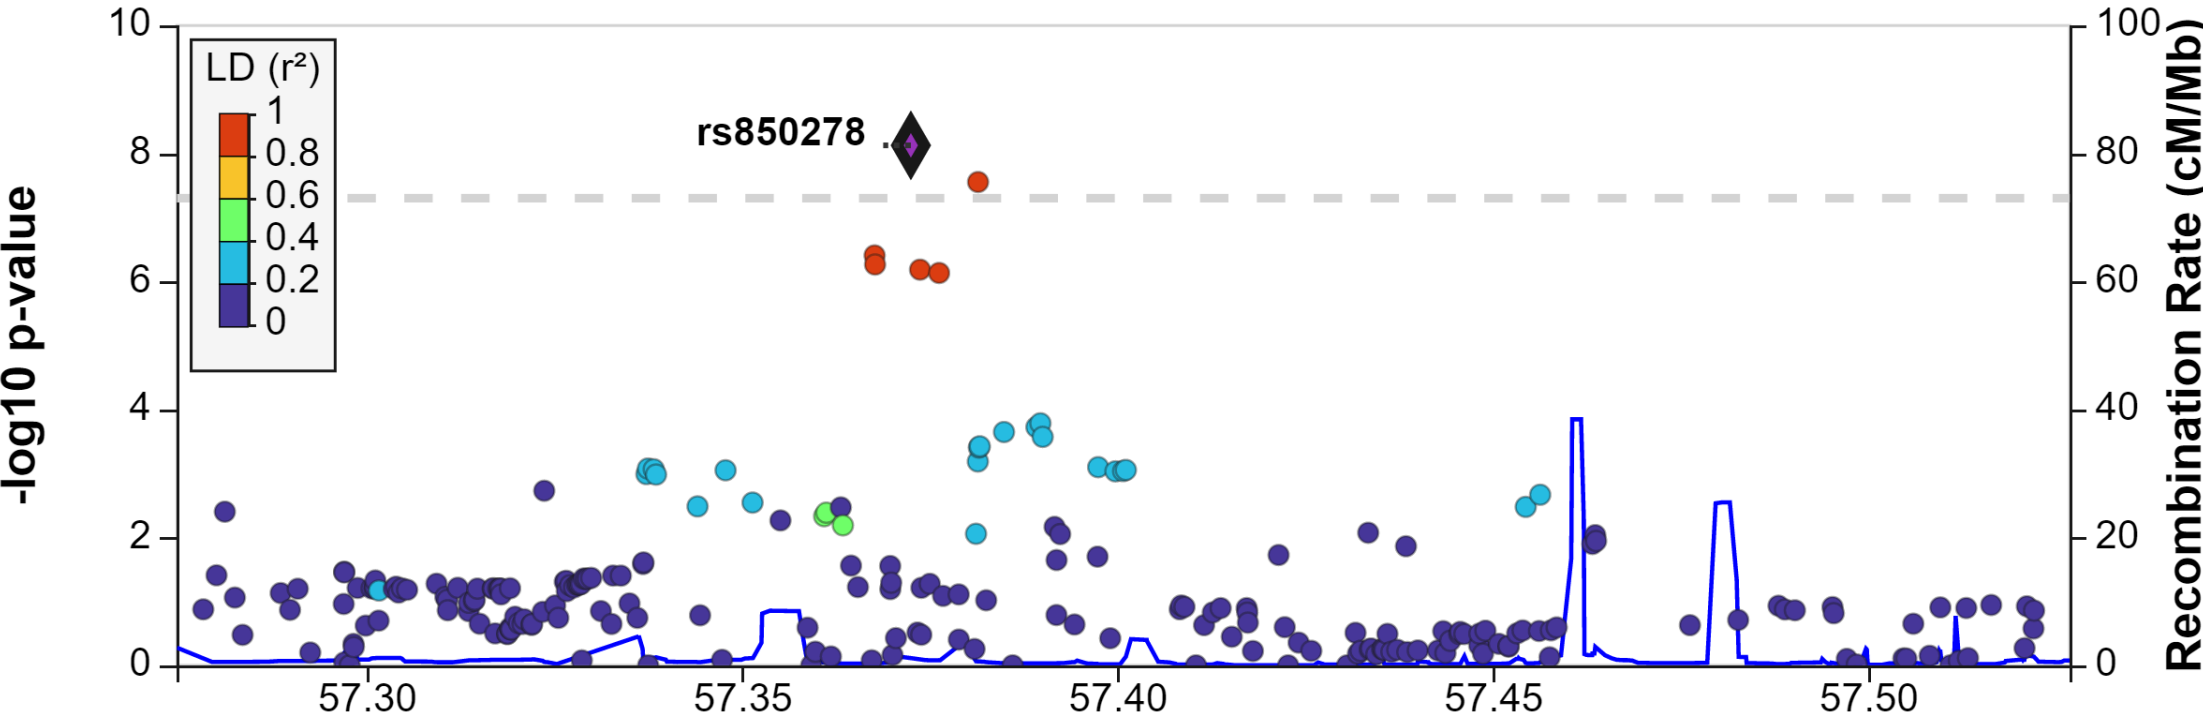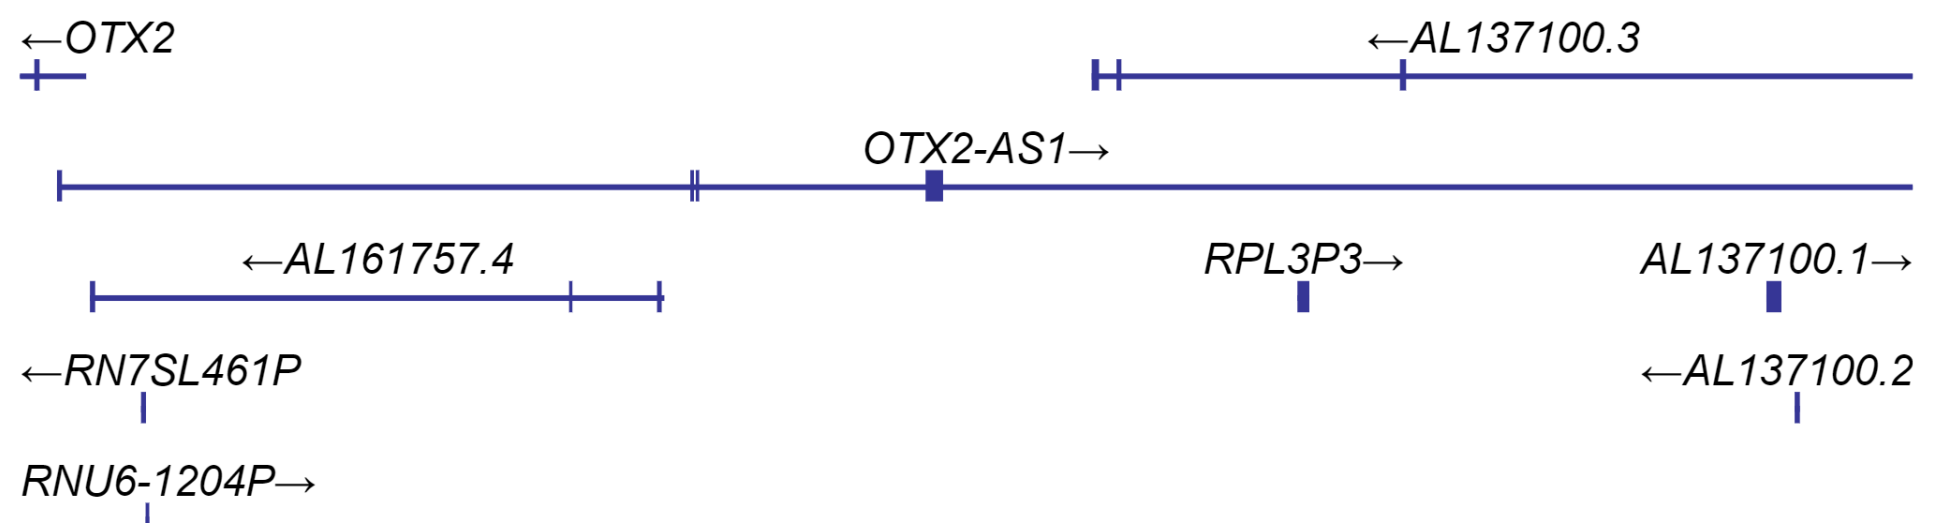

# ADHDxCUD GWAS

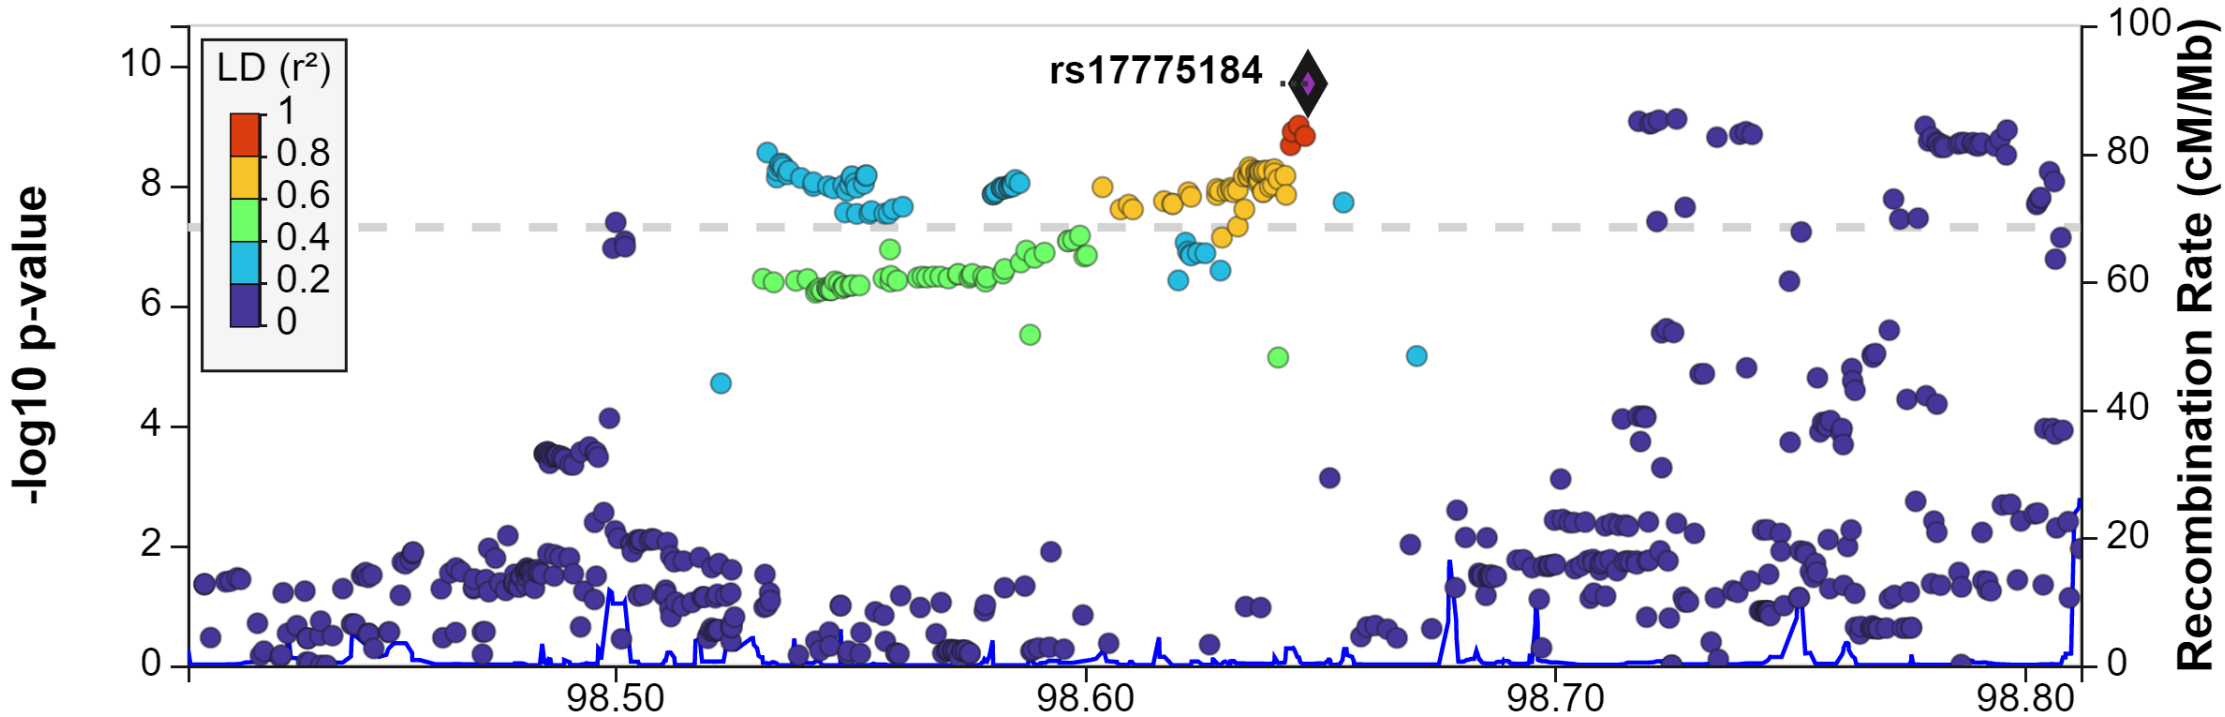

← *LINC01550*

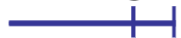

← *AL163932.1*

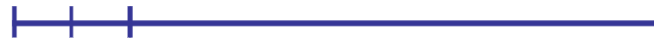

*LINC02295* →

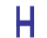

← *AL163760.1*

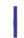

# ADHDxCUD GWAS

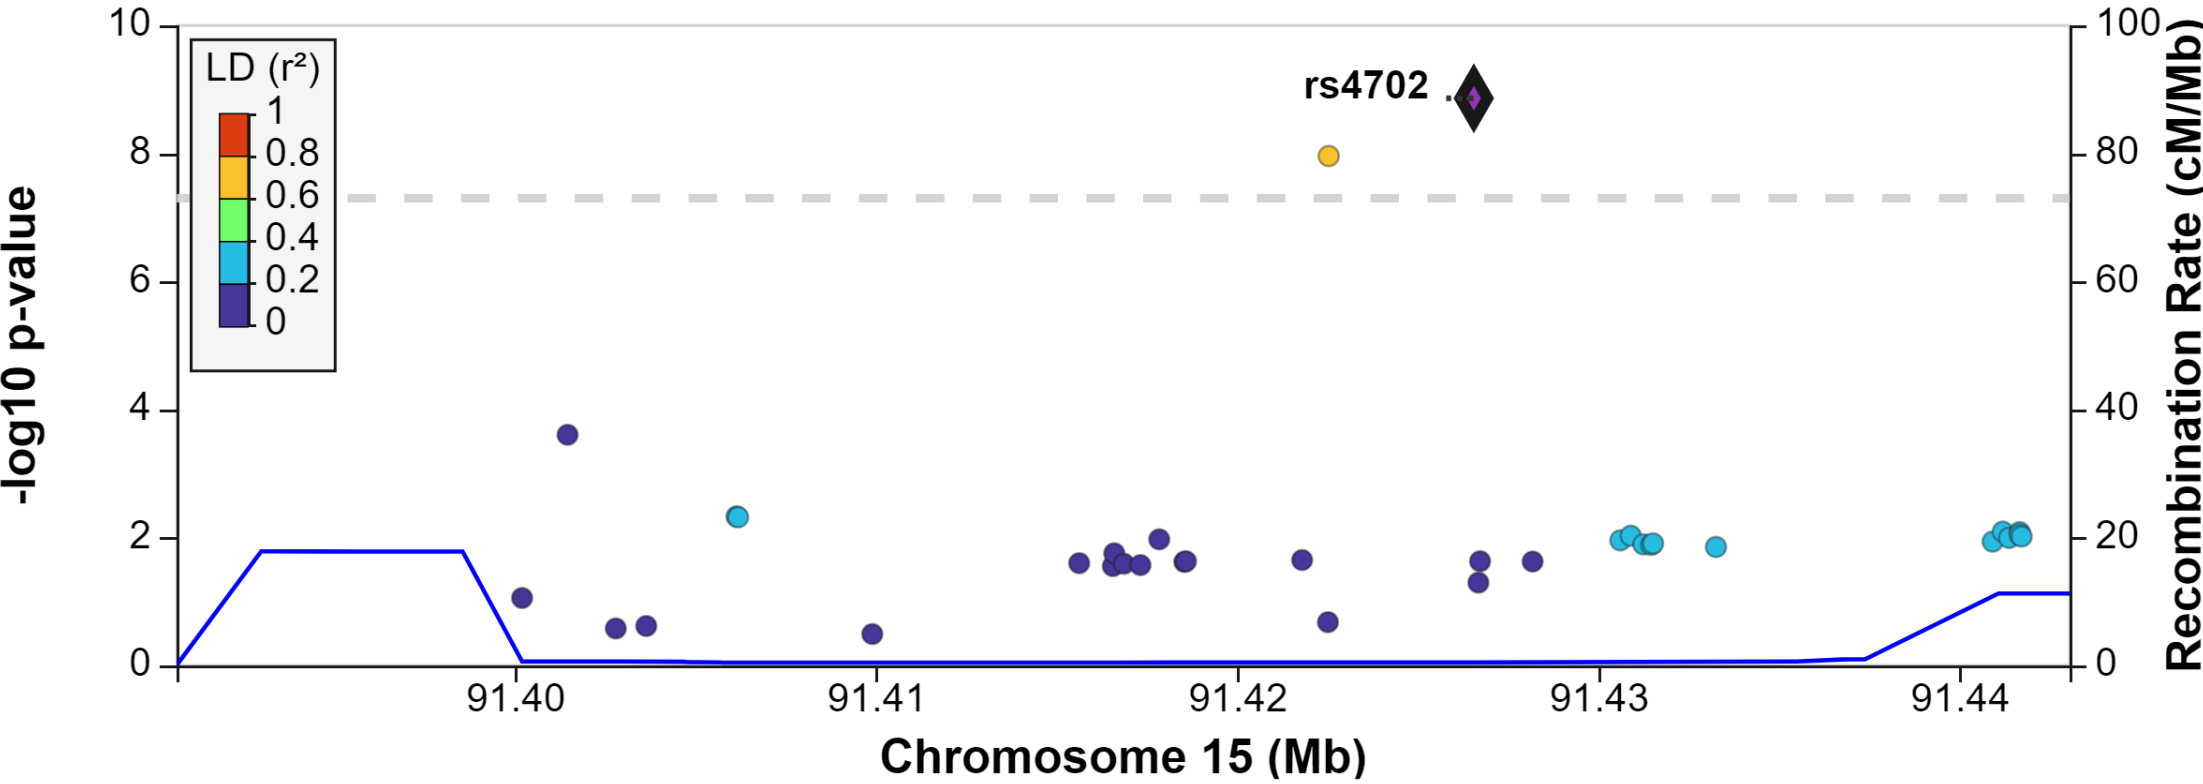

*AC124248.1* →

← *RN7SL363P*

*FURIN* →

*FES* →



# ADHDxCUD GWAS

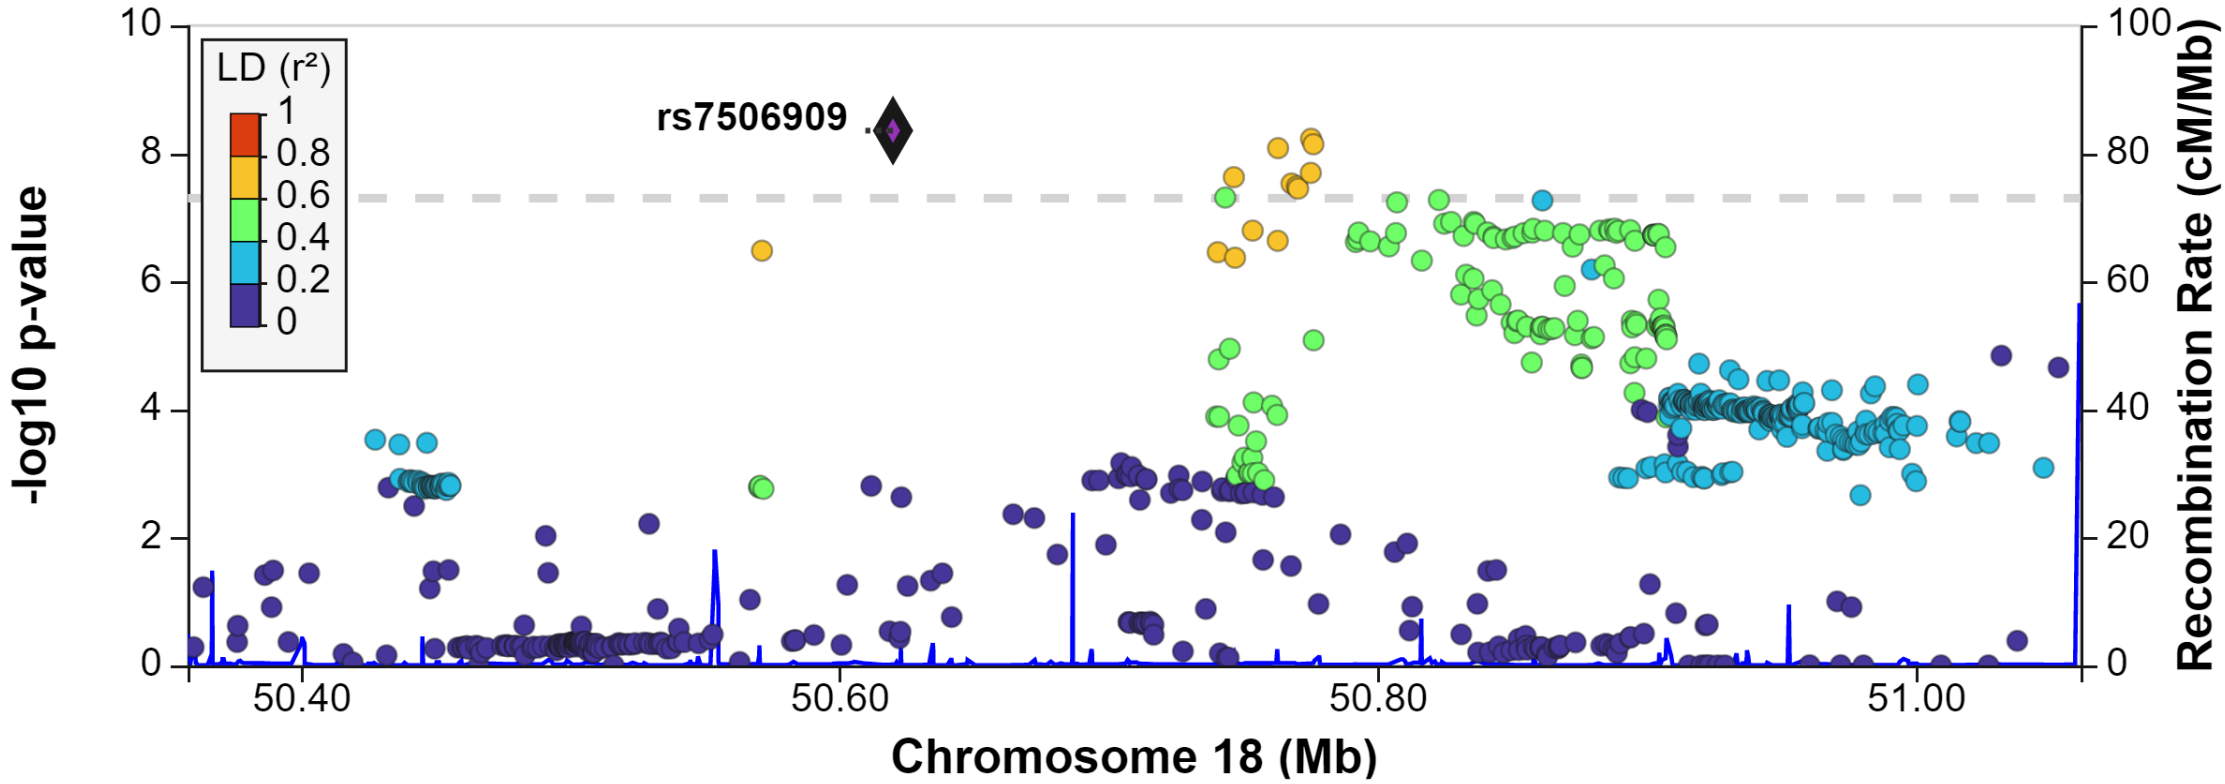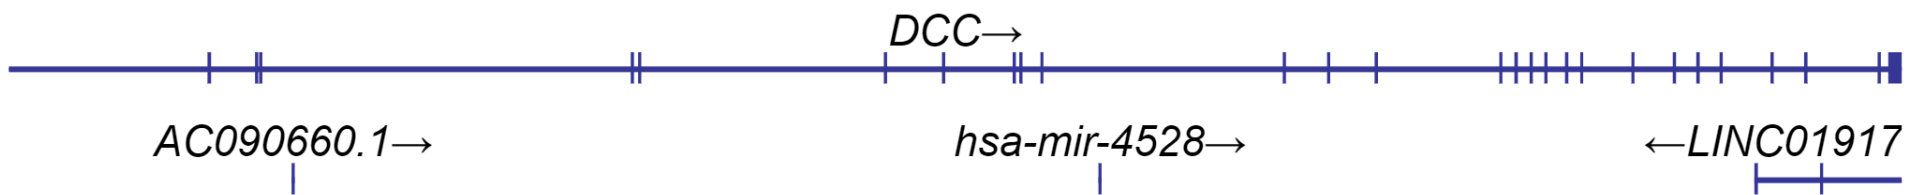

Supplement: Supplementary file [file media-1.pdf]
