# Supplementary material for: Disentangling the shared genetics of ADHD, cannabis use disorder and cannabis use and prediction of cannabis use disorder in ADHD
Source: bioRxiv or medRxiv preprint supplement (doi:10.1101/2024.02.22.24303124), 2024-02-24

Lead SNP: rs30266

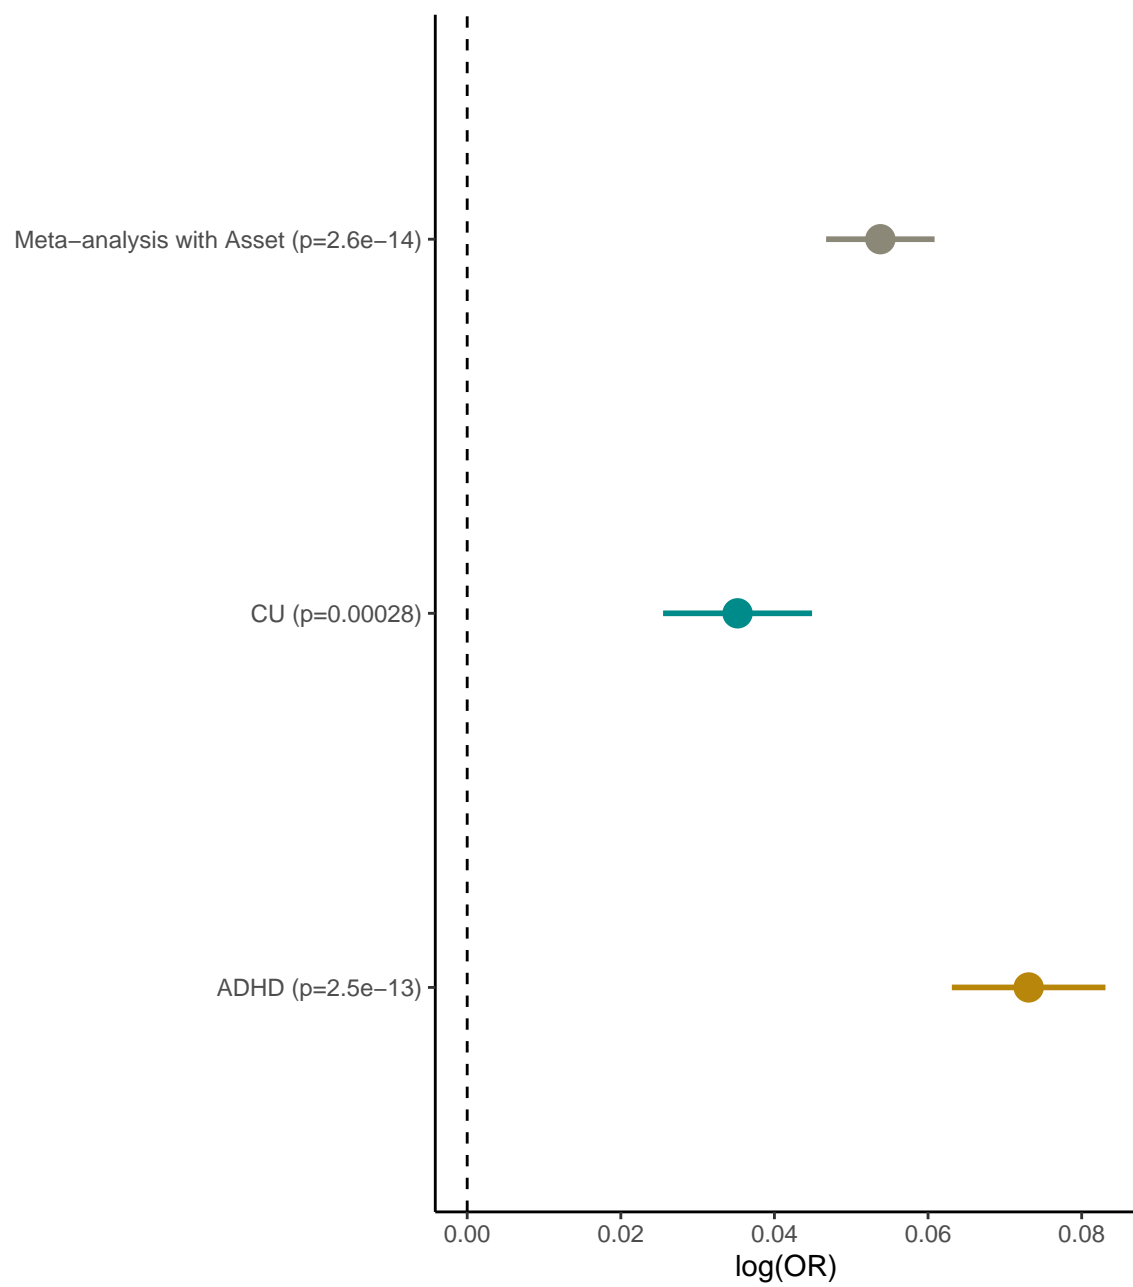

PM-Plot

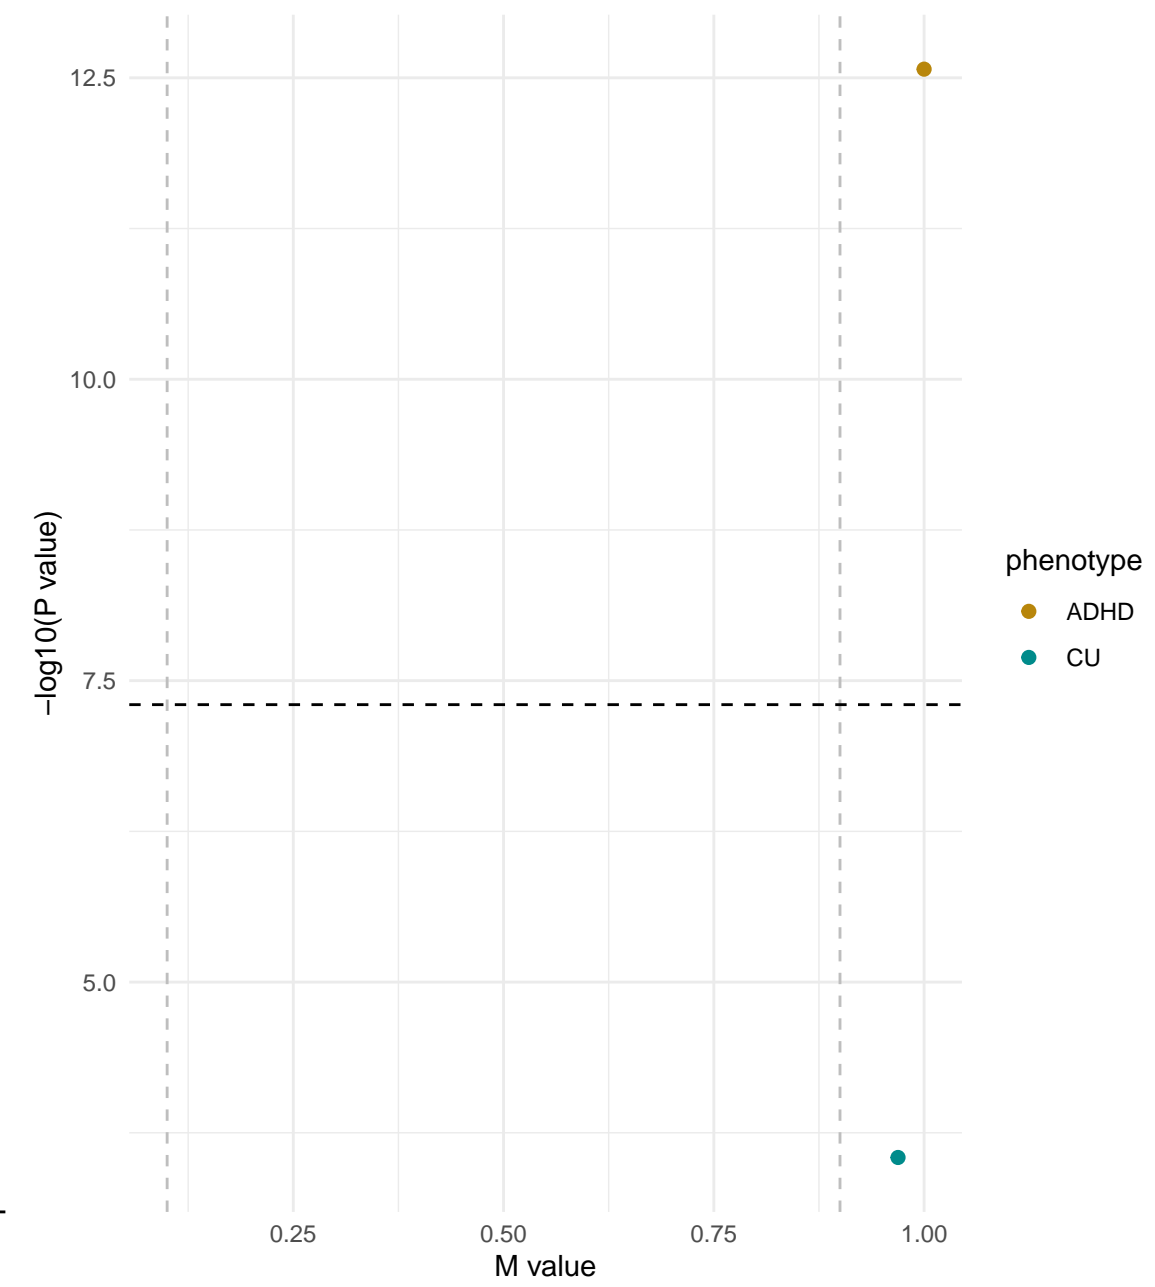

Lead SNP: rs1381274

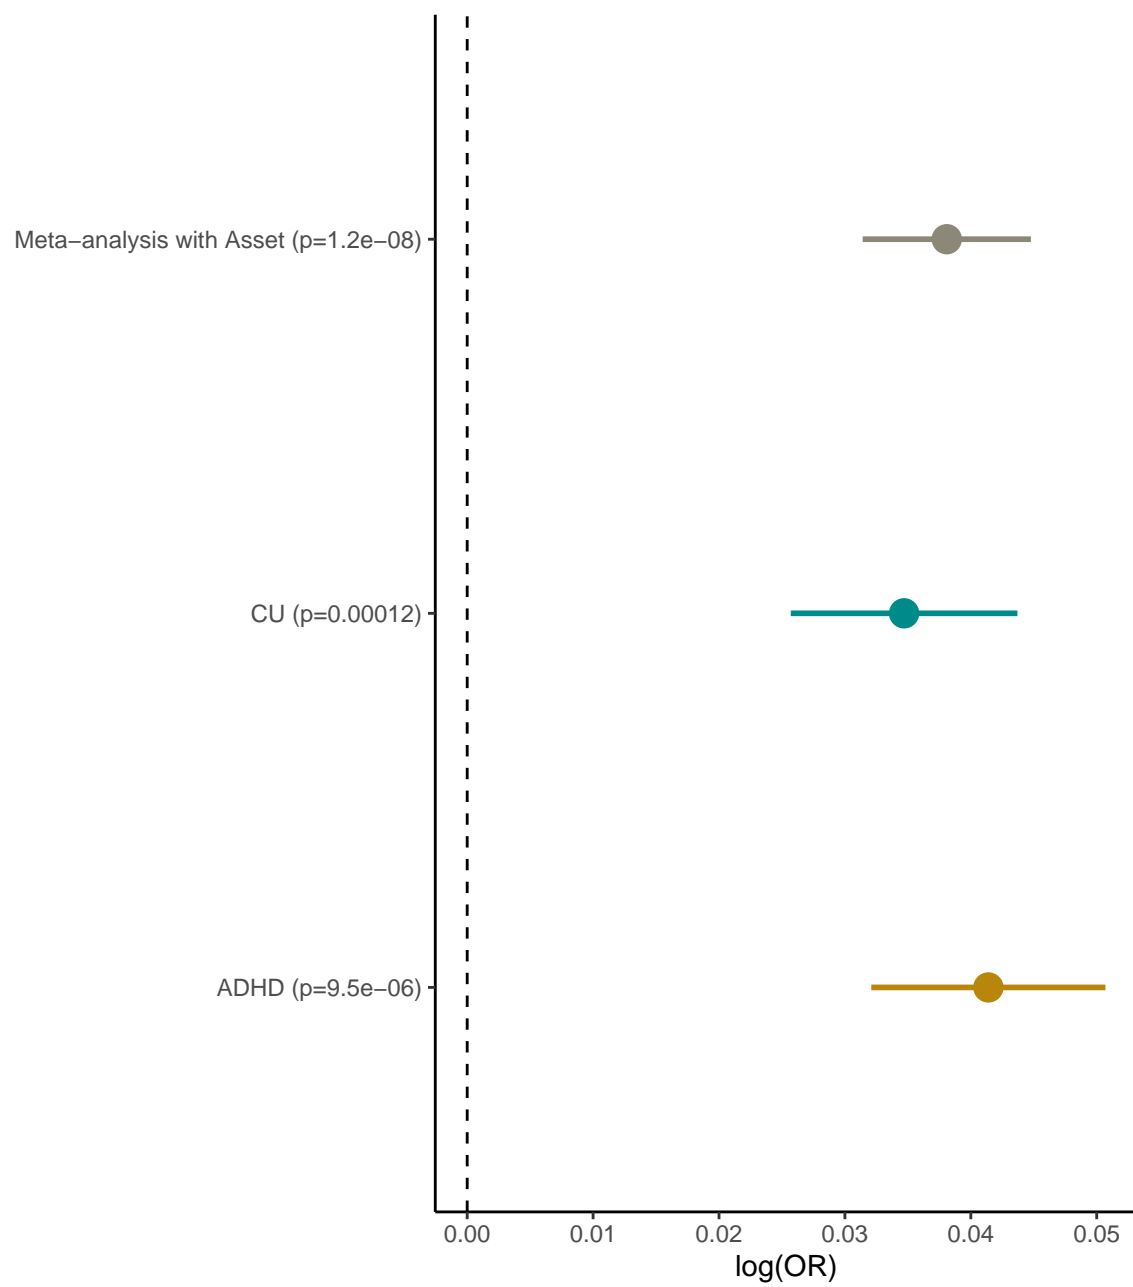

PM-Plot

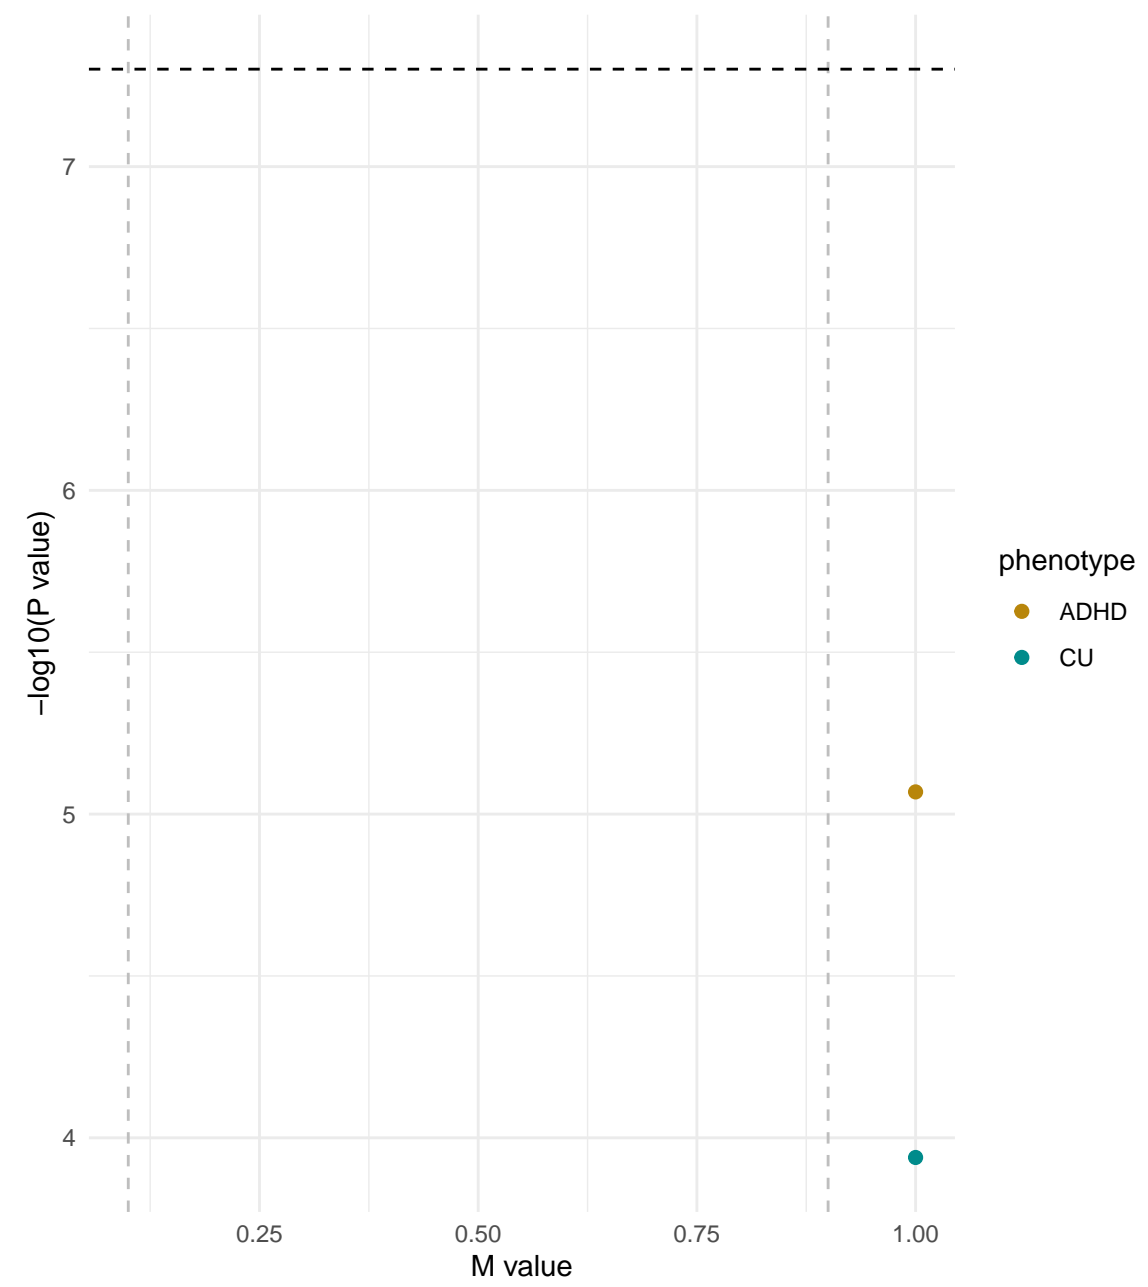

Lead SNP: rs4308708

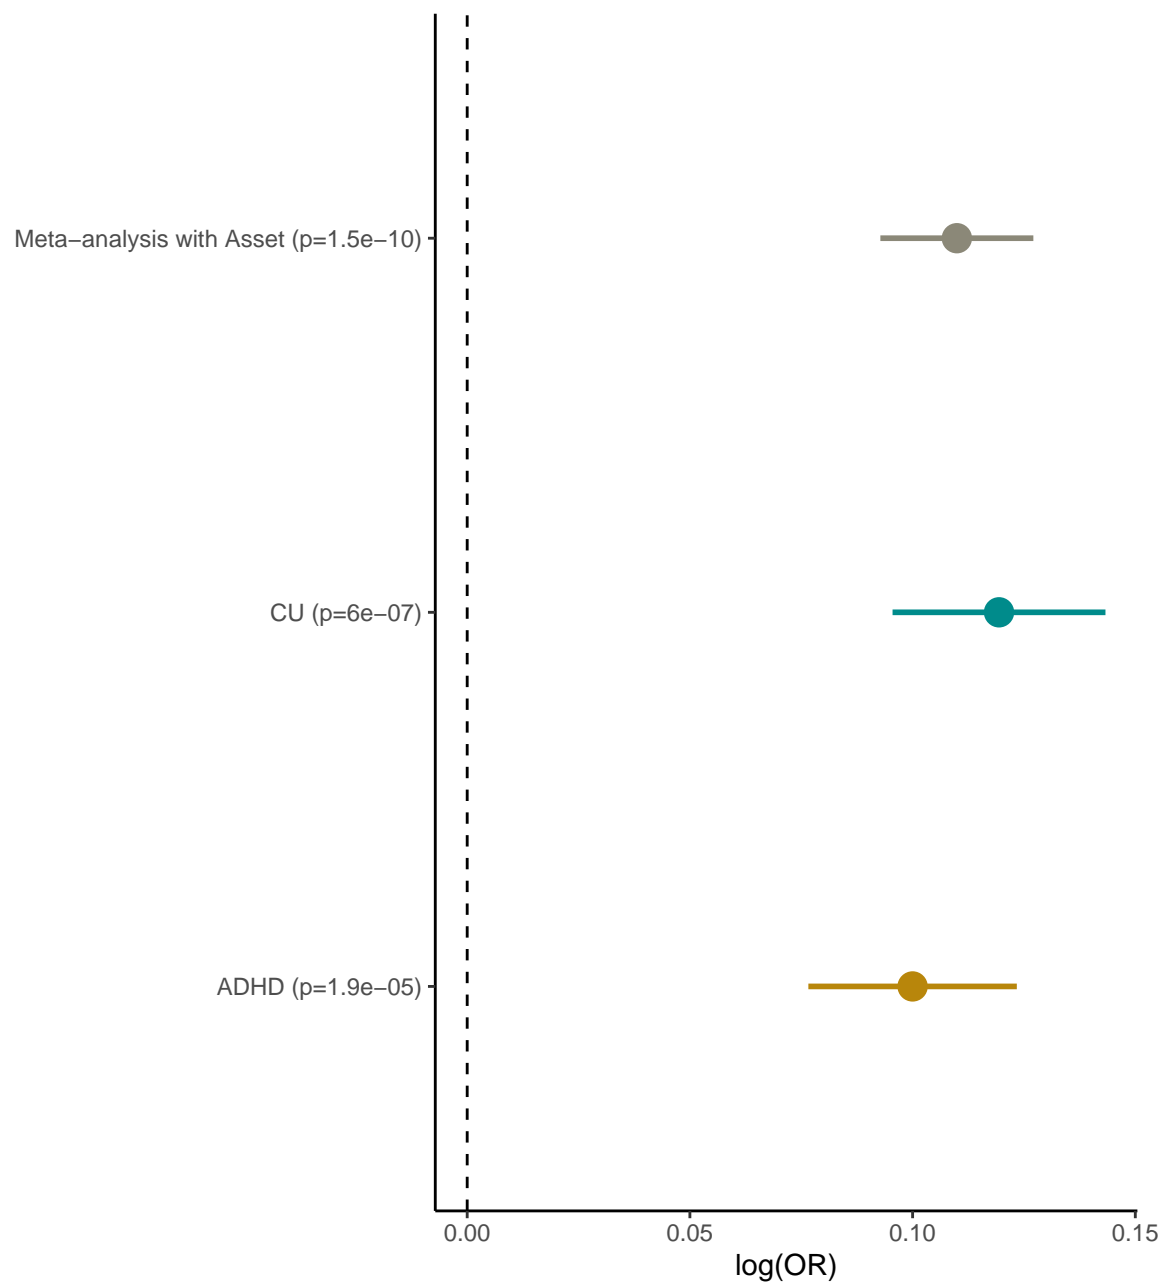

PM-Plot

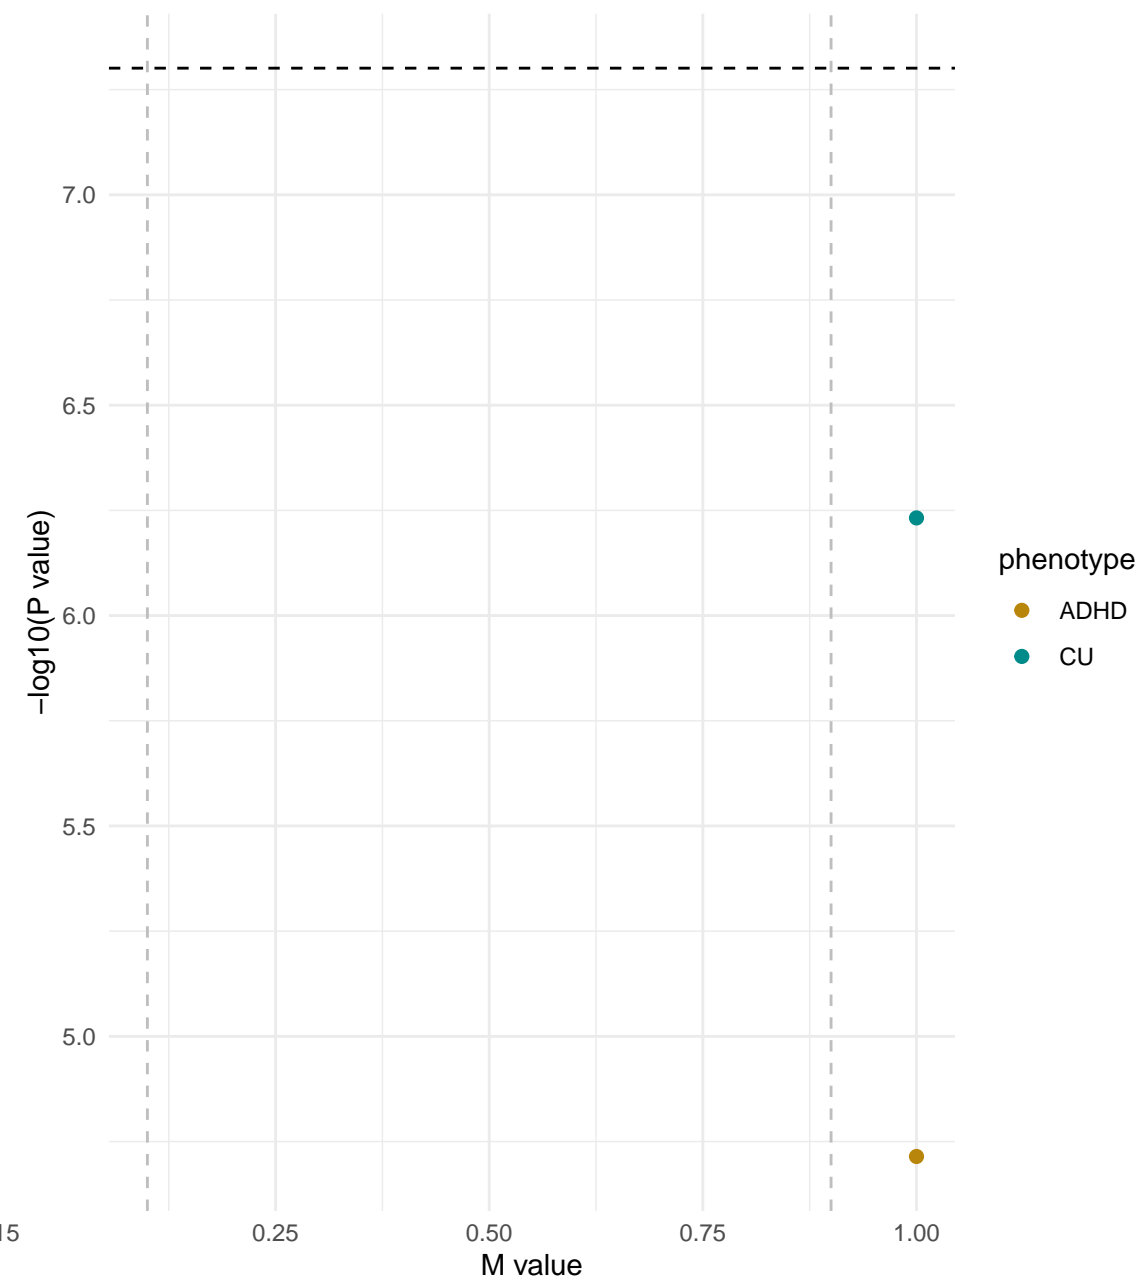

Lead SNP: rs6414946

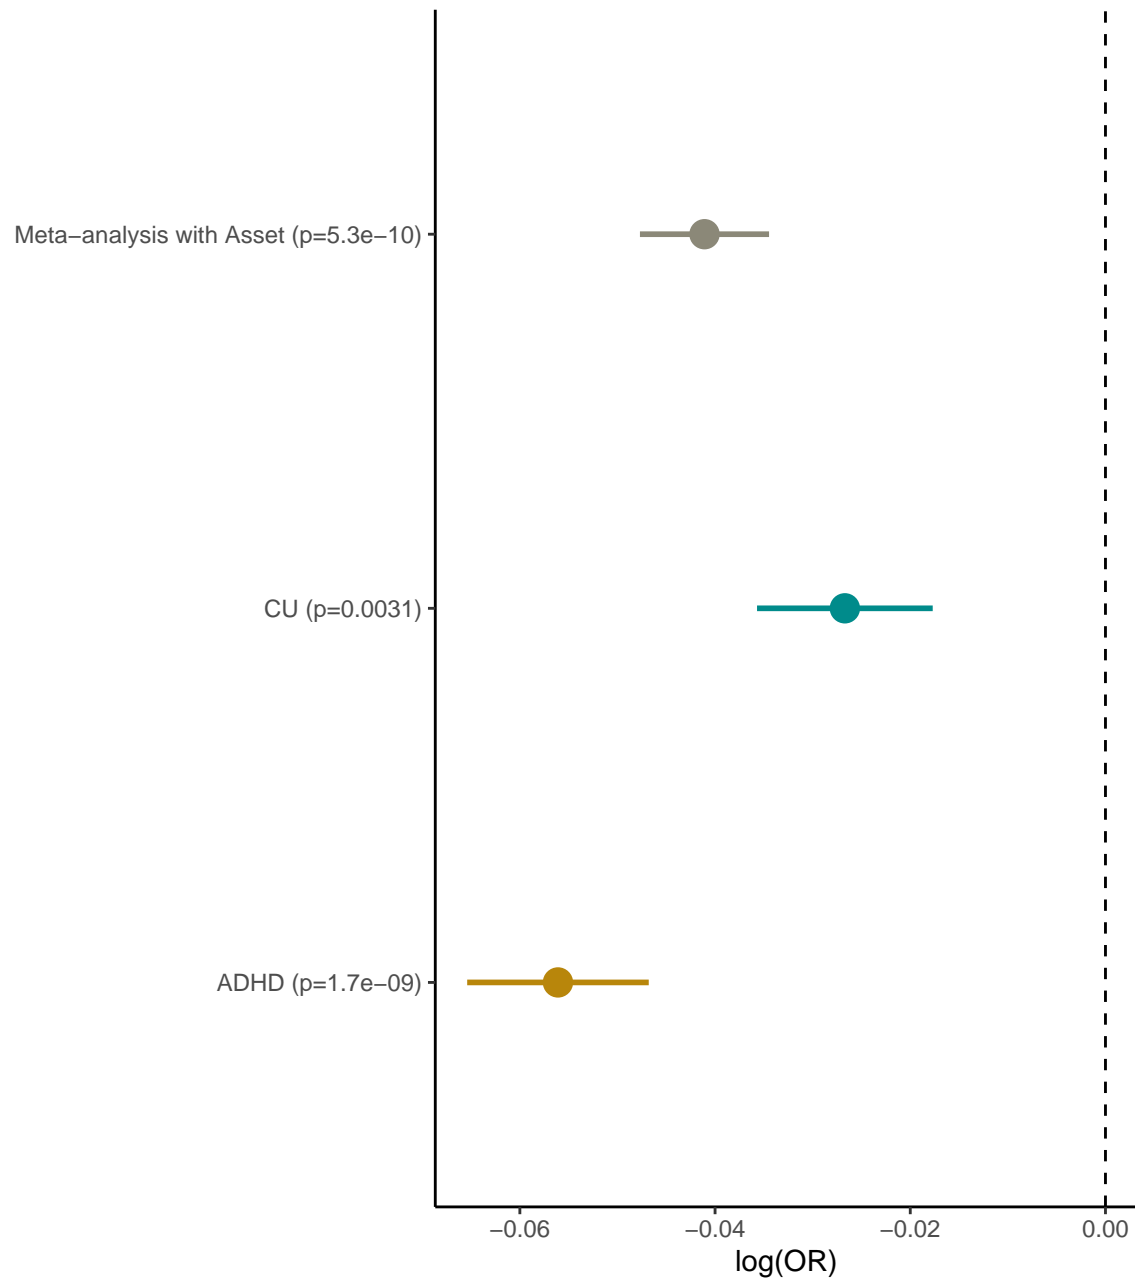

PM-Plot

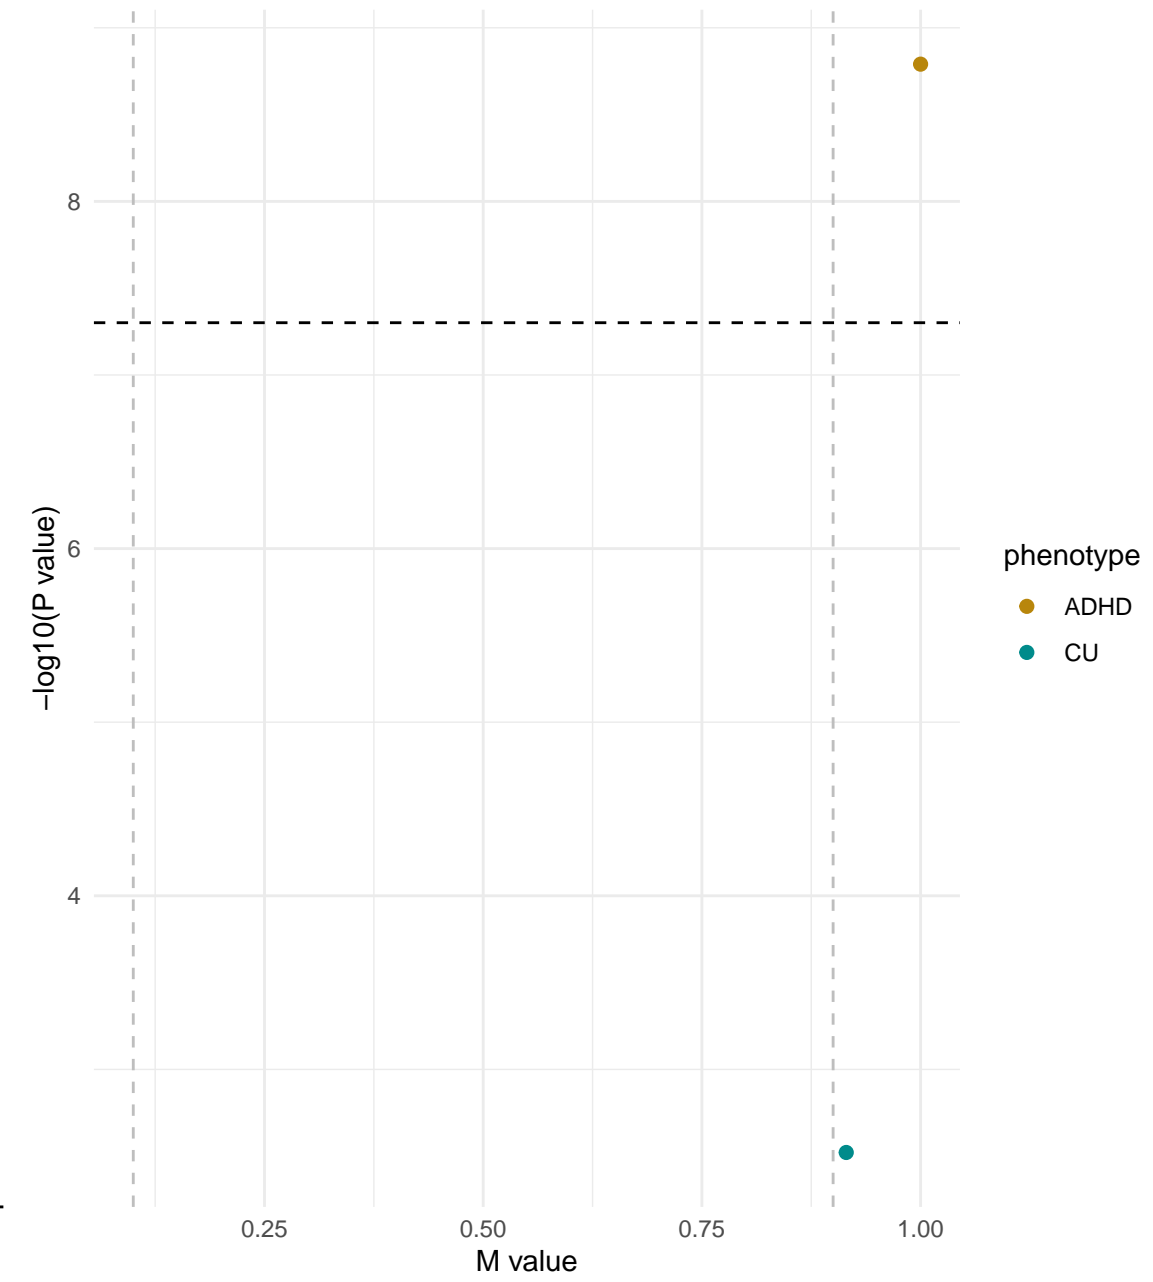

Lead SNP: rs9919557

PM-Plot

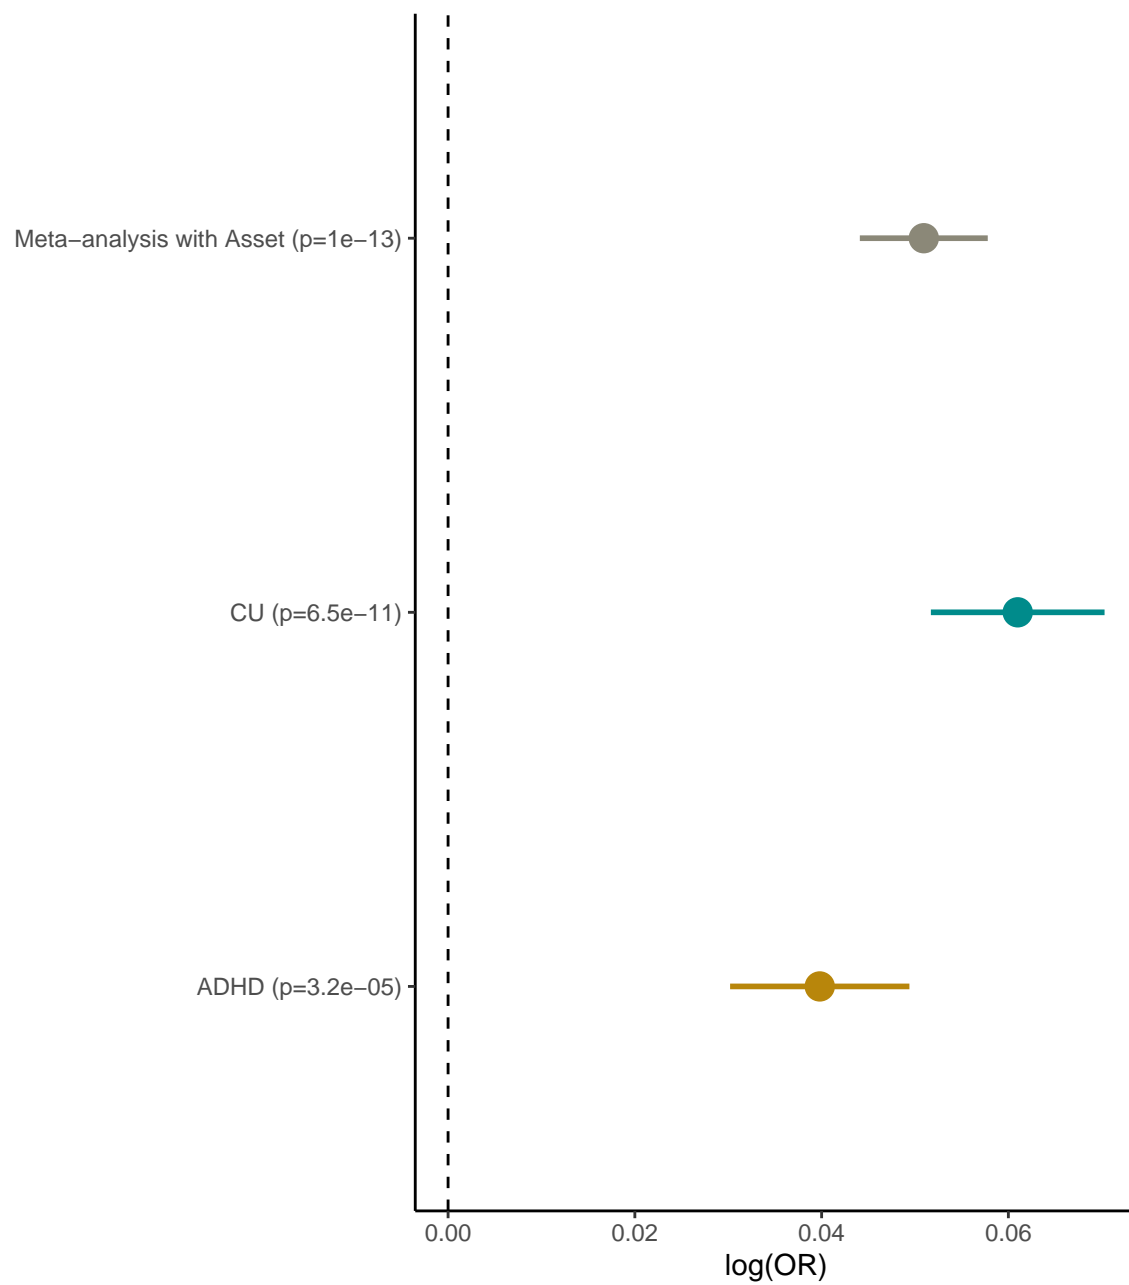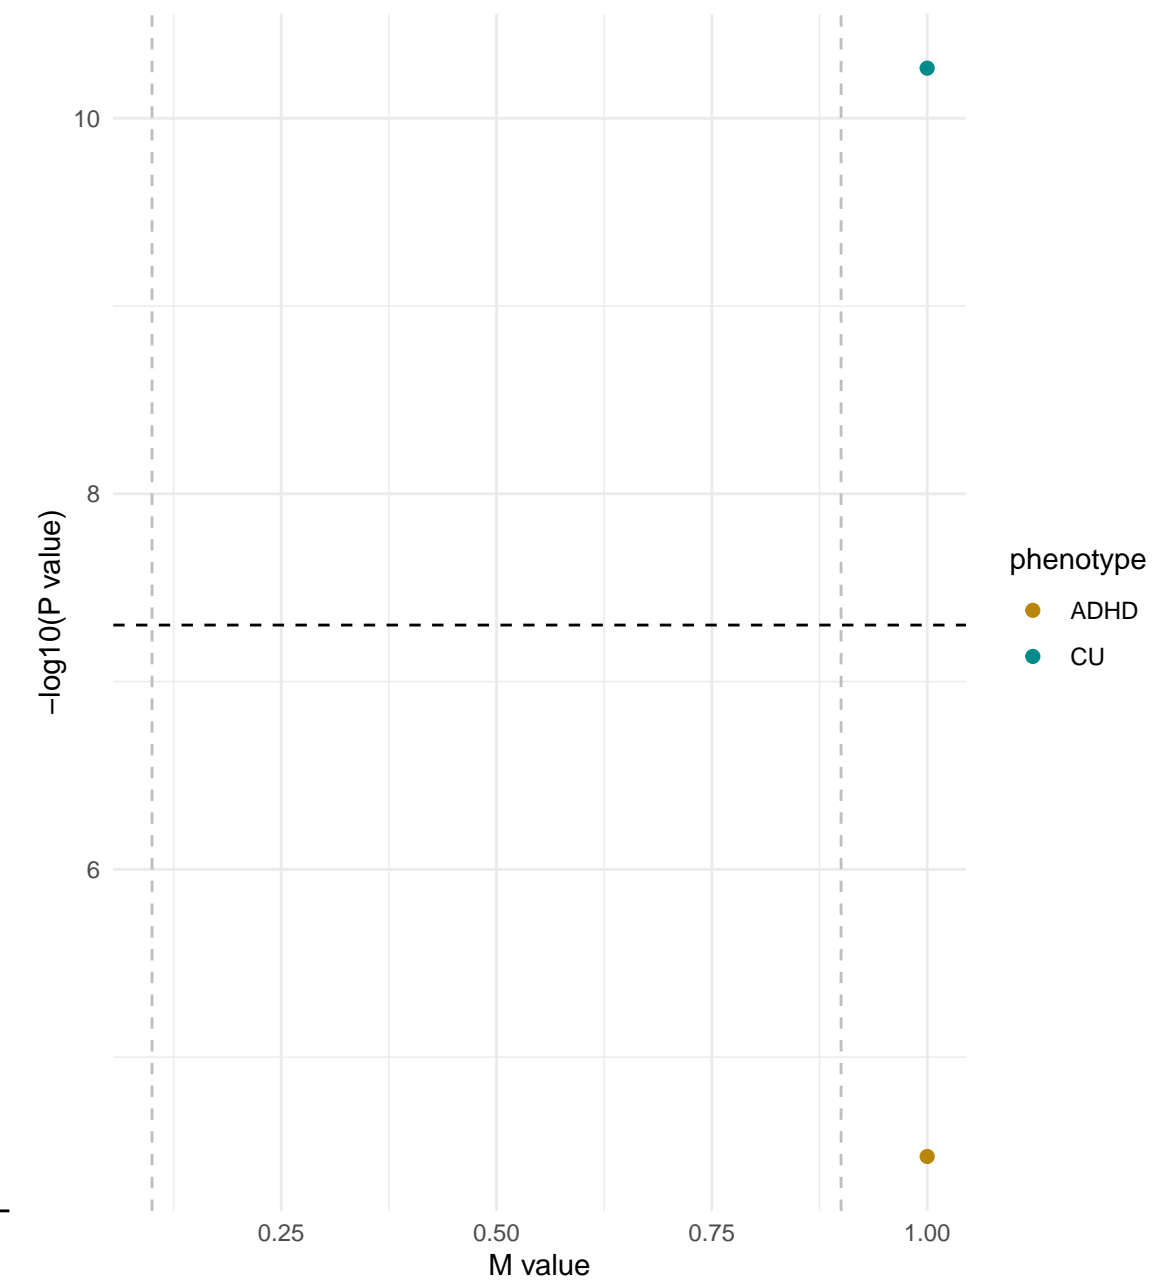

Lead SNP: rs10008926

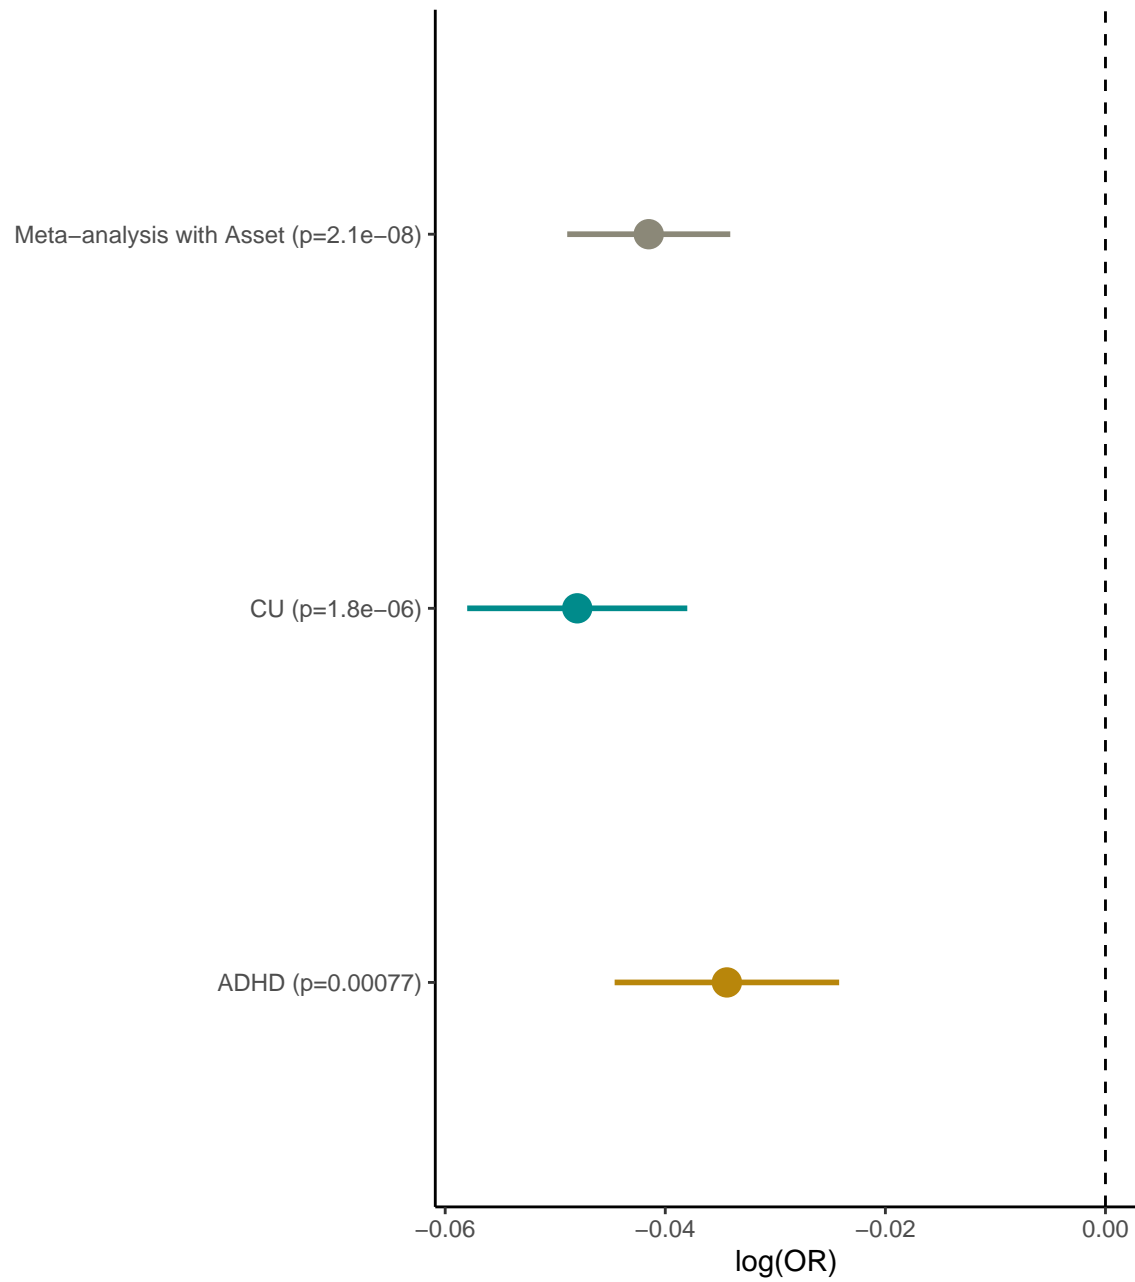

PM-Plot

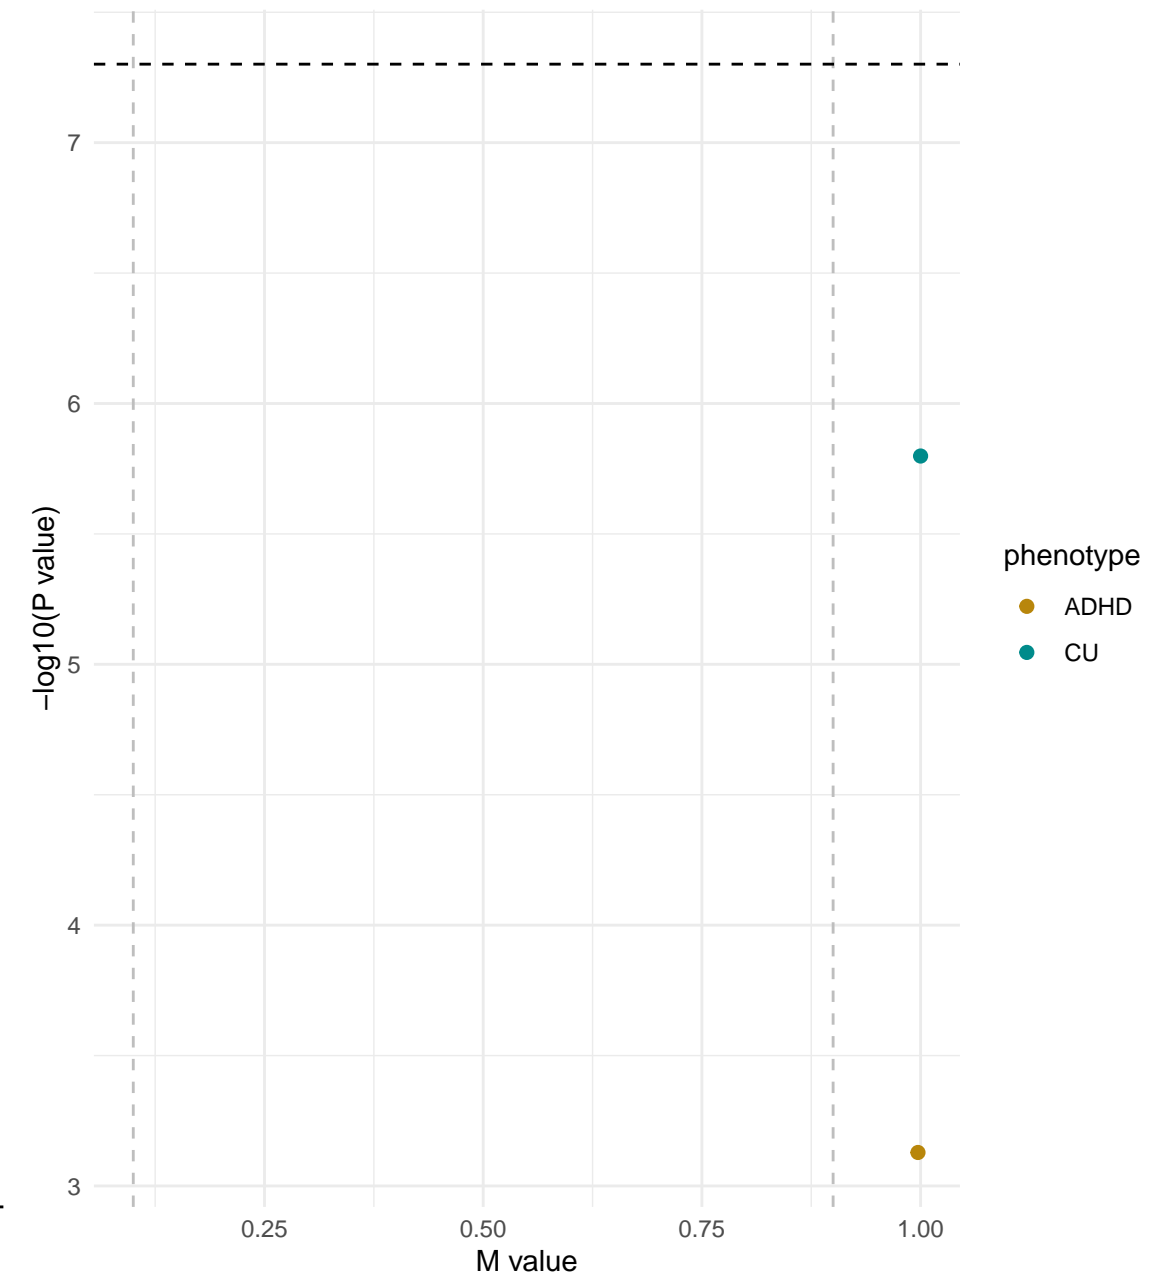

Lead SNP: rs10108814

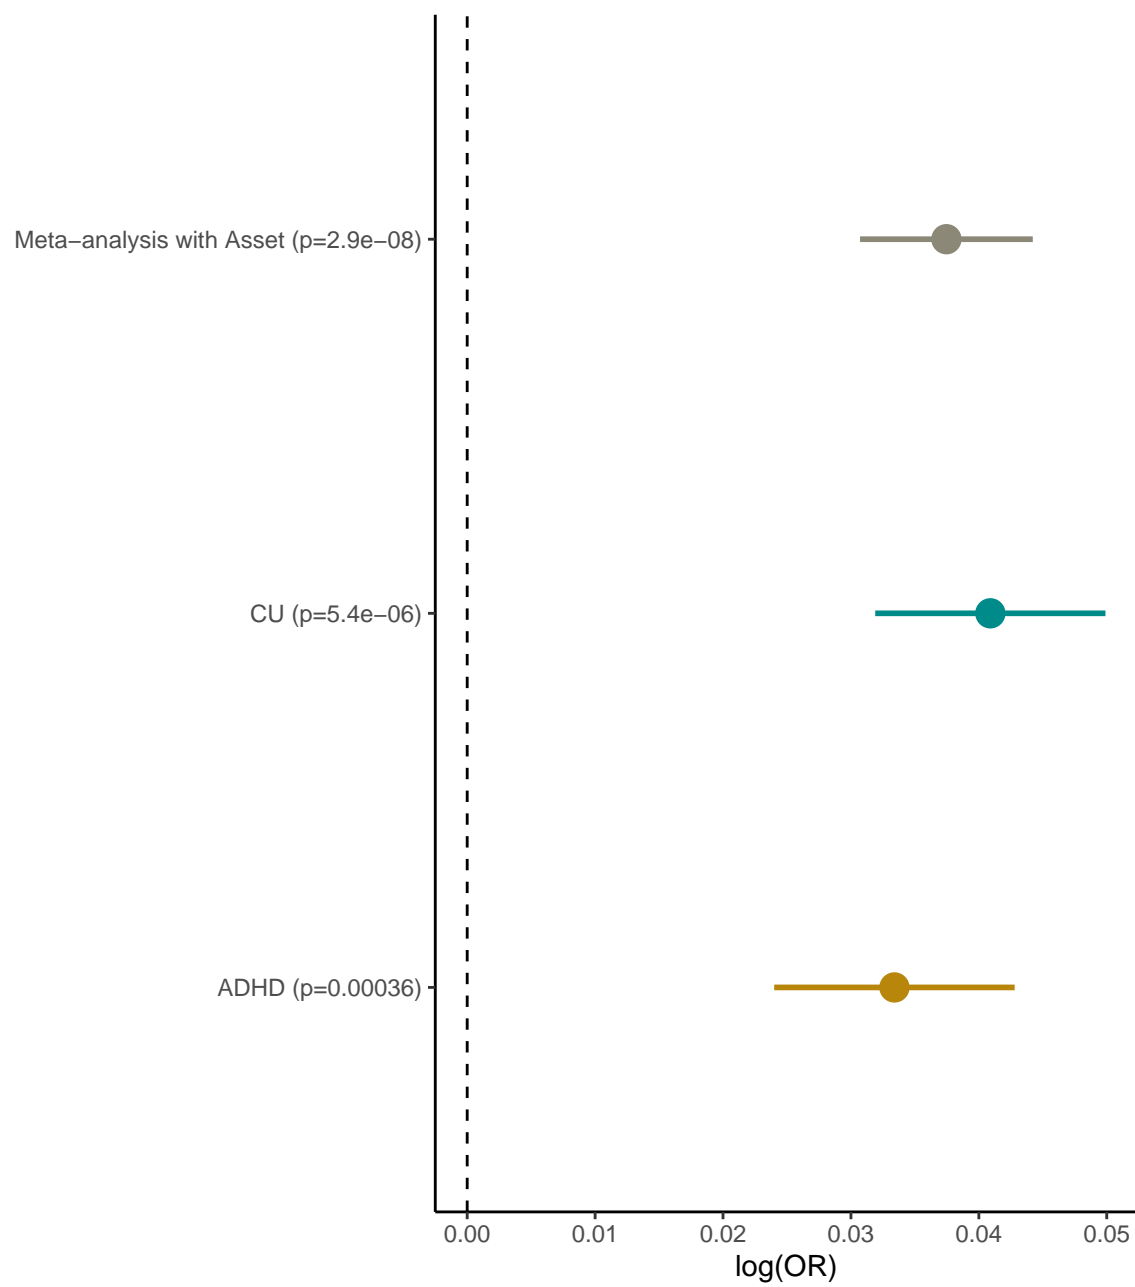

PM-Plot

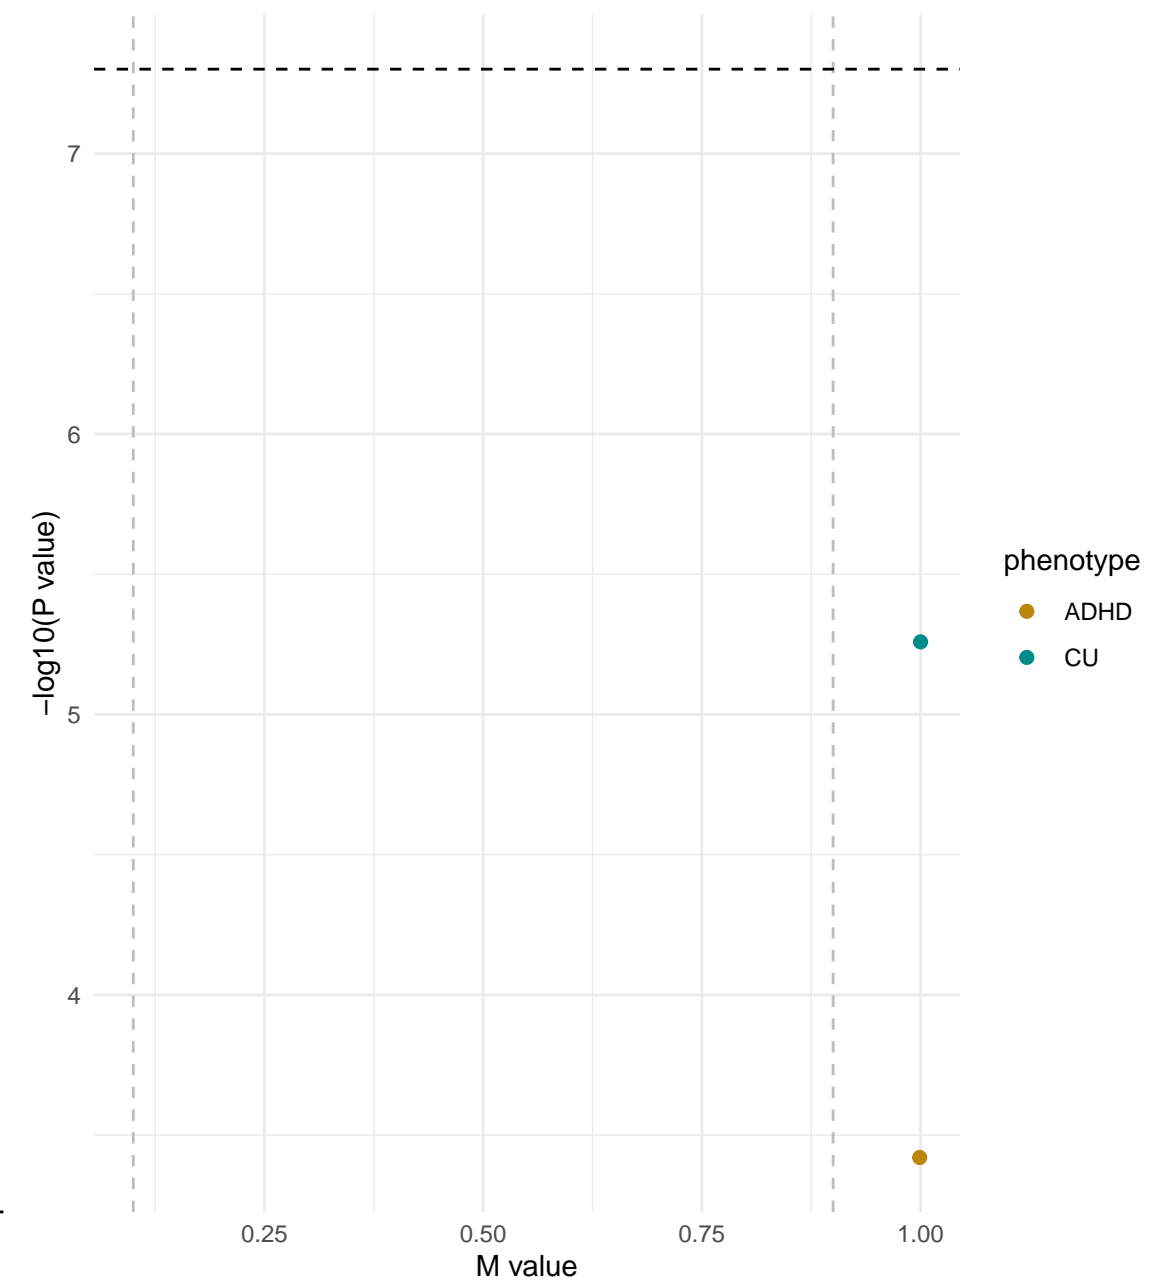

Lead SNP: rs10212155

PM-Plot

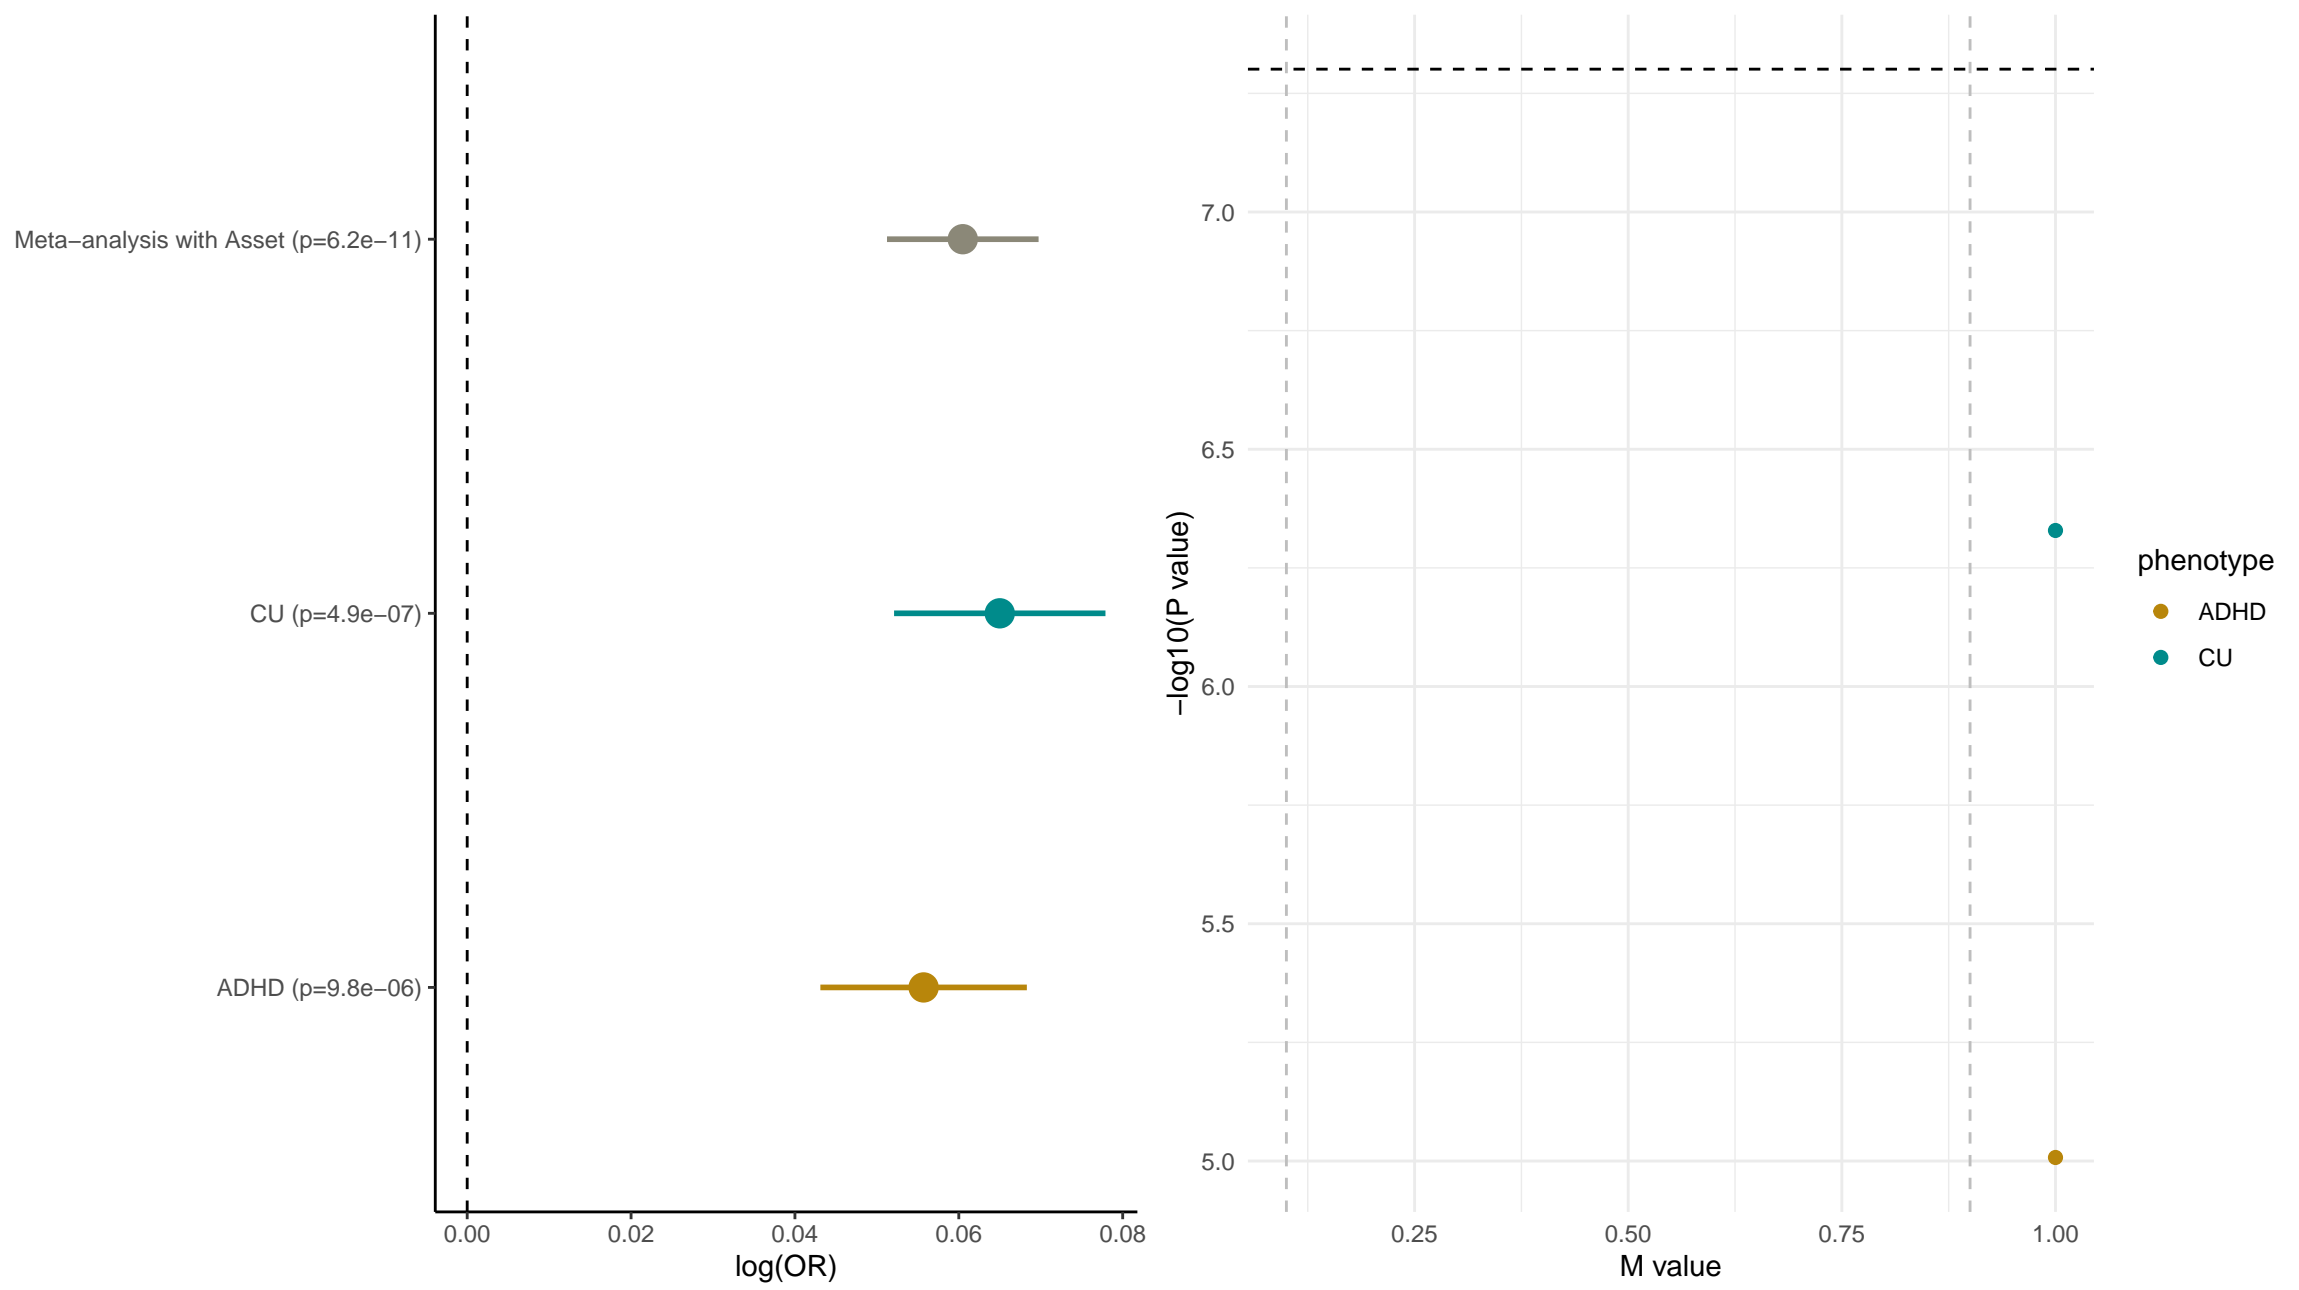



Lead SNP: rs11047209

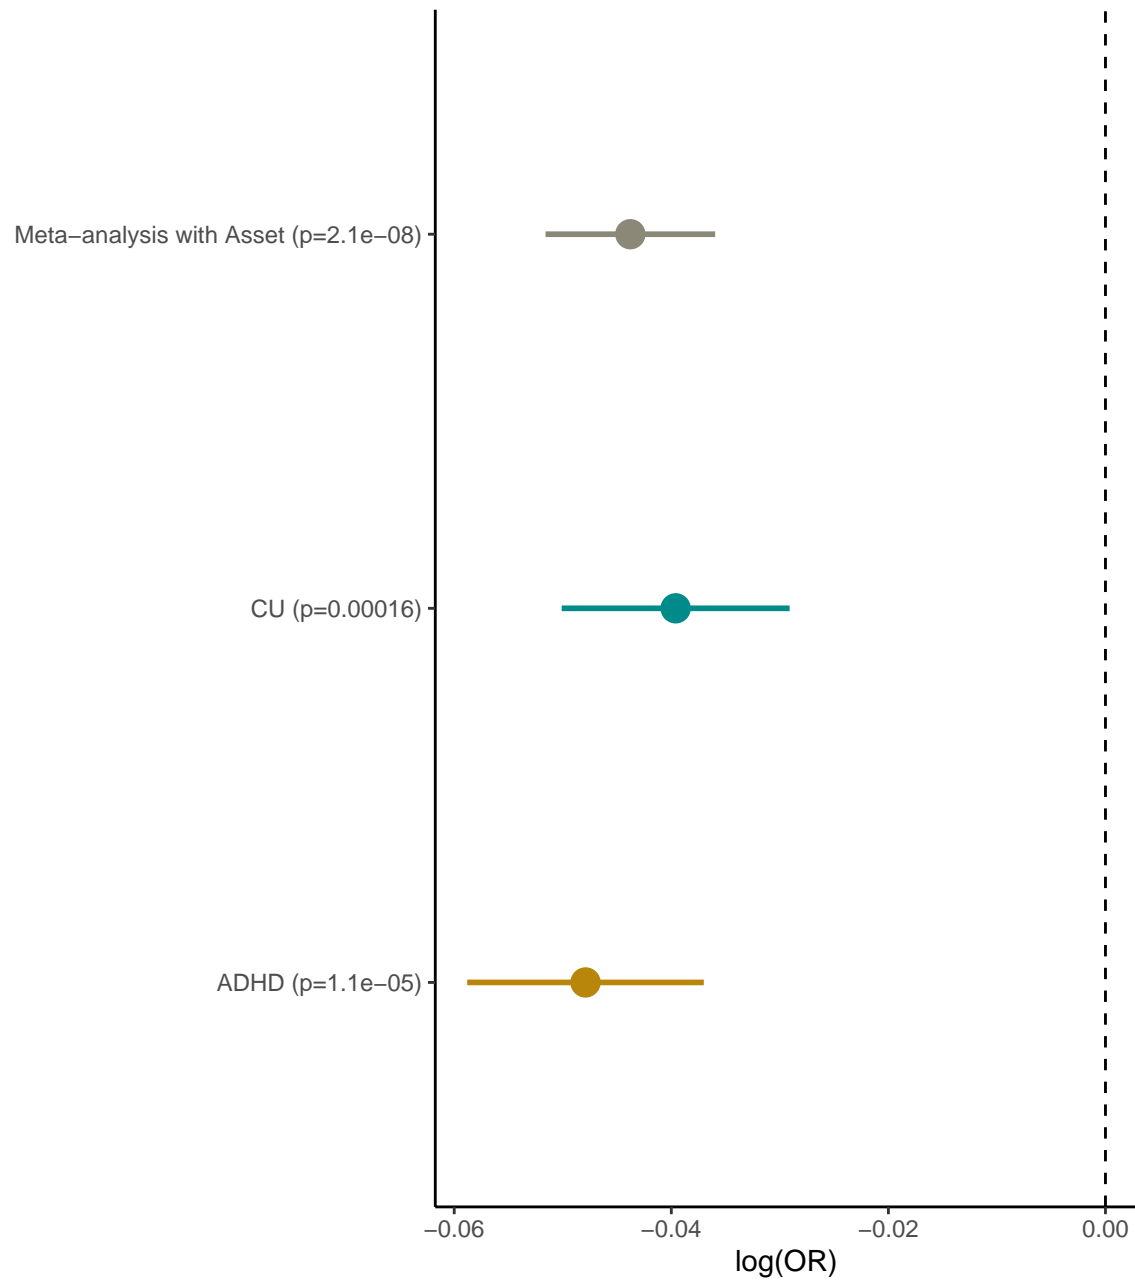

PM-Plot

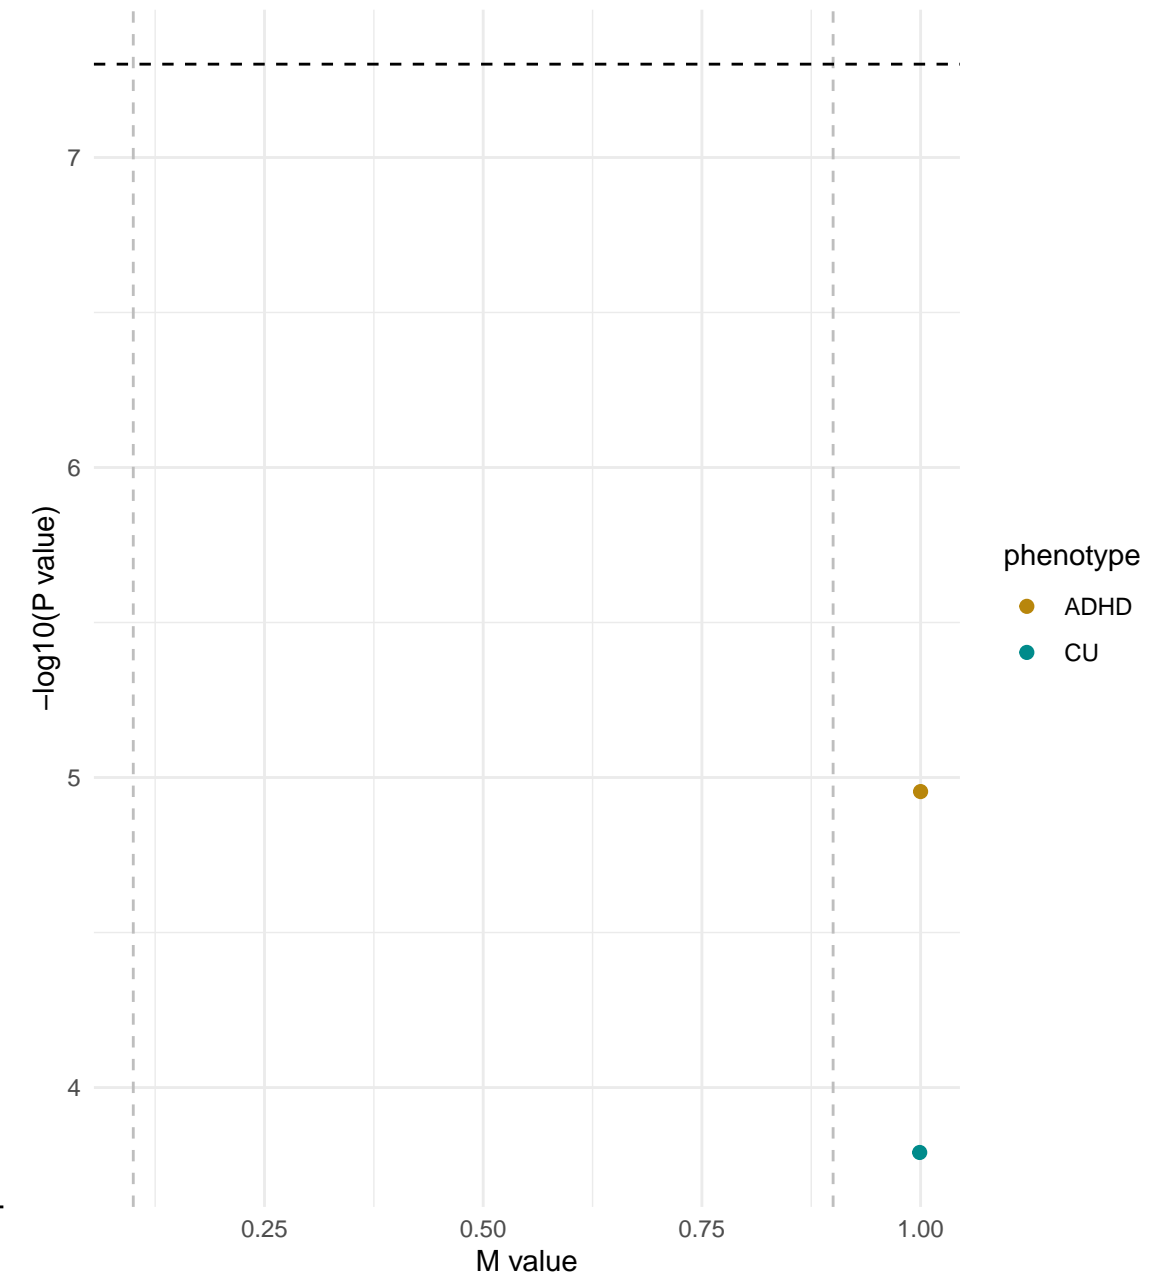

Lead SNP: rs11729080

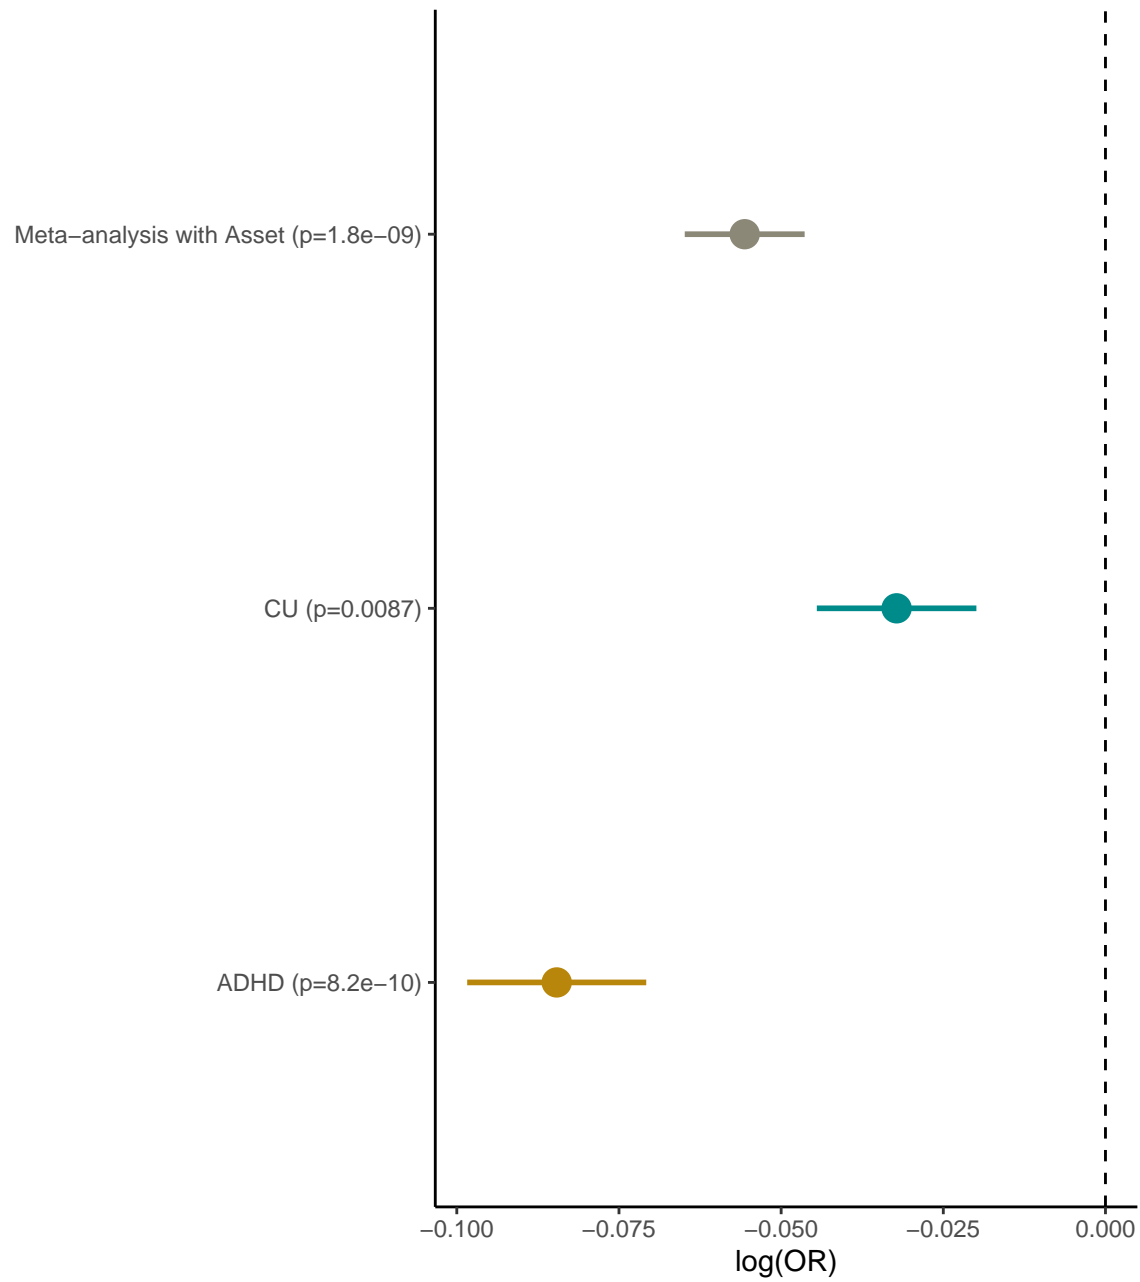

PM-Plot

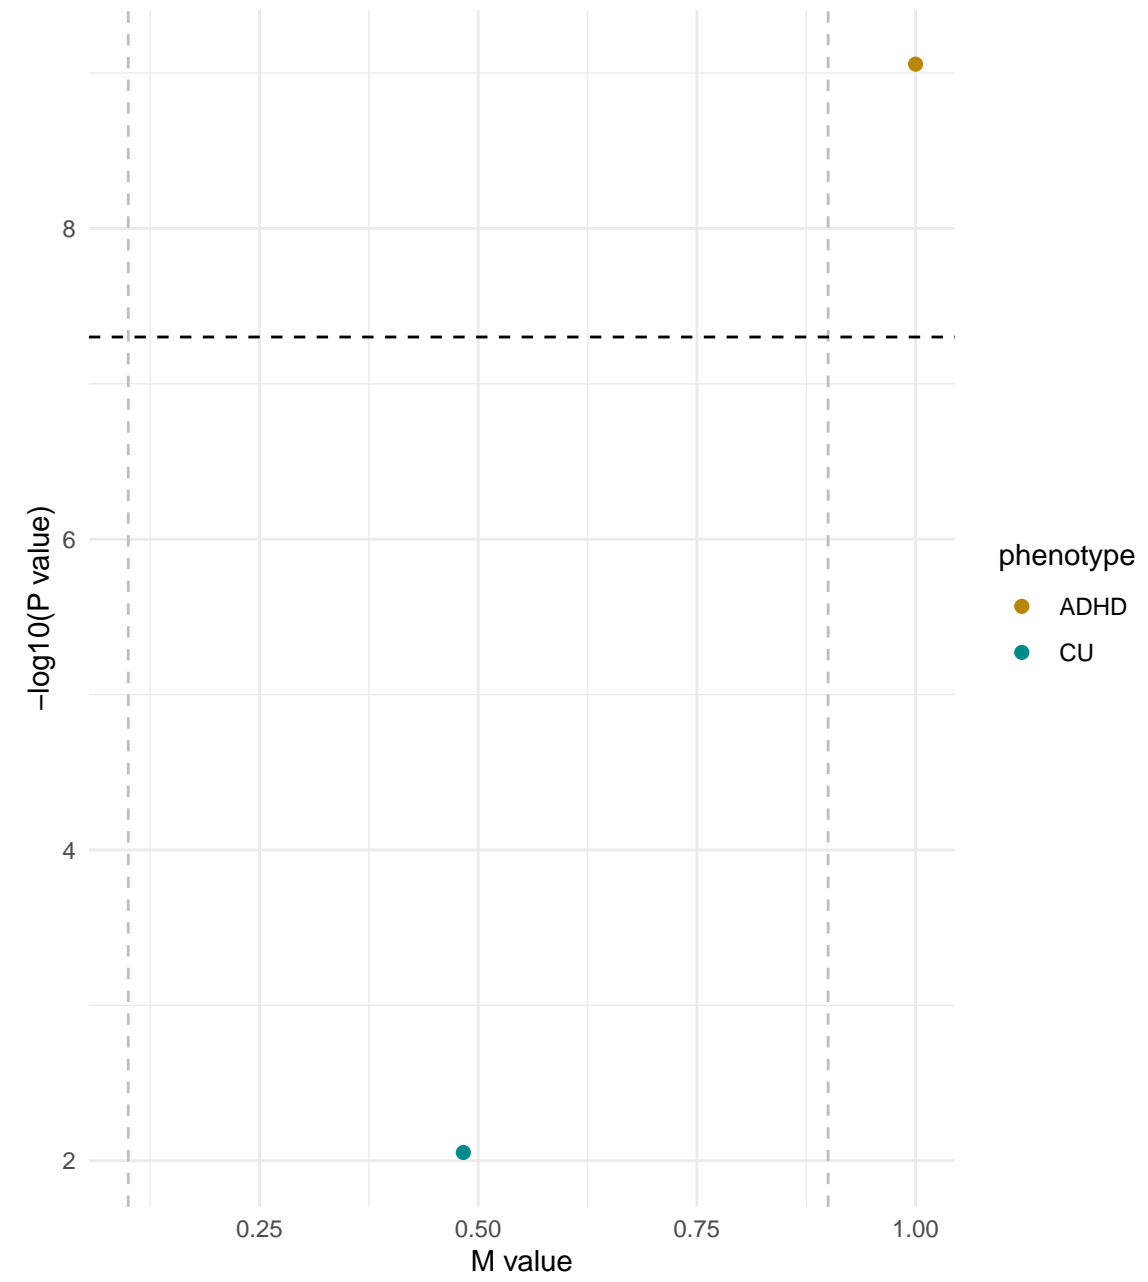

Lead SNP: rs62237504

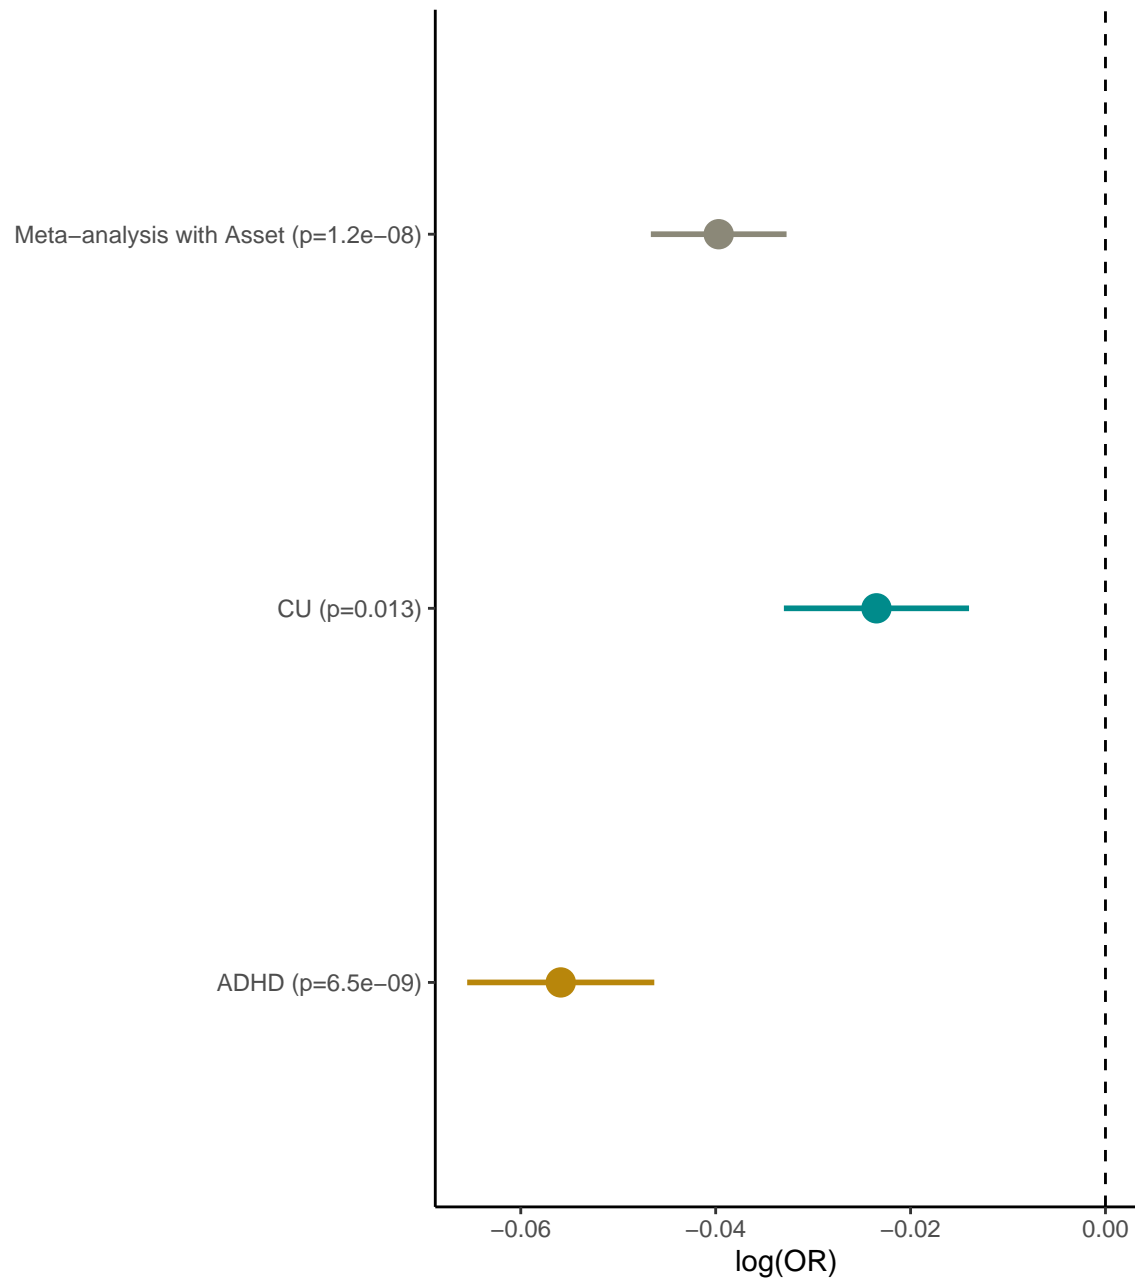

PM-Plot

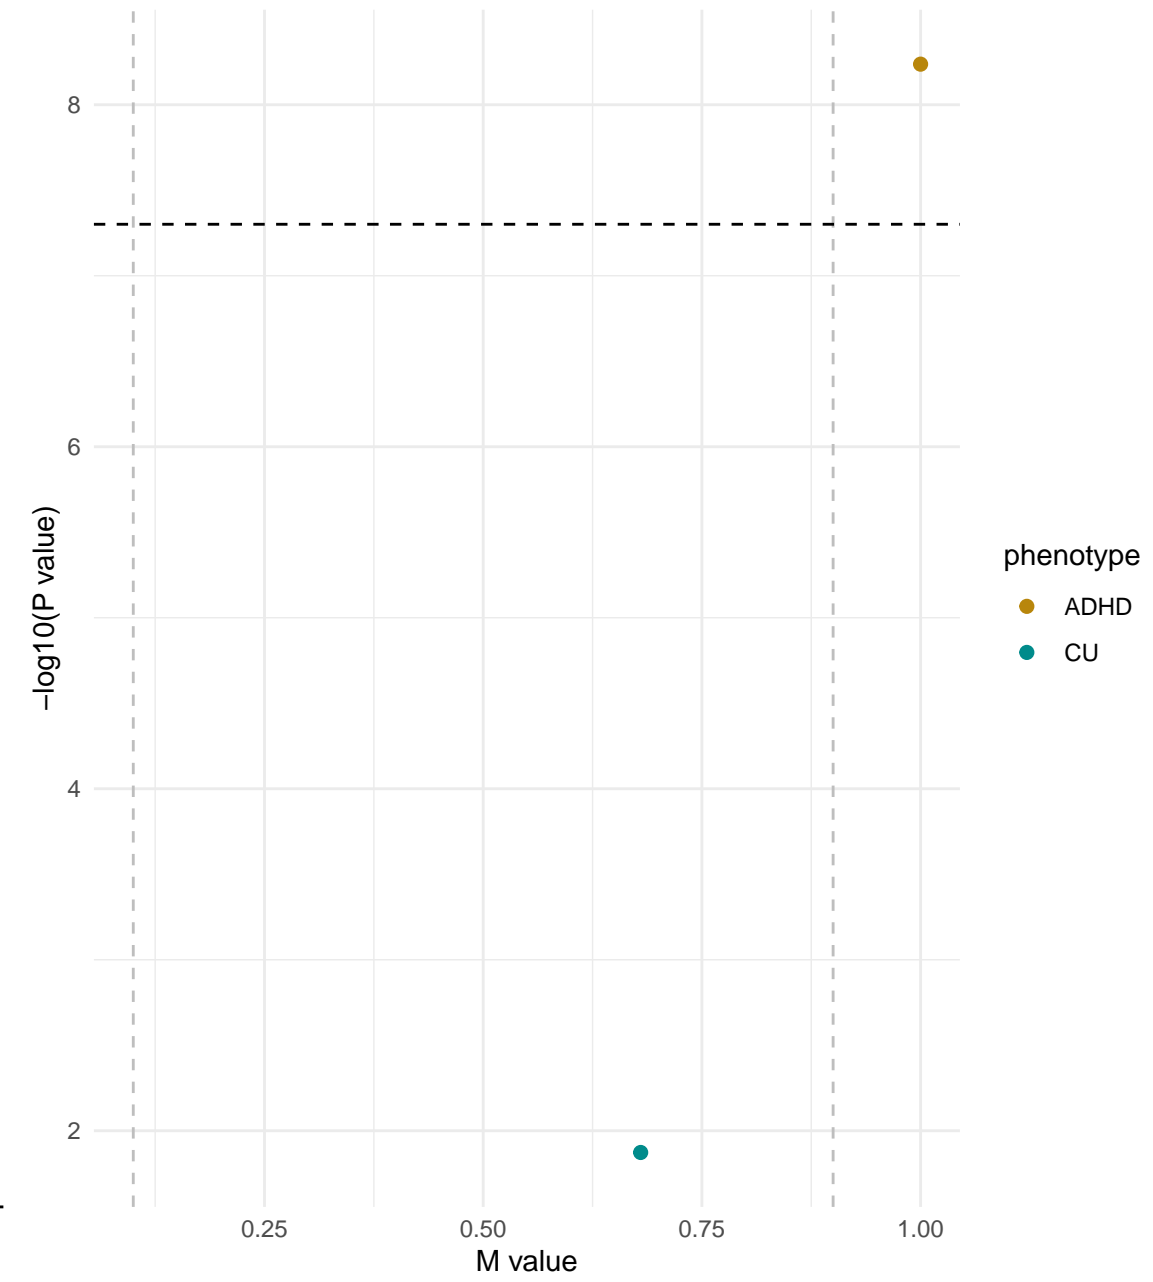

Lead SNP: rs62263912

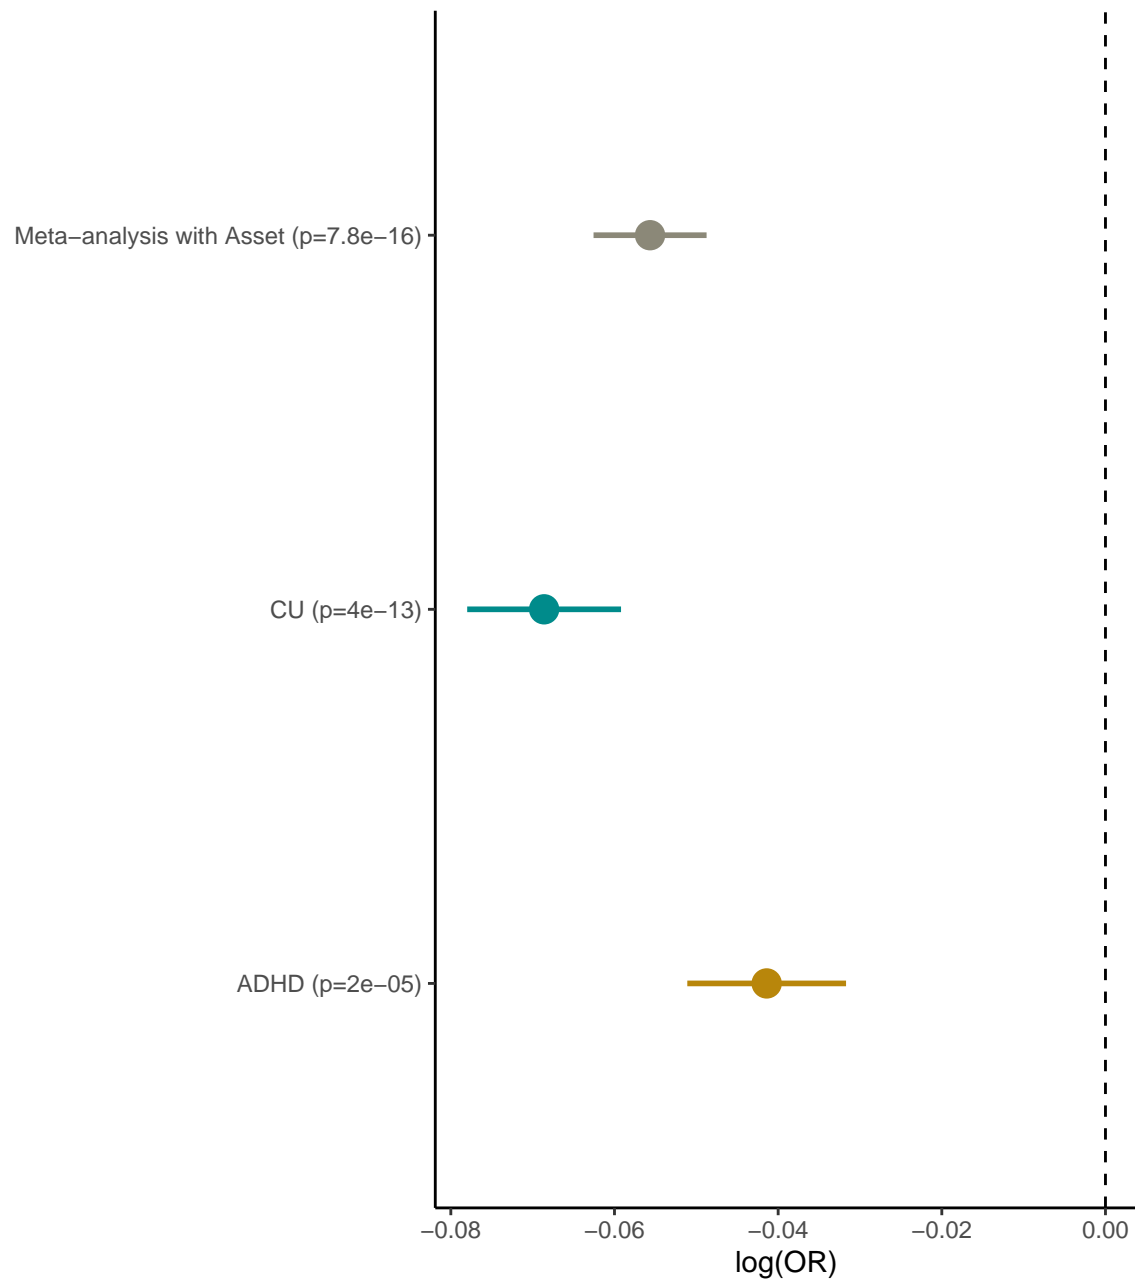

PM-Plot

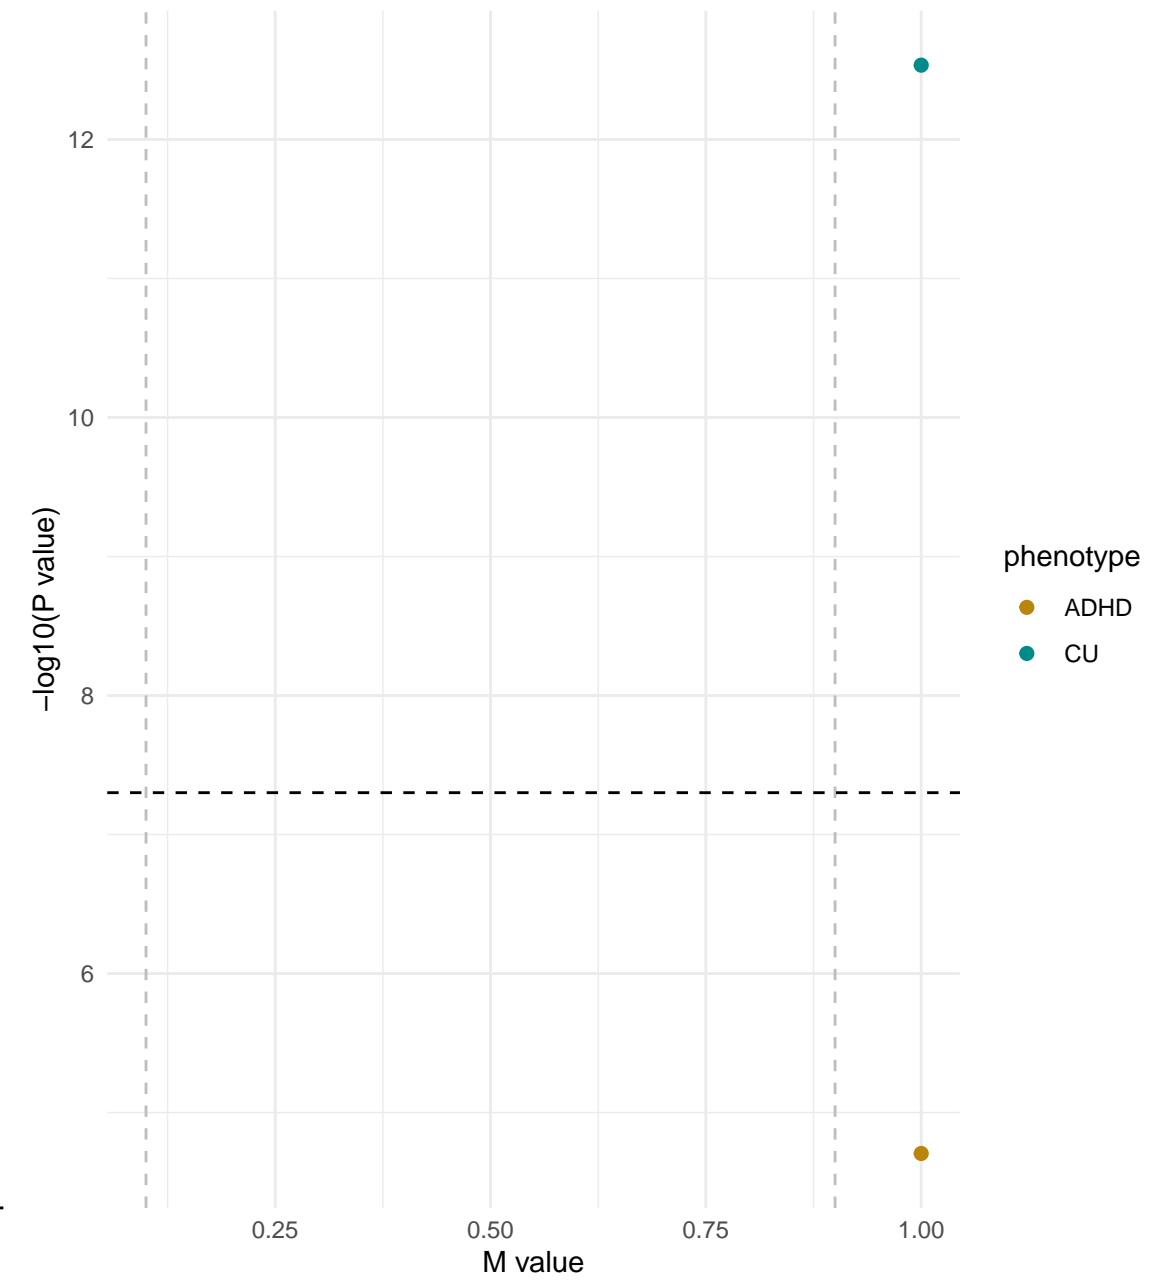

Lead SNP: rs66571810

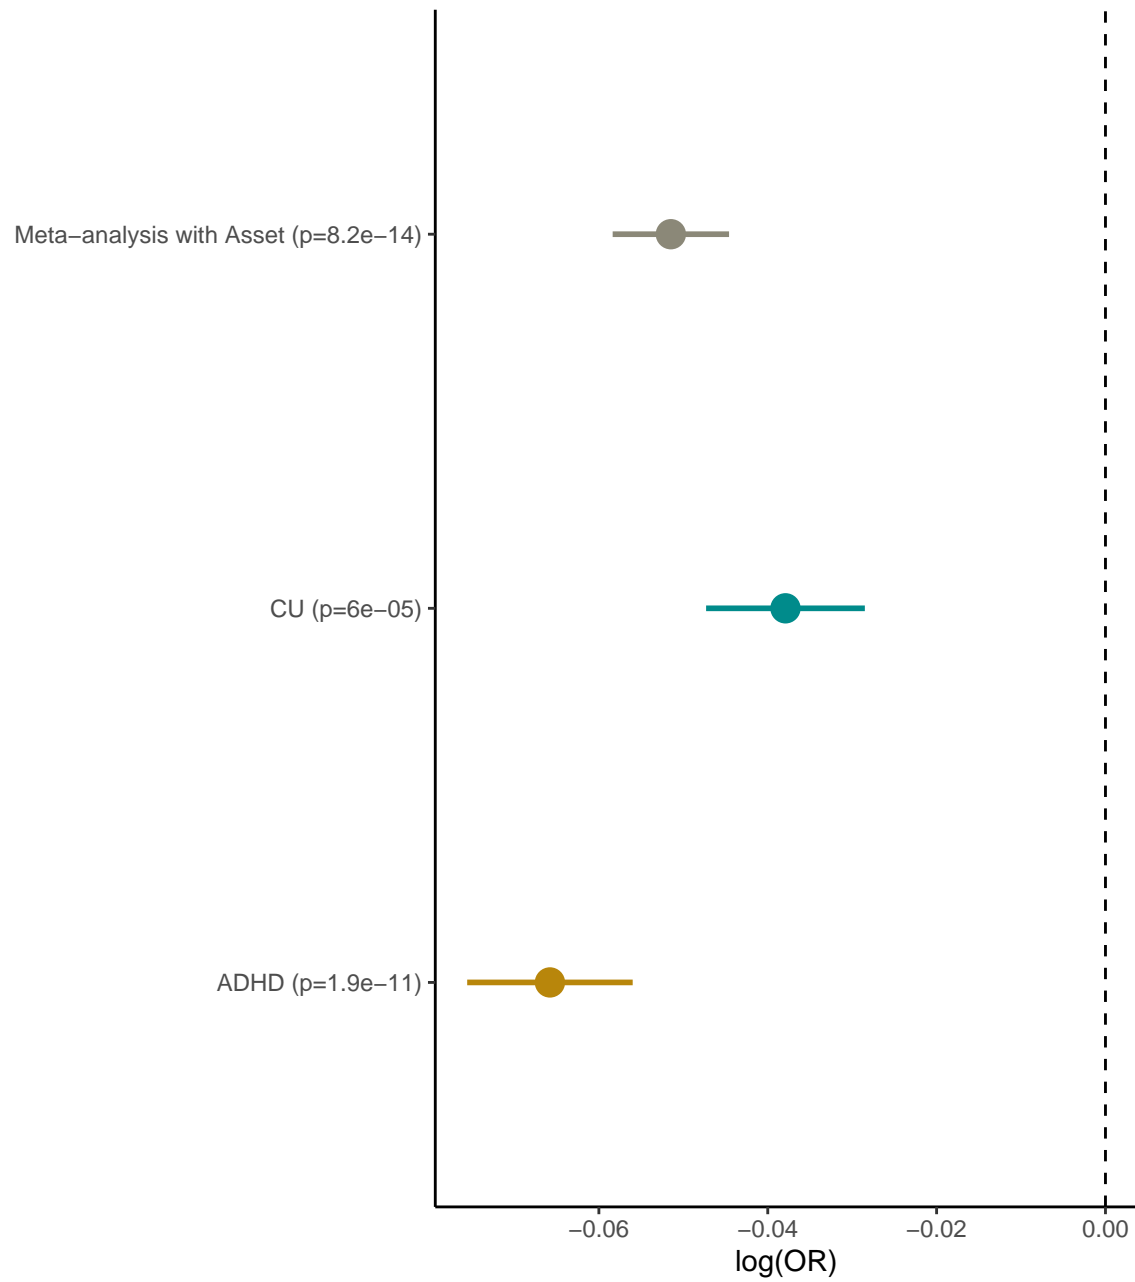

PM-Plot

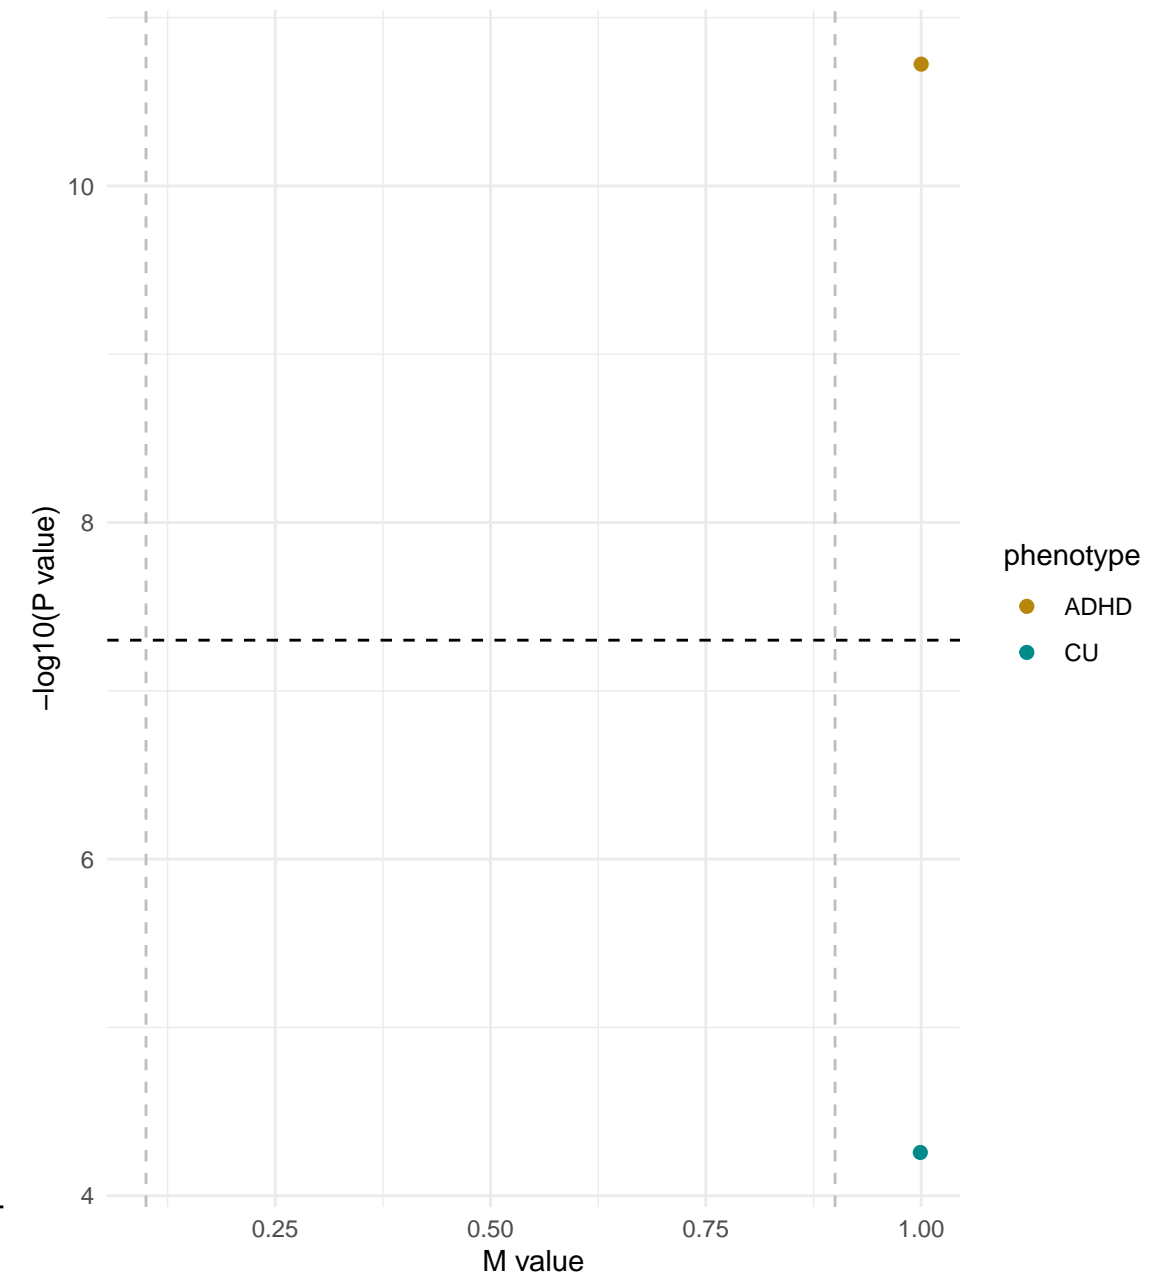

Lead SNP: rs76284431

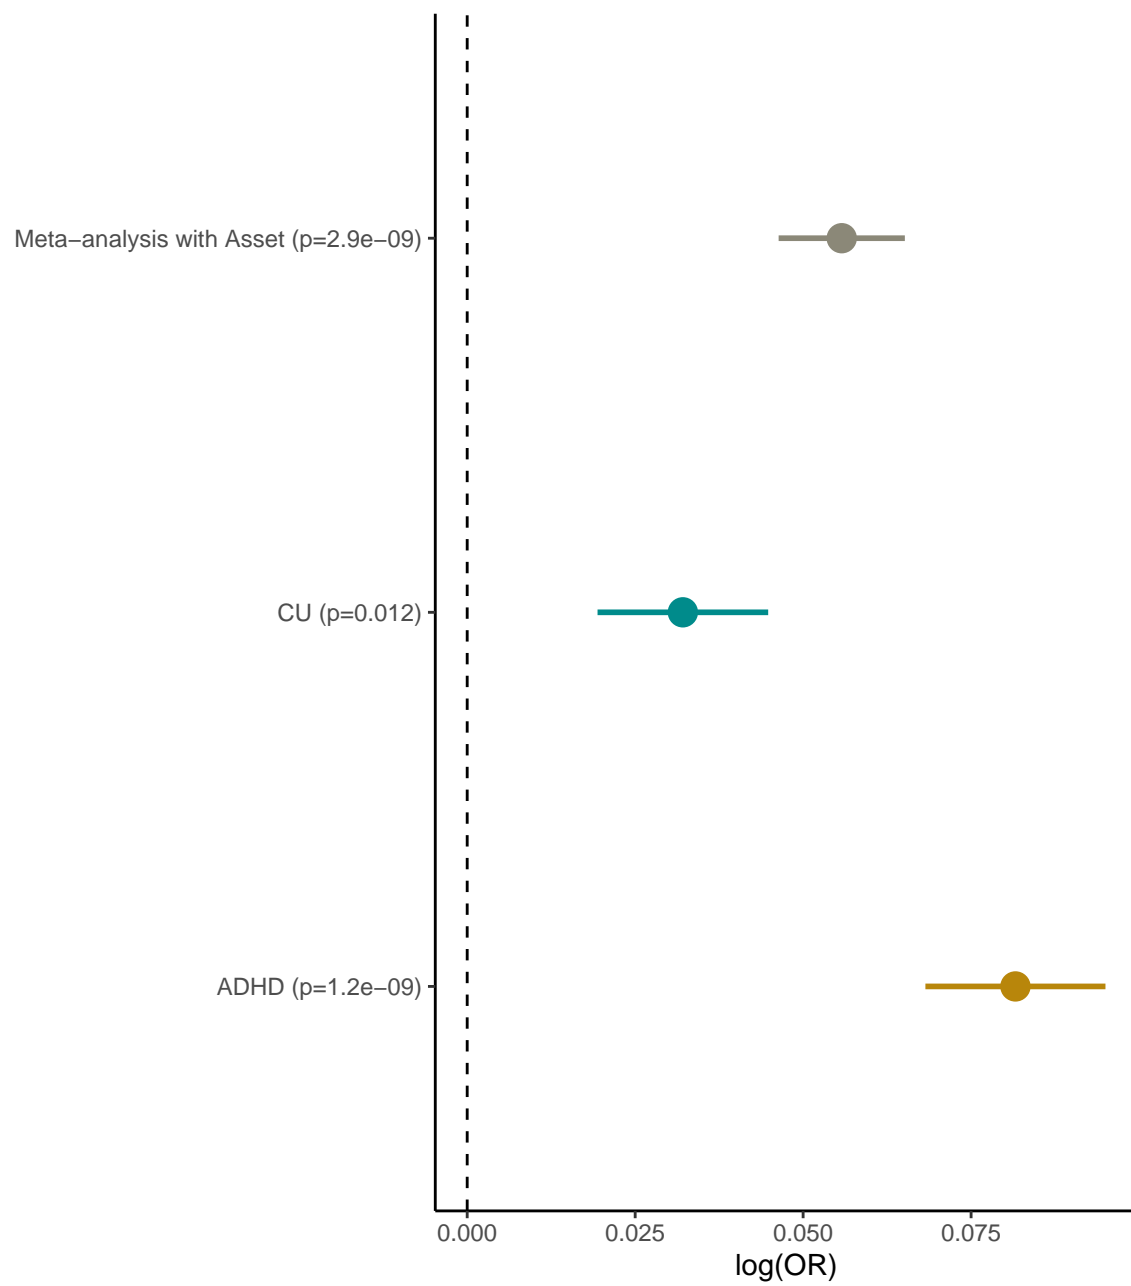

PM-Plot

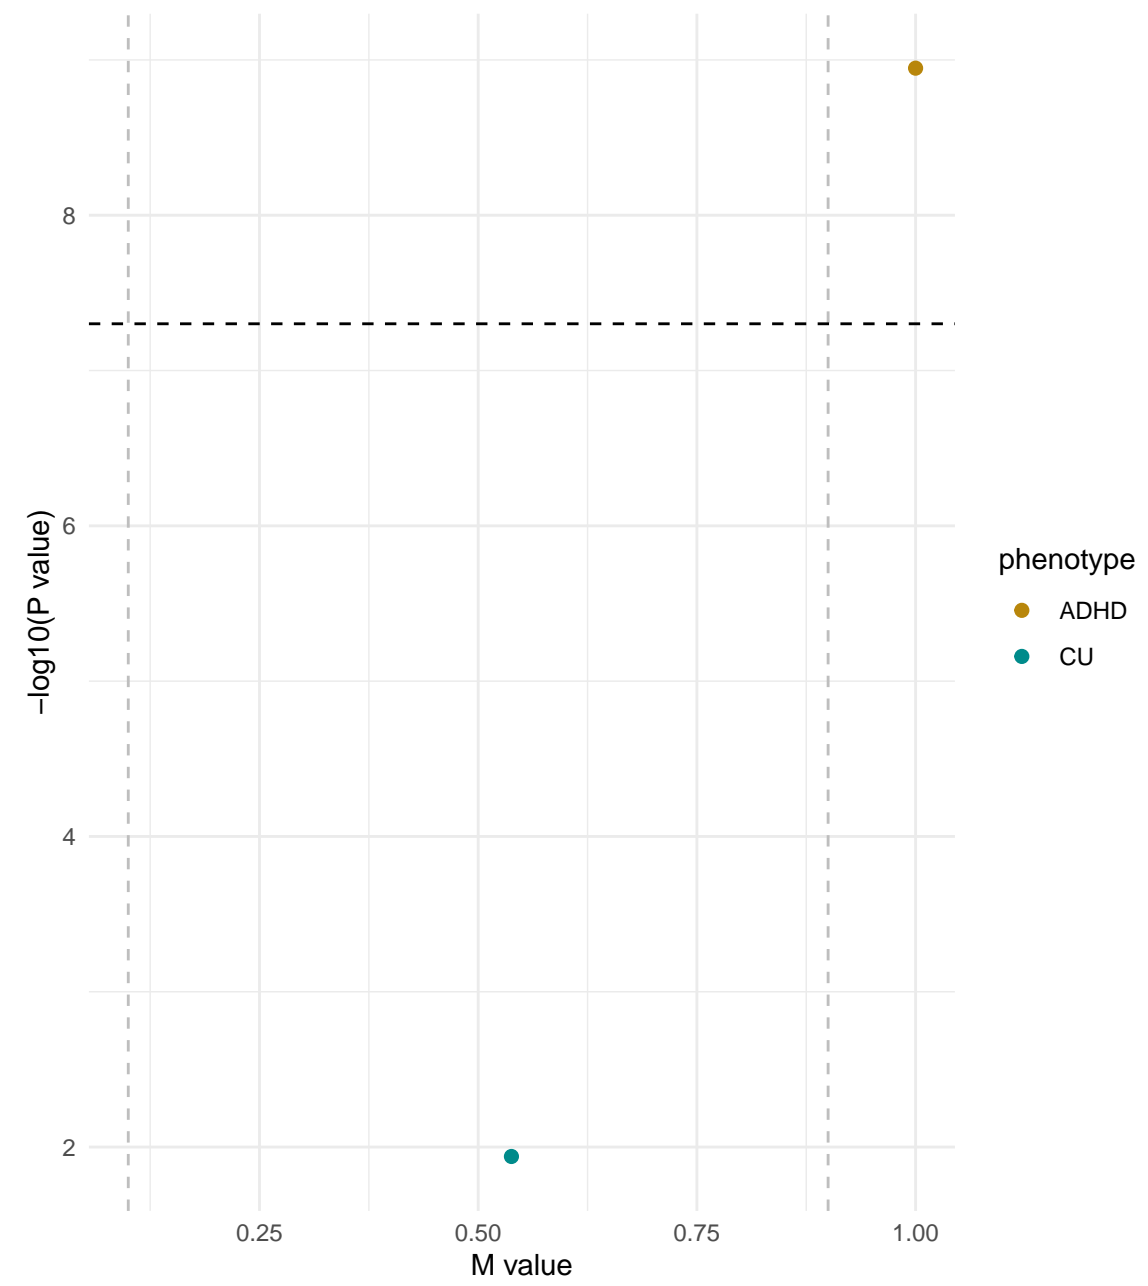

Lead SNP: rs4702

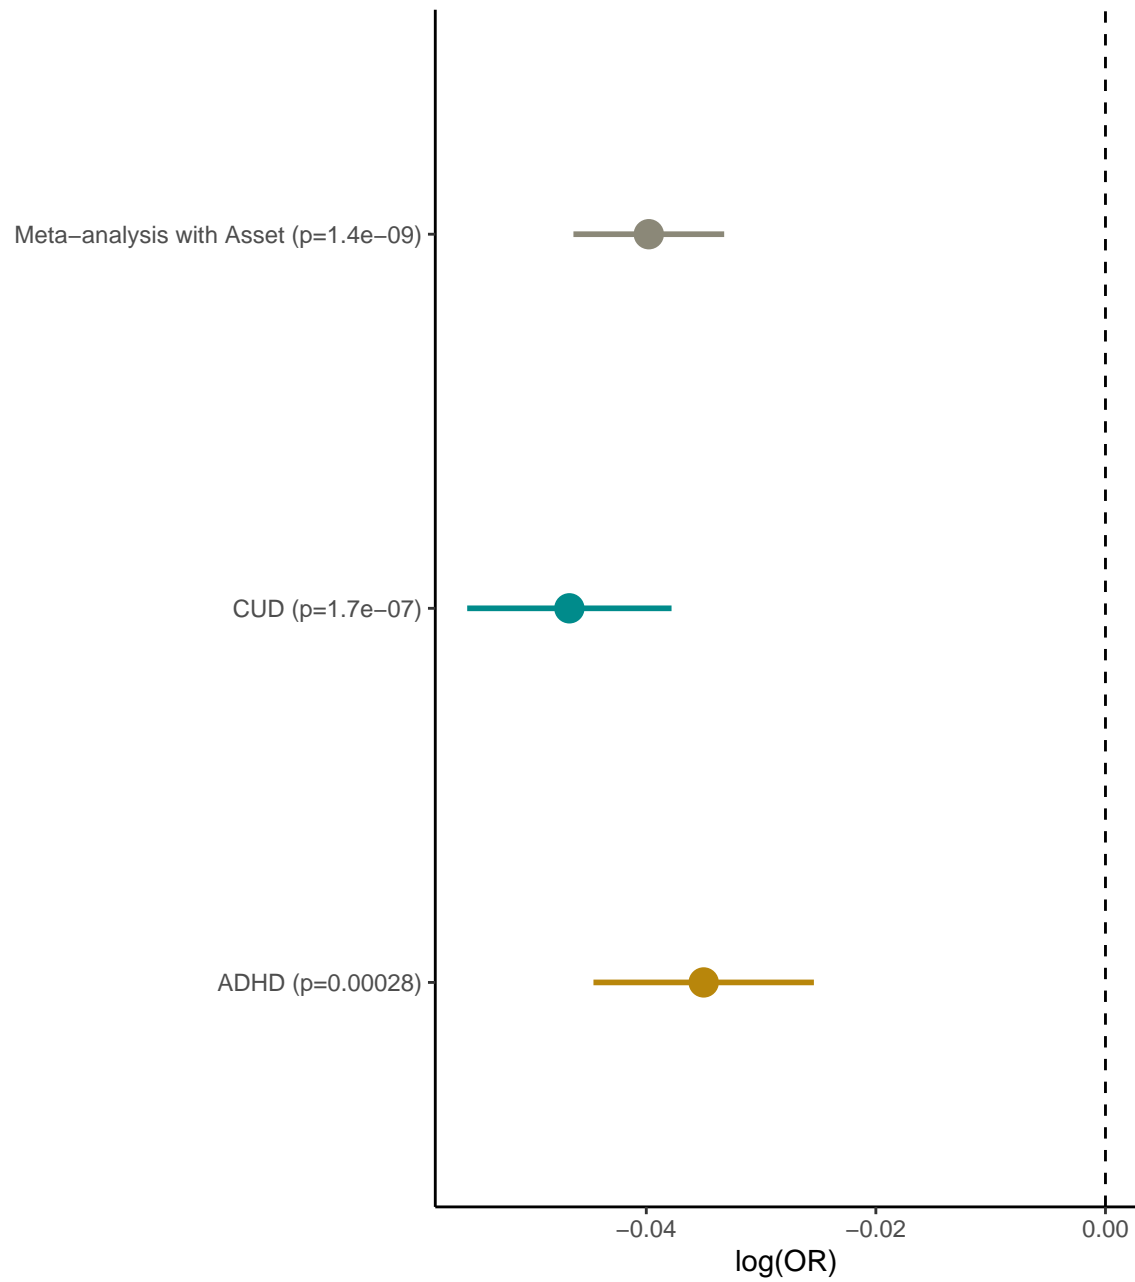

PM-Plot

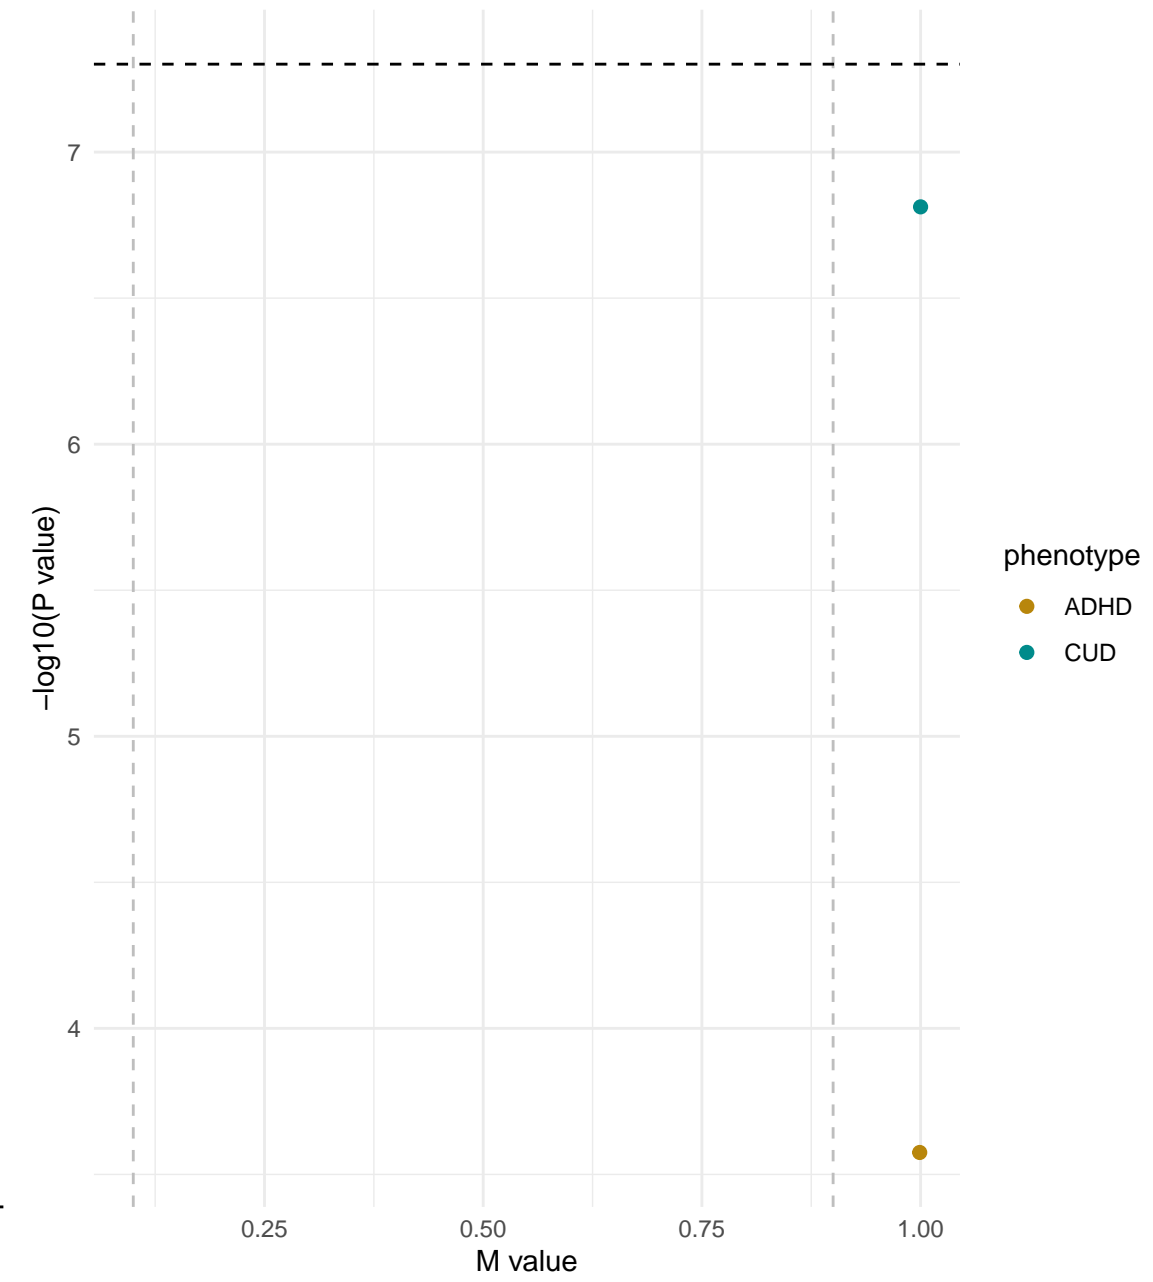

Lead SNP: rs158179

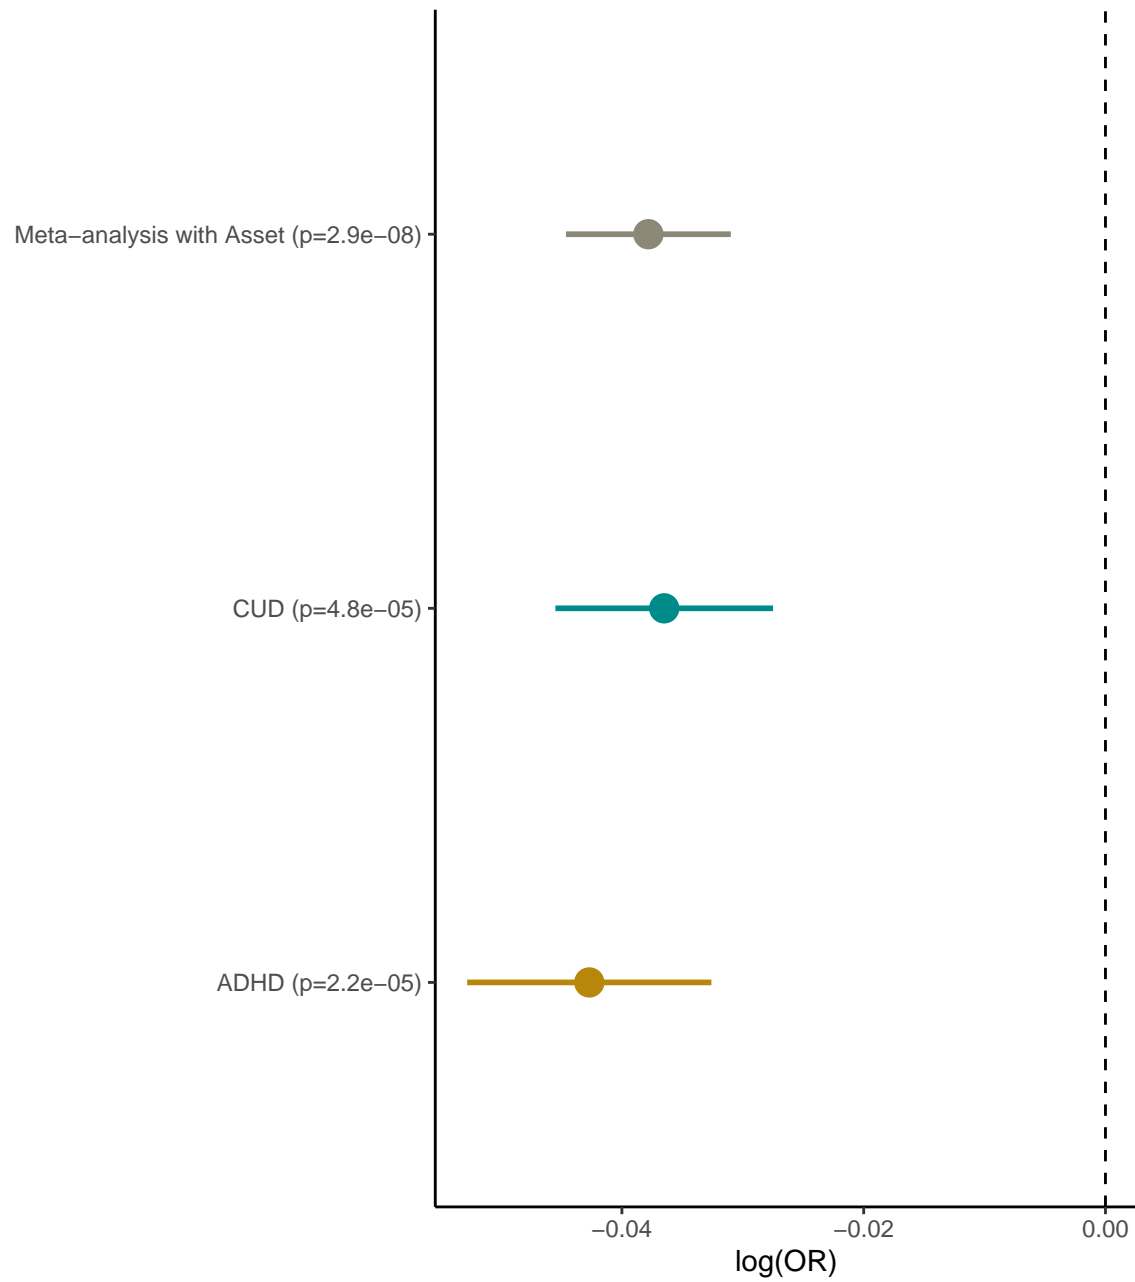

PM-Plot

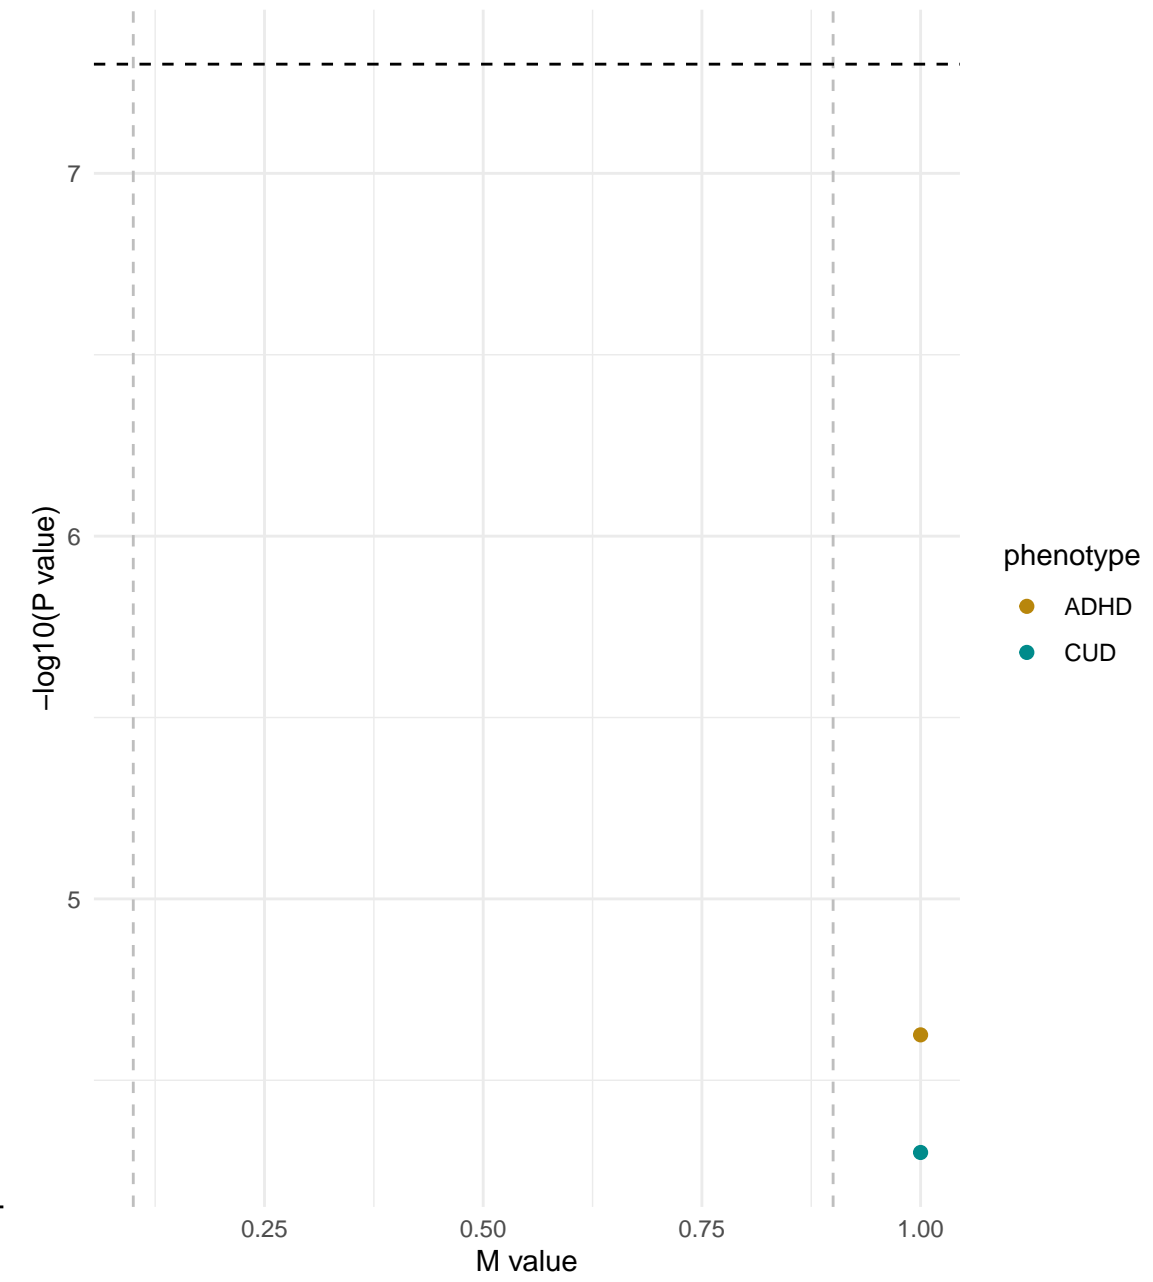



Lead SNP: rs283466

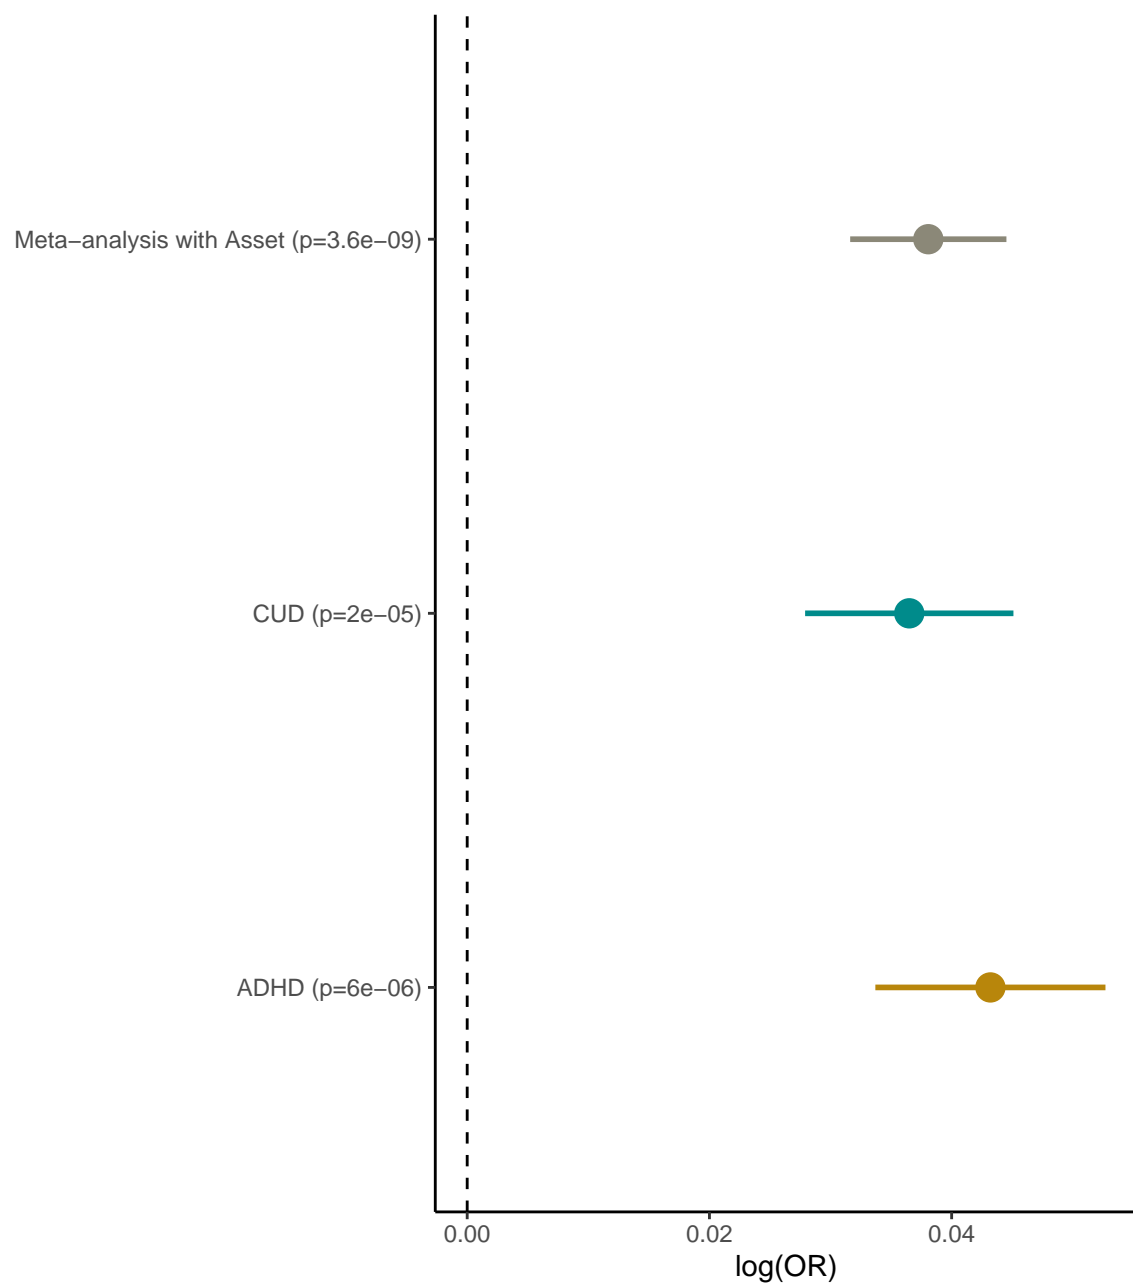

PM-Plot

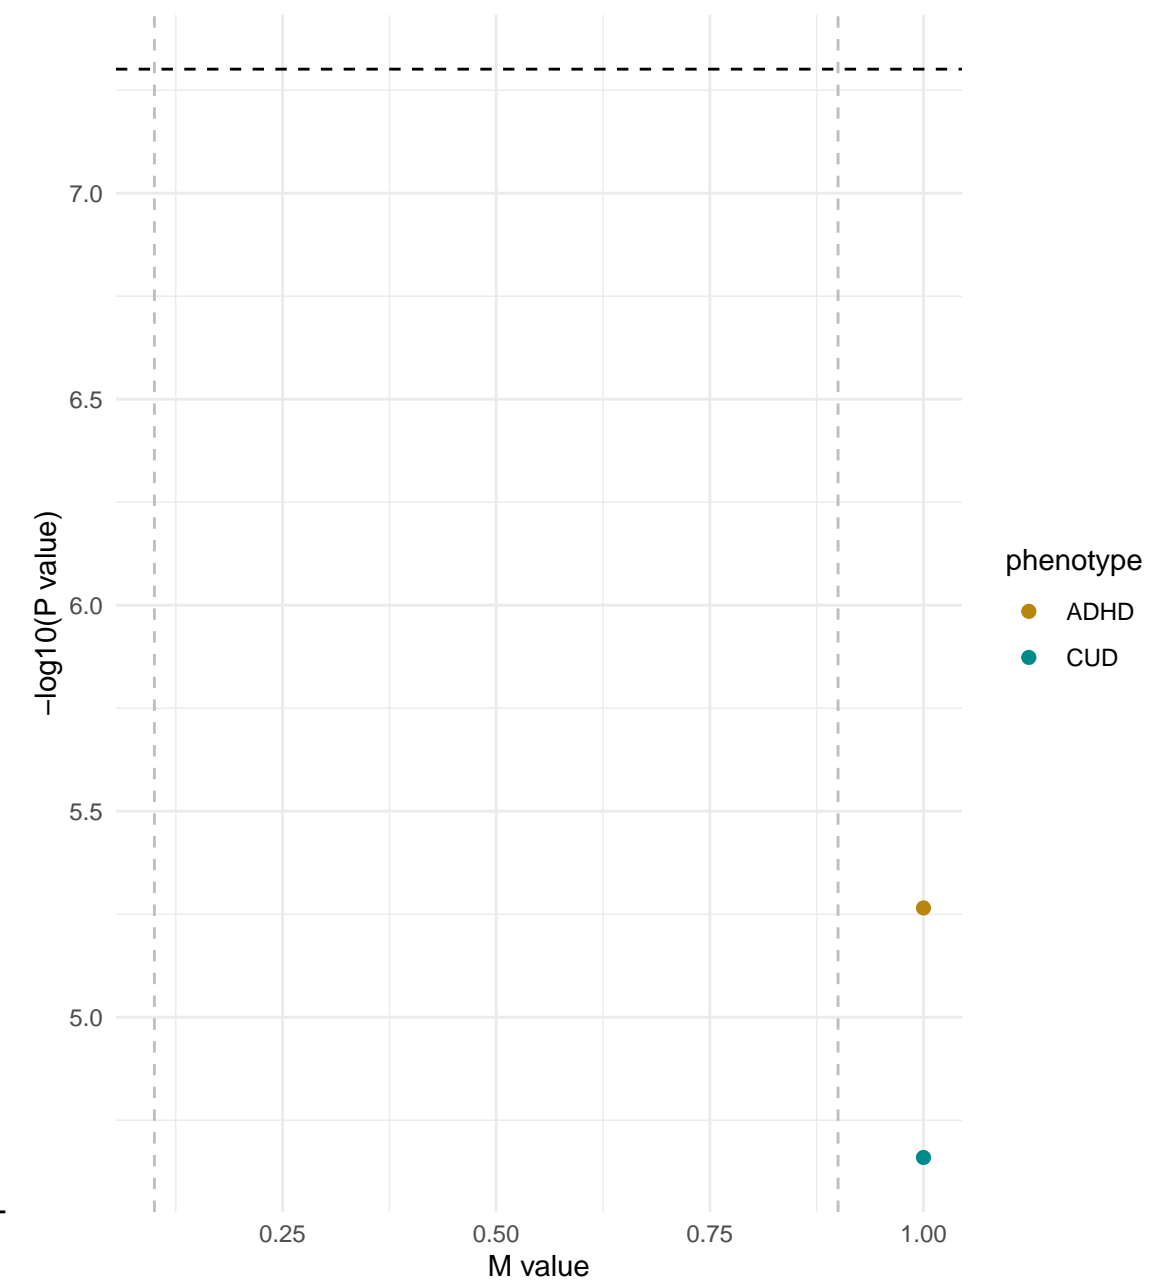

Lead SNP: rs303723

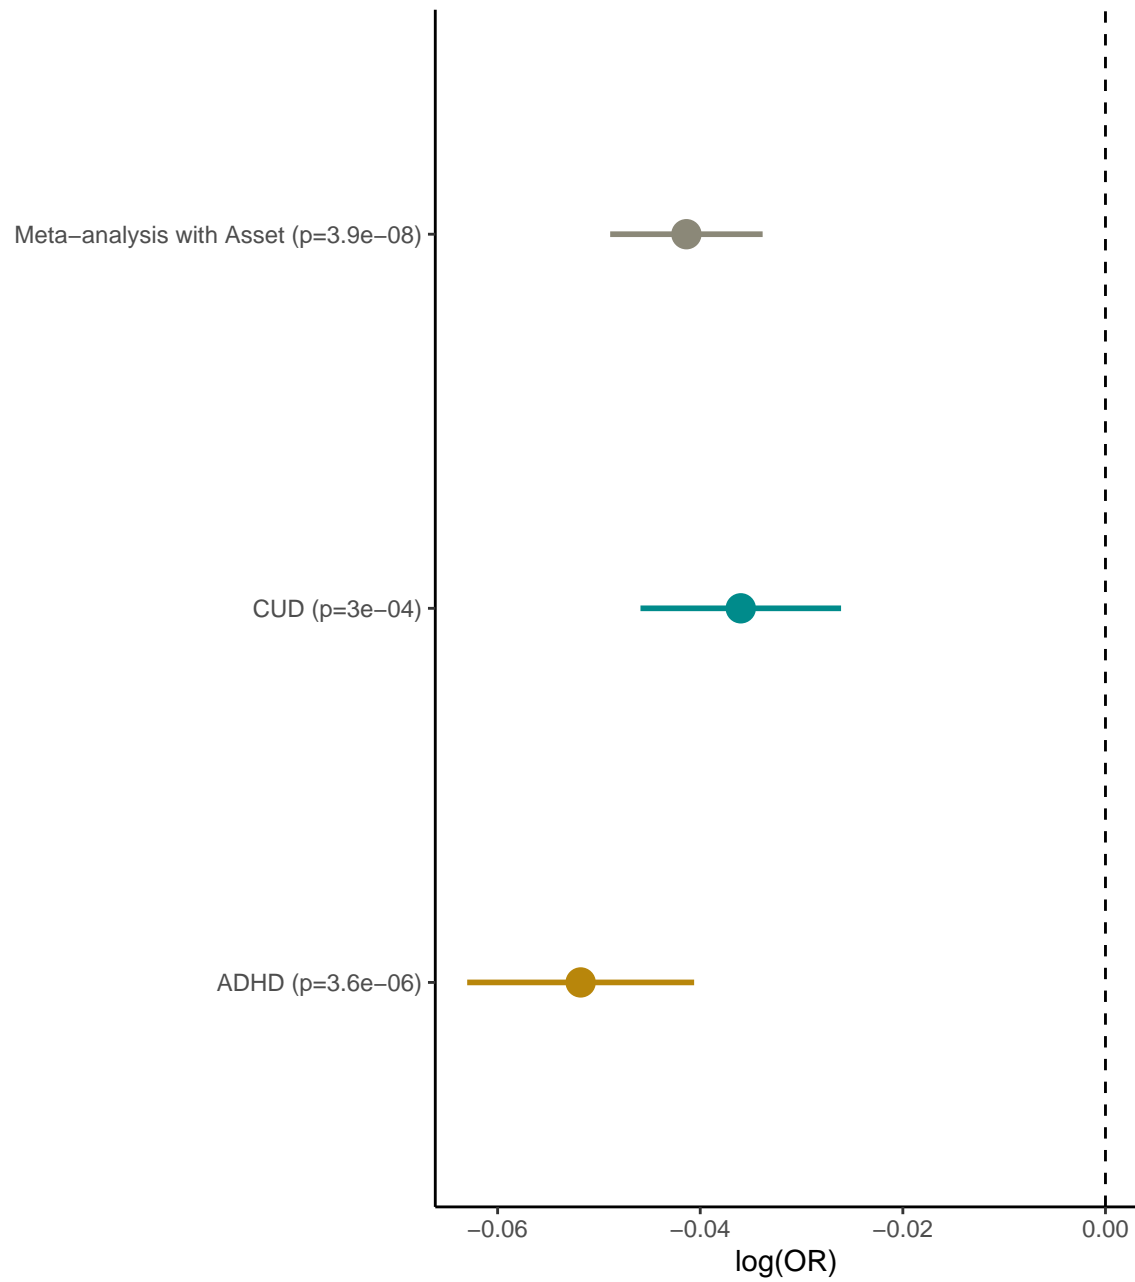

PM-Plot

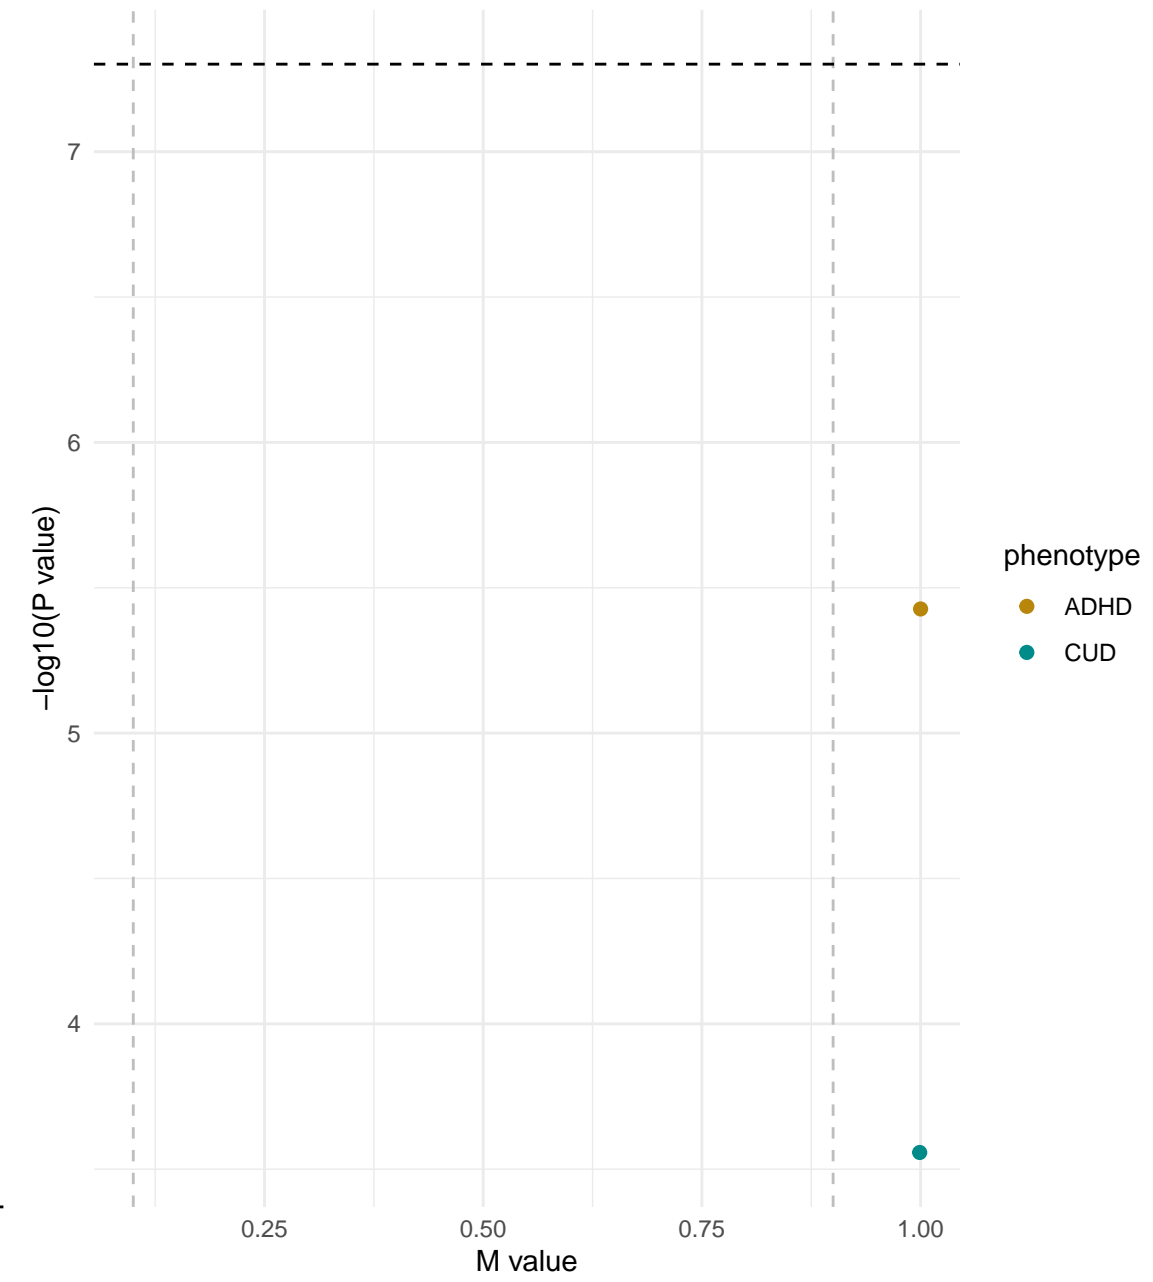

Lead SNP: rs549845

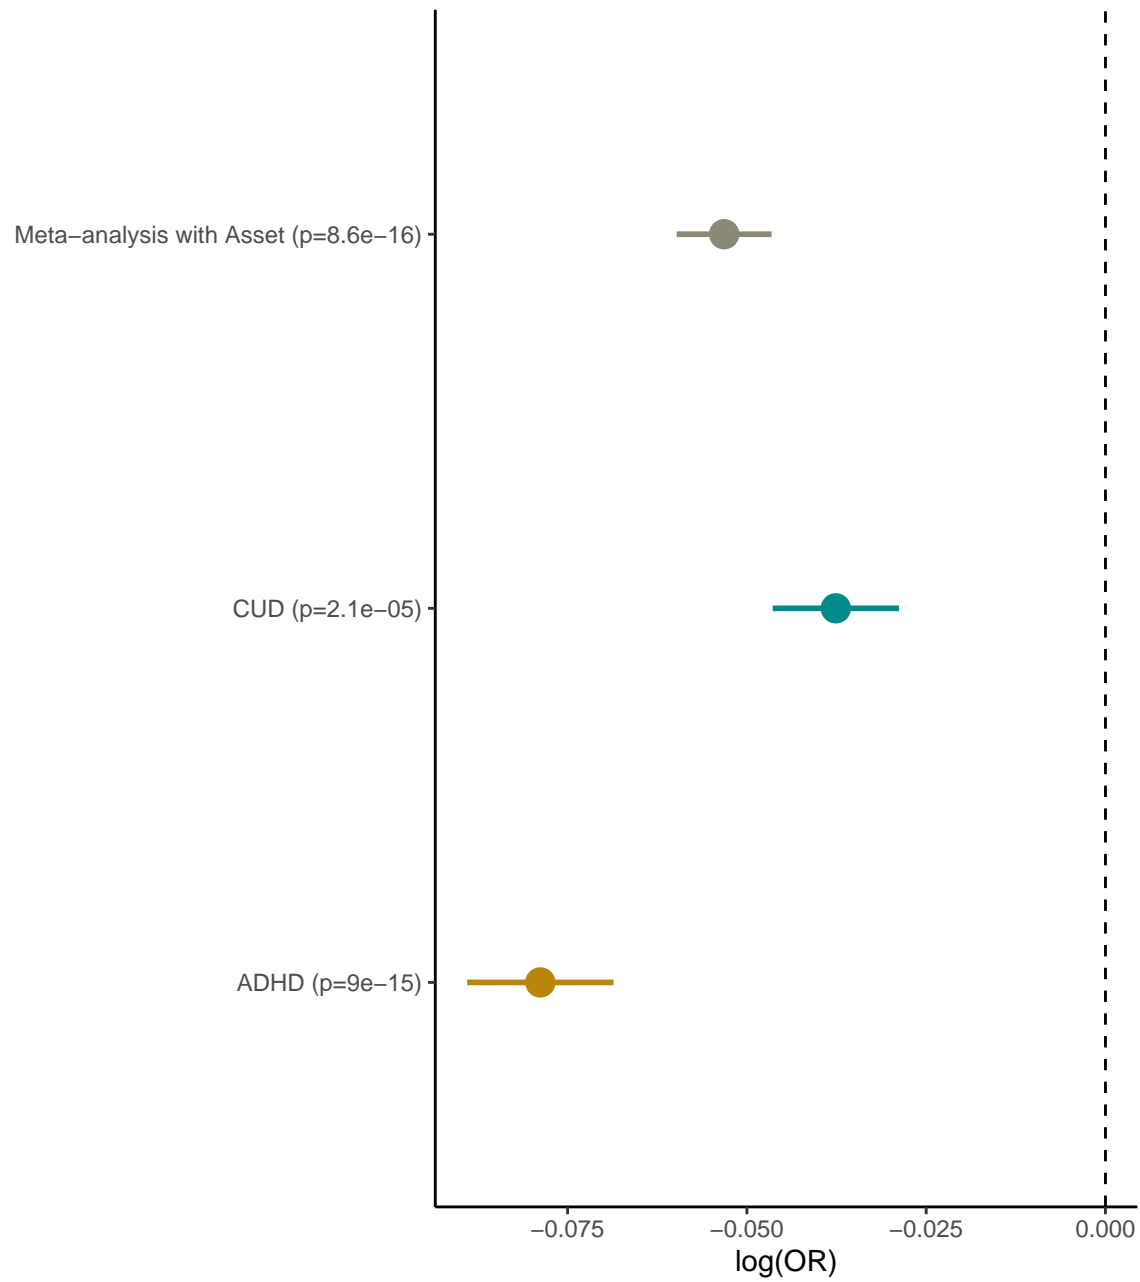

PM-Plot

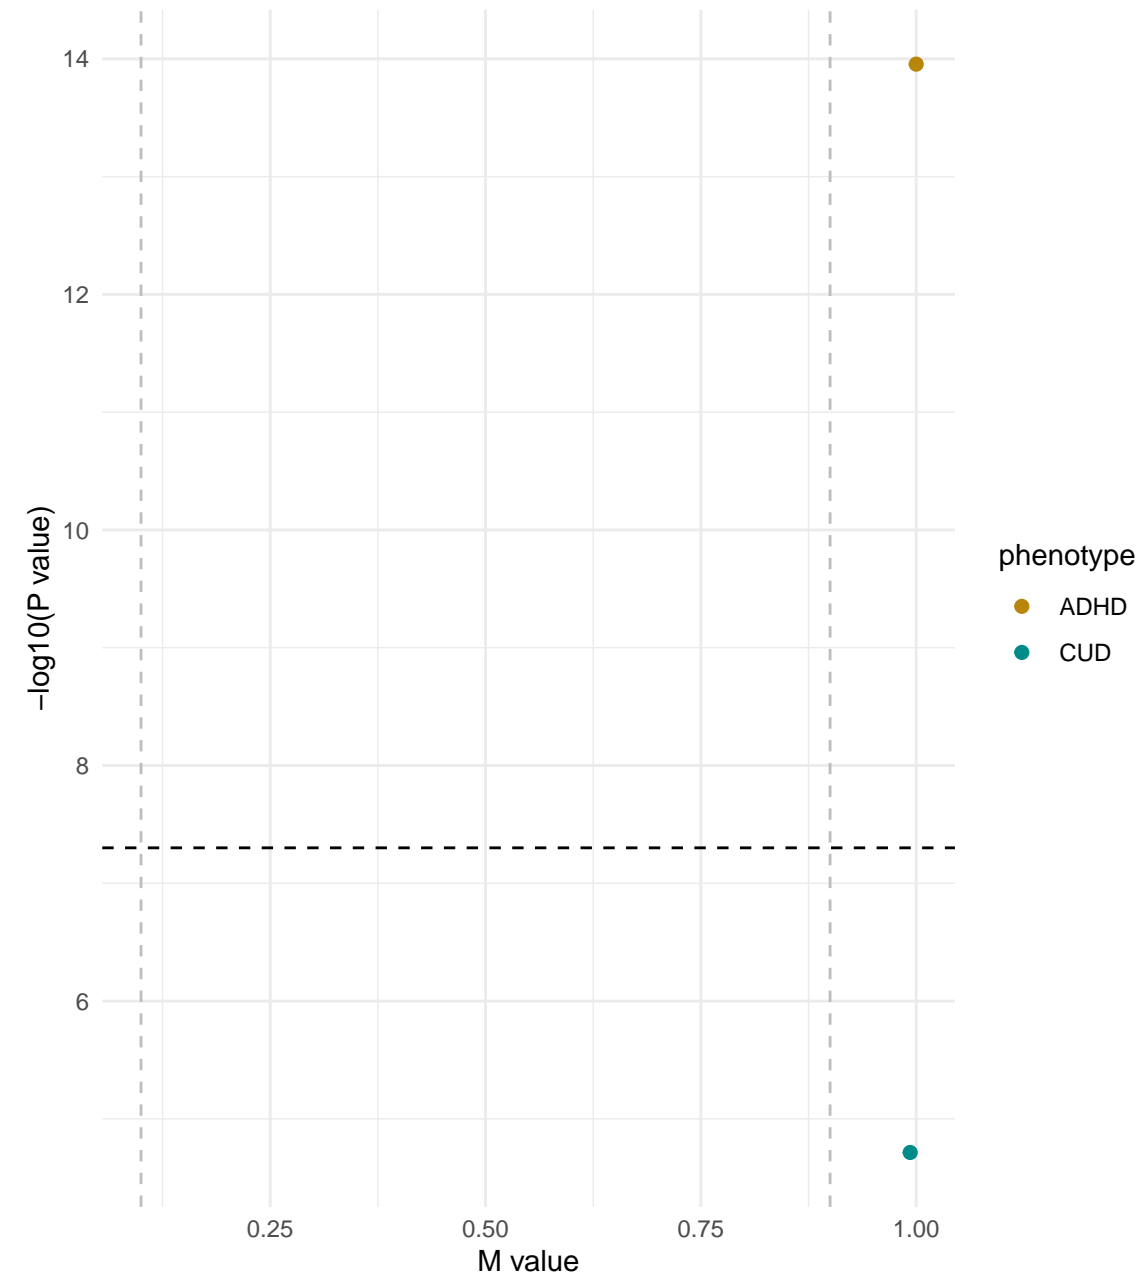

Lead SNP: rs850278

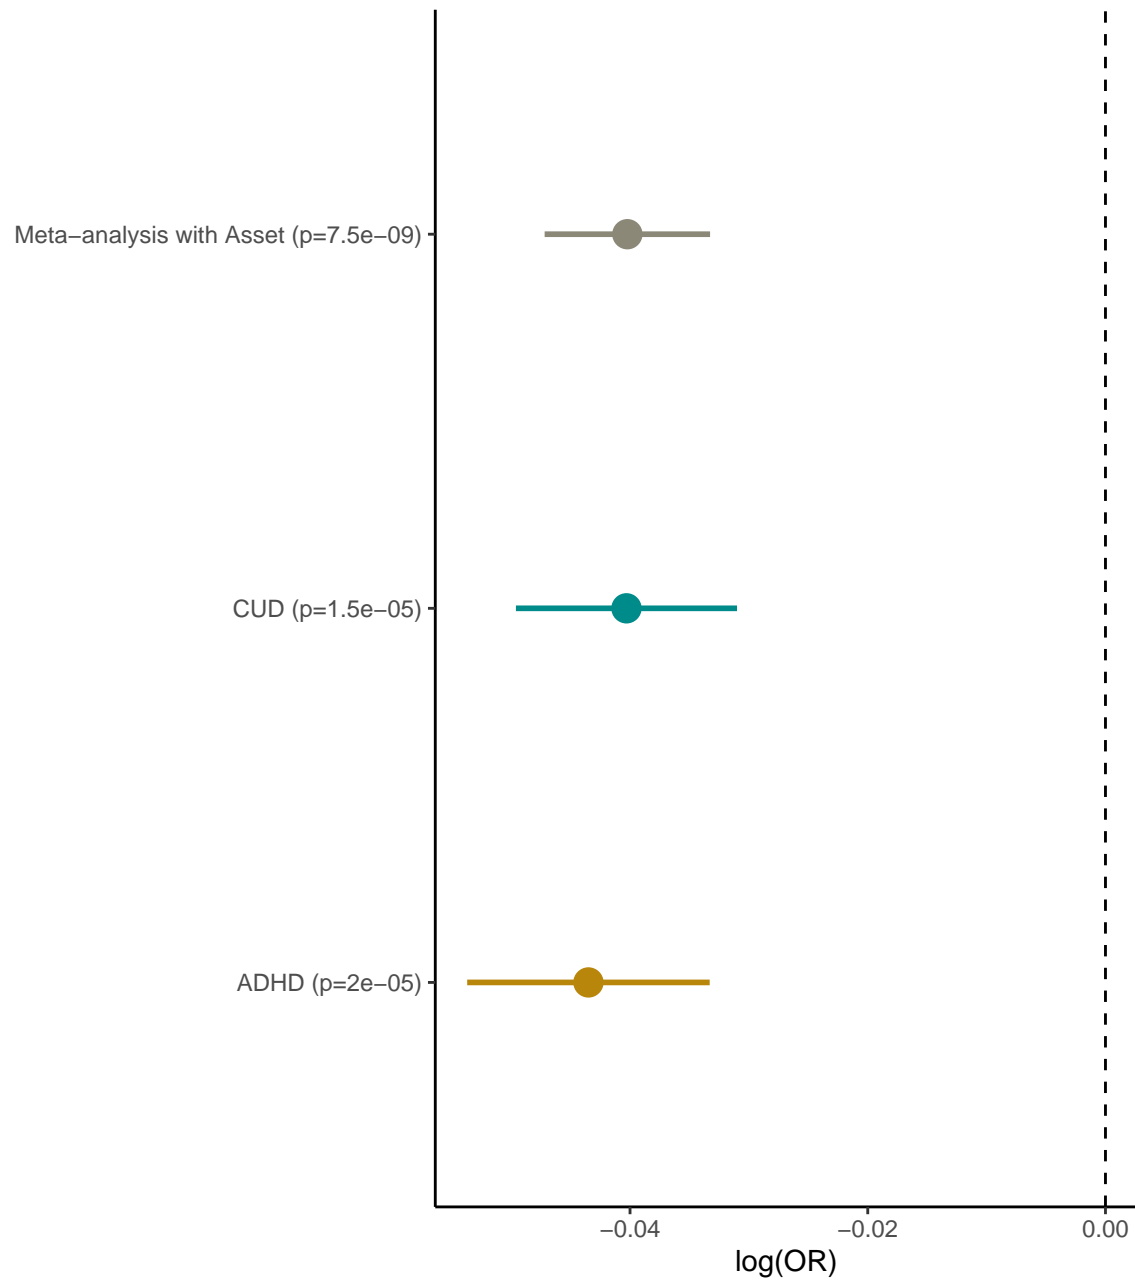

PM-Plot

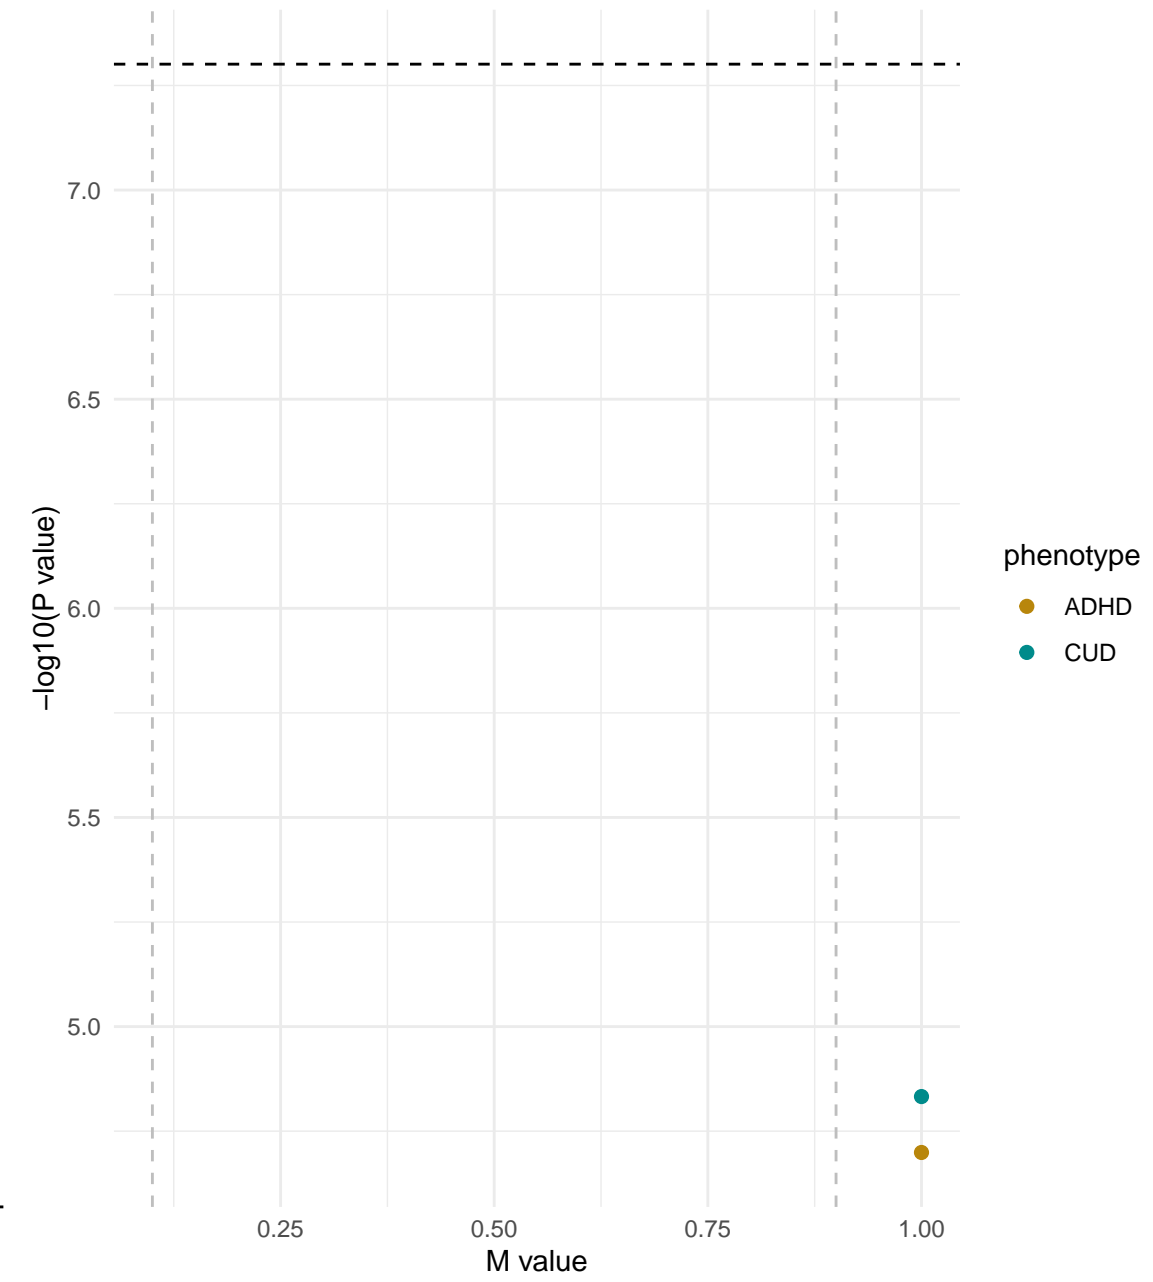

Lead SNP: rs1239071

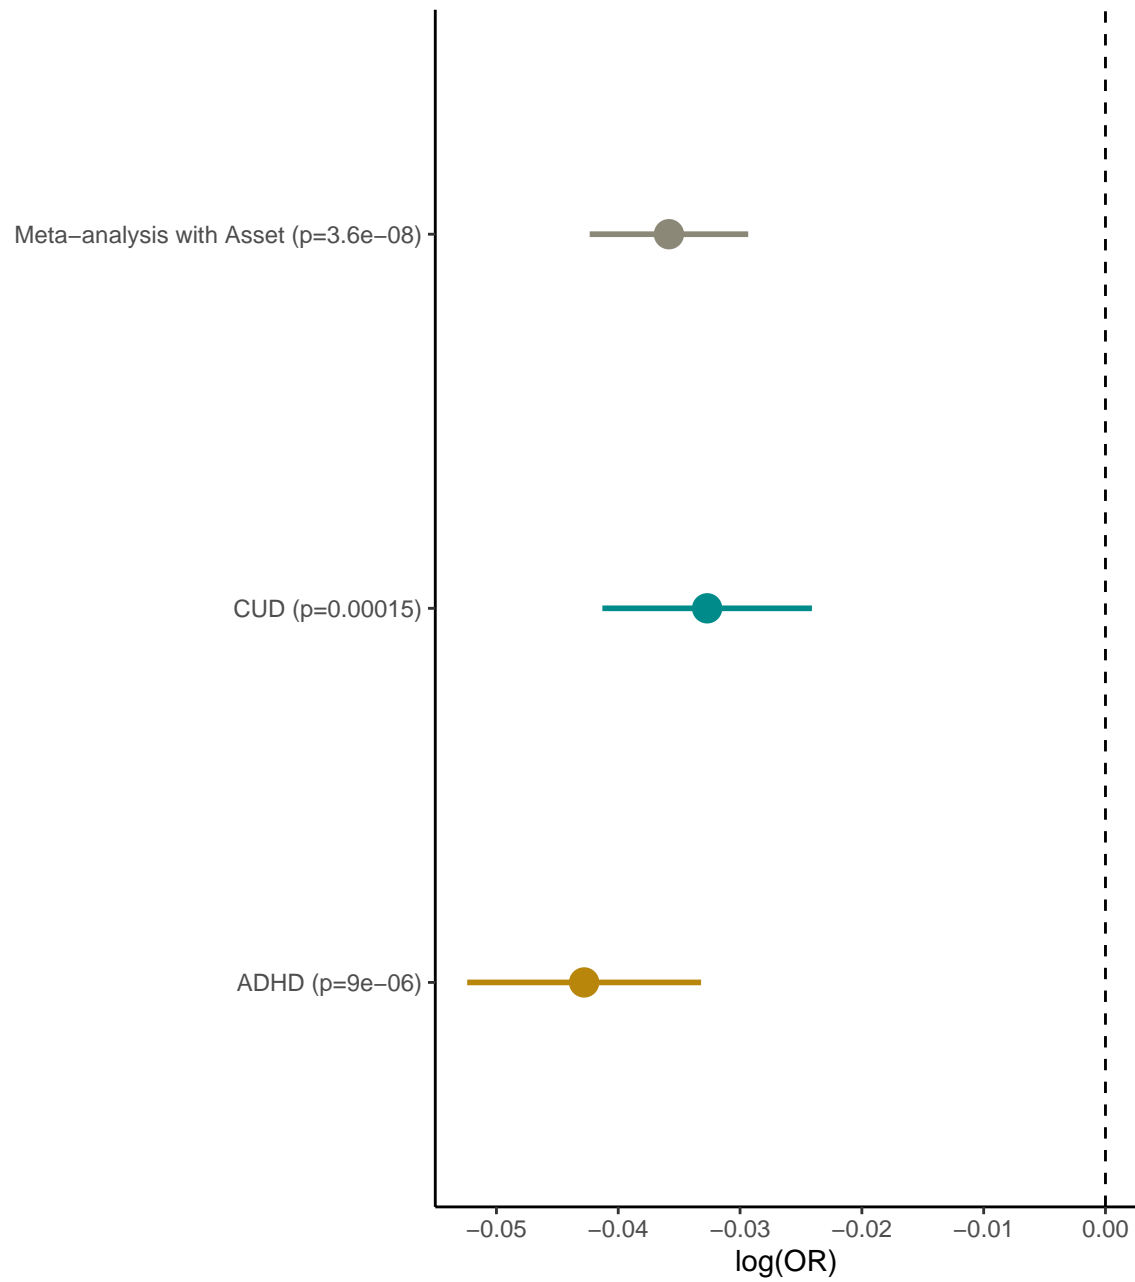

PM-Plot

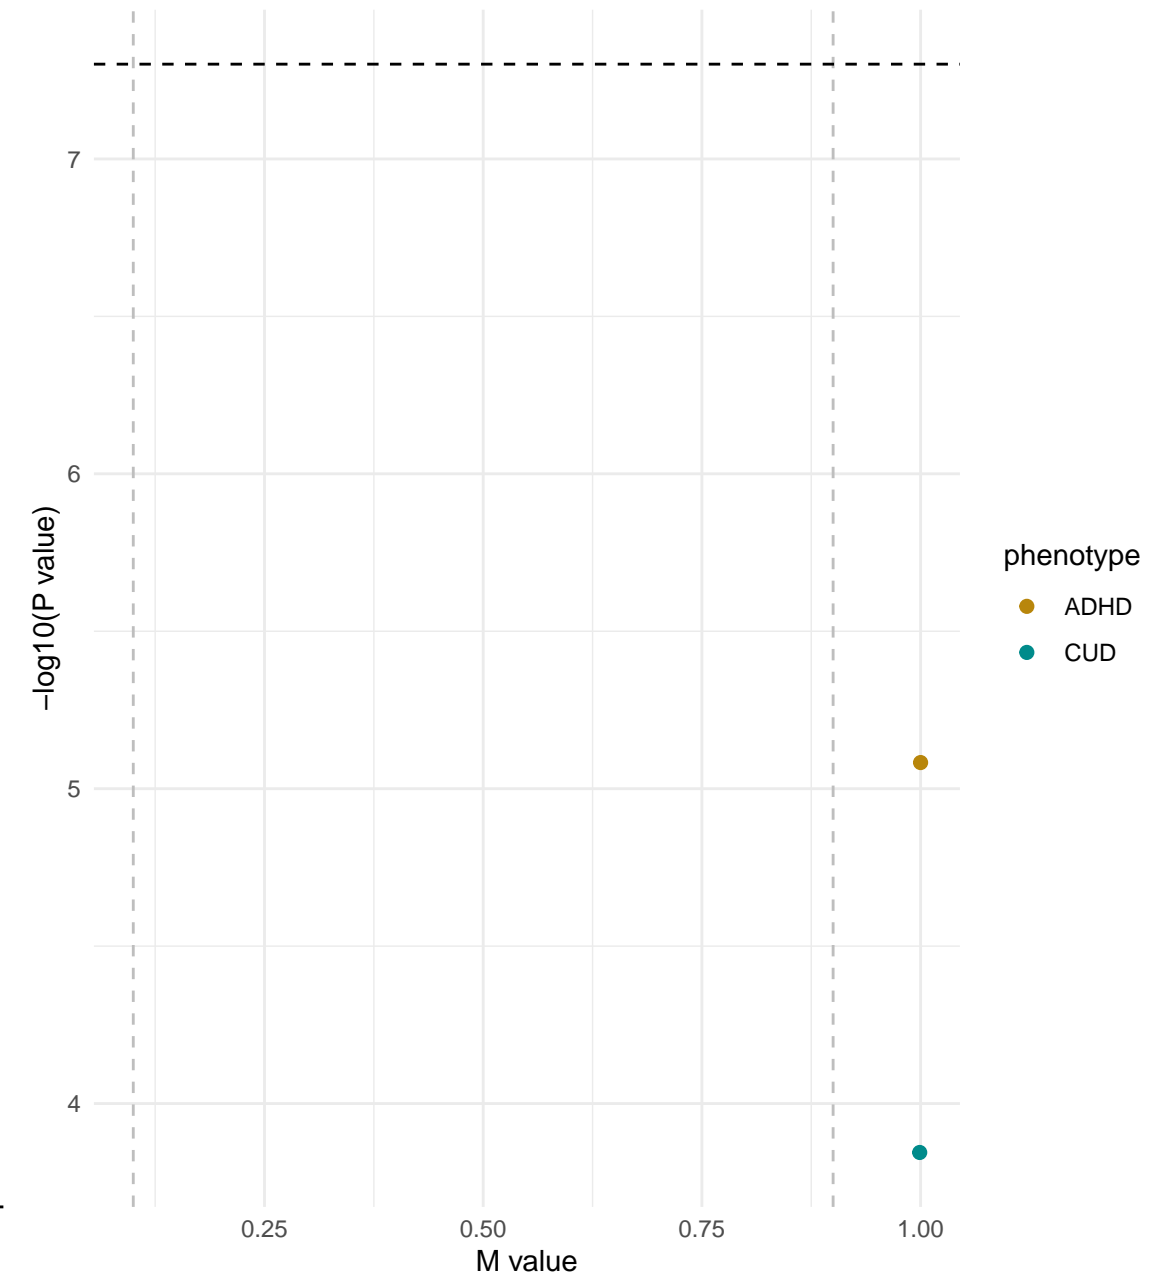

Lead SNP: rs1921086

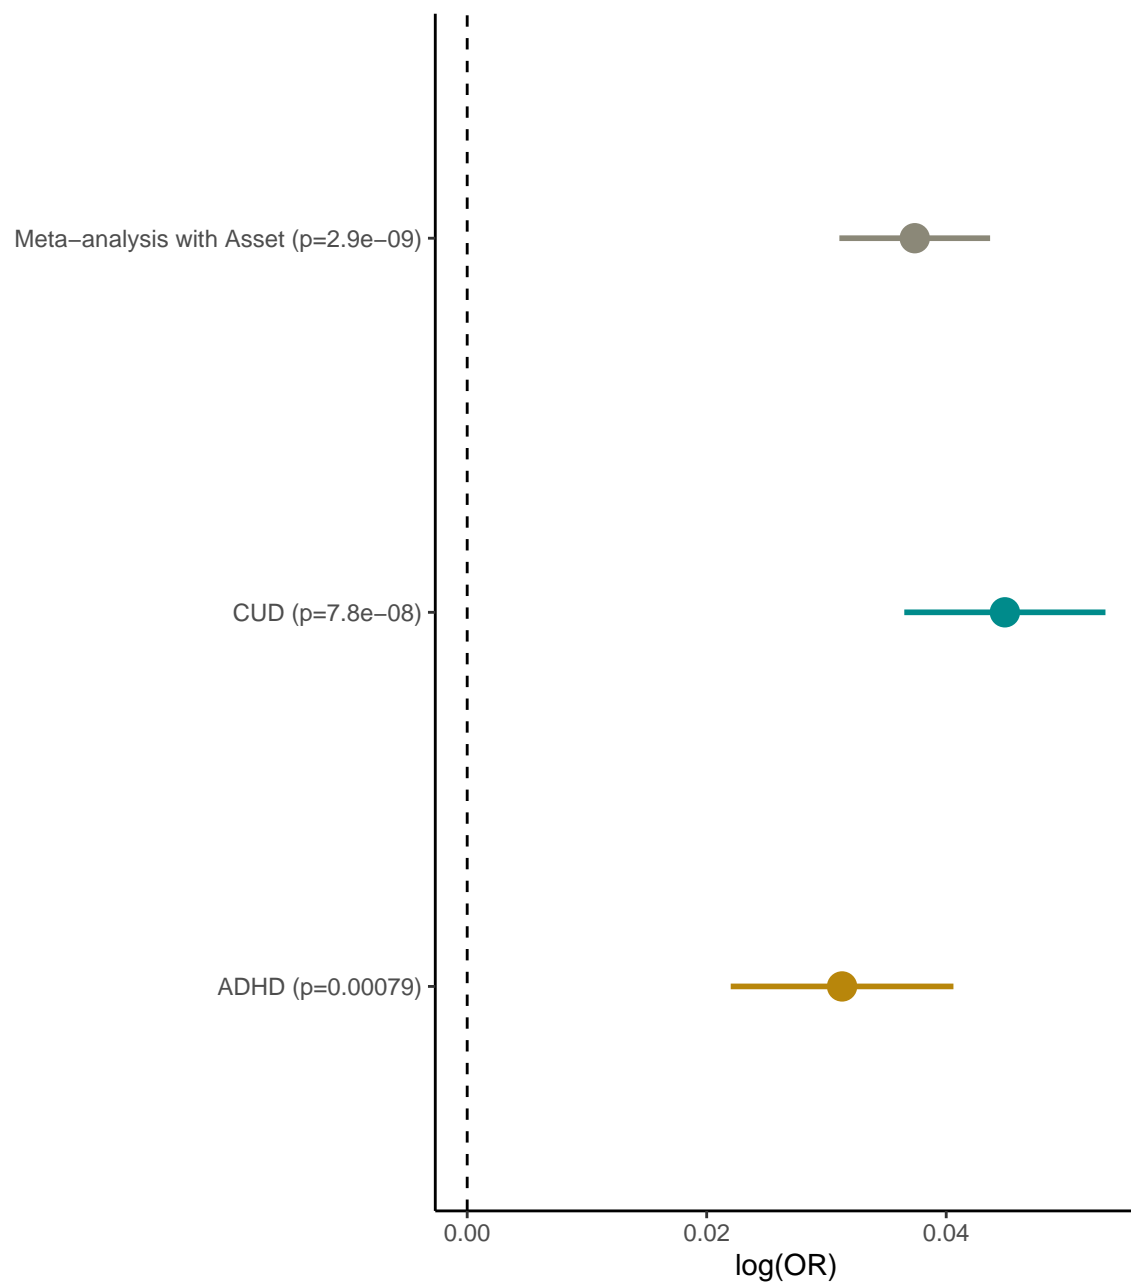

PM-Plot

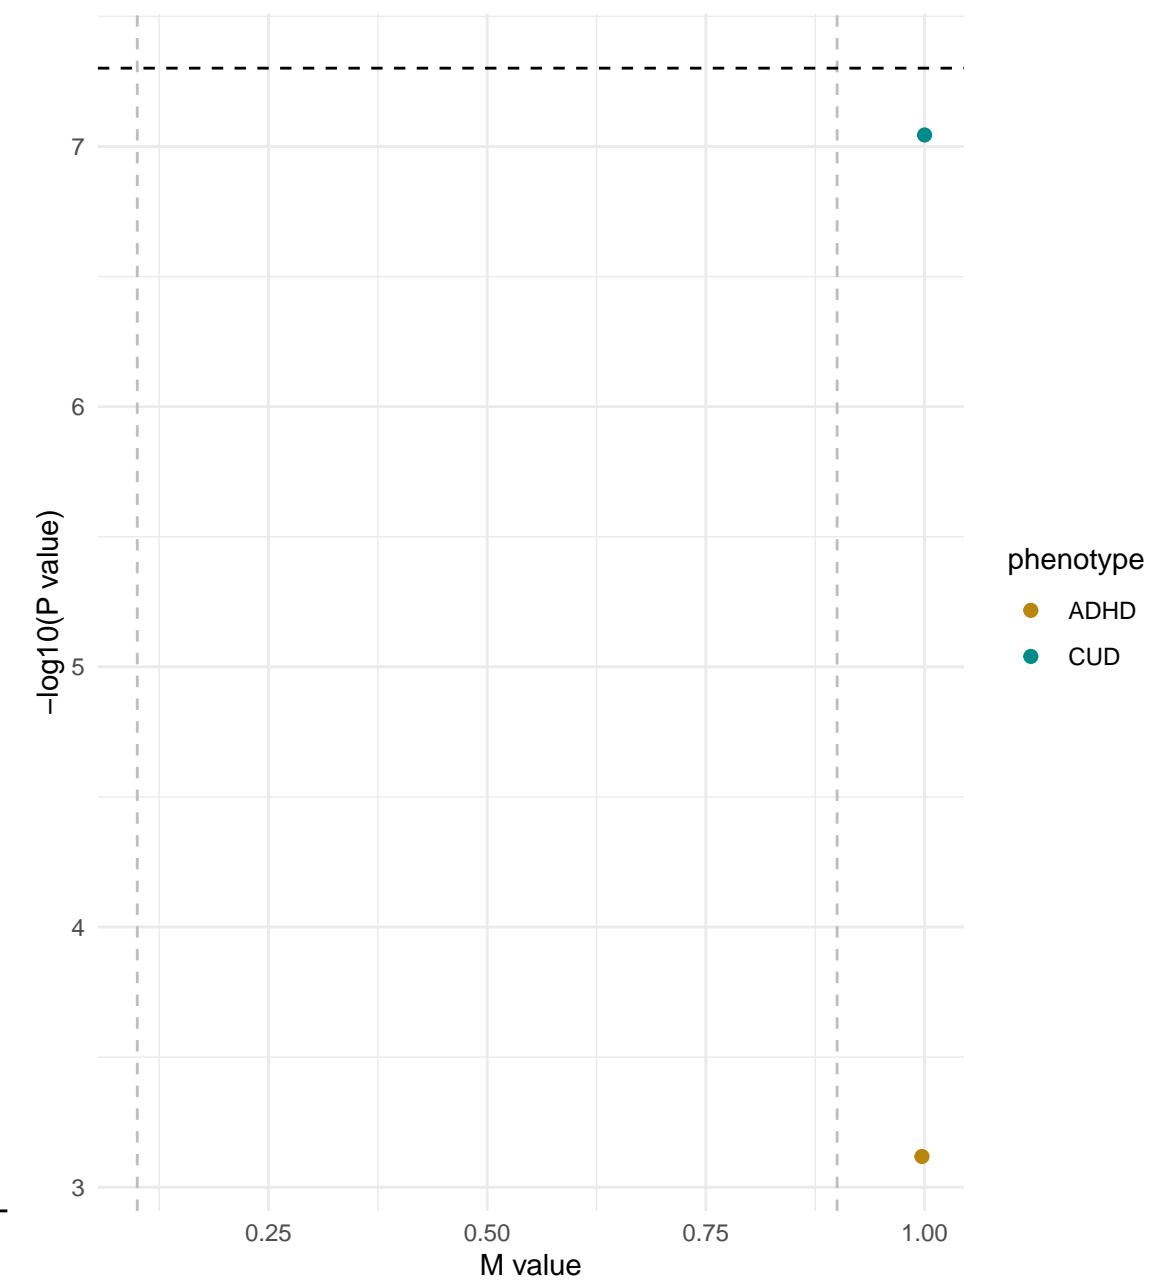

Lead SNP: rs1923240

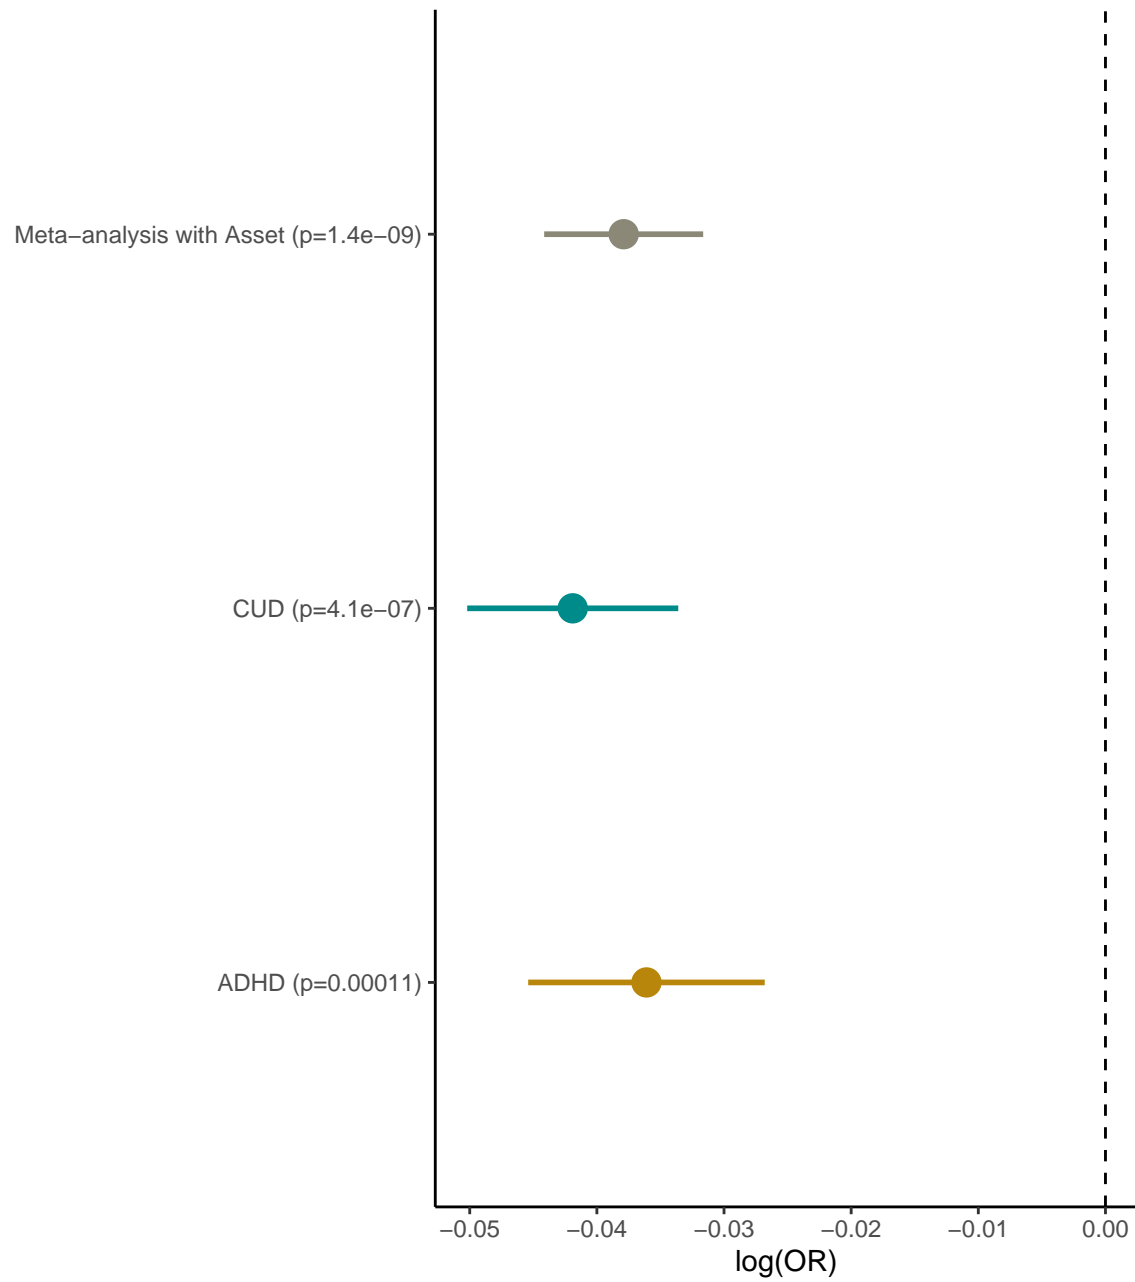

PM-Plot

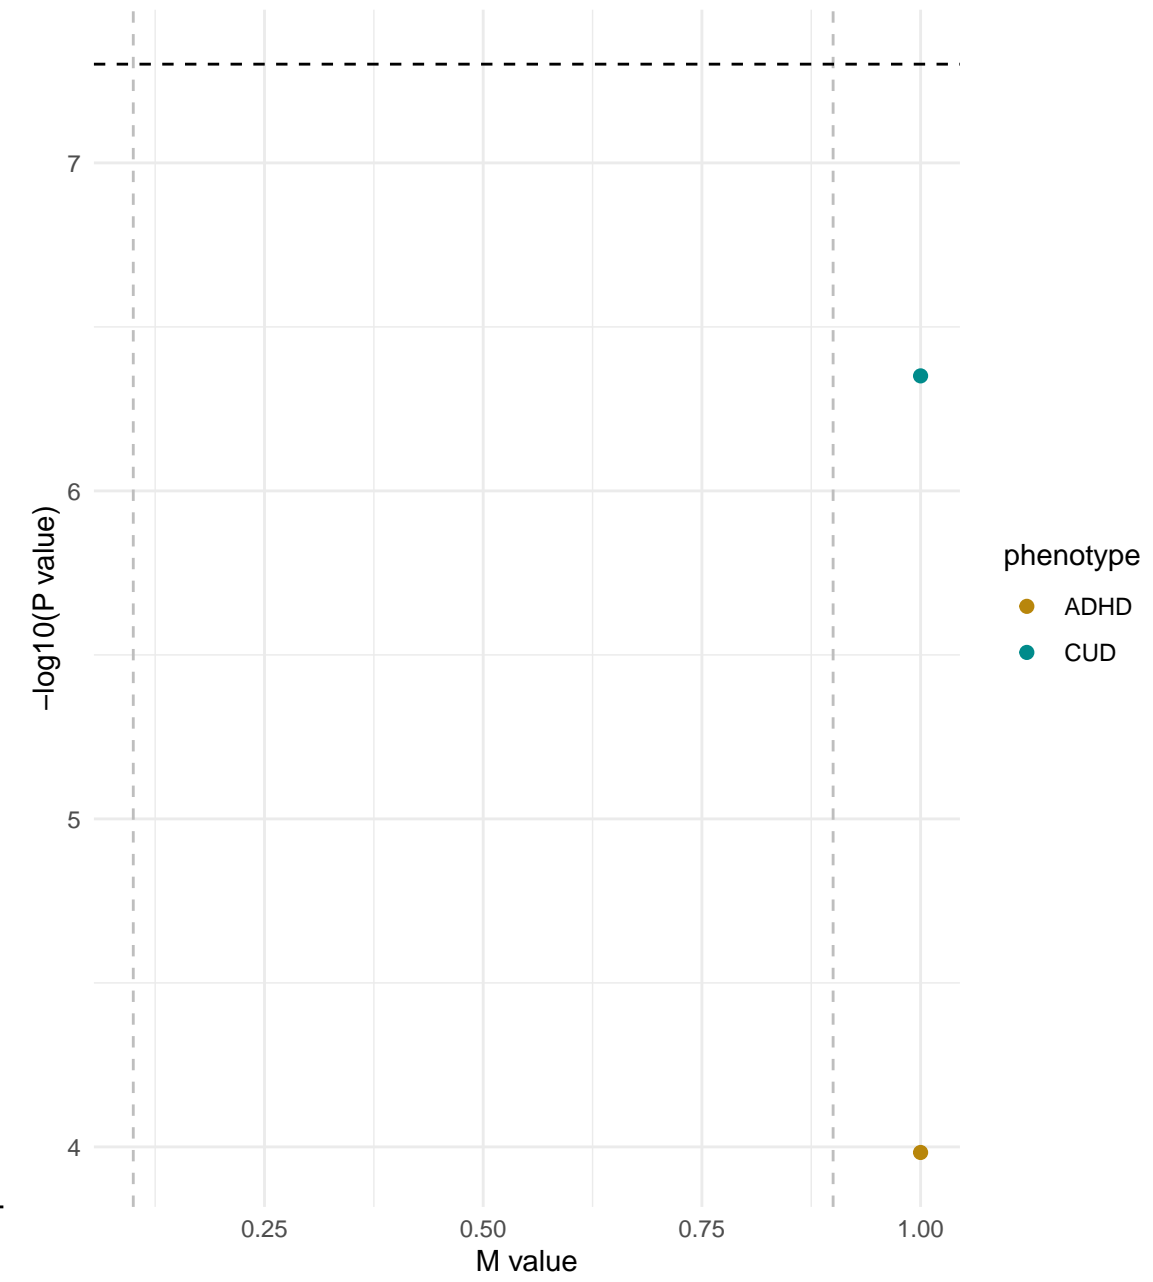

Lead SNP: rs1989903

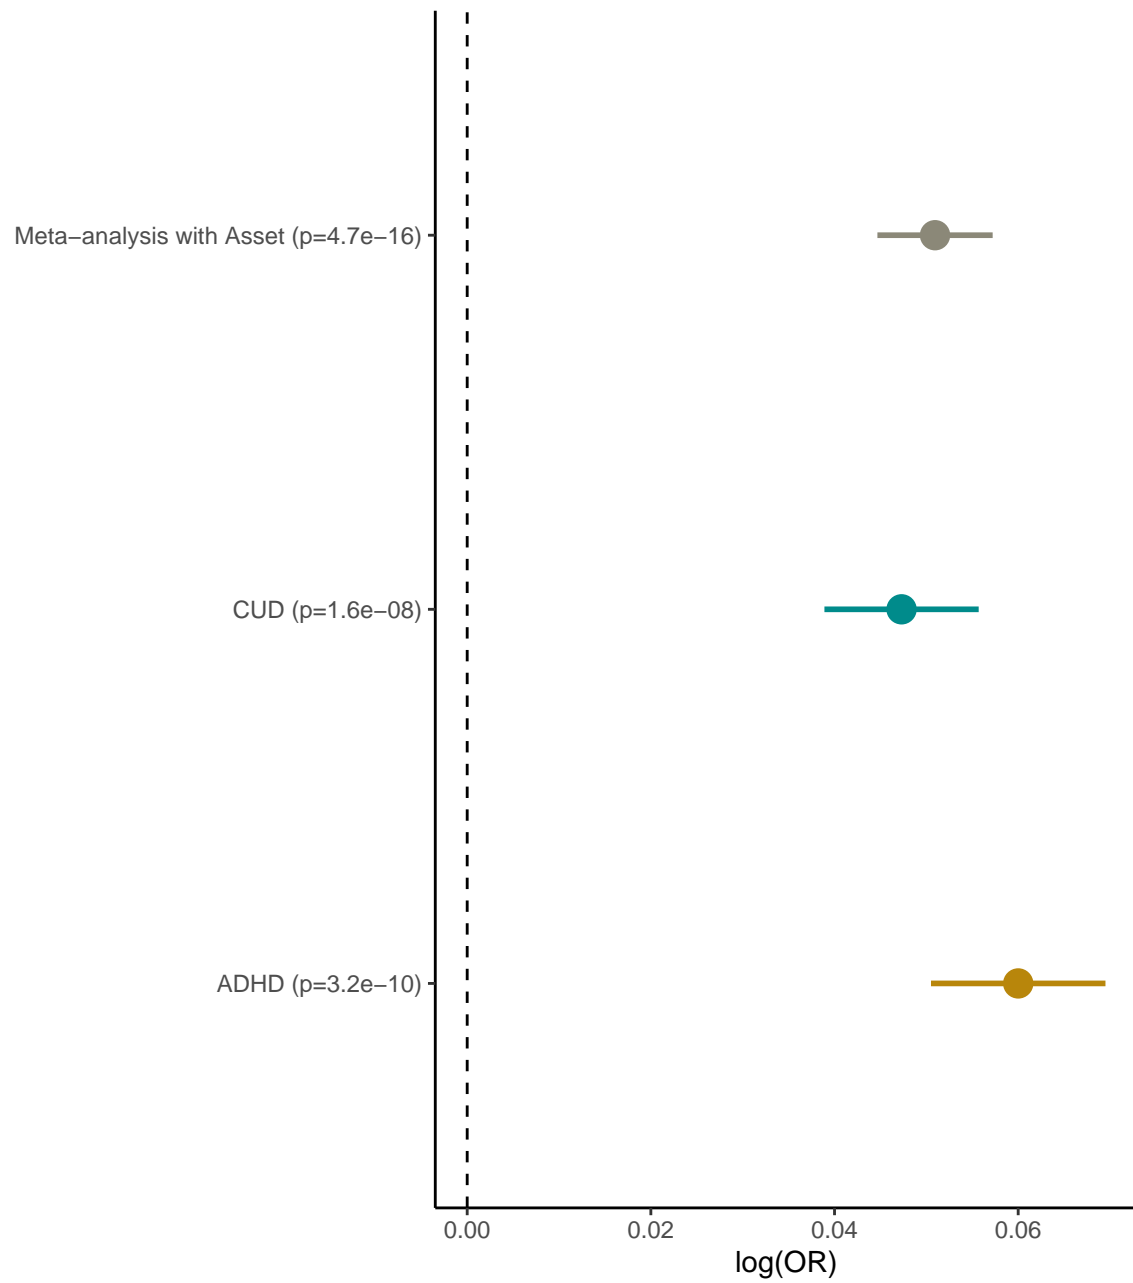

PM-Plot

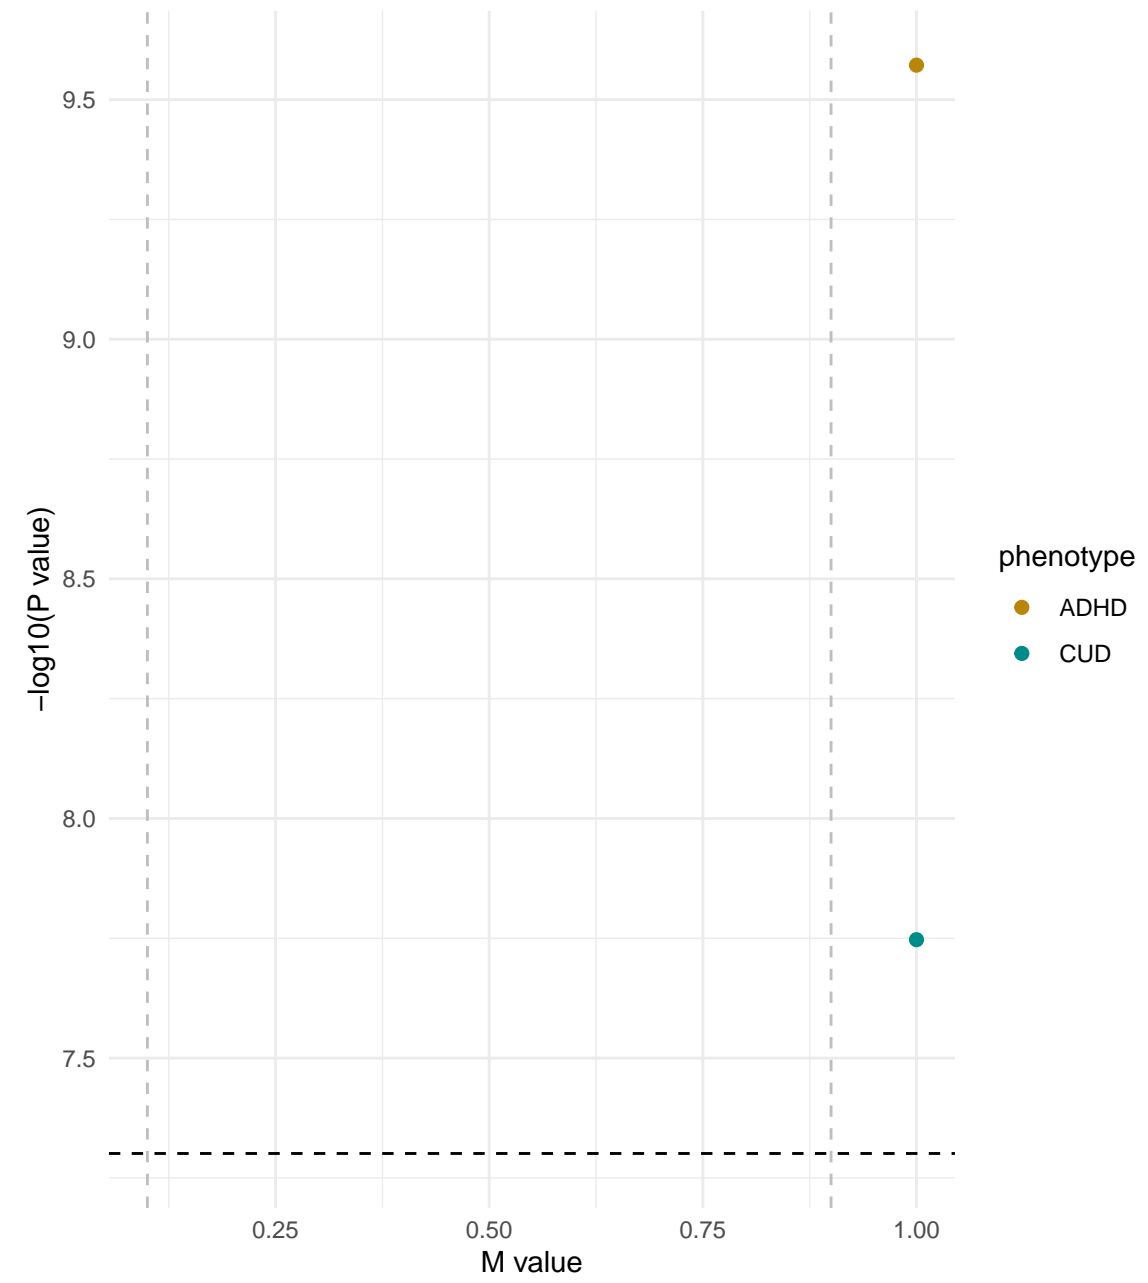



Lead SNP: rs2014920

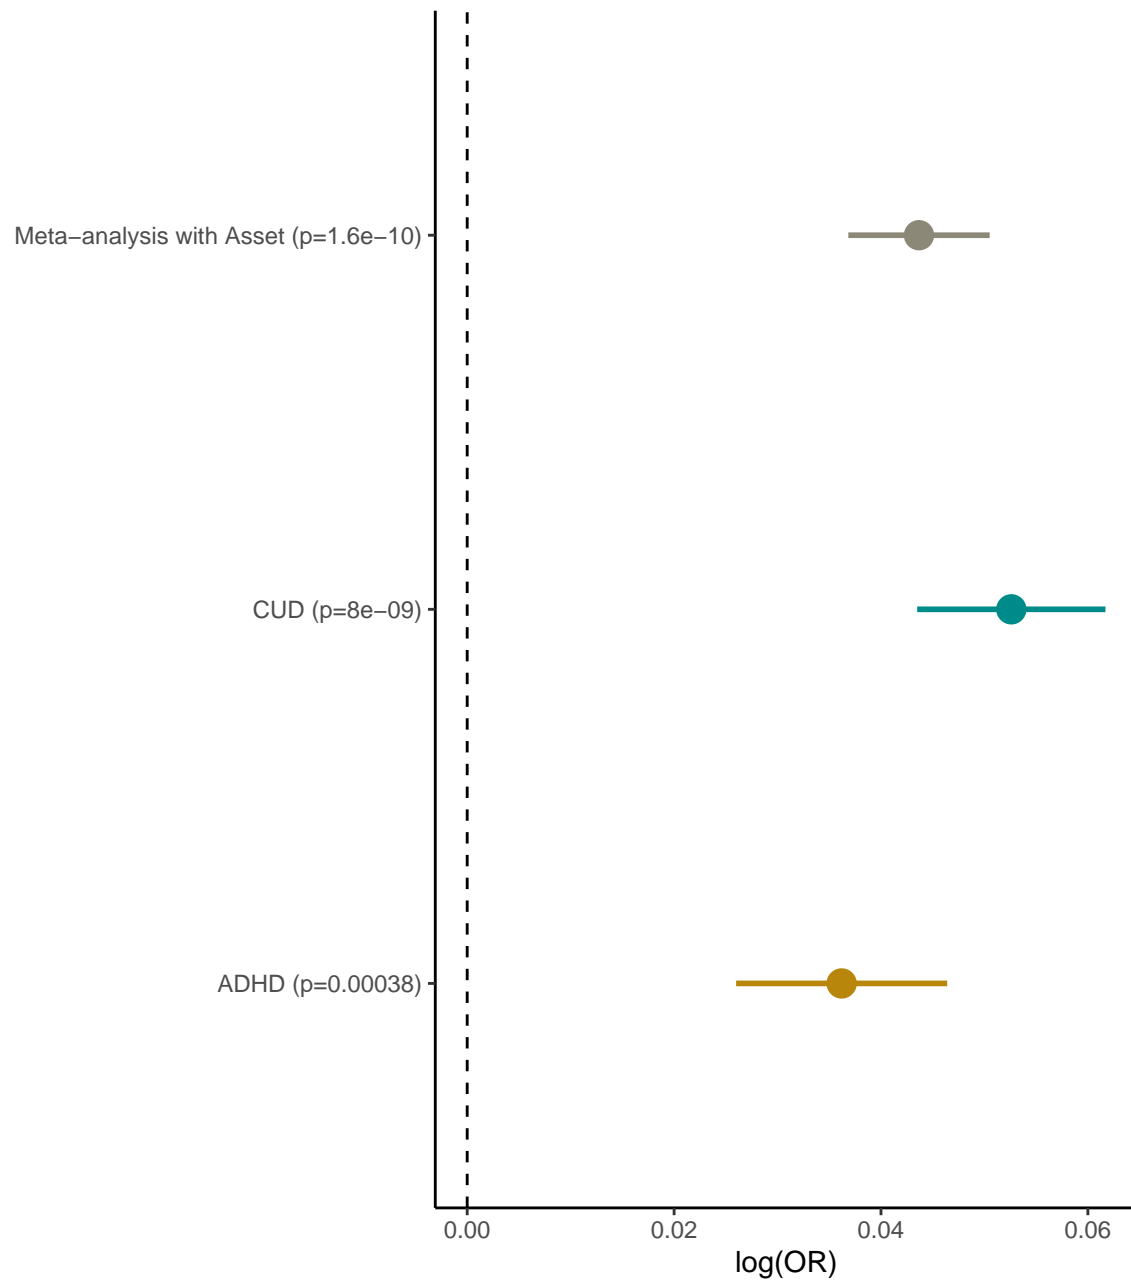

PM-Plot

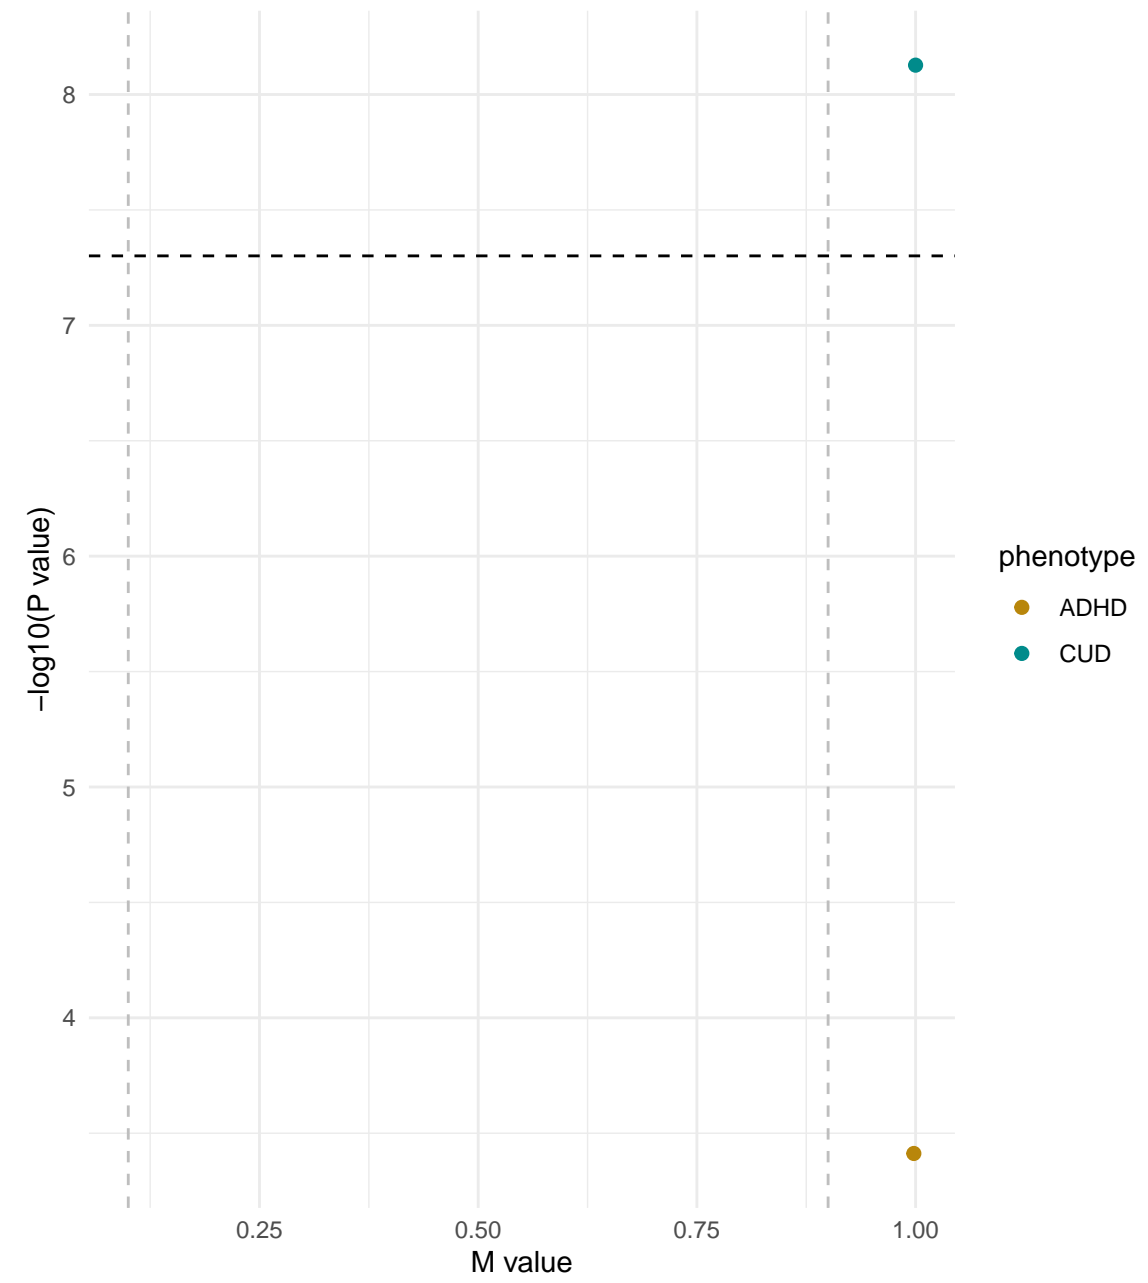

Lead SNP: rs2155290

PM-Plot

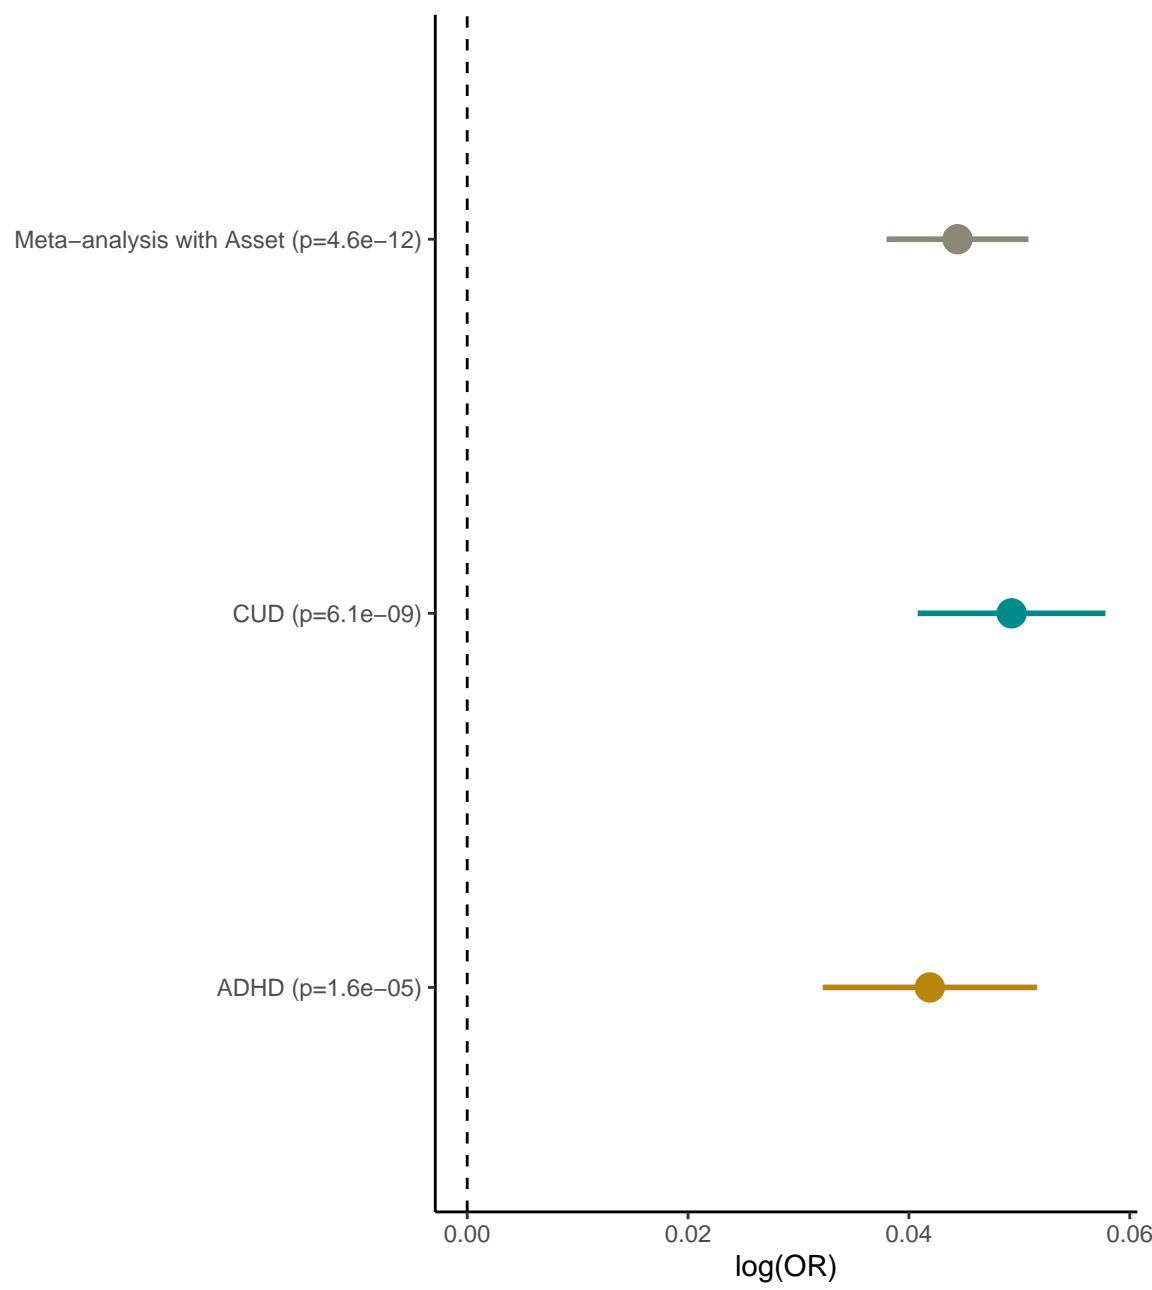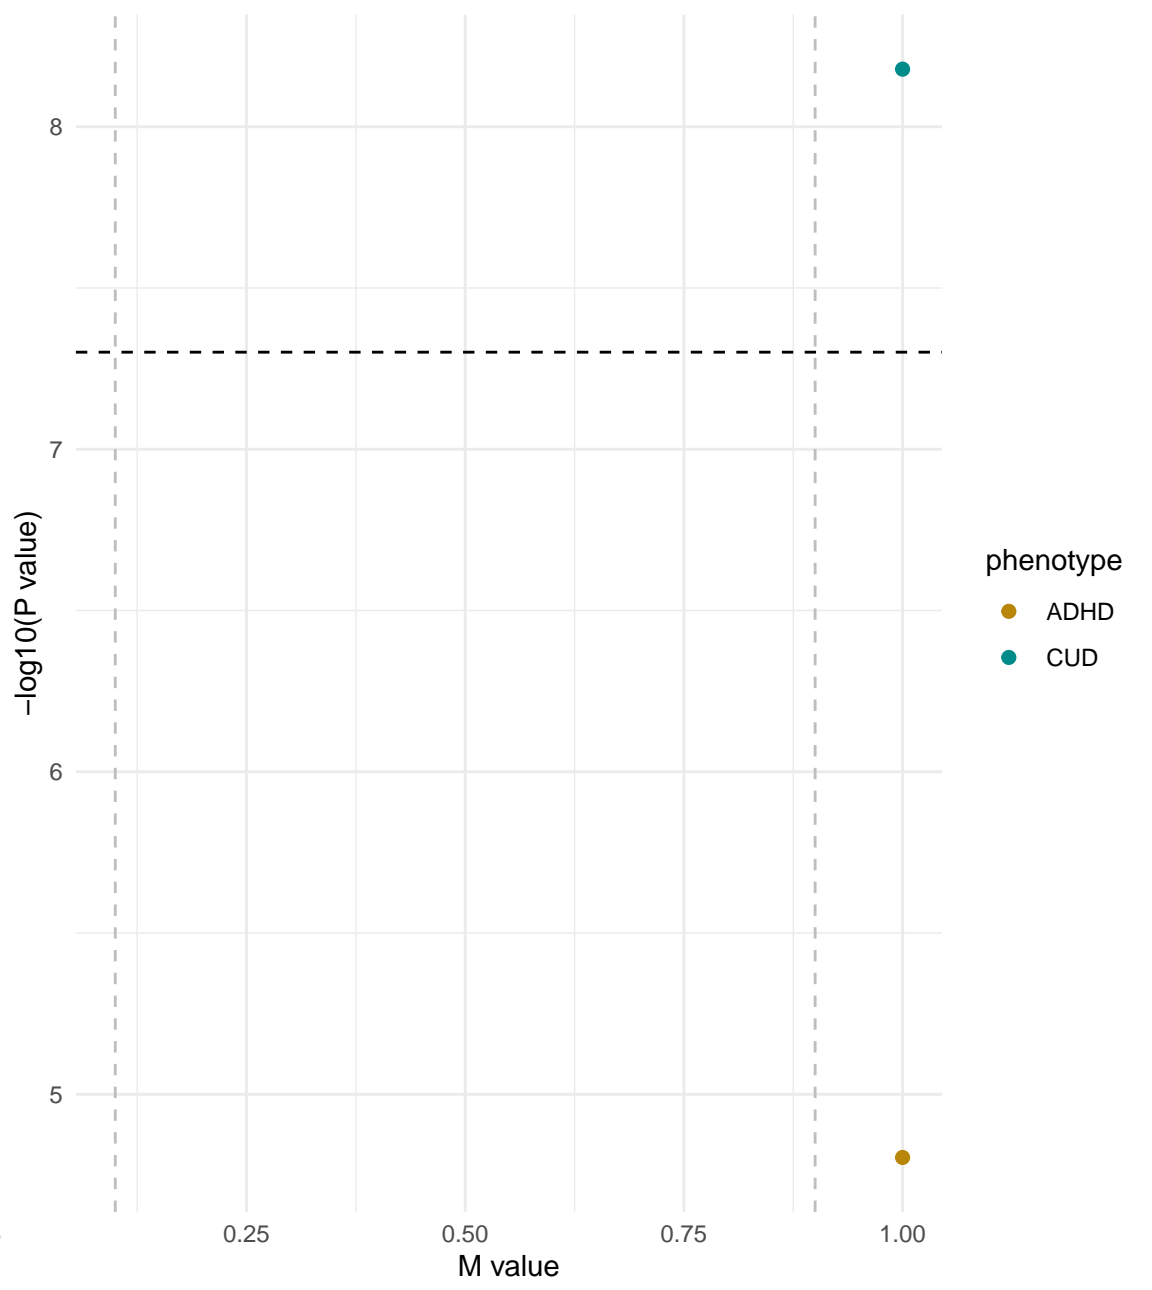

Lead SNP: rs2236940

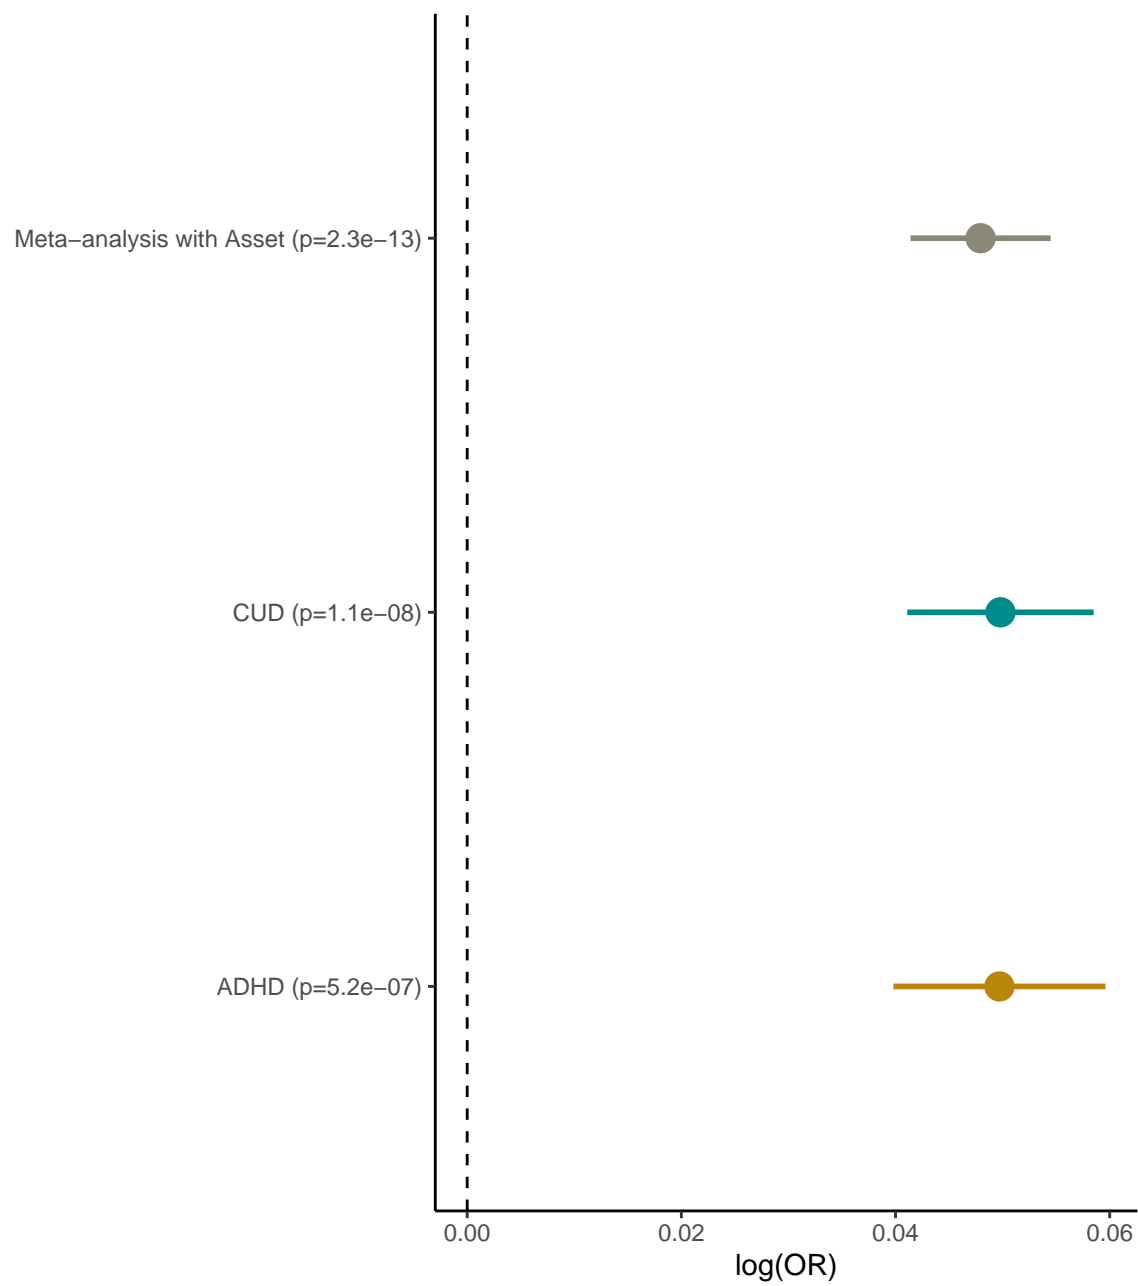

PM-Plot

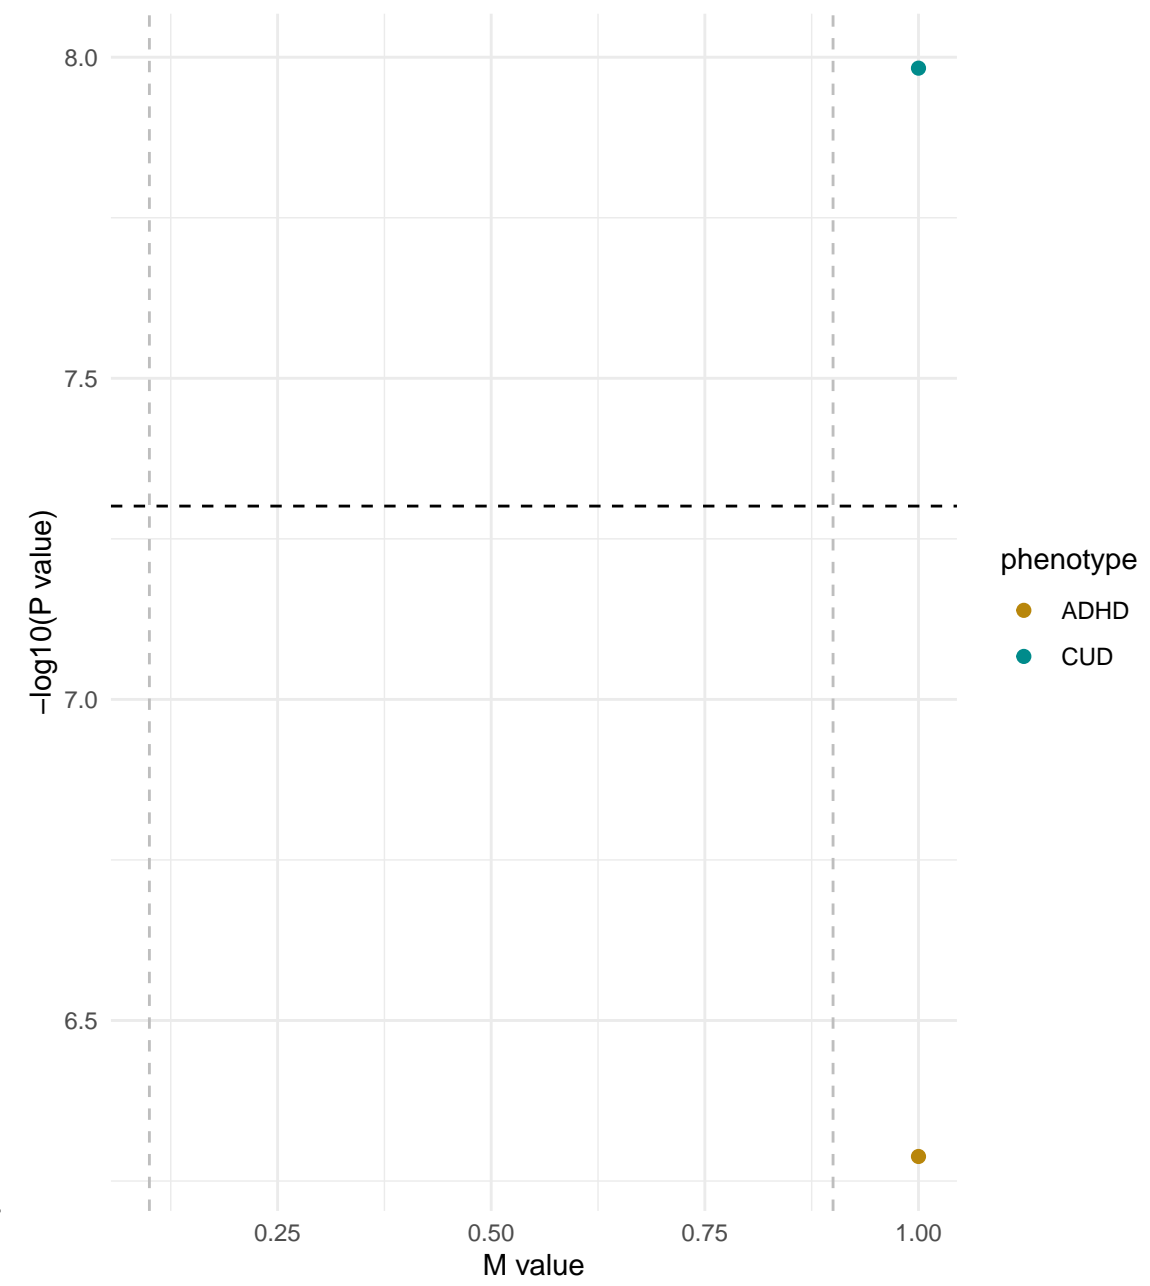

Lead SNP: rs2299308

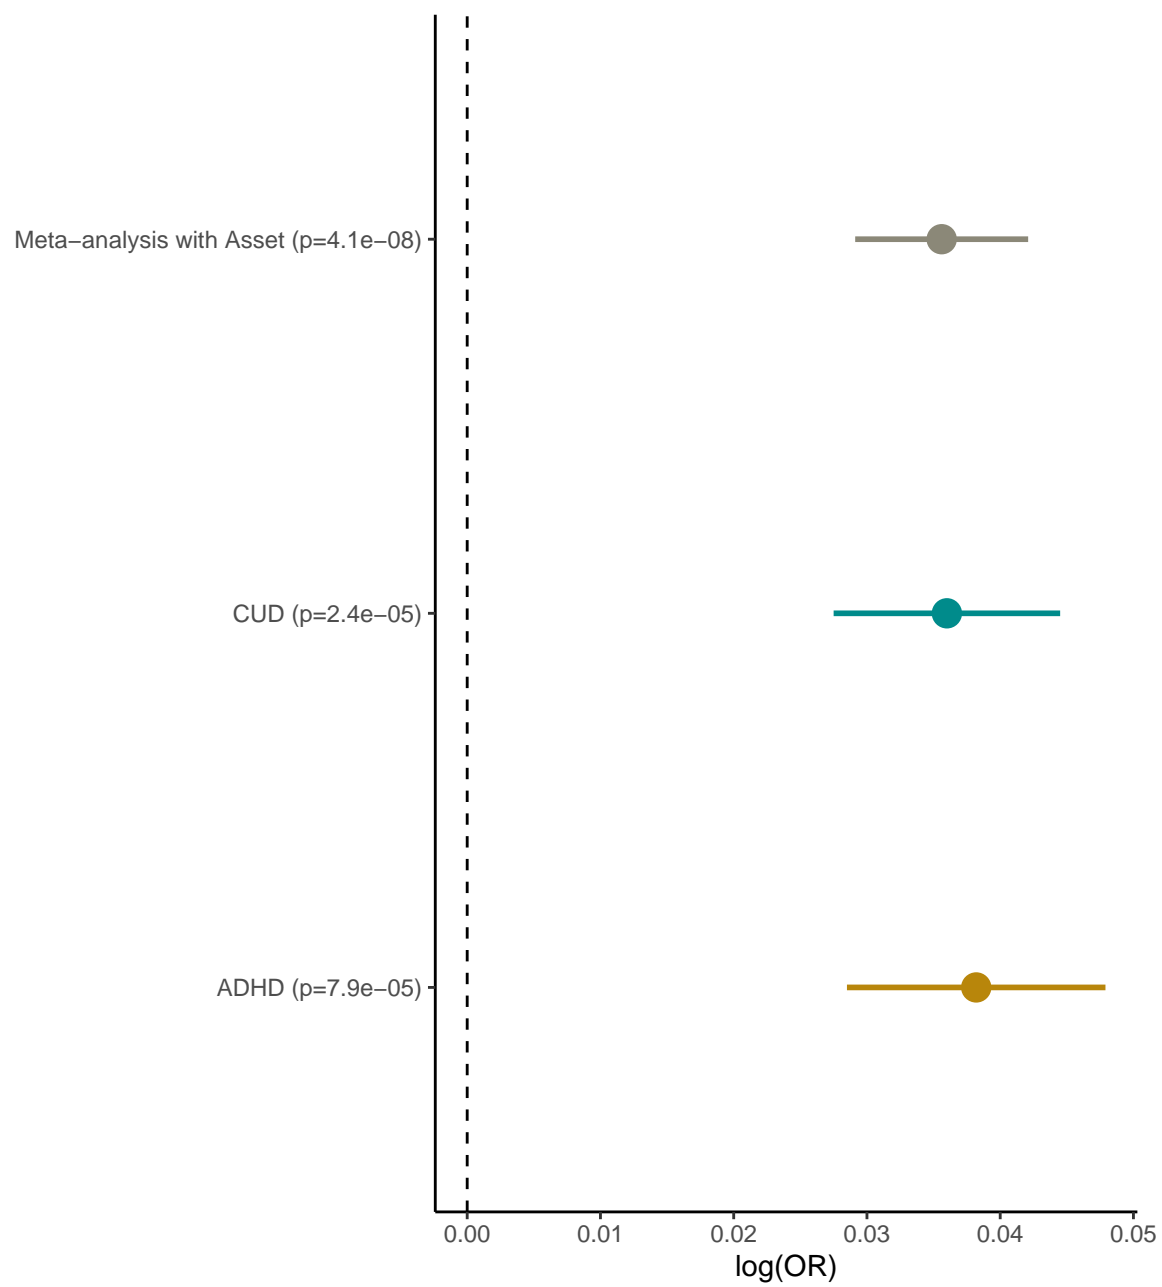

PM-Plot

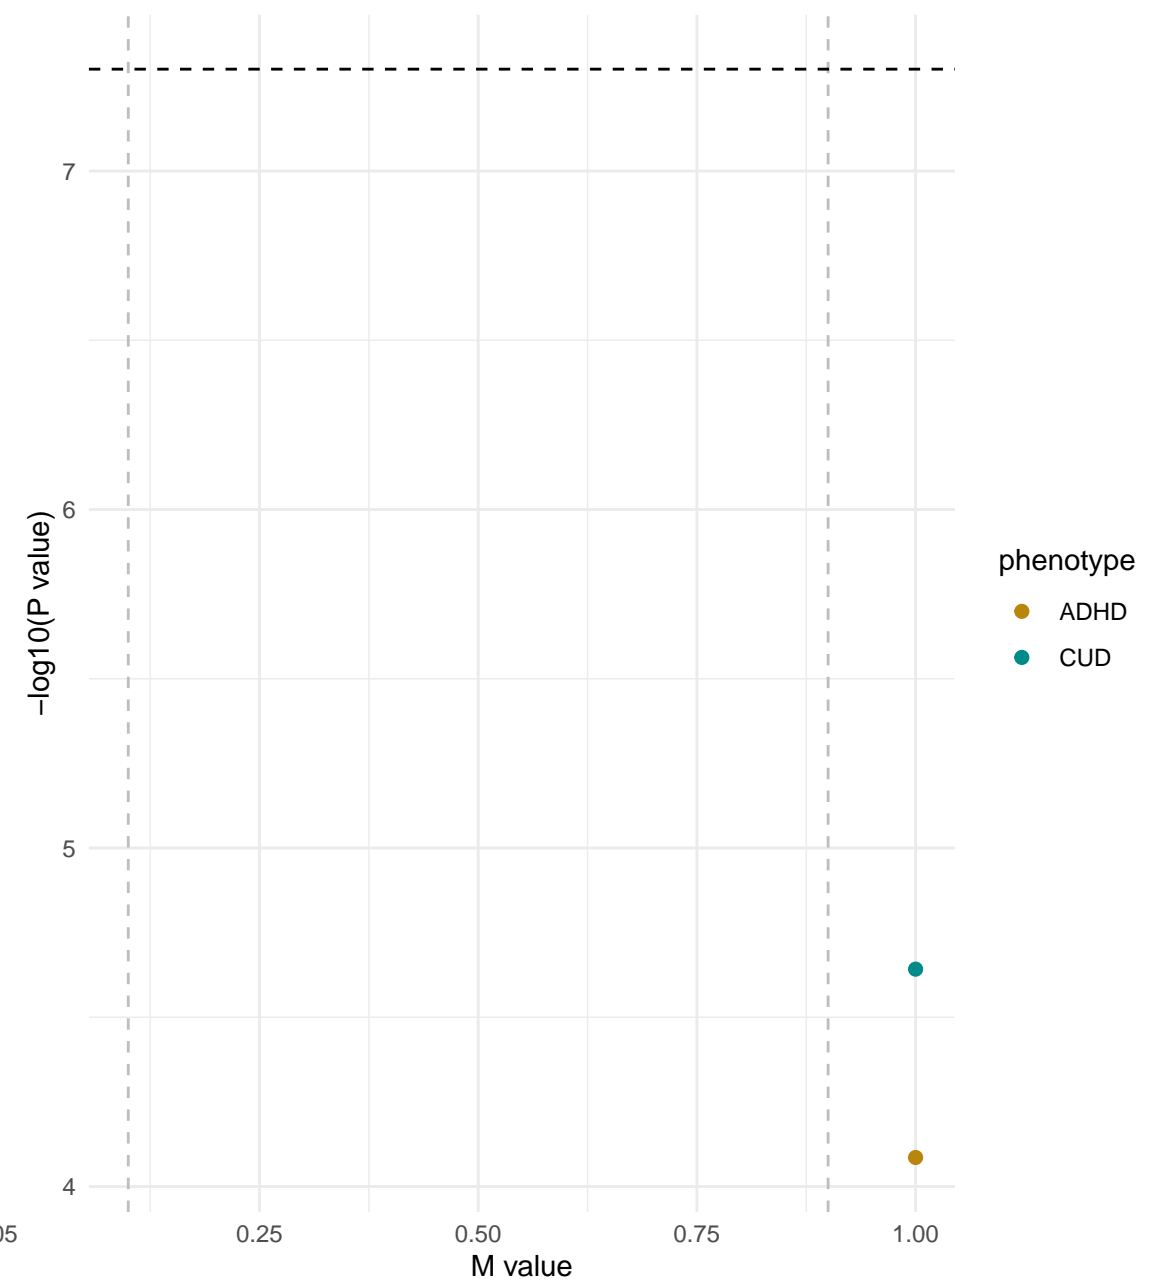

Lead SNP: rs2310819

PM-Plot

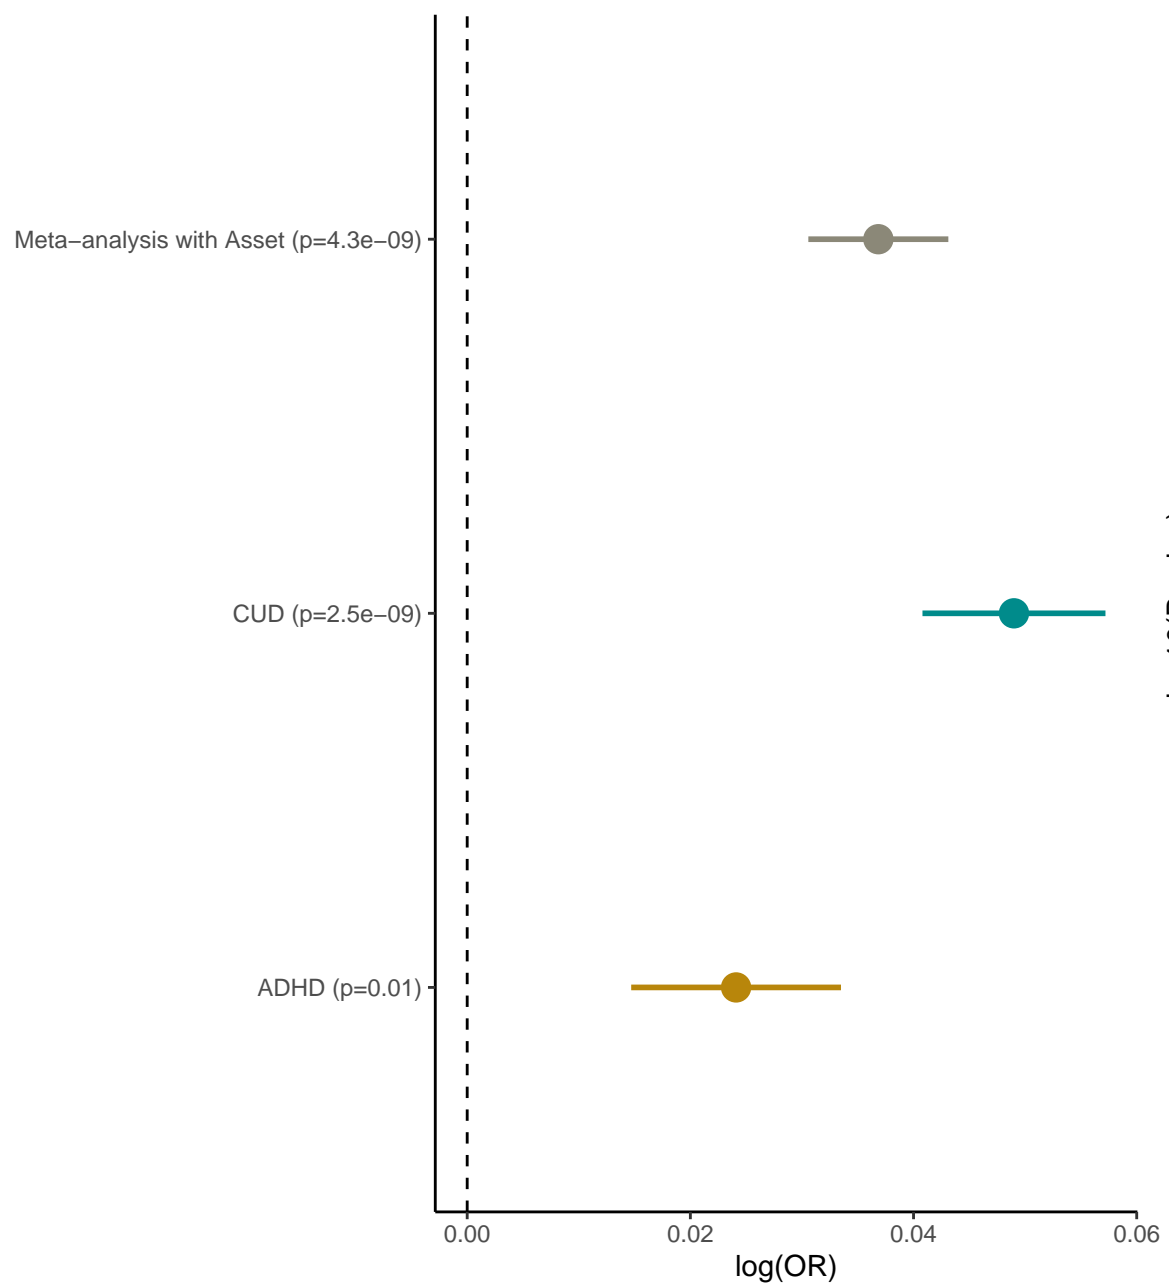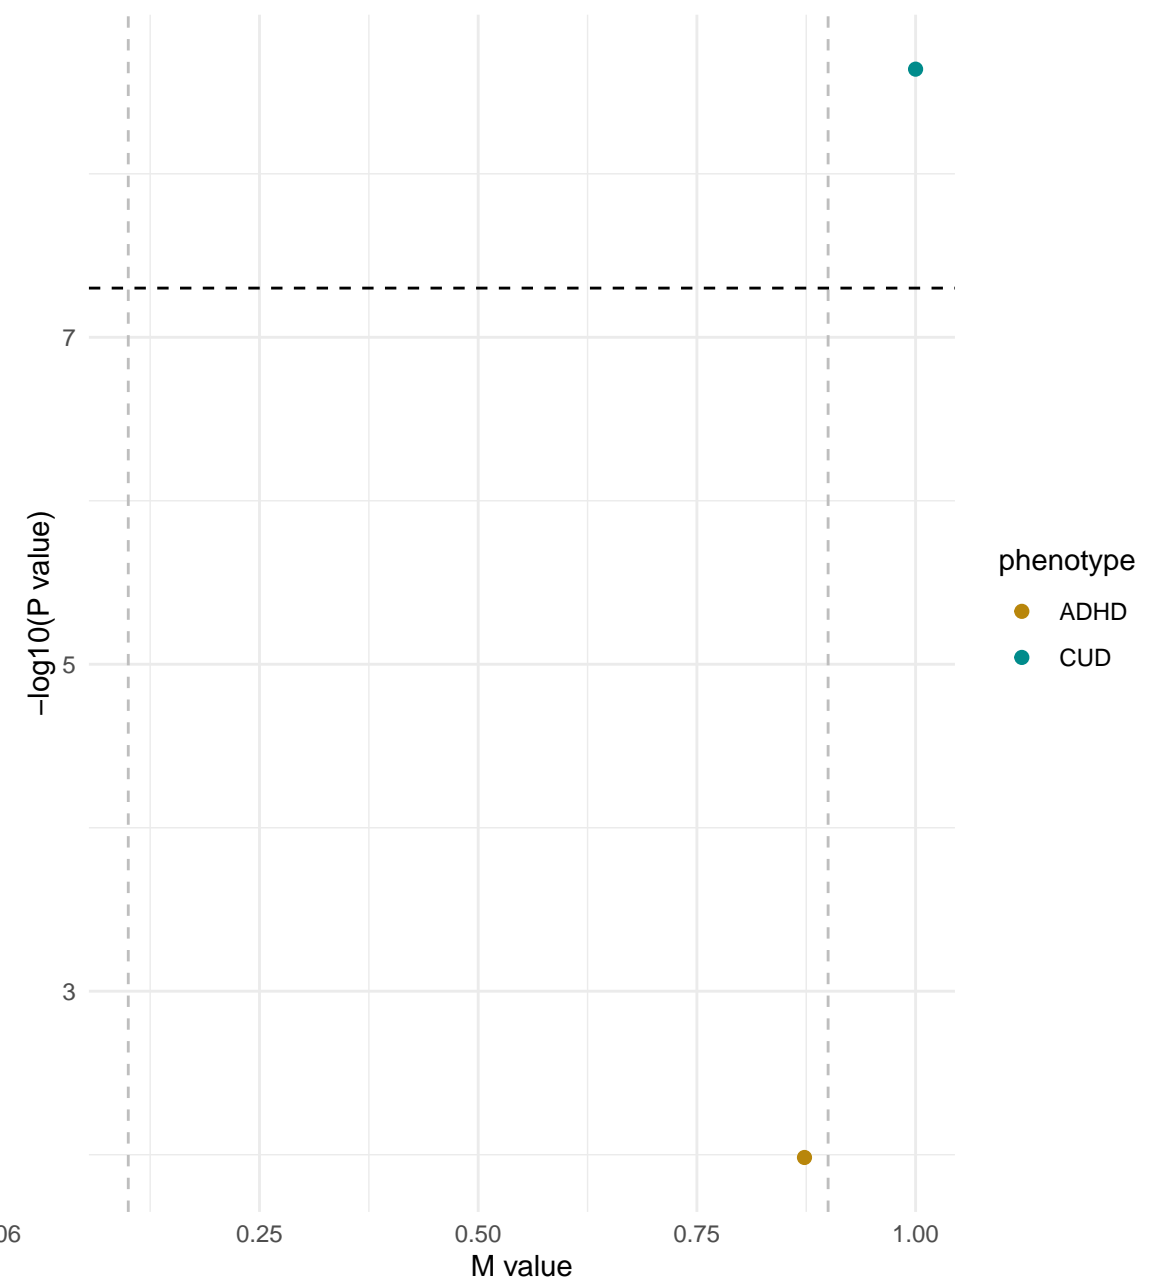

Lead SNP: rs2627197

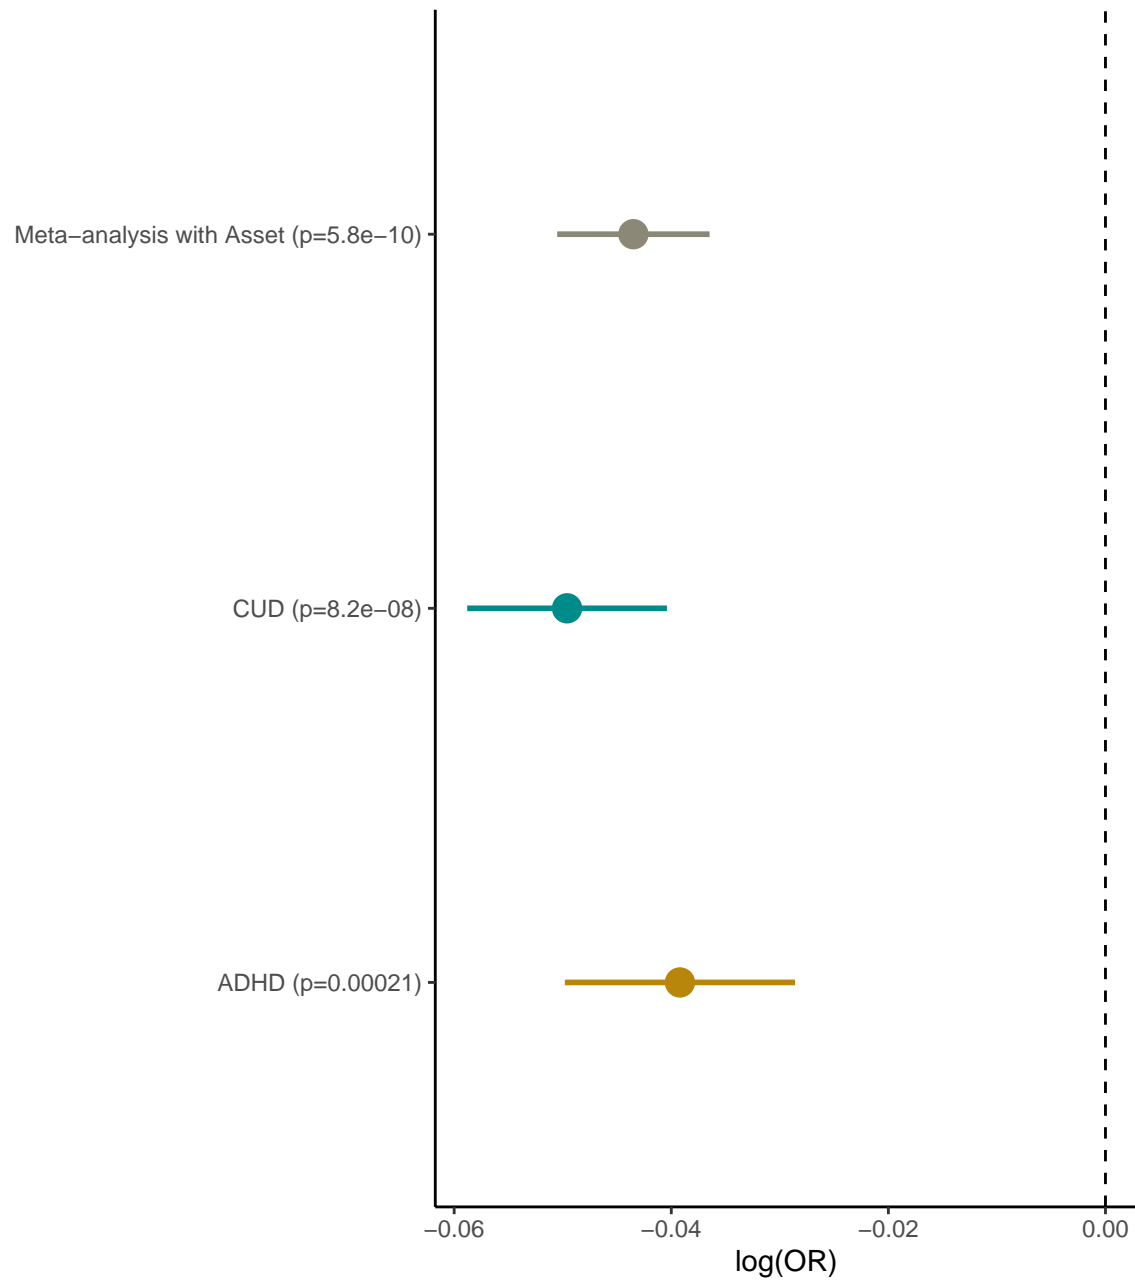

PM-Plot

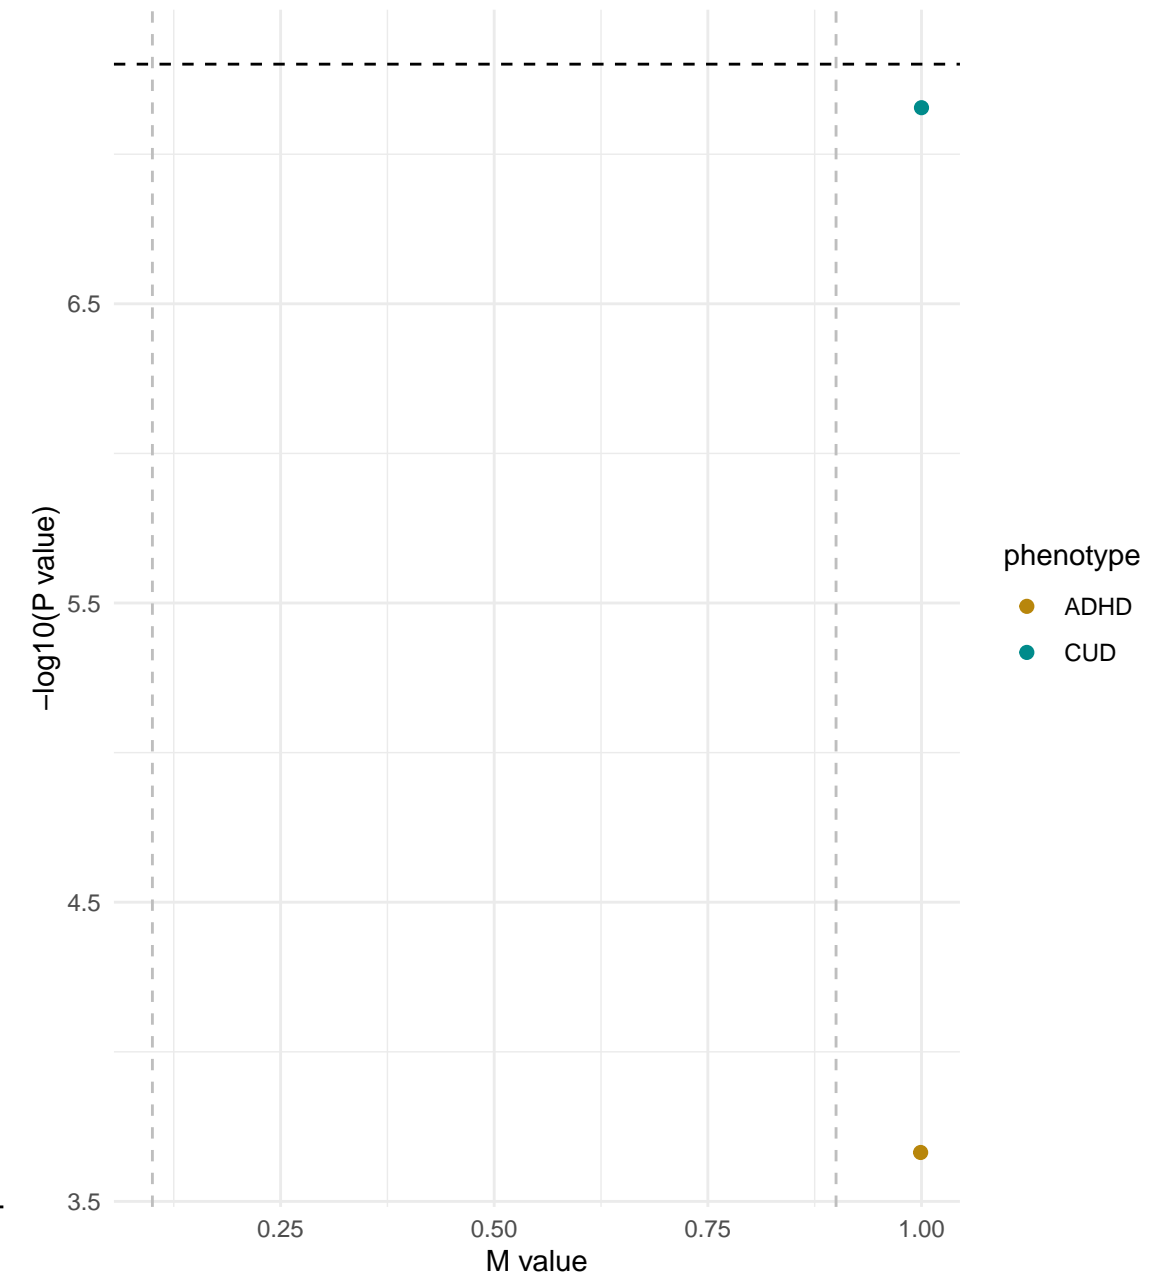

Lead SNP: rs2734832

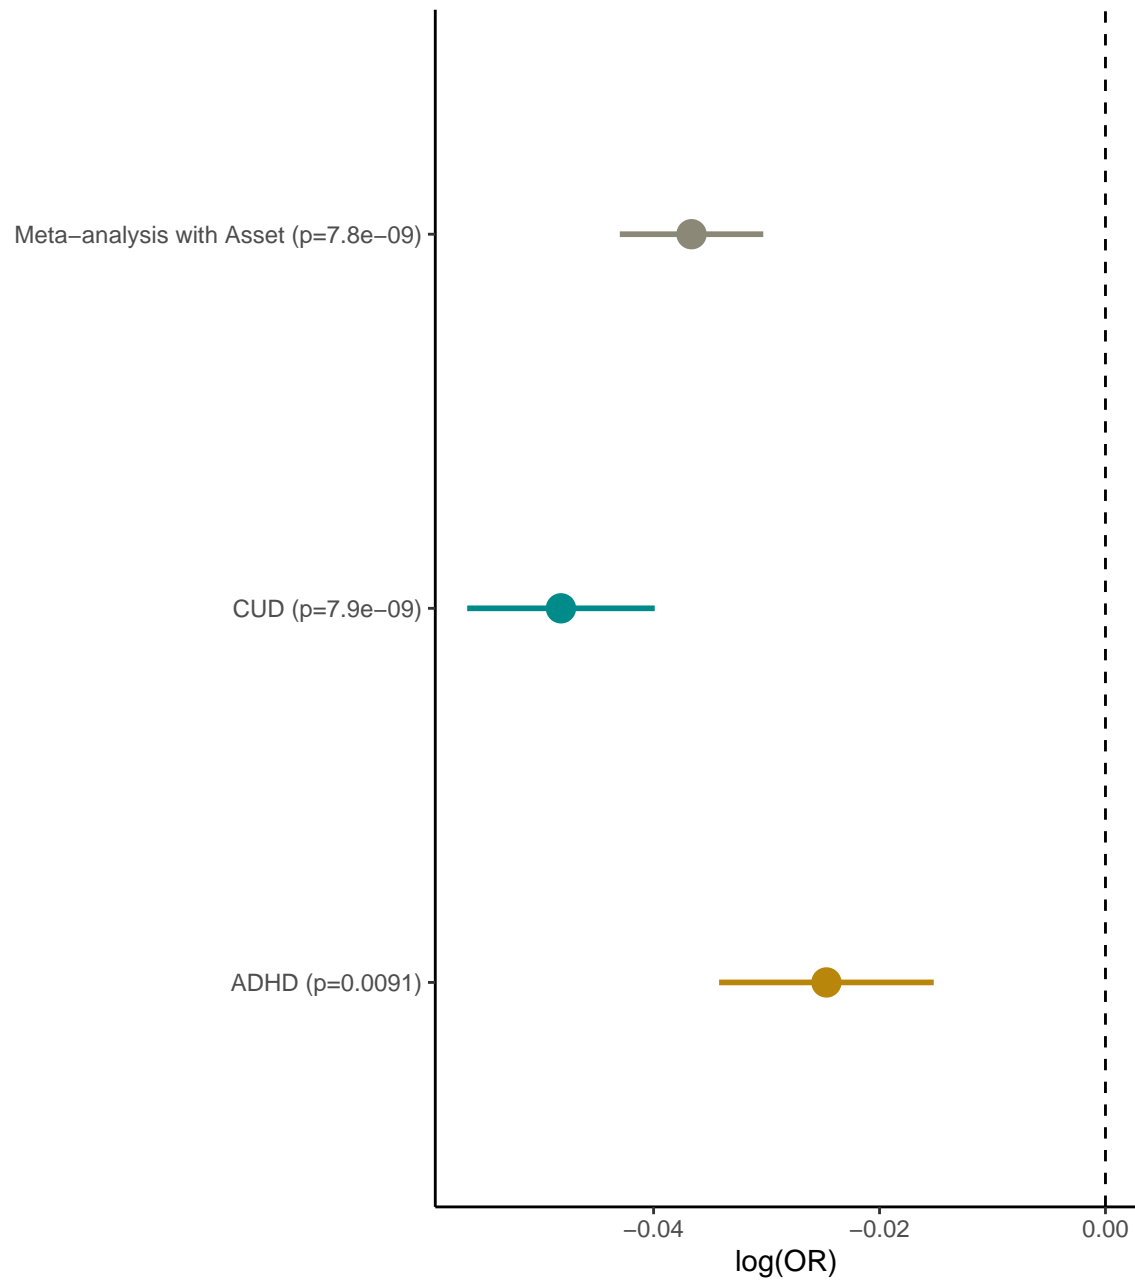

PM-Plot

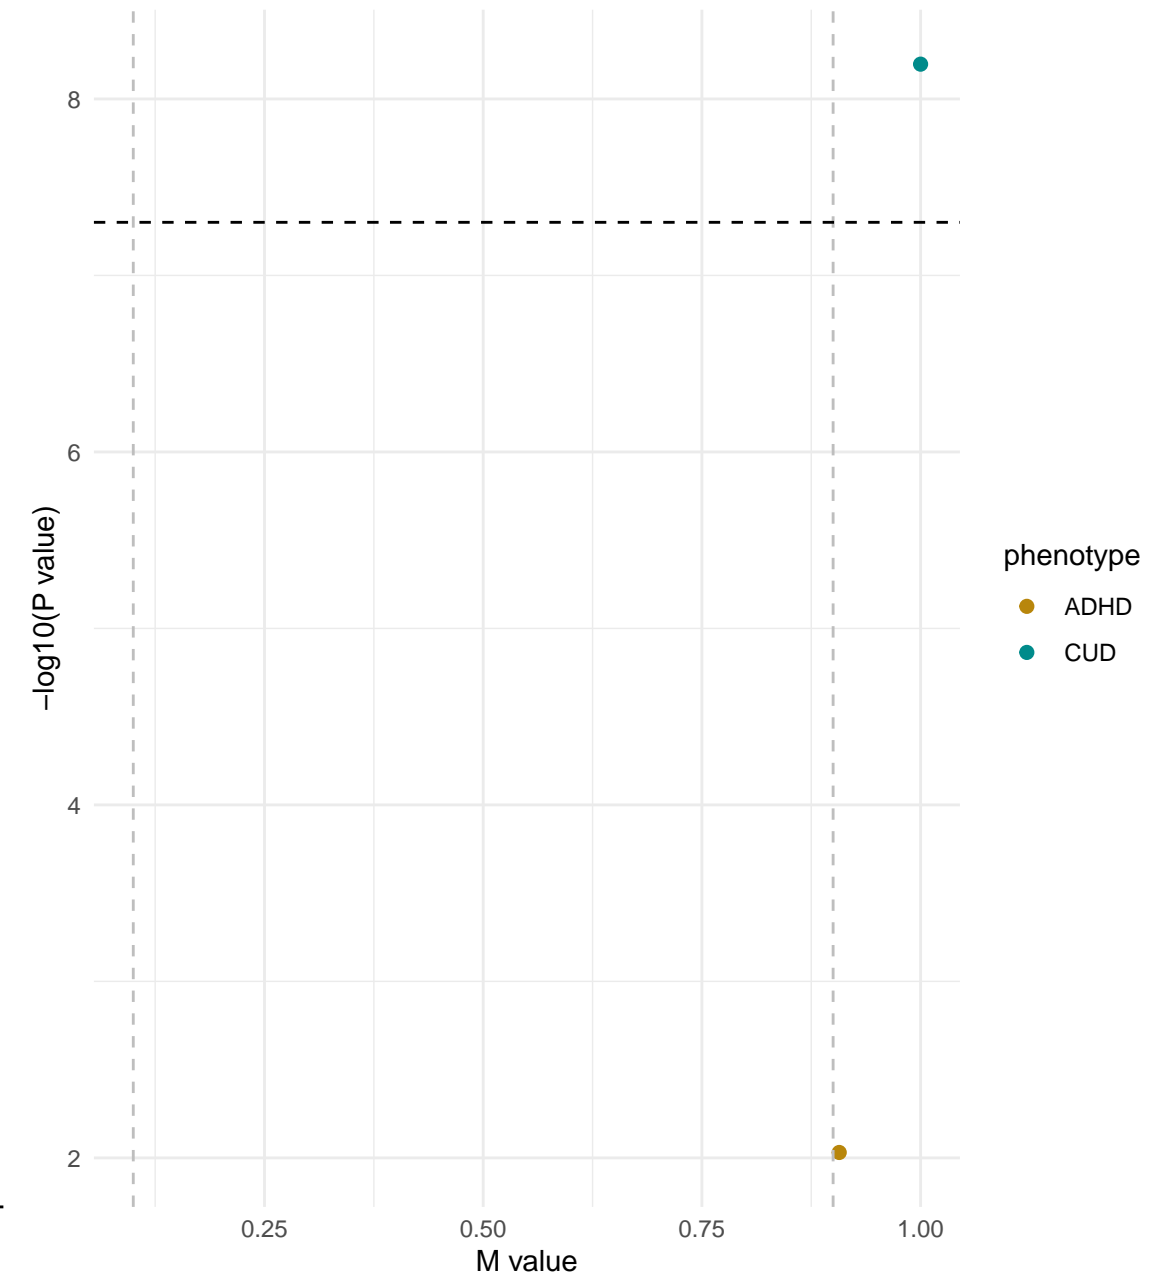

Lead SNP: rs3774800

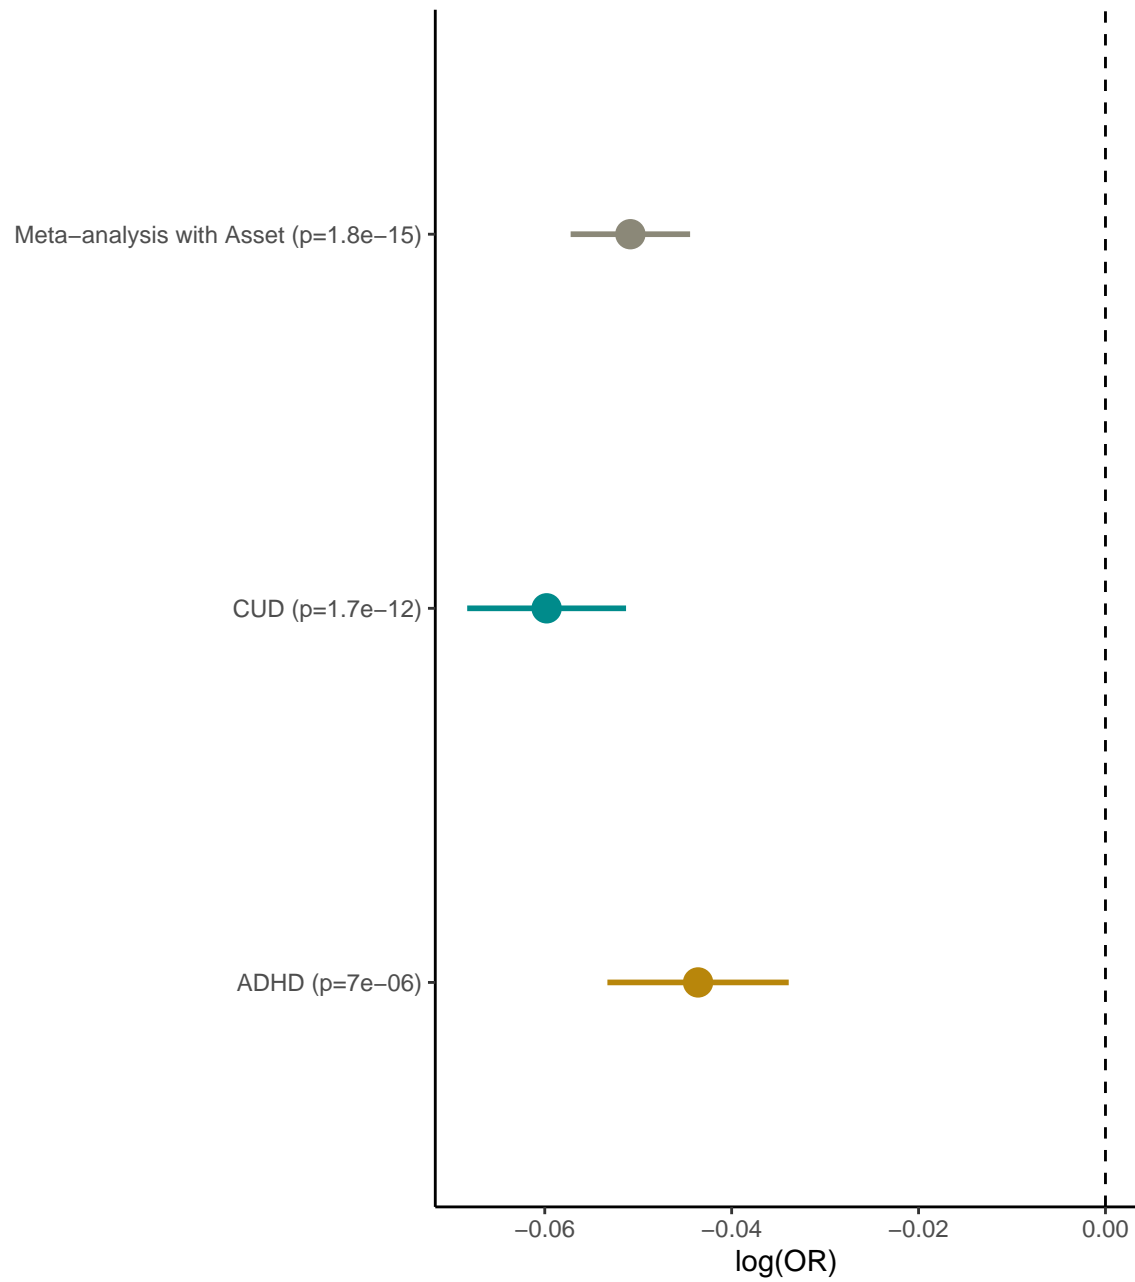

PM-Plot

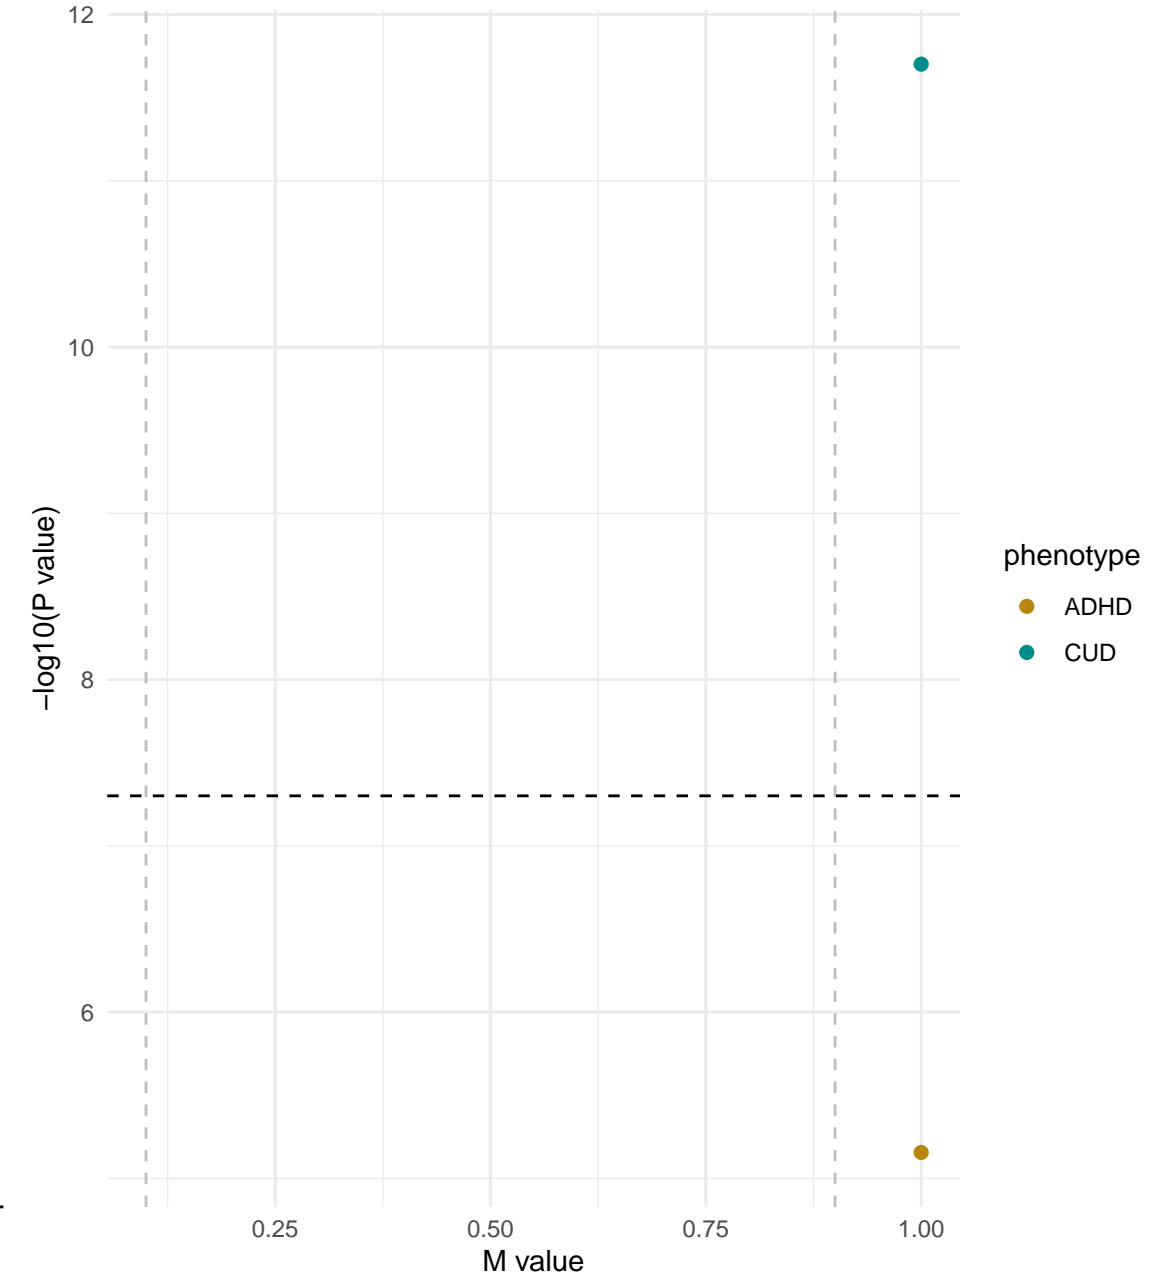



Lead SNP: rs4416248

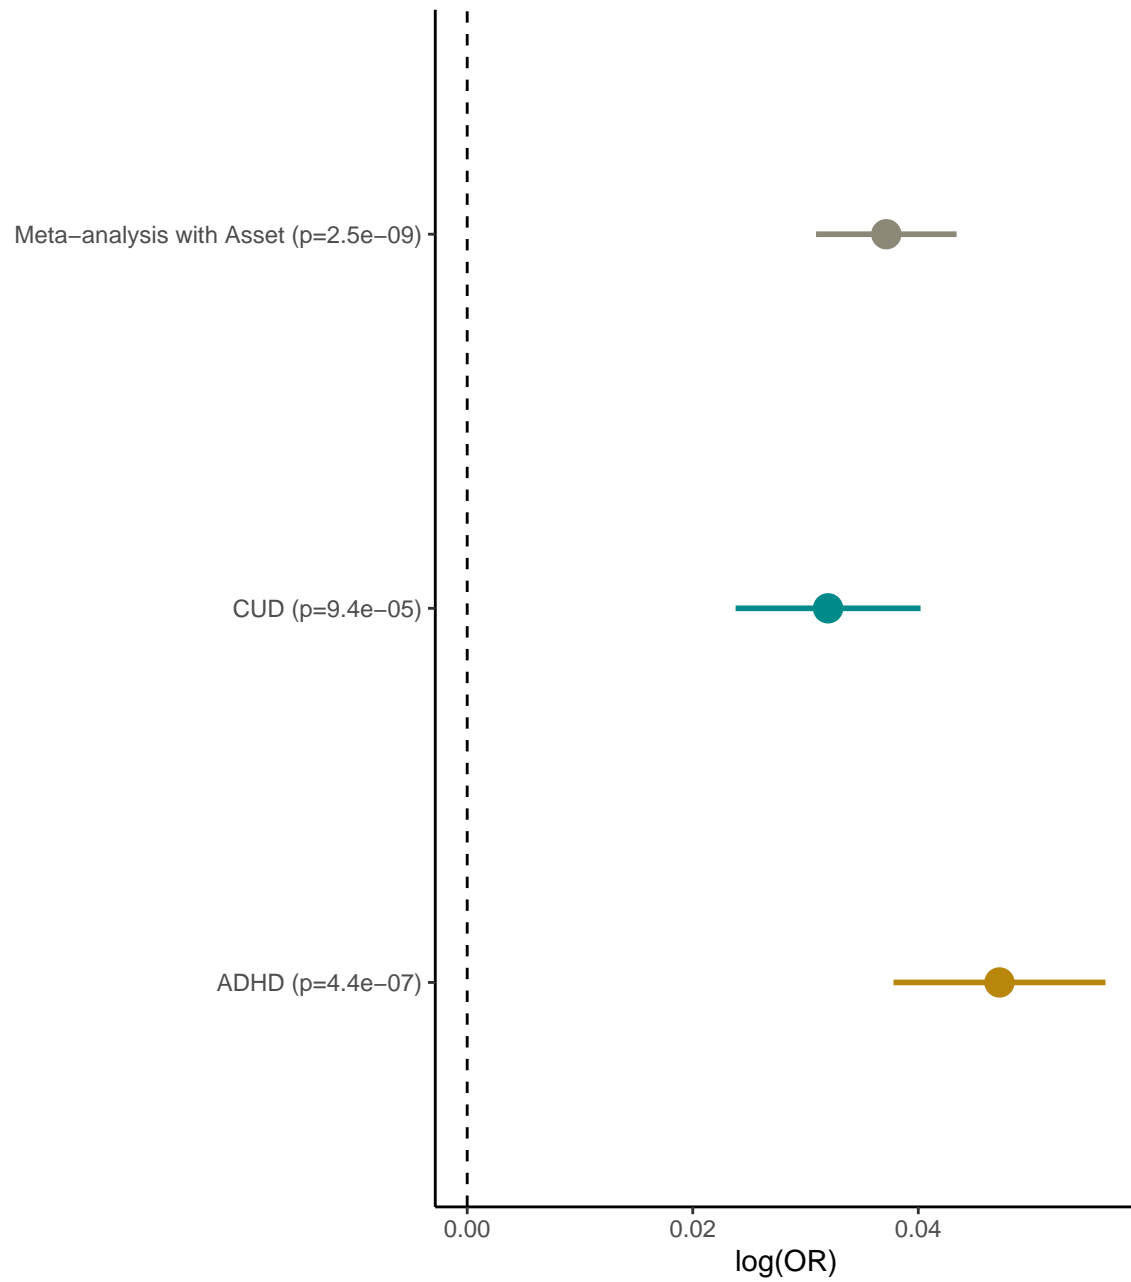

PM-Plot

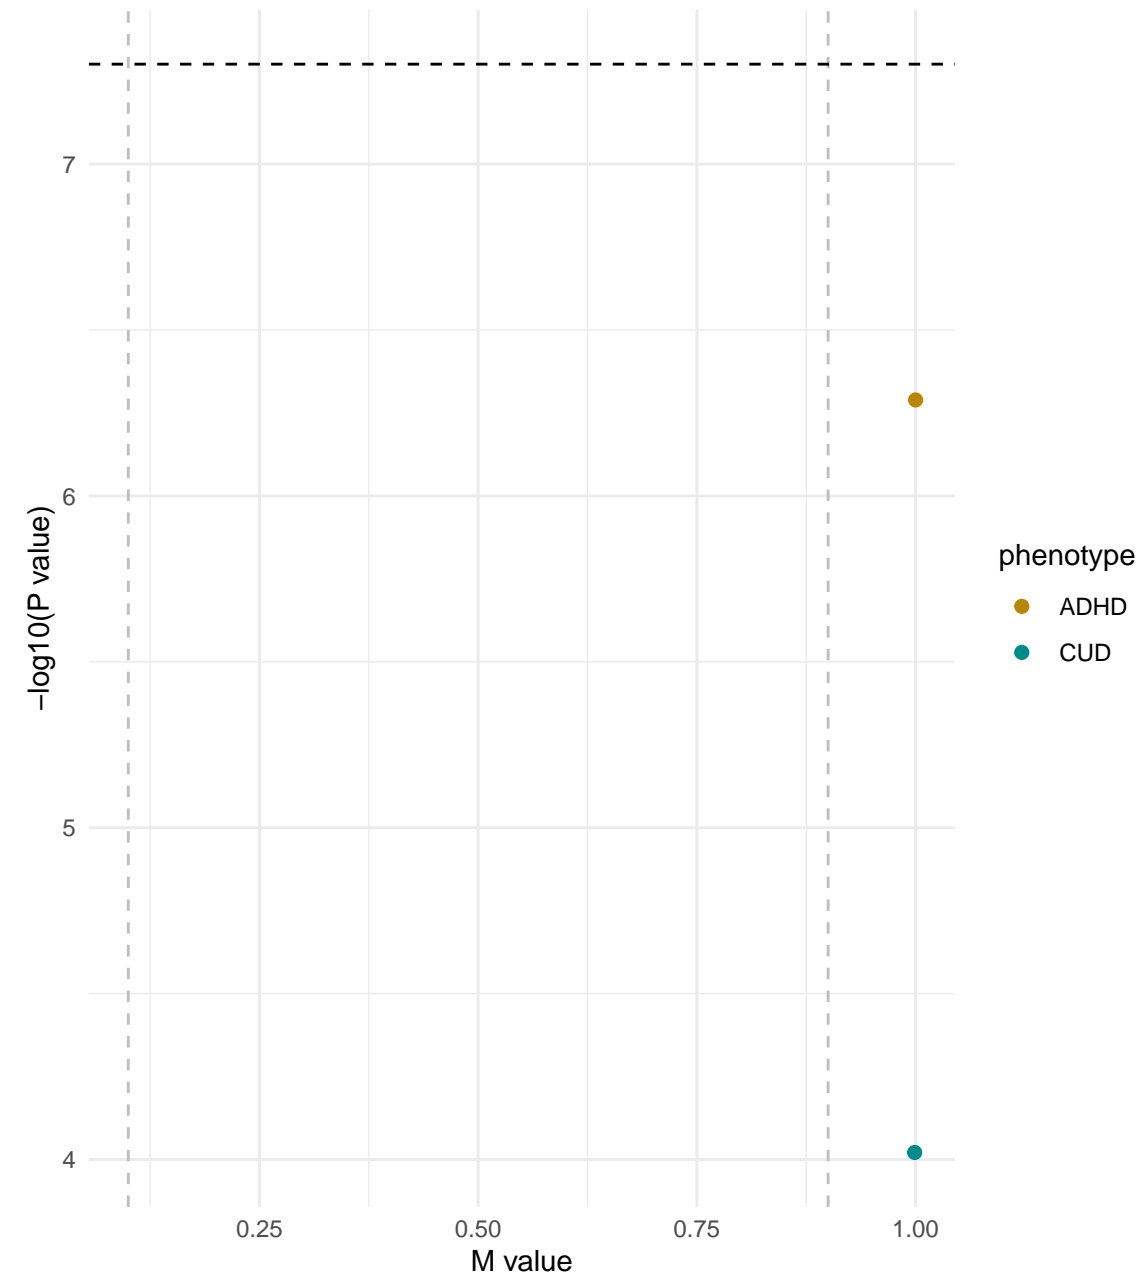

Lead SNP: rs4448553

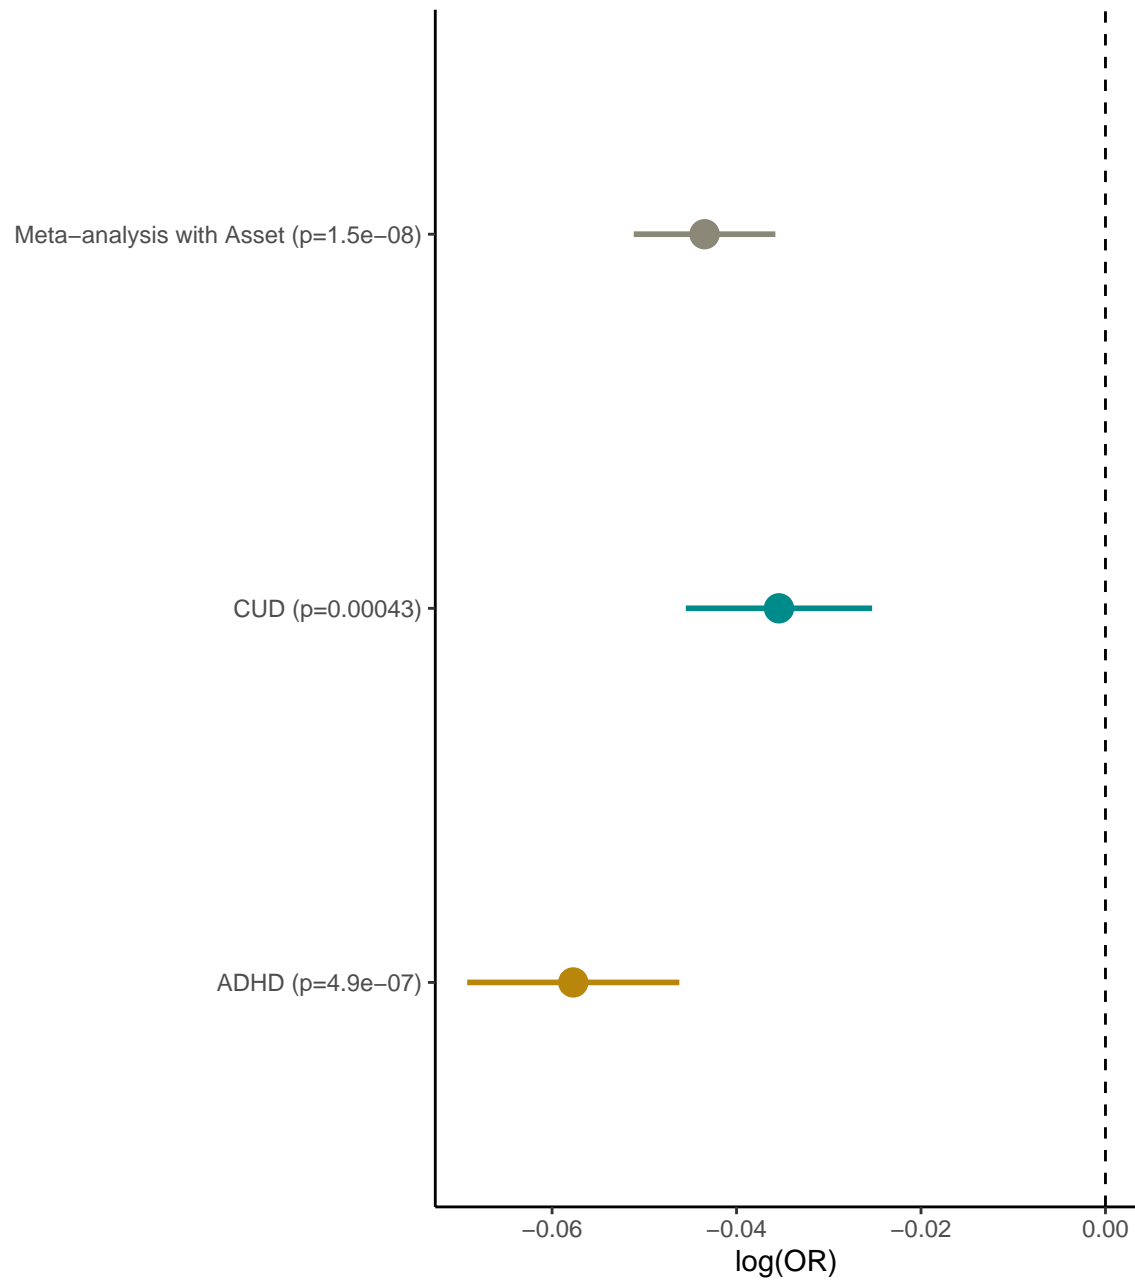

PM-Plot

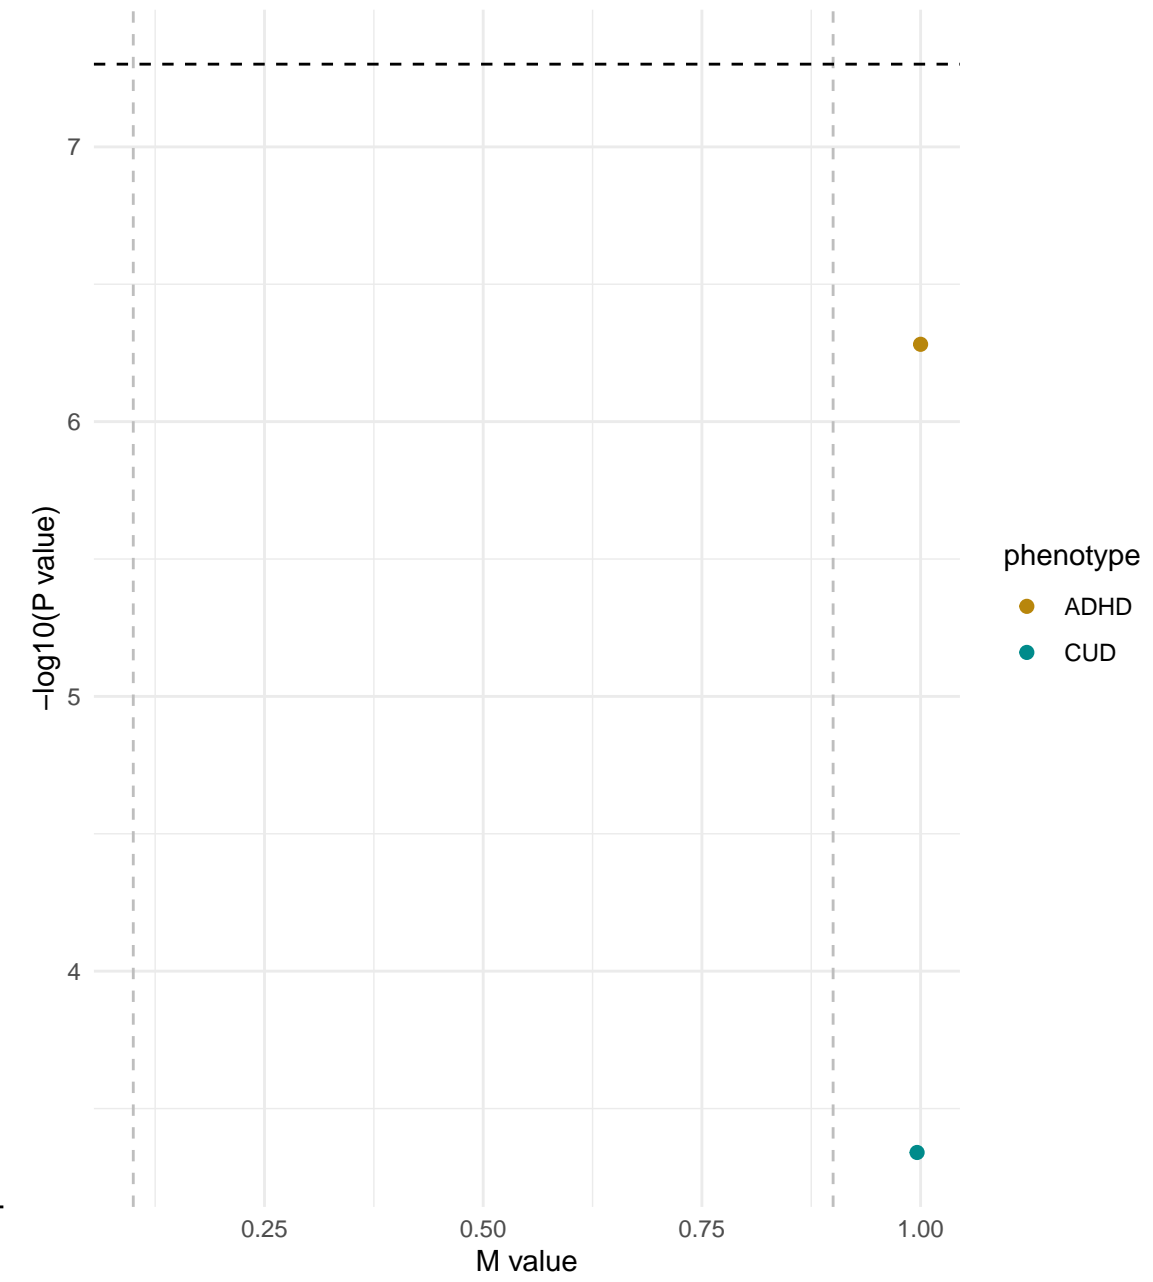

Lead SNP: rs6452785

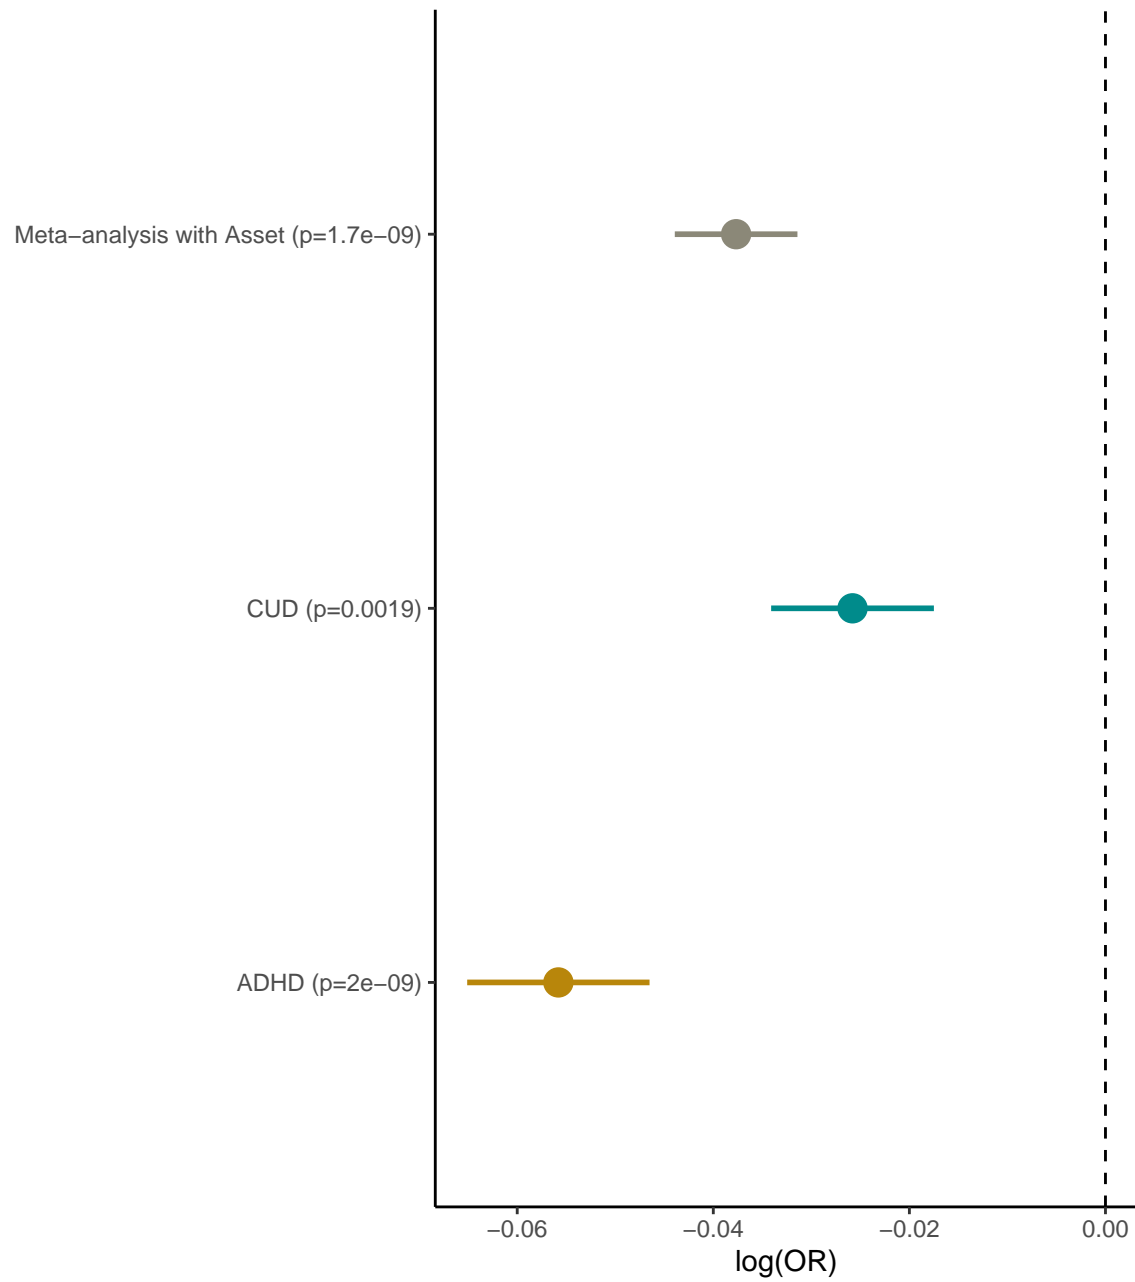

PM-Plot

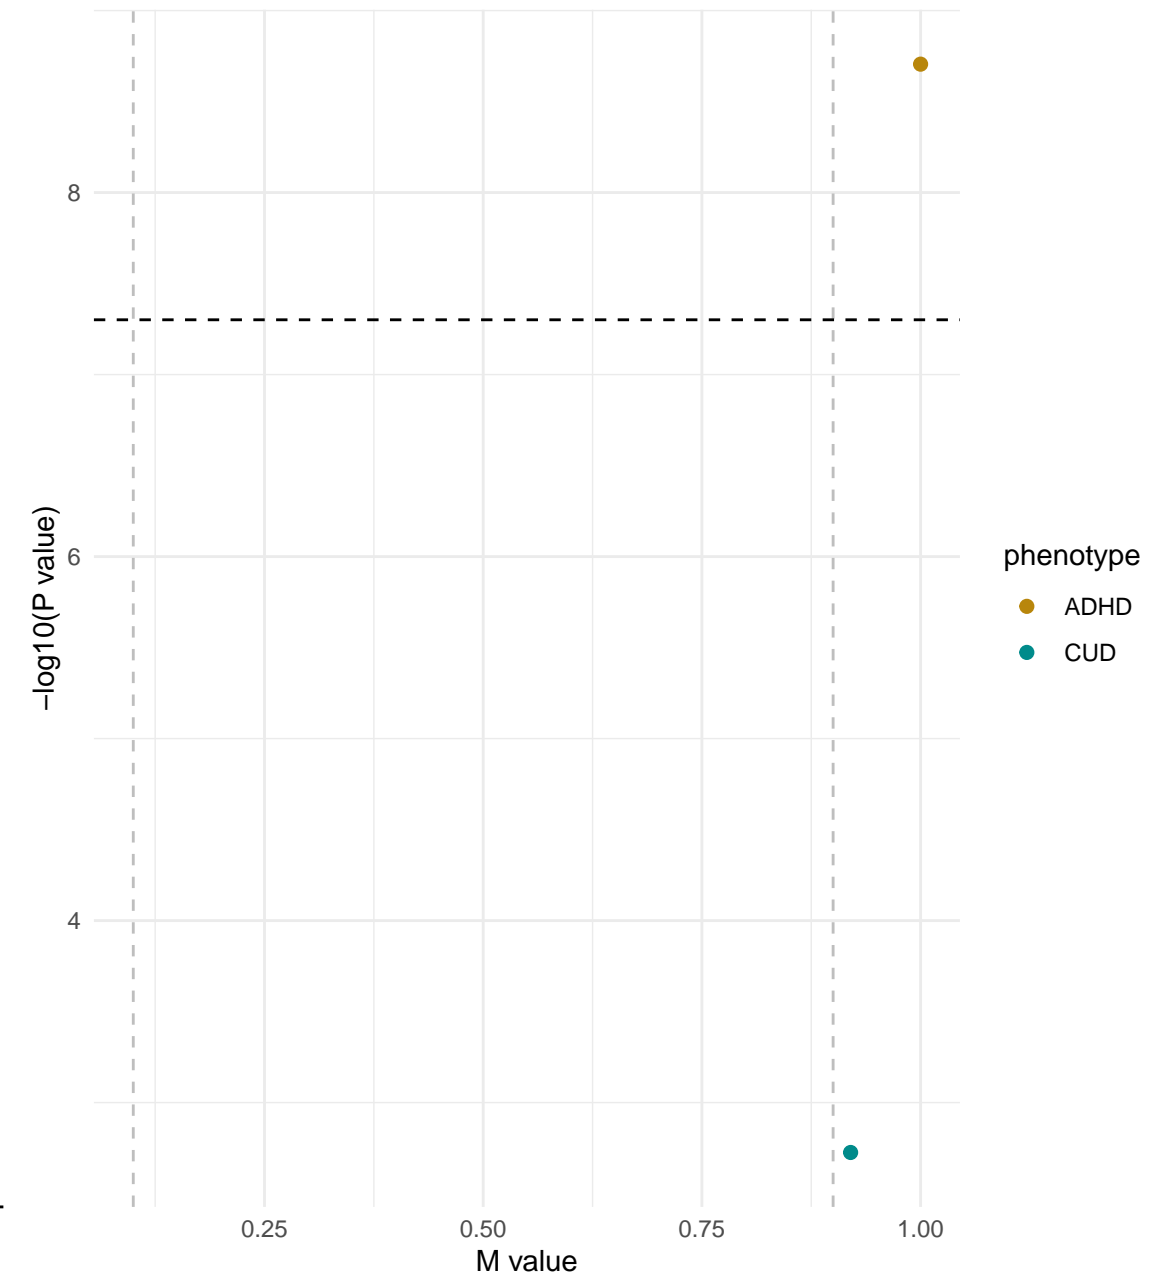

Lead SNP: rs6589386

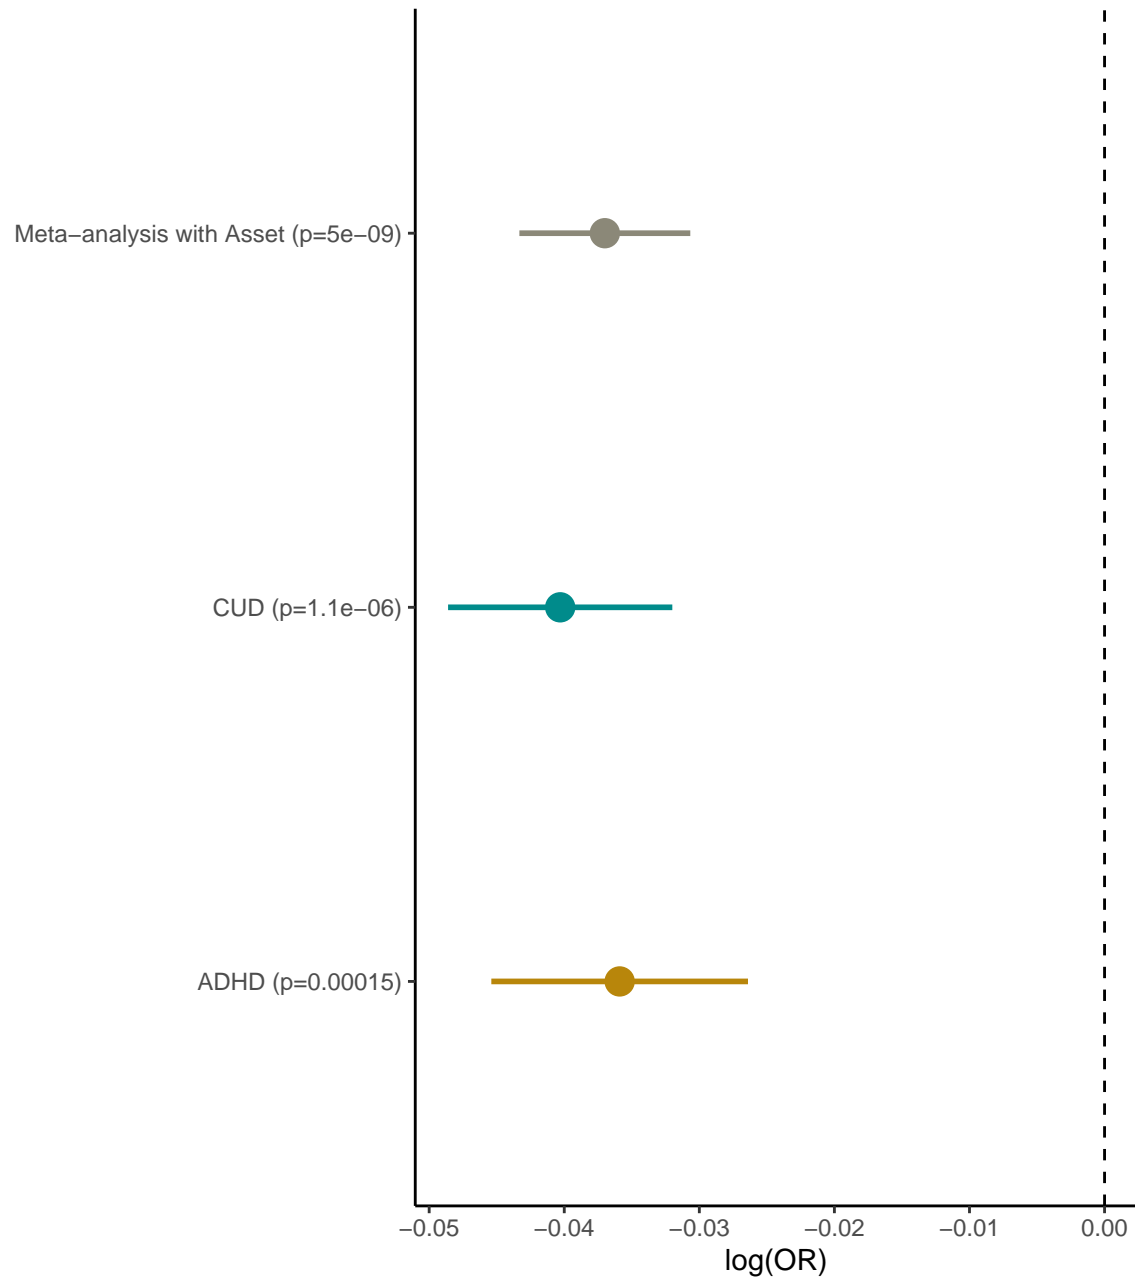

PM-Plot

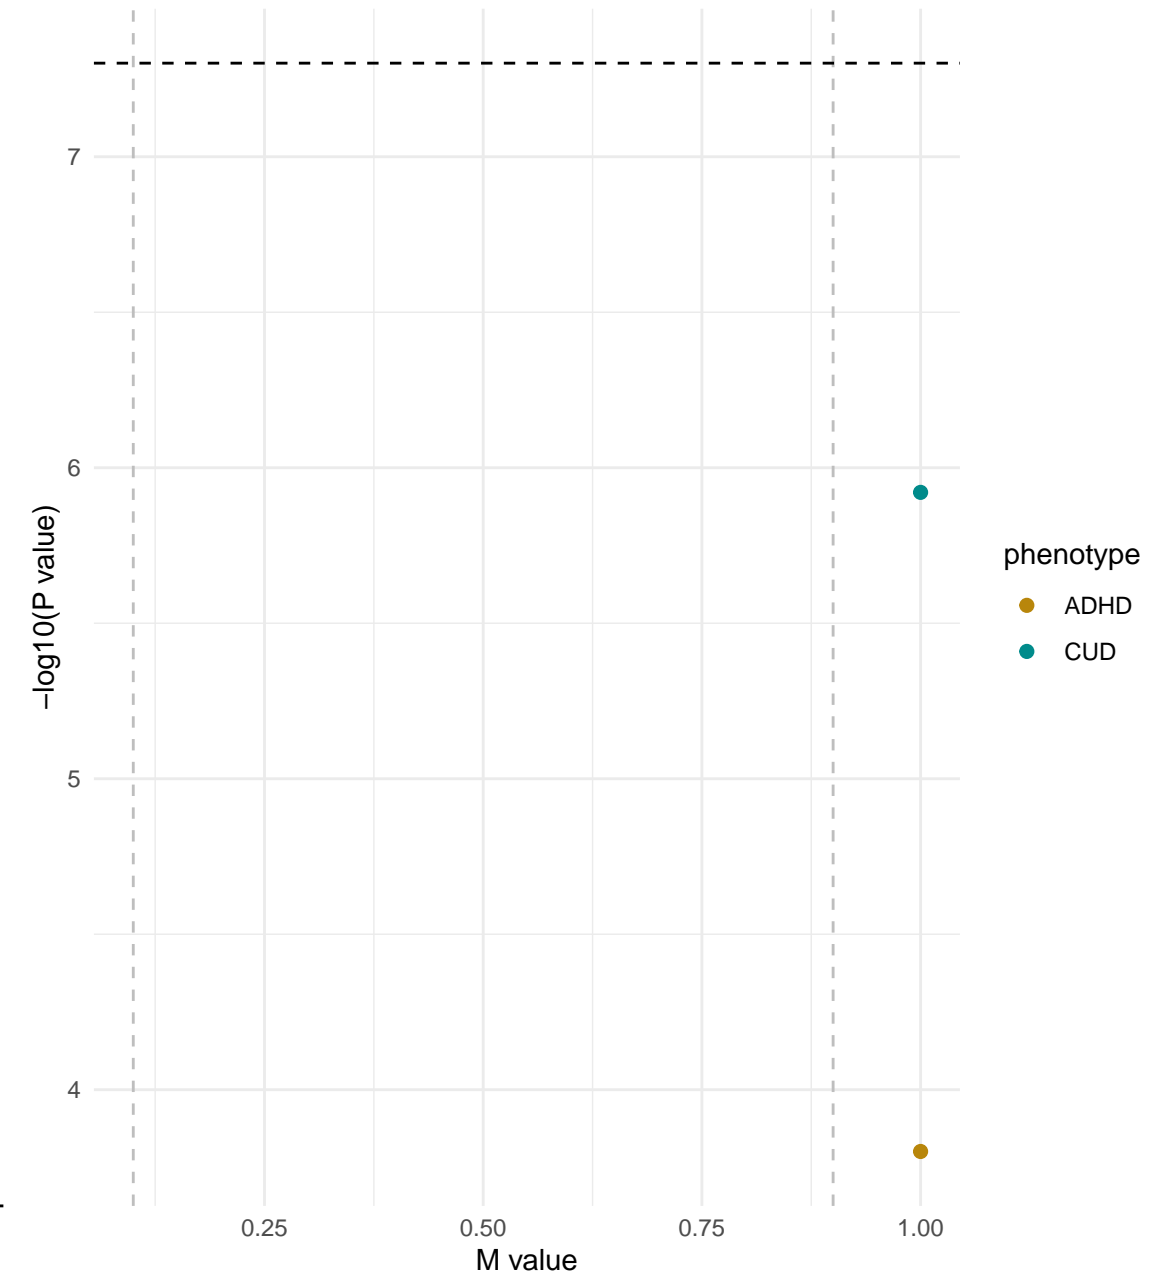

Lead SNP: rs7160672

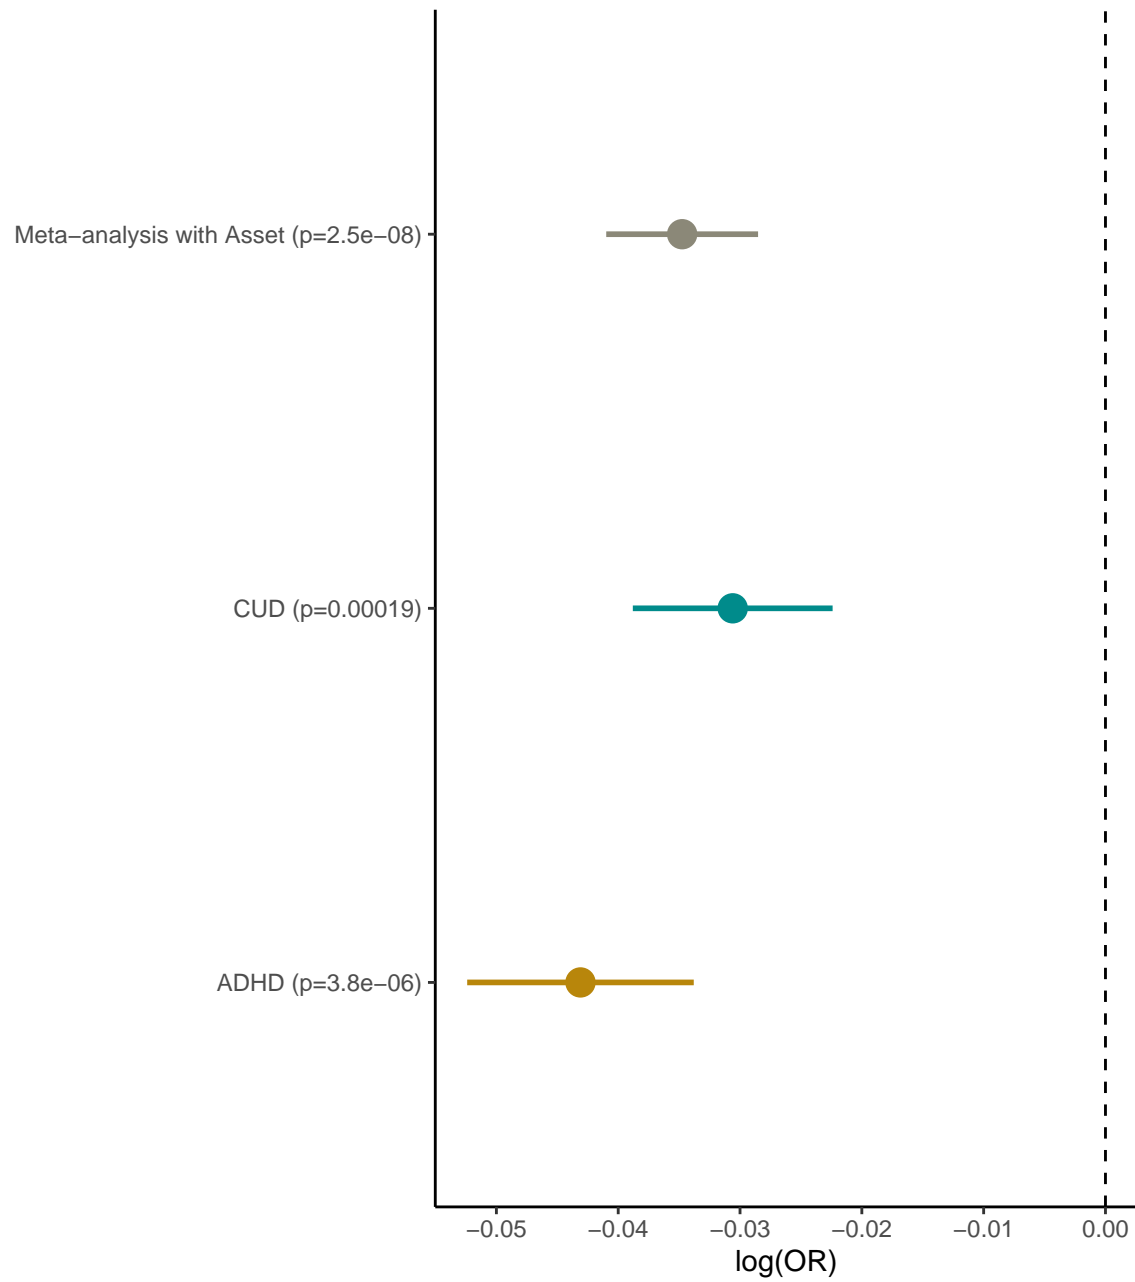

PM-Plot

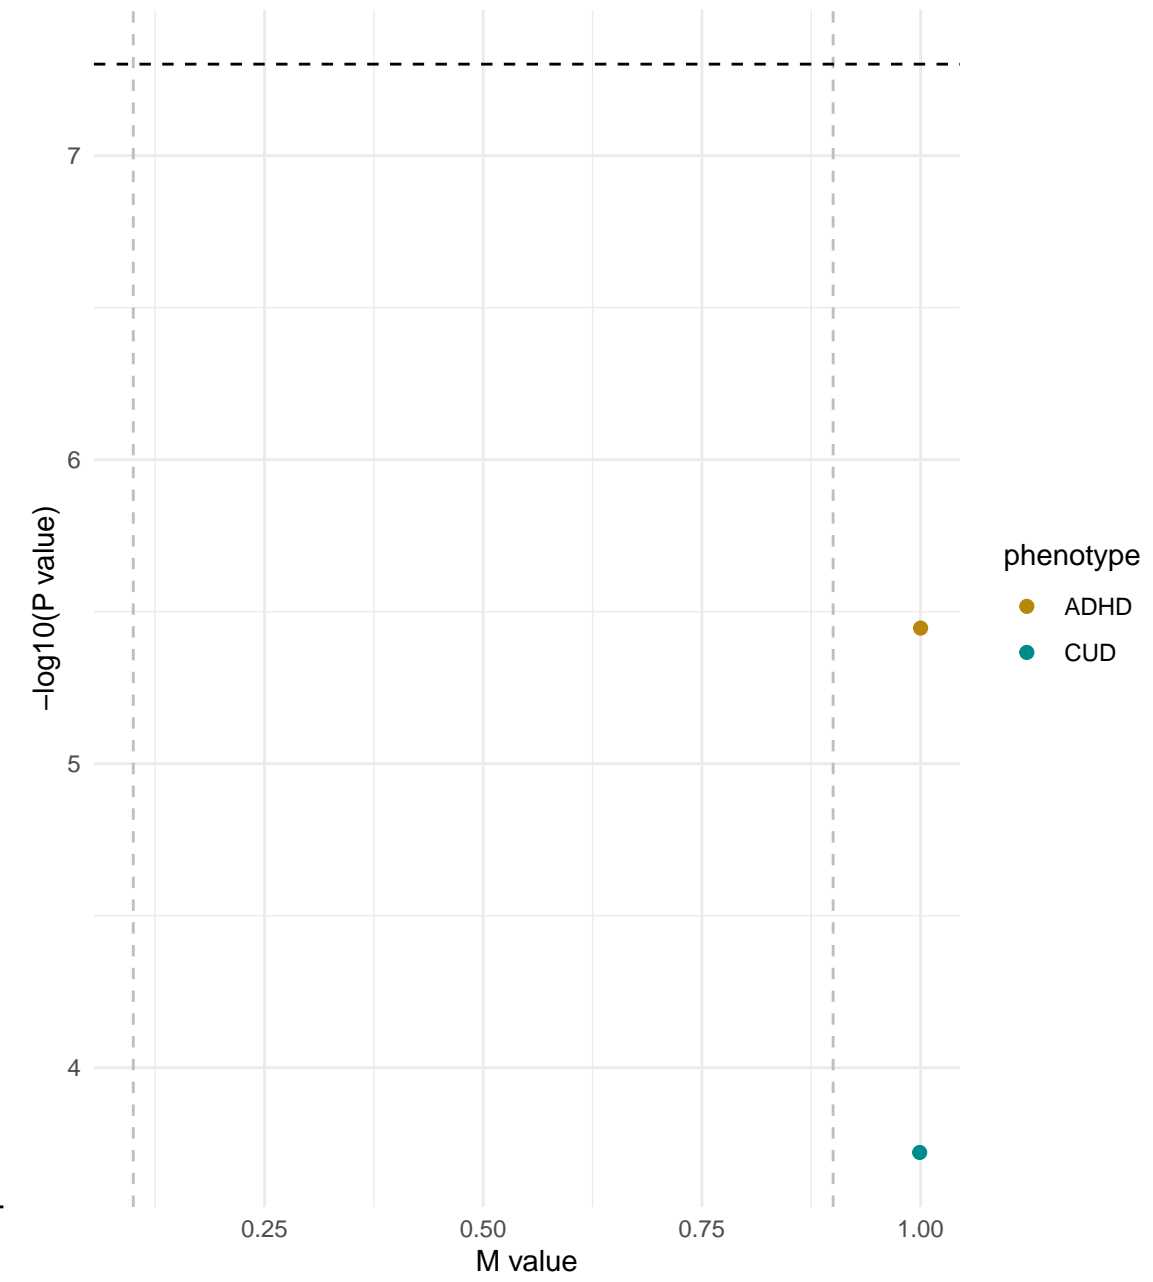

Lead SNP: rs7445539

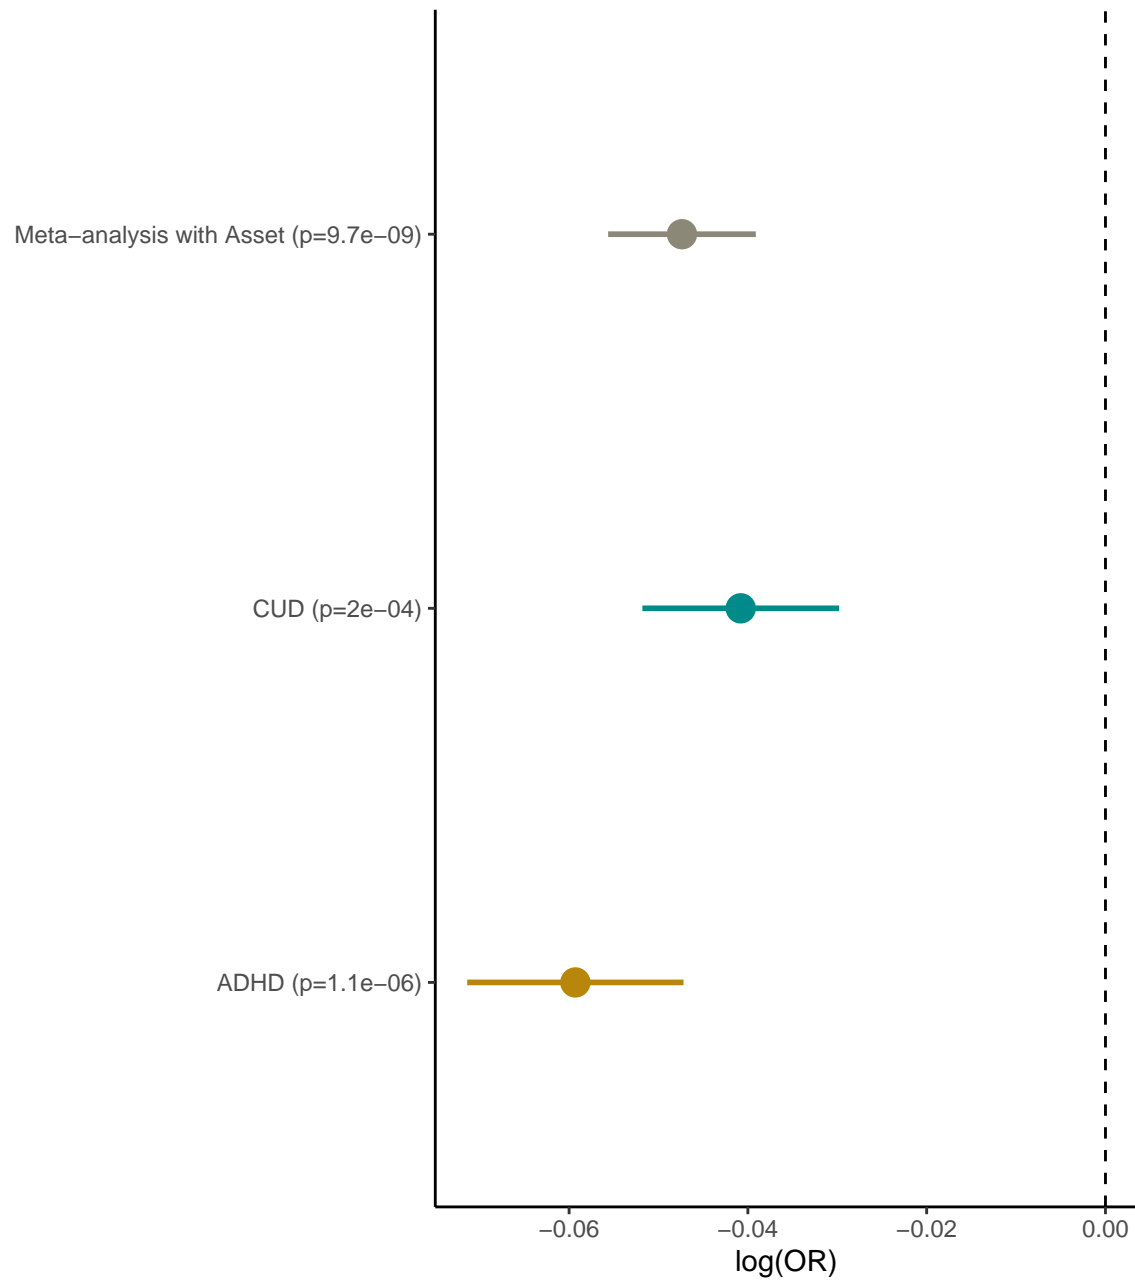

PM-Plot

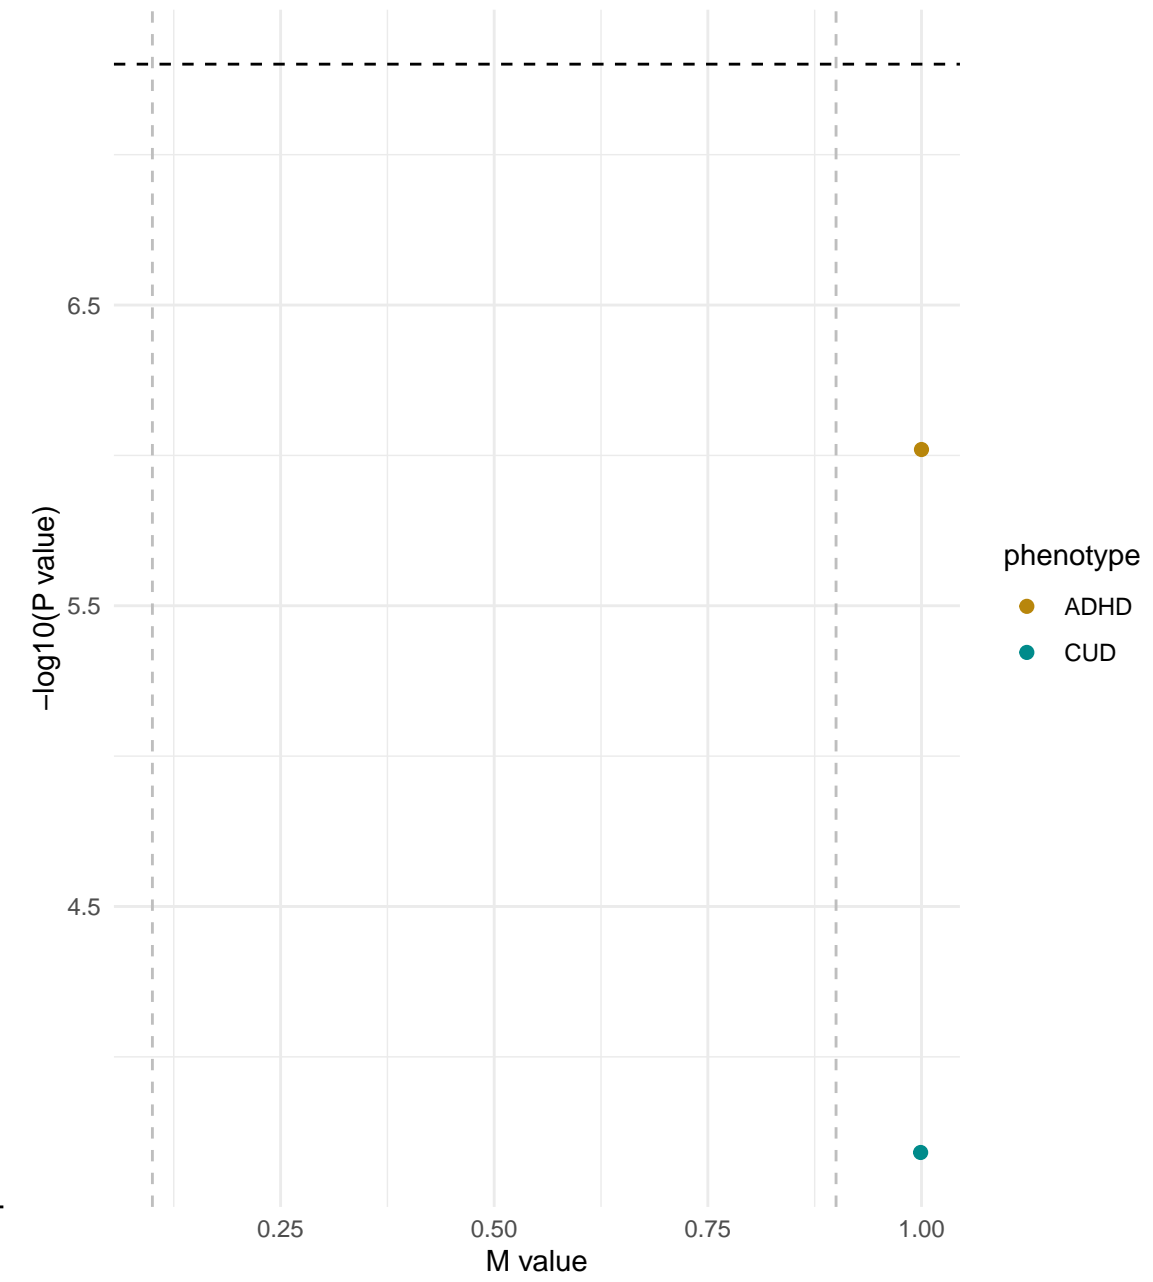

Lead SNP: rs7506909

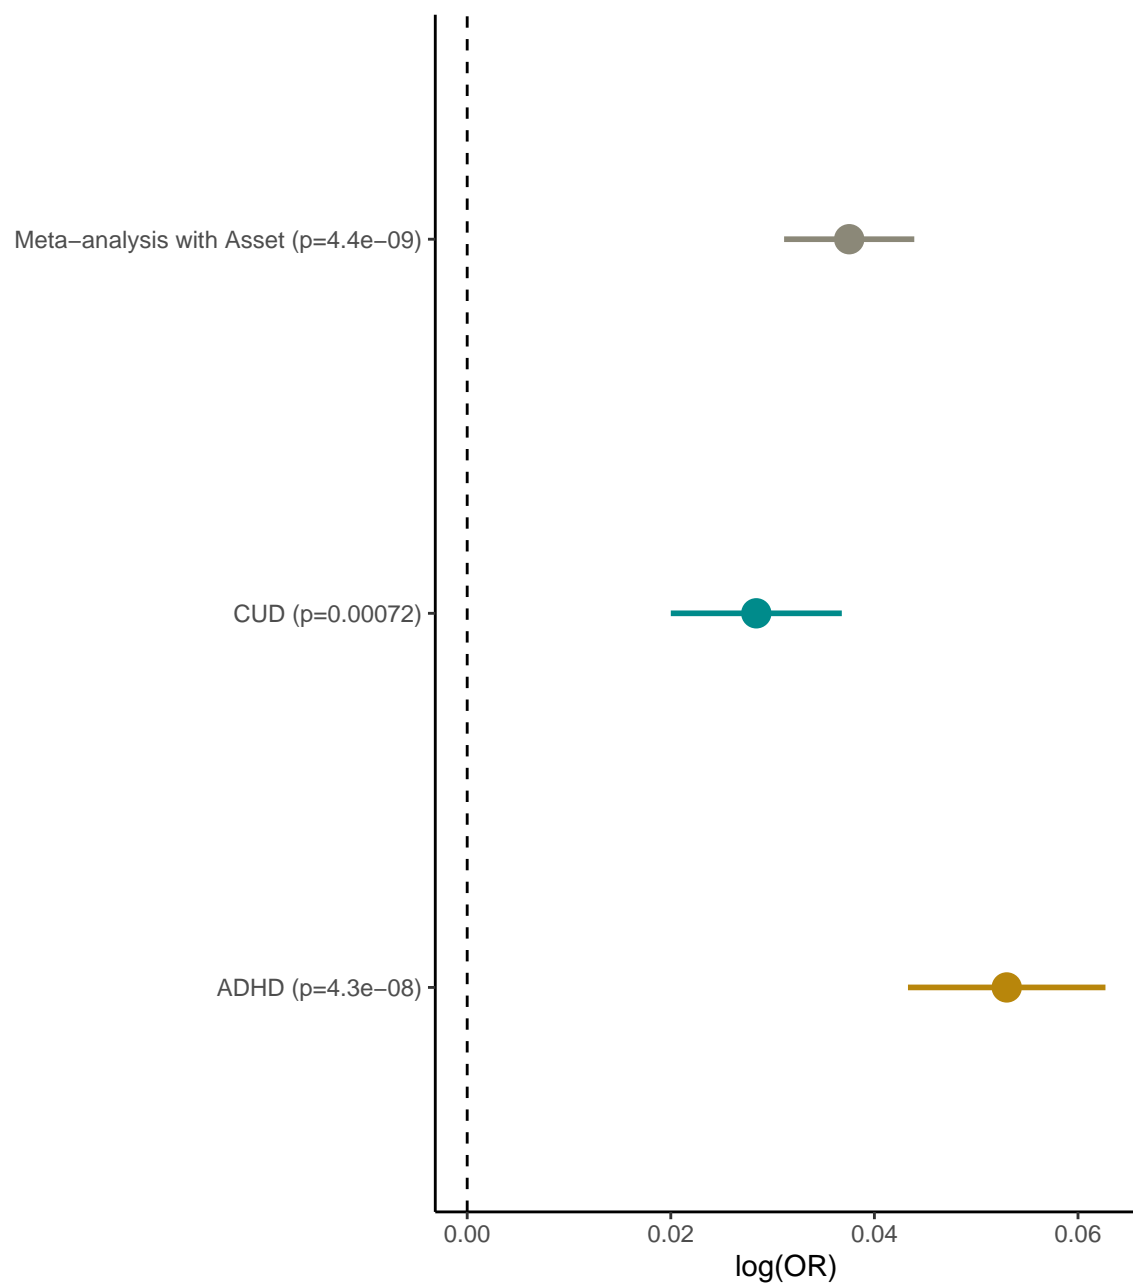

PM-Plot

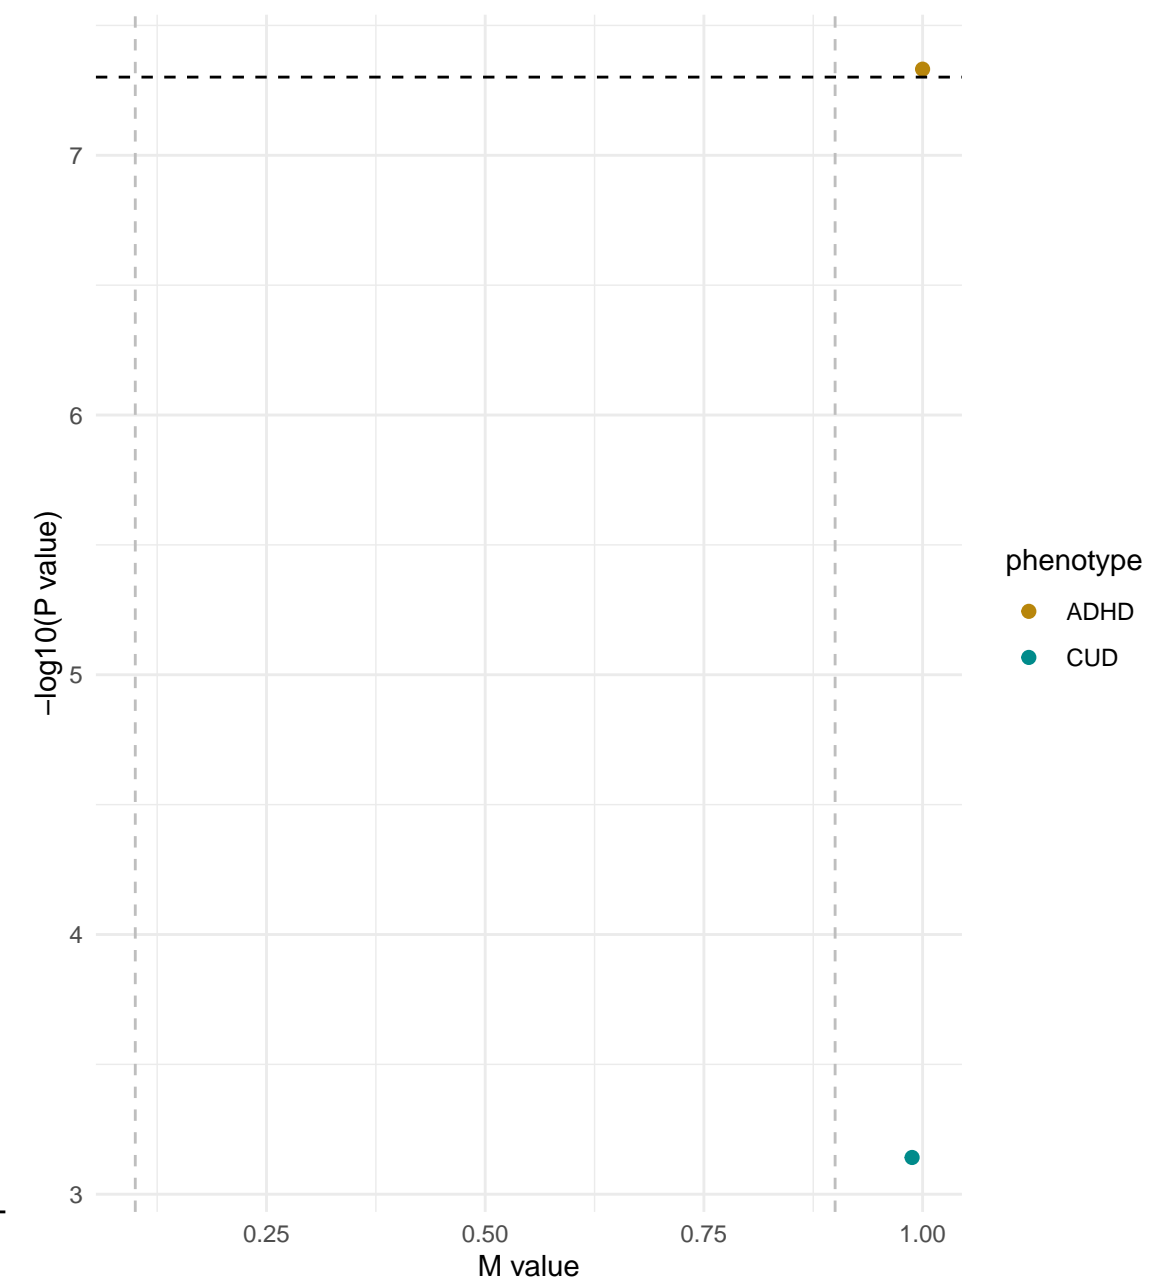

Lead SNP: rs7839435

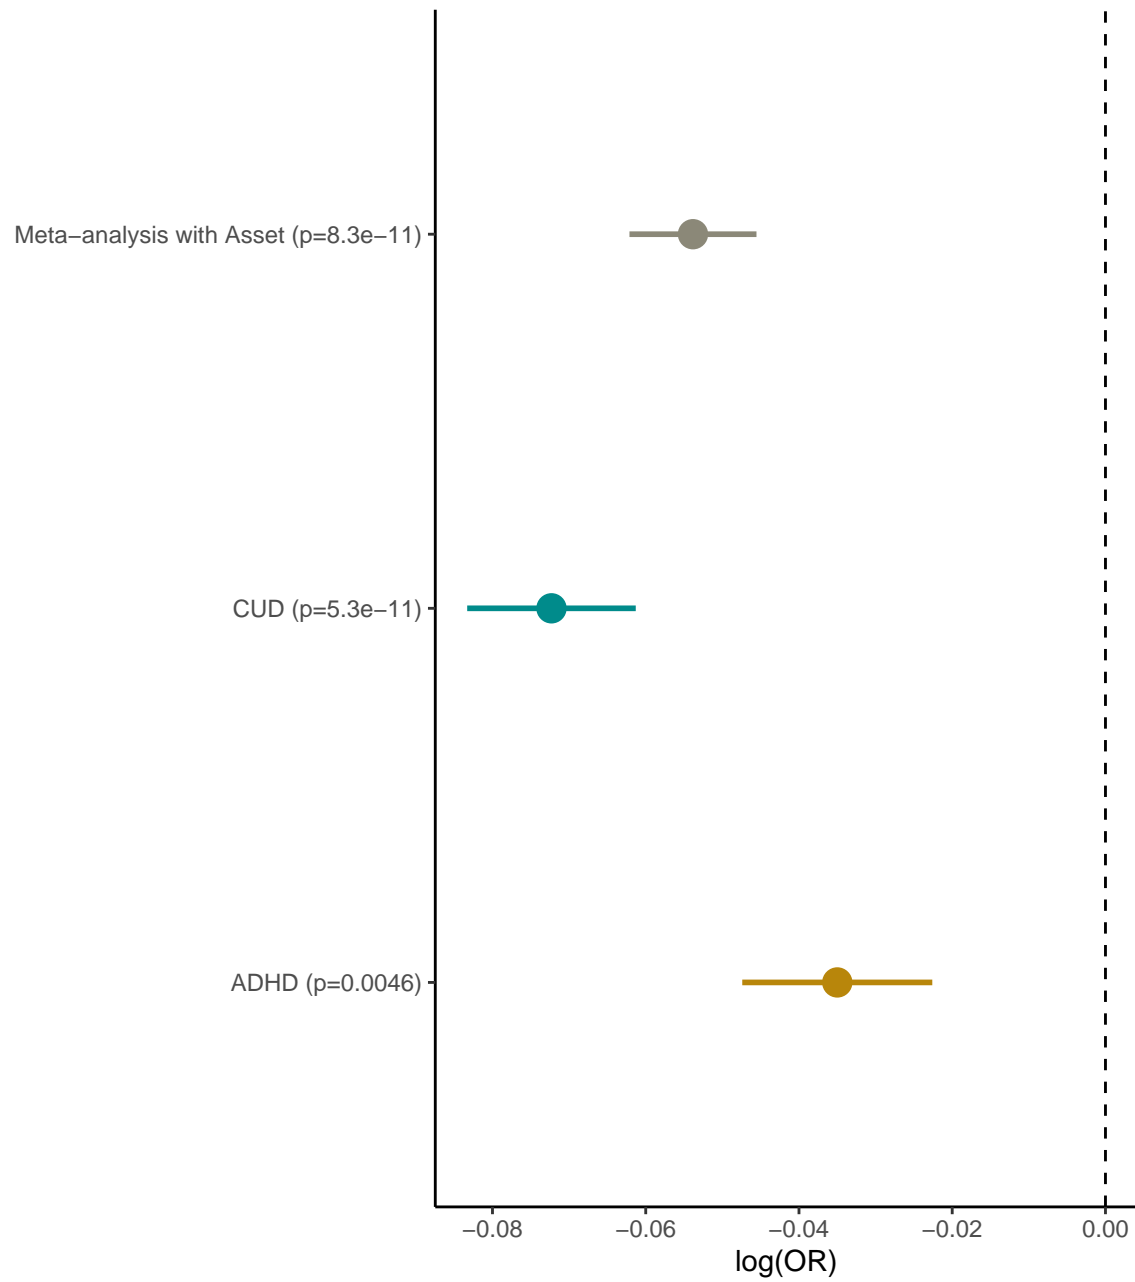

PM-Plot

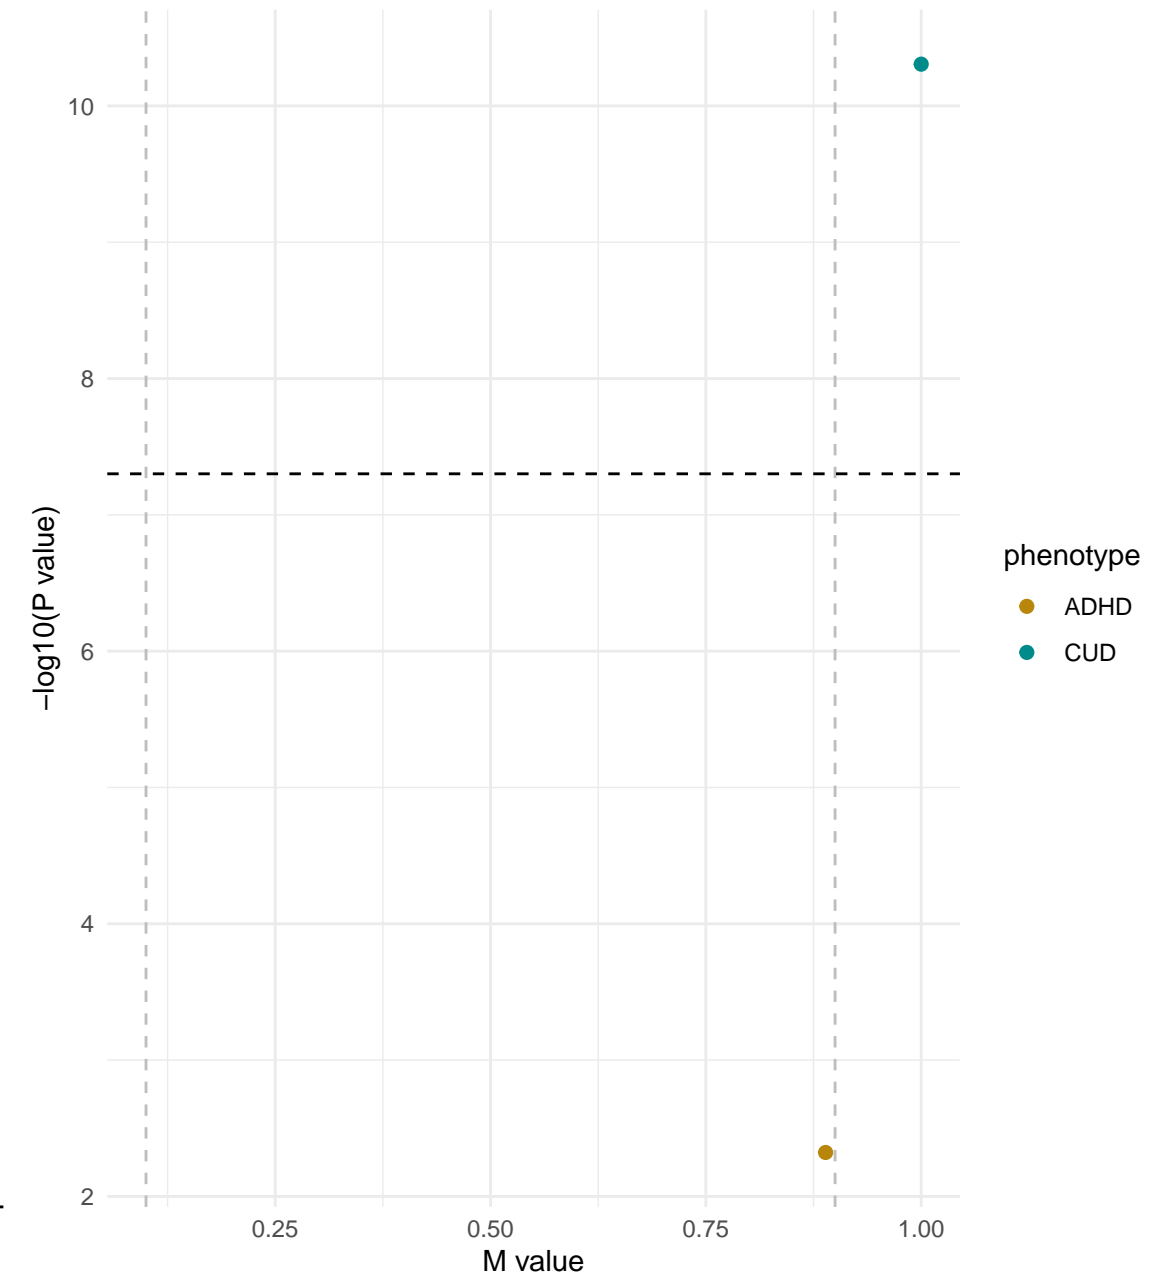



Lead SNP: rs7954204

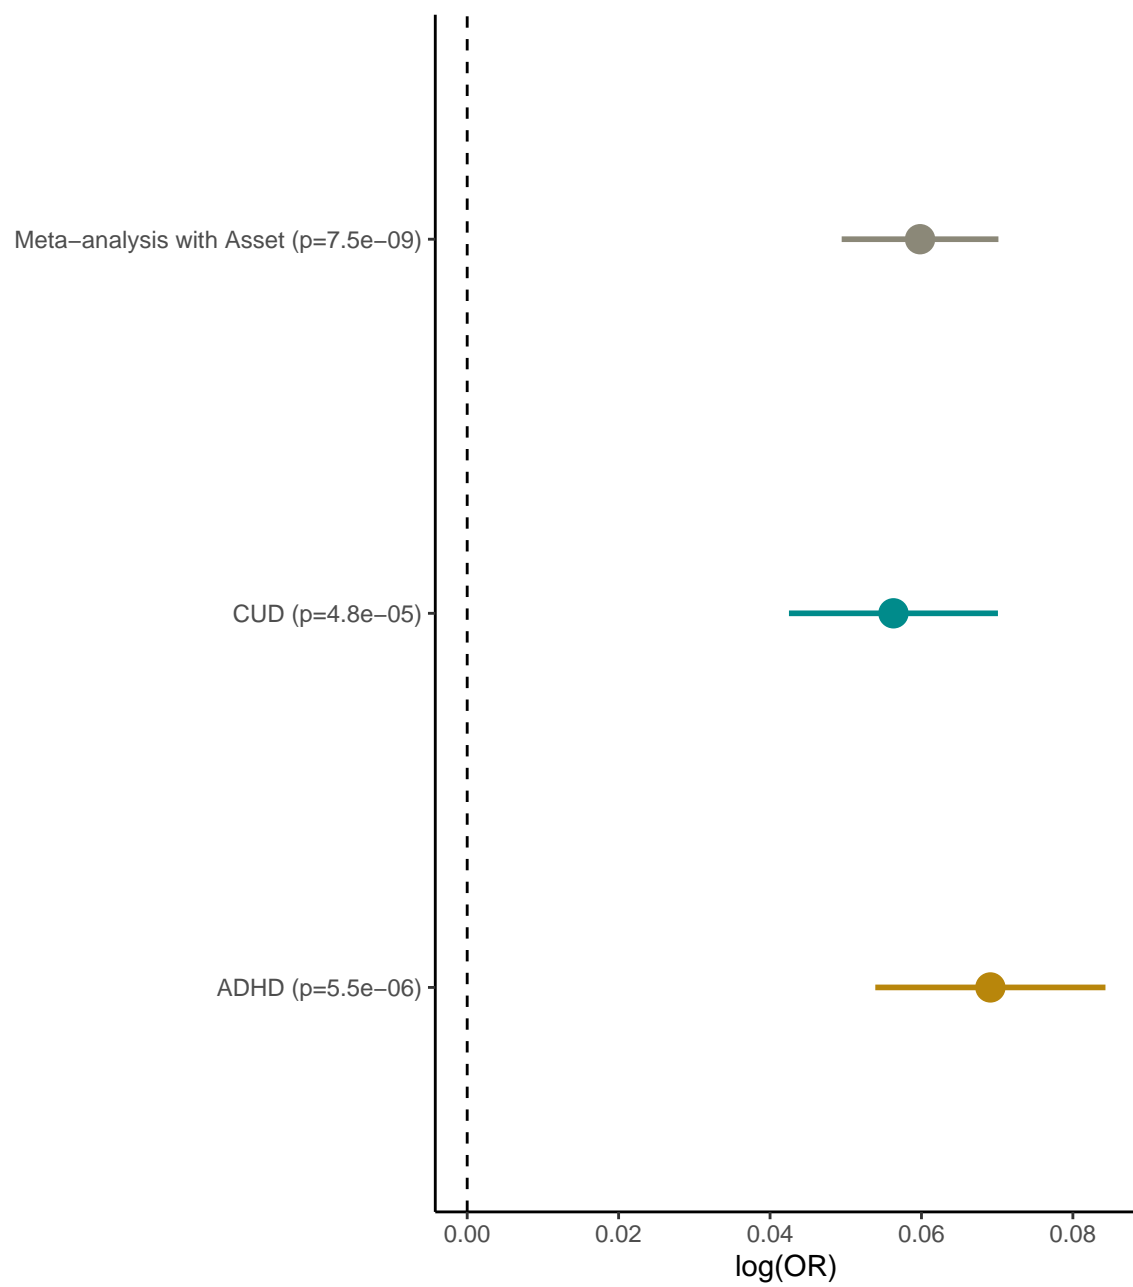

PM-Plot

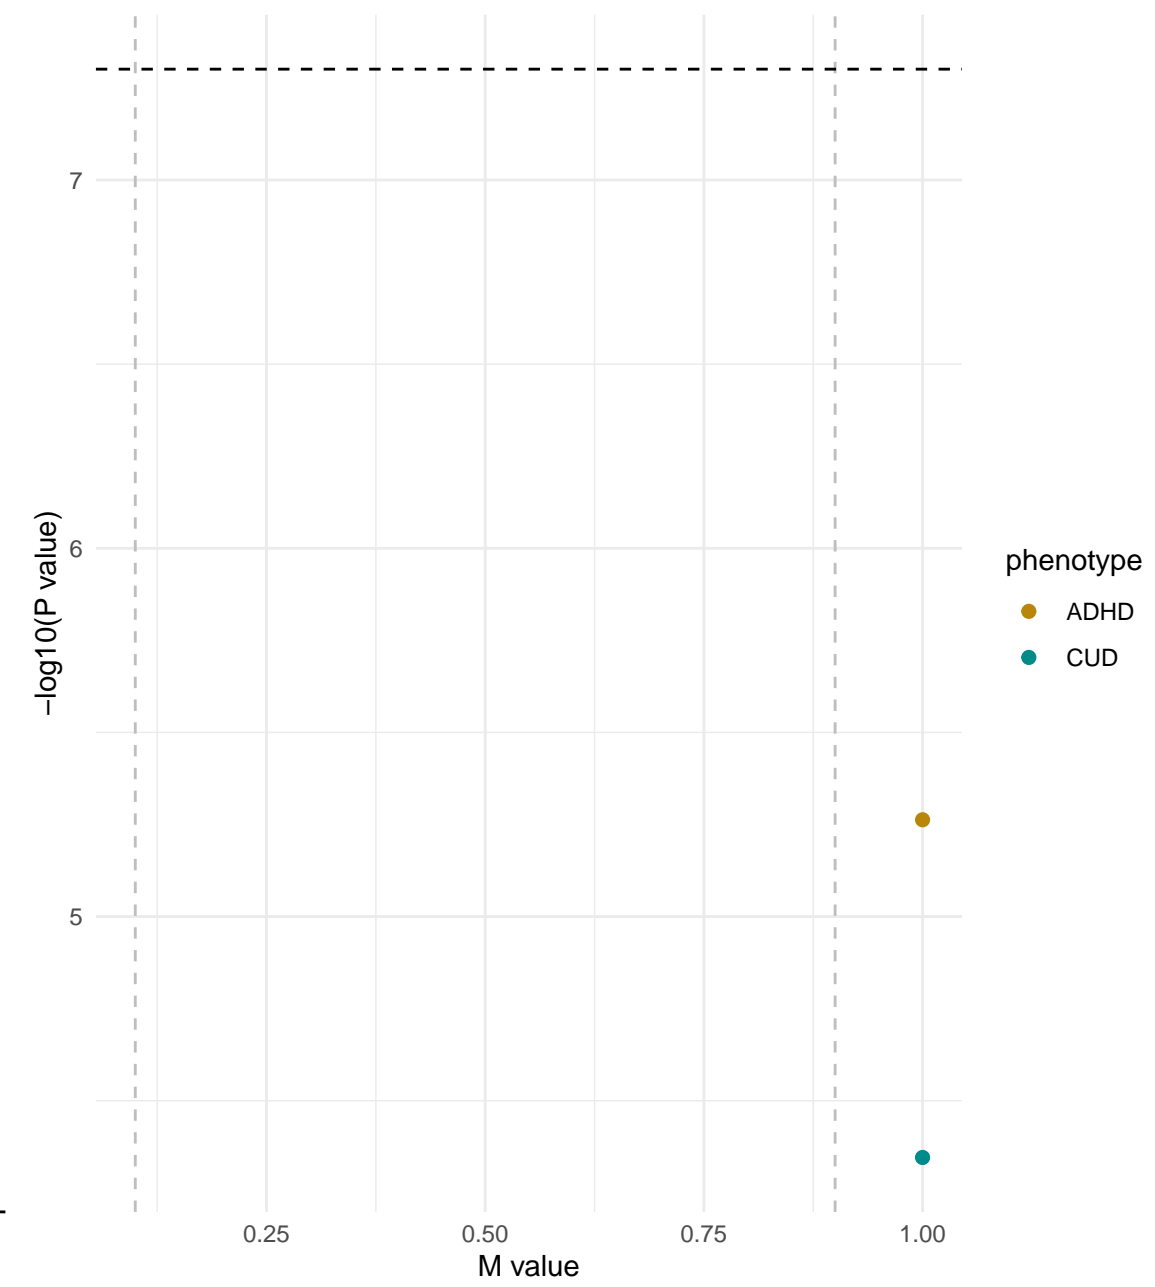

Lead SNP: rs8016504

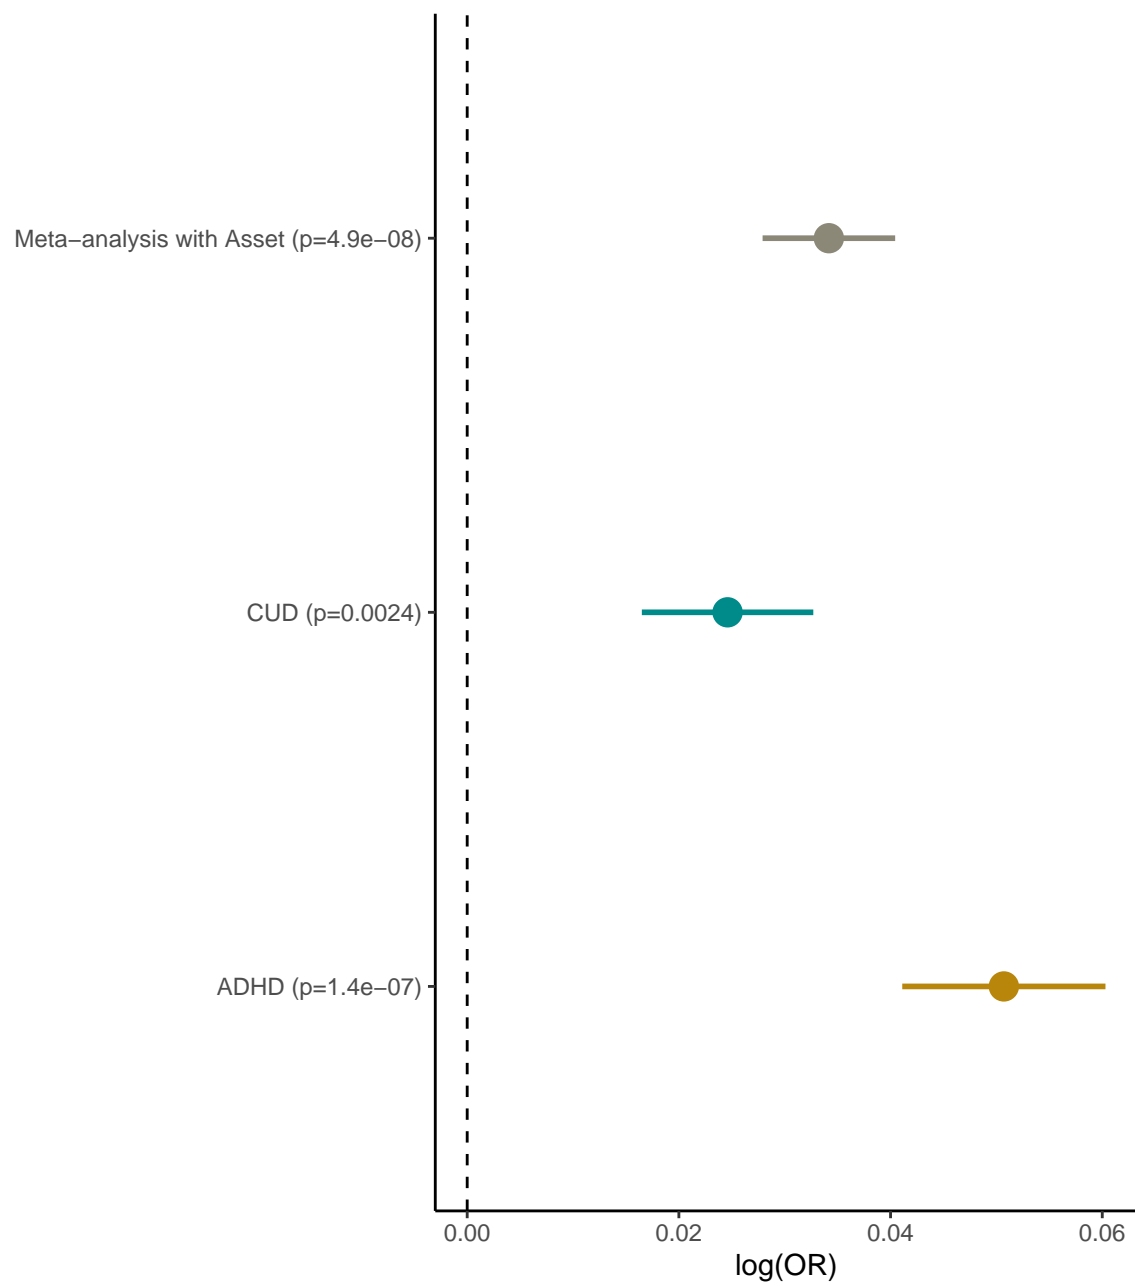

PM-Plot

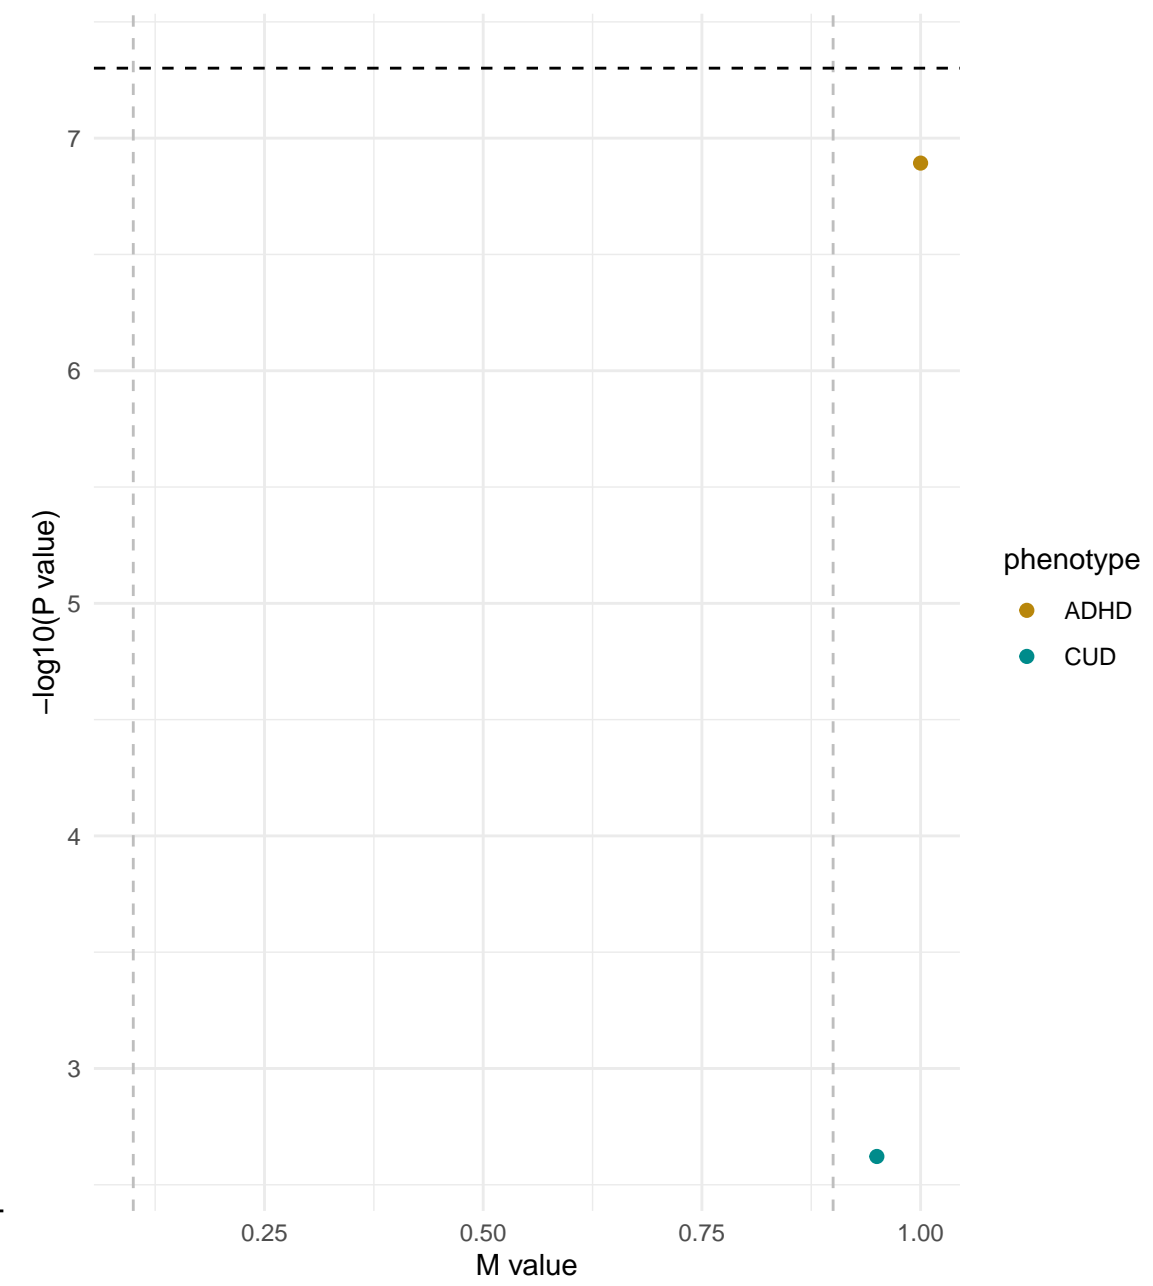

Lead SNP: rs10143566

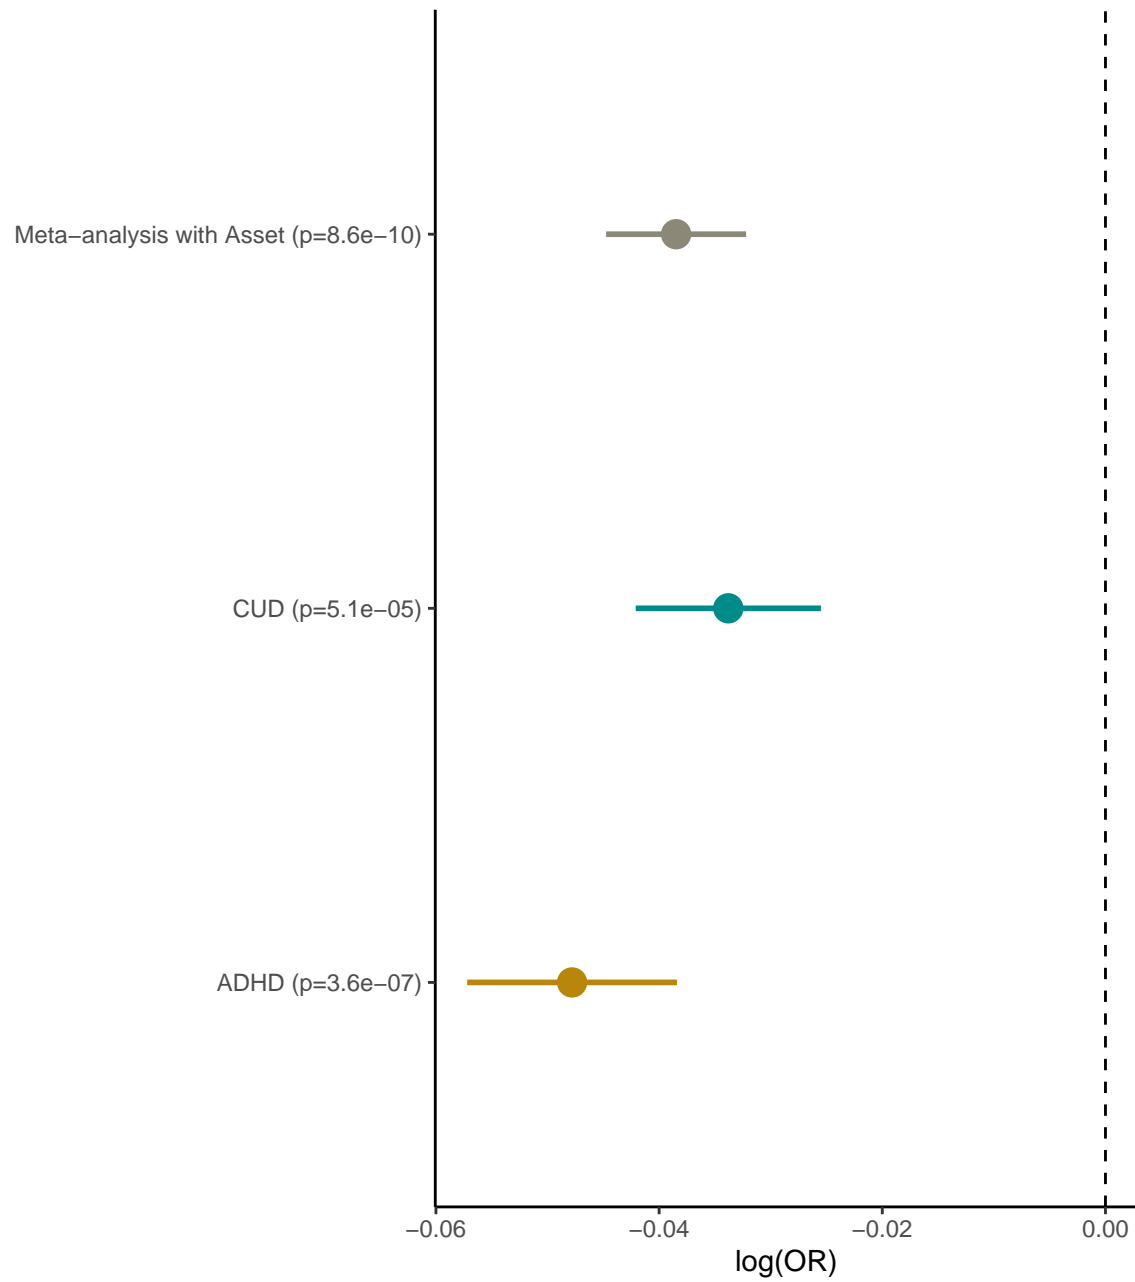

PM-Plot

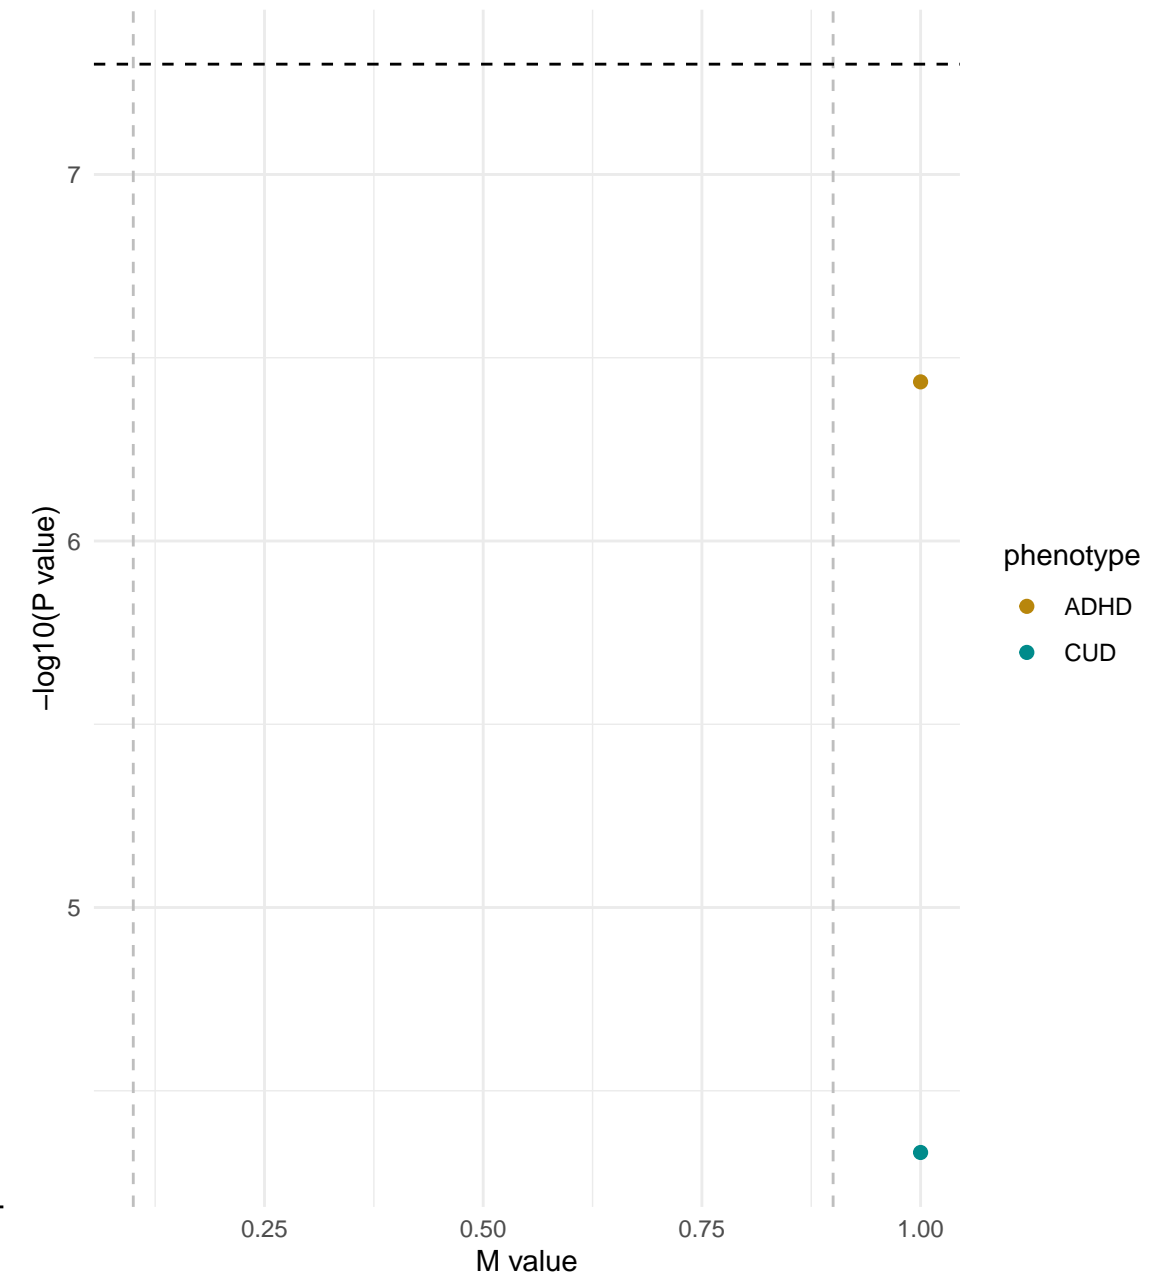

Lead SNP: rs10819035

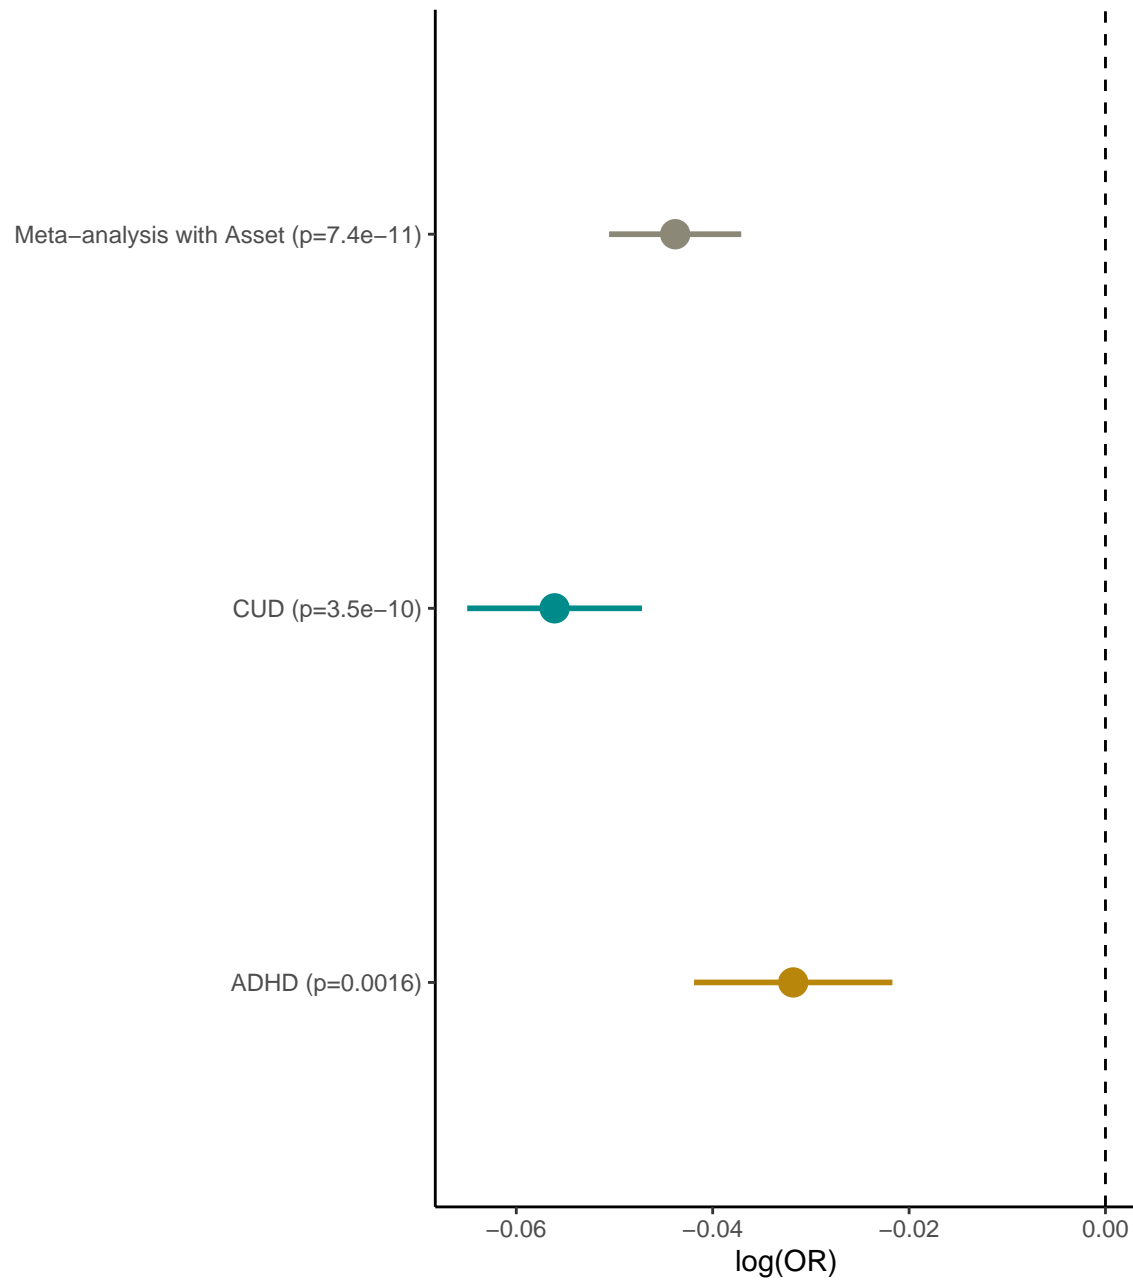

PM-Plot

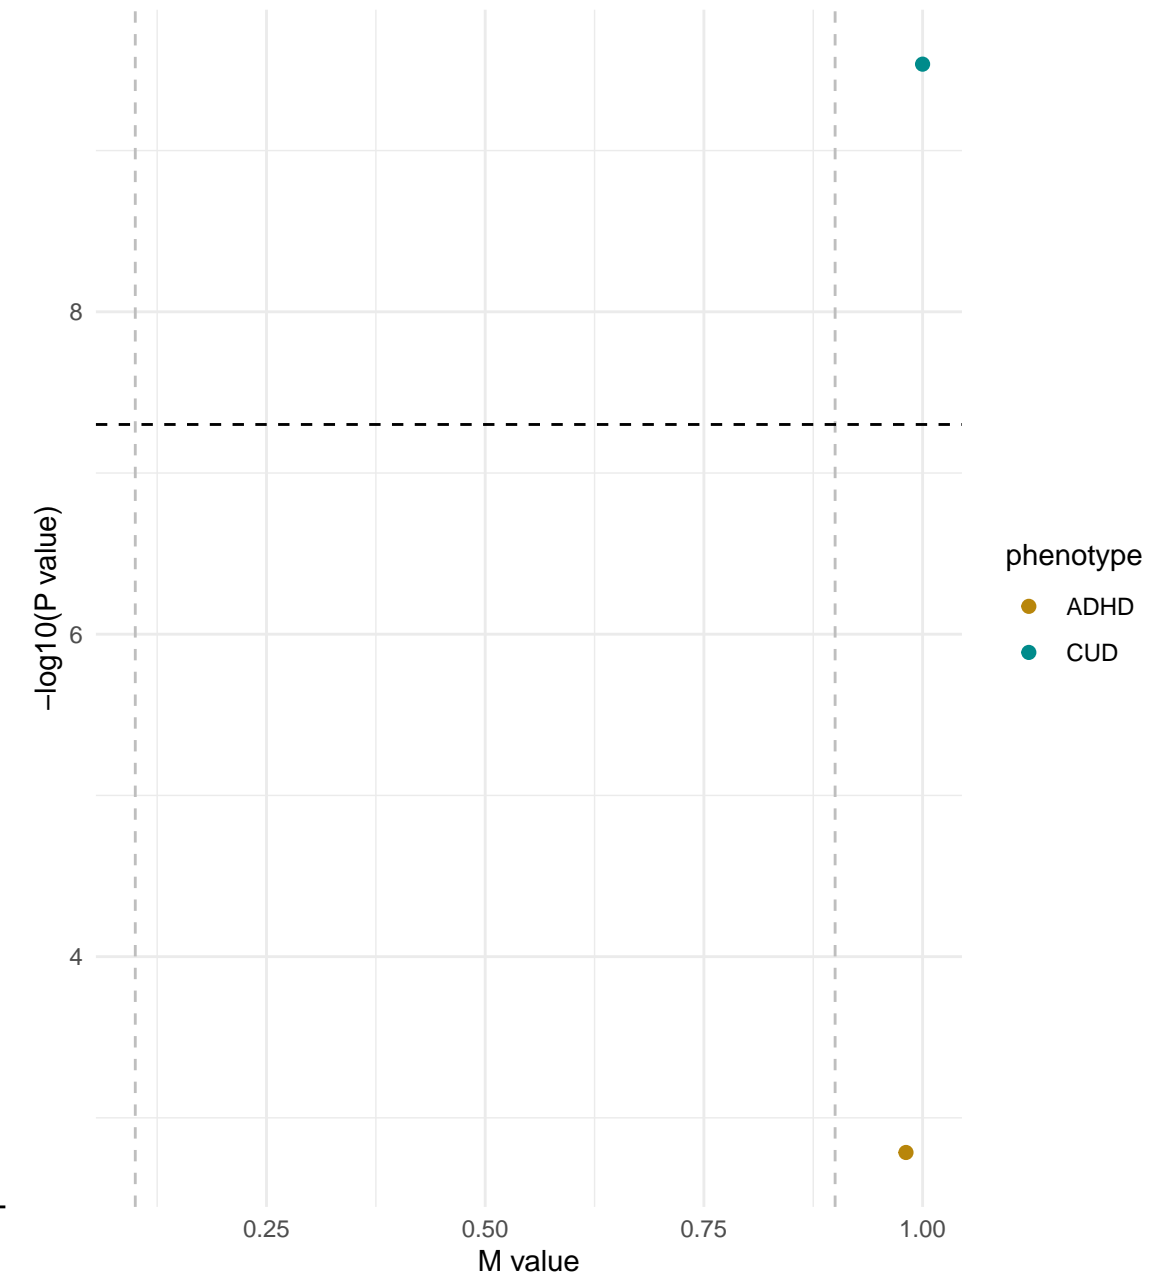

Lead SNP: rs10835372

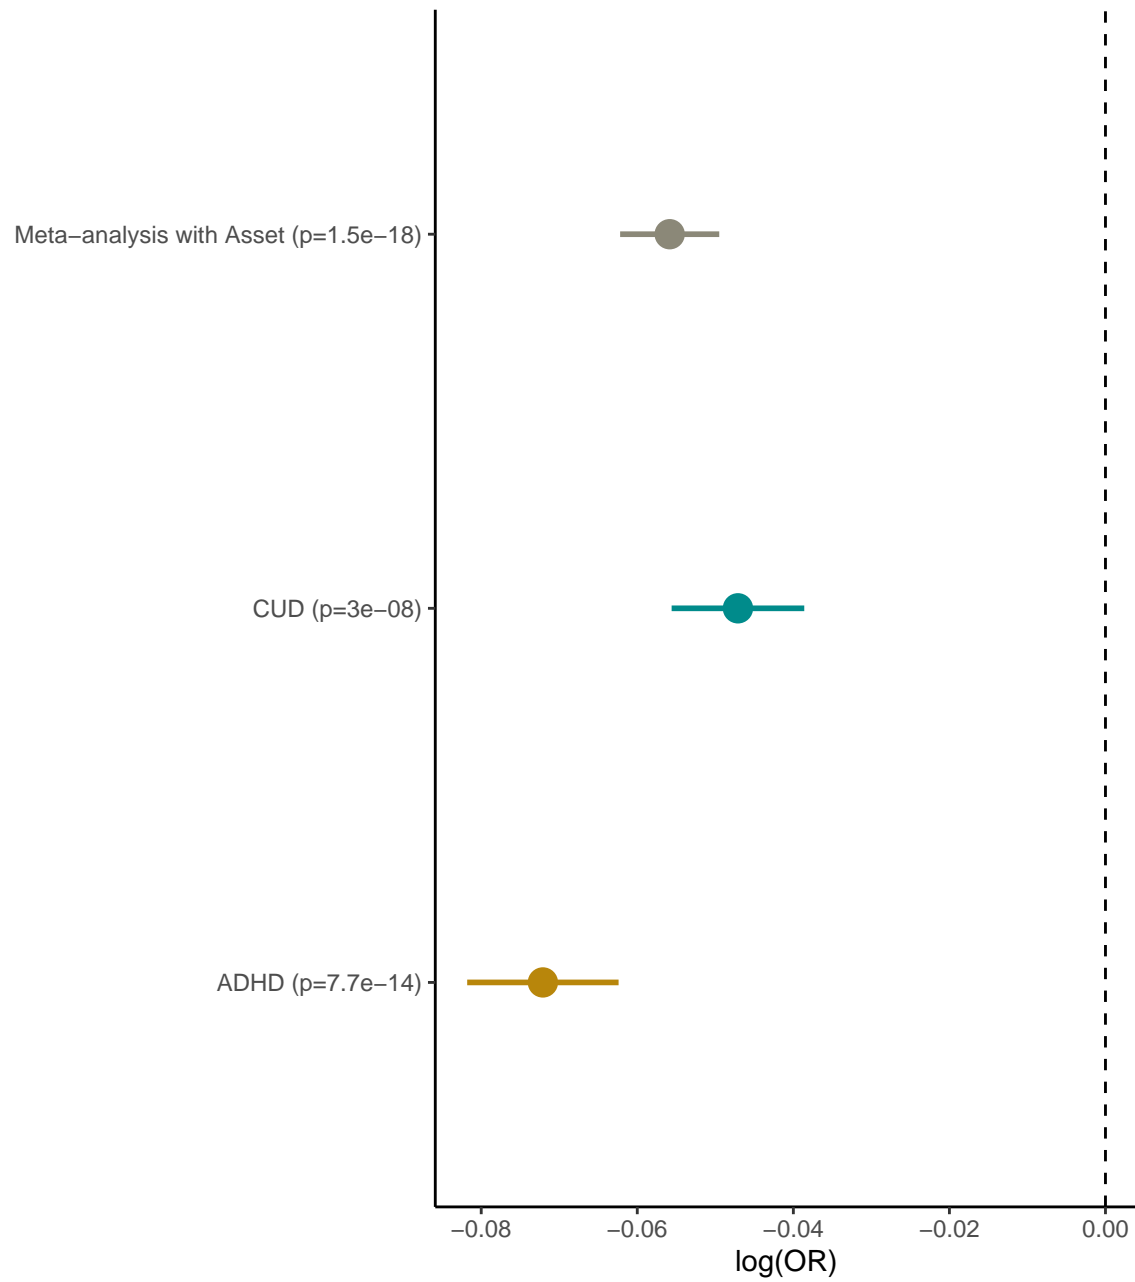

PM-Plot

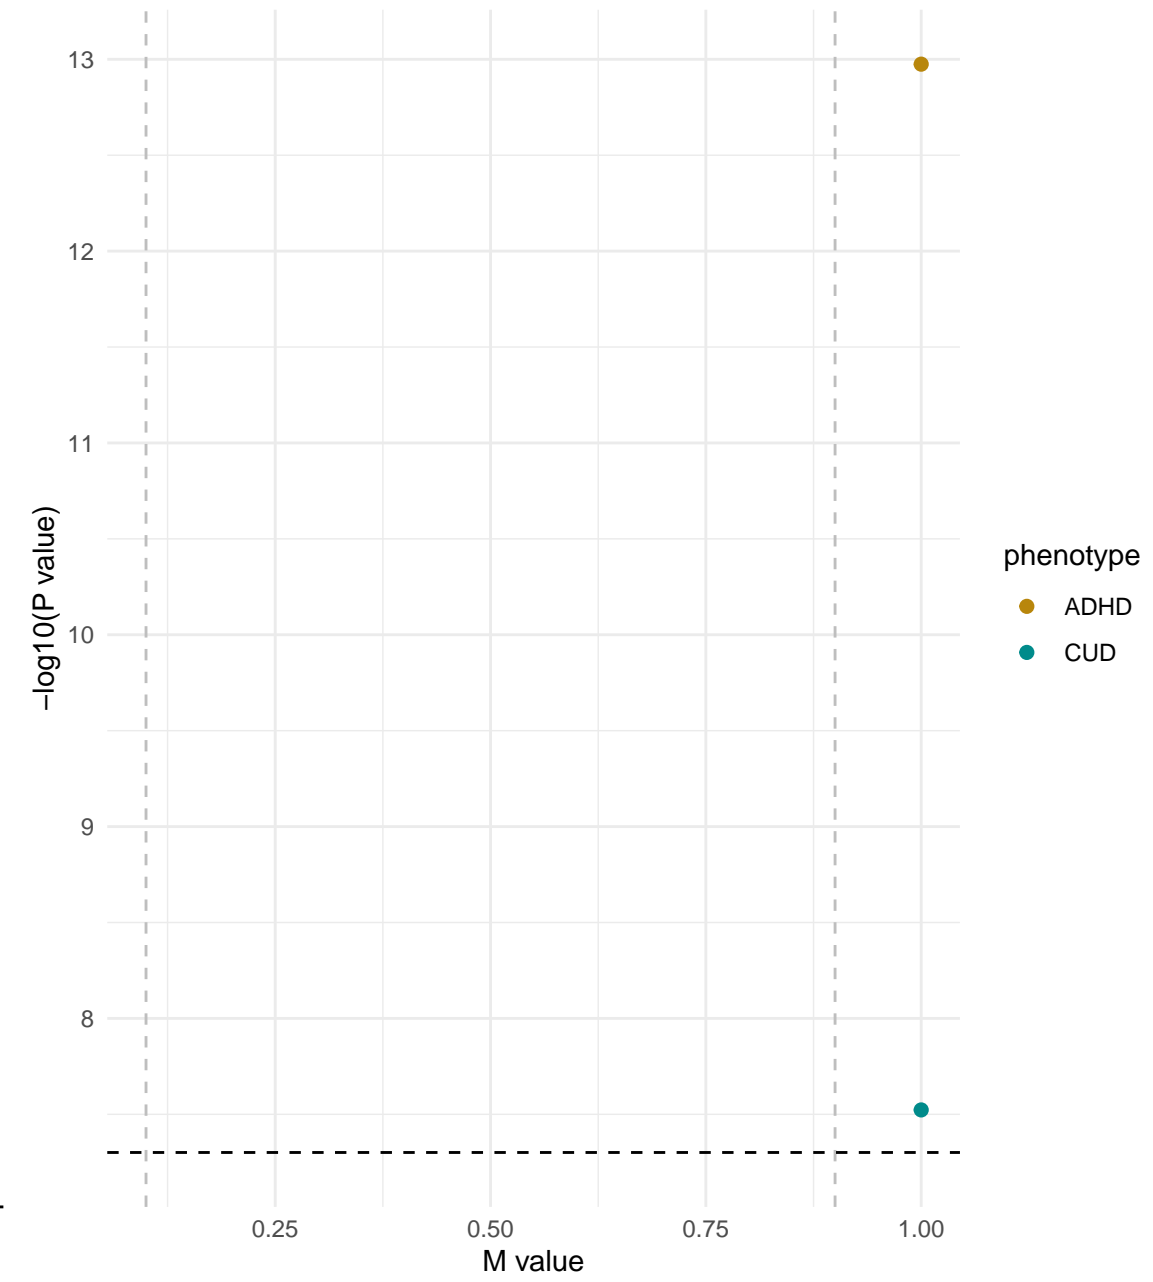

Lead SNP: rs11570190

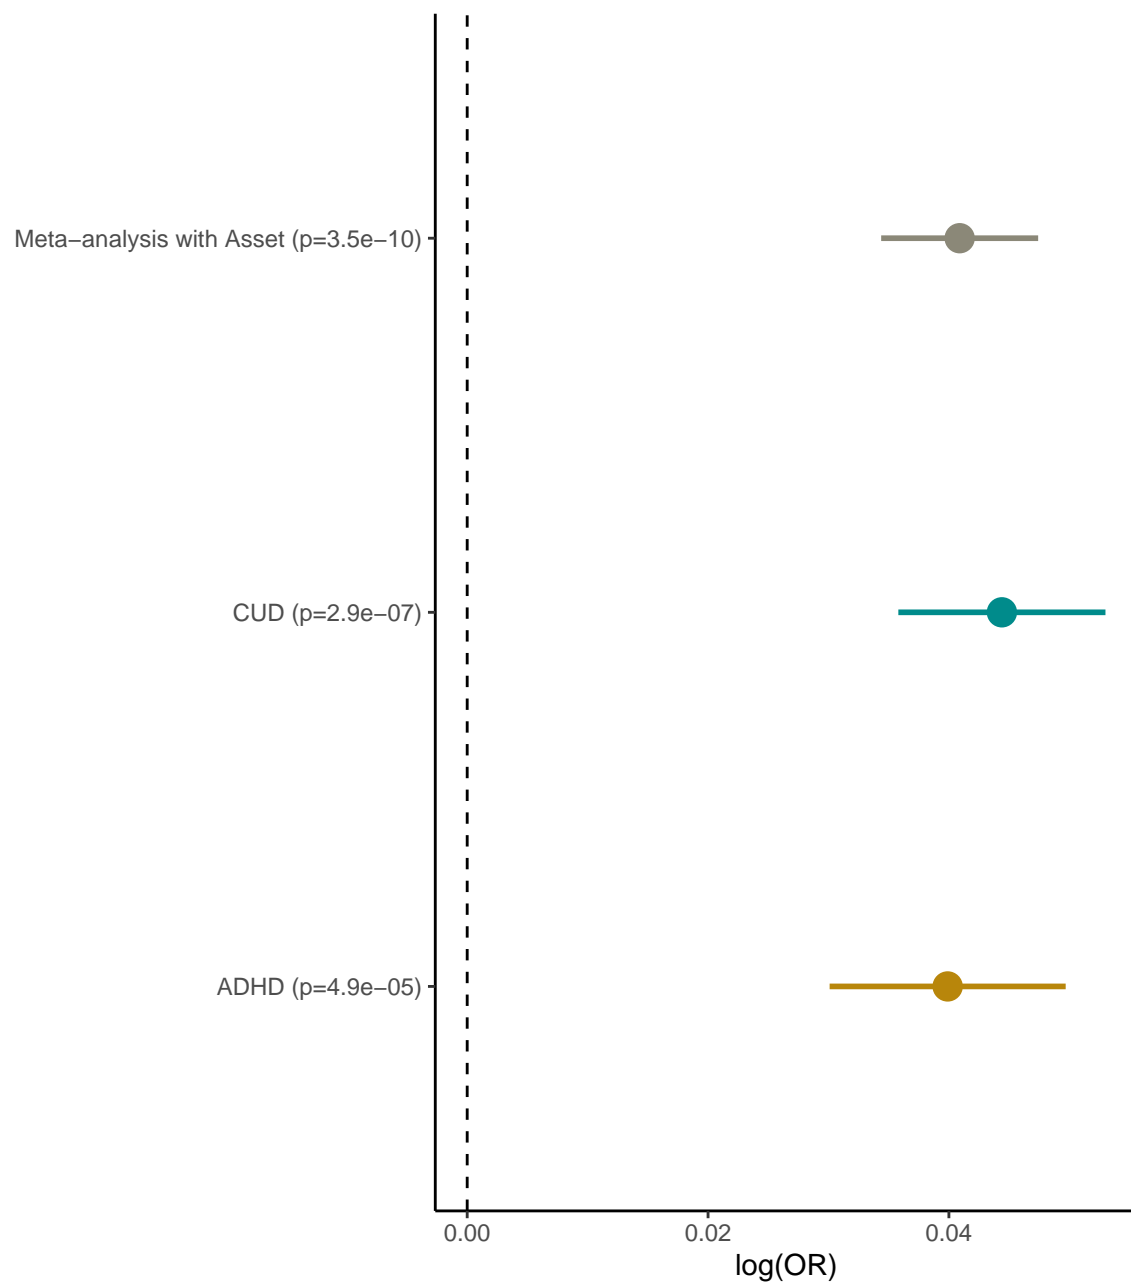

PM-Plot

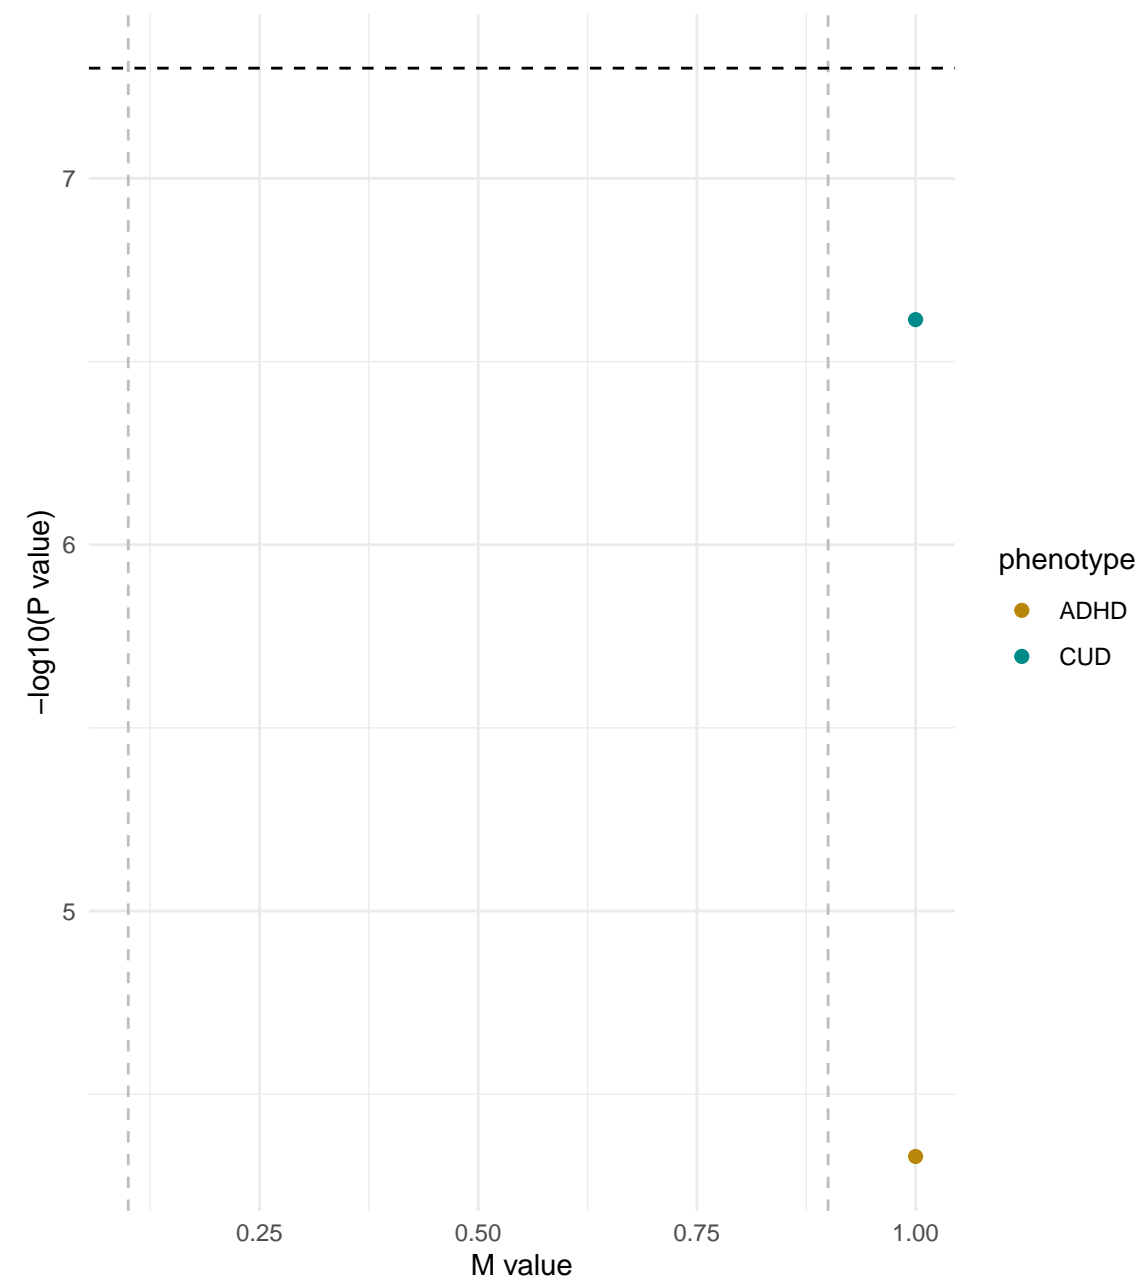

Lead SNP: rs11915747

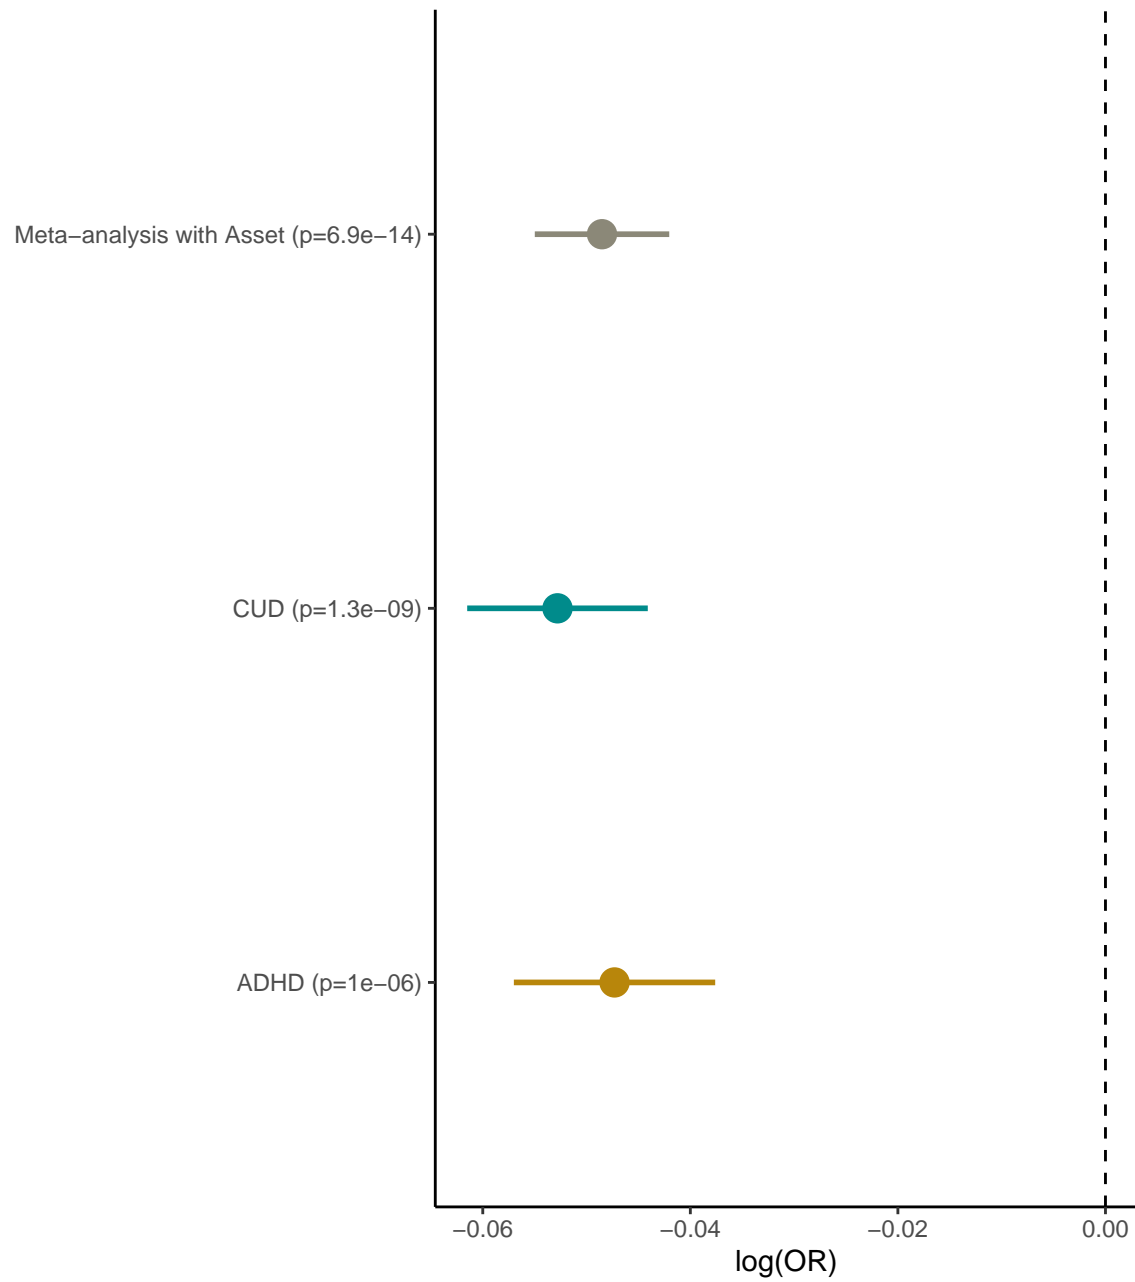

PM-Plot

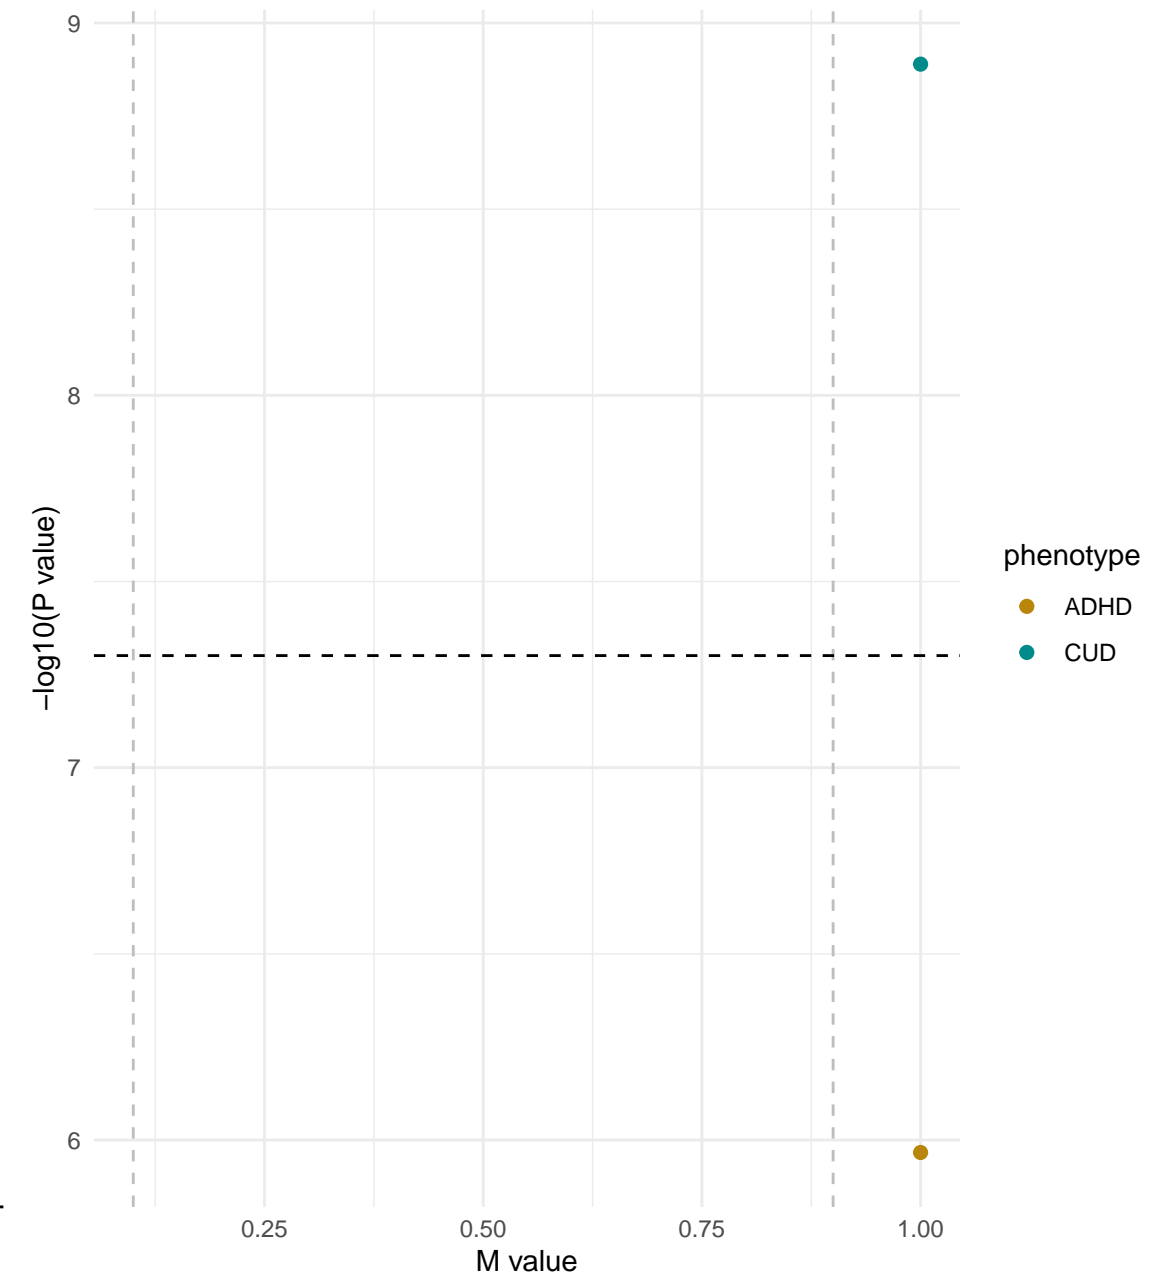

Lead SNP: rs12045626

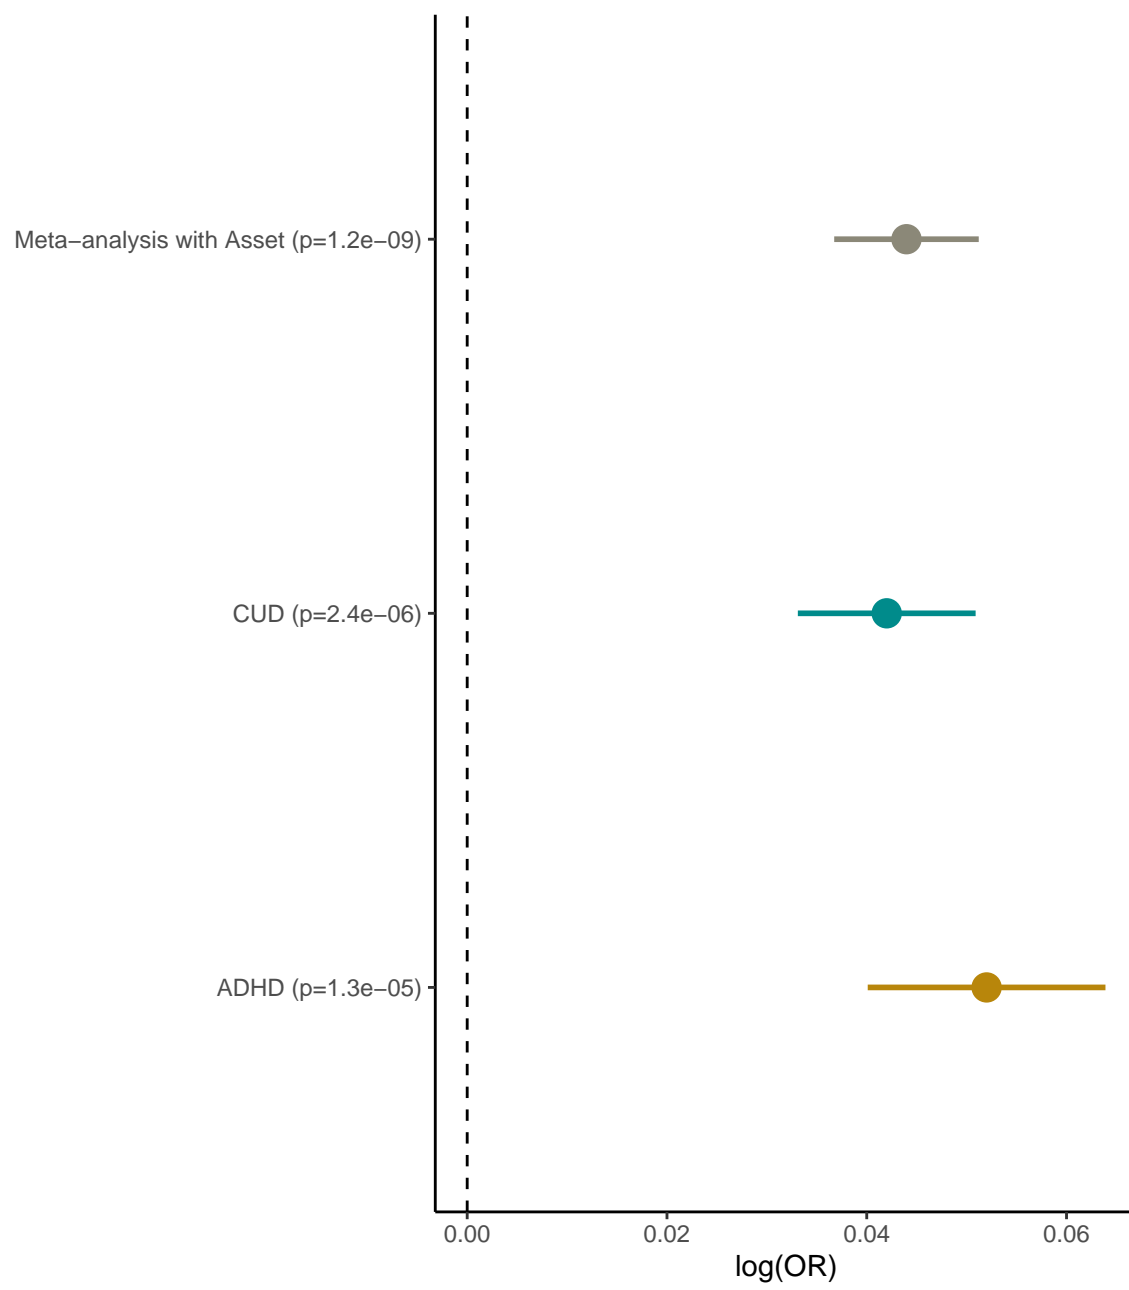

PM-Plot

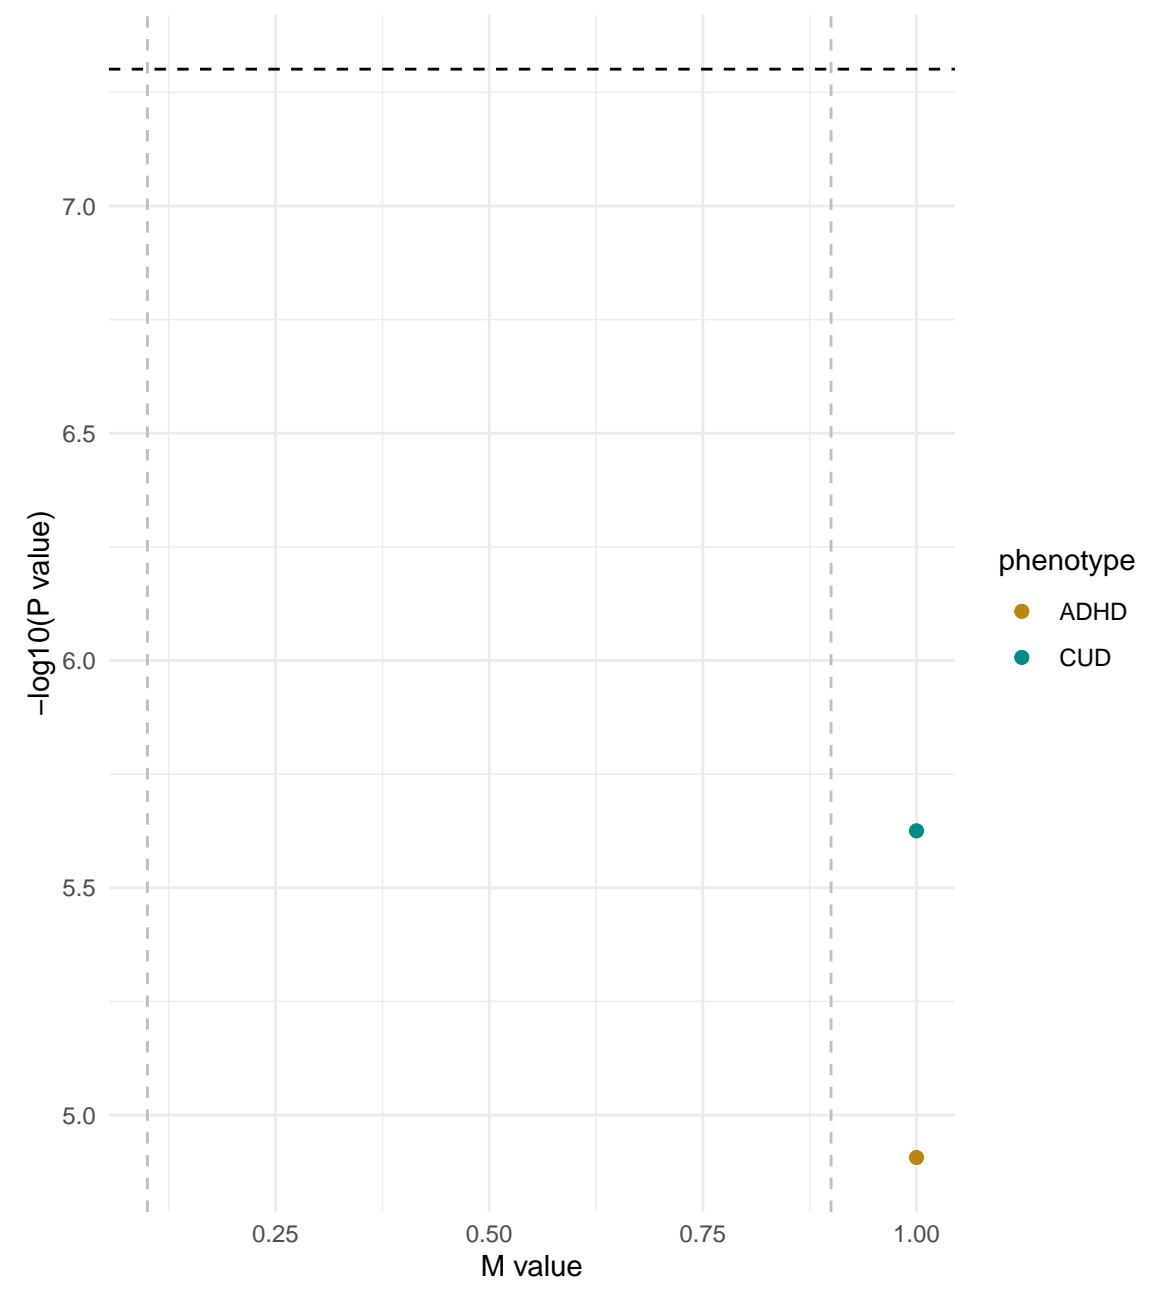



Lead SNP: rs17400325

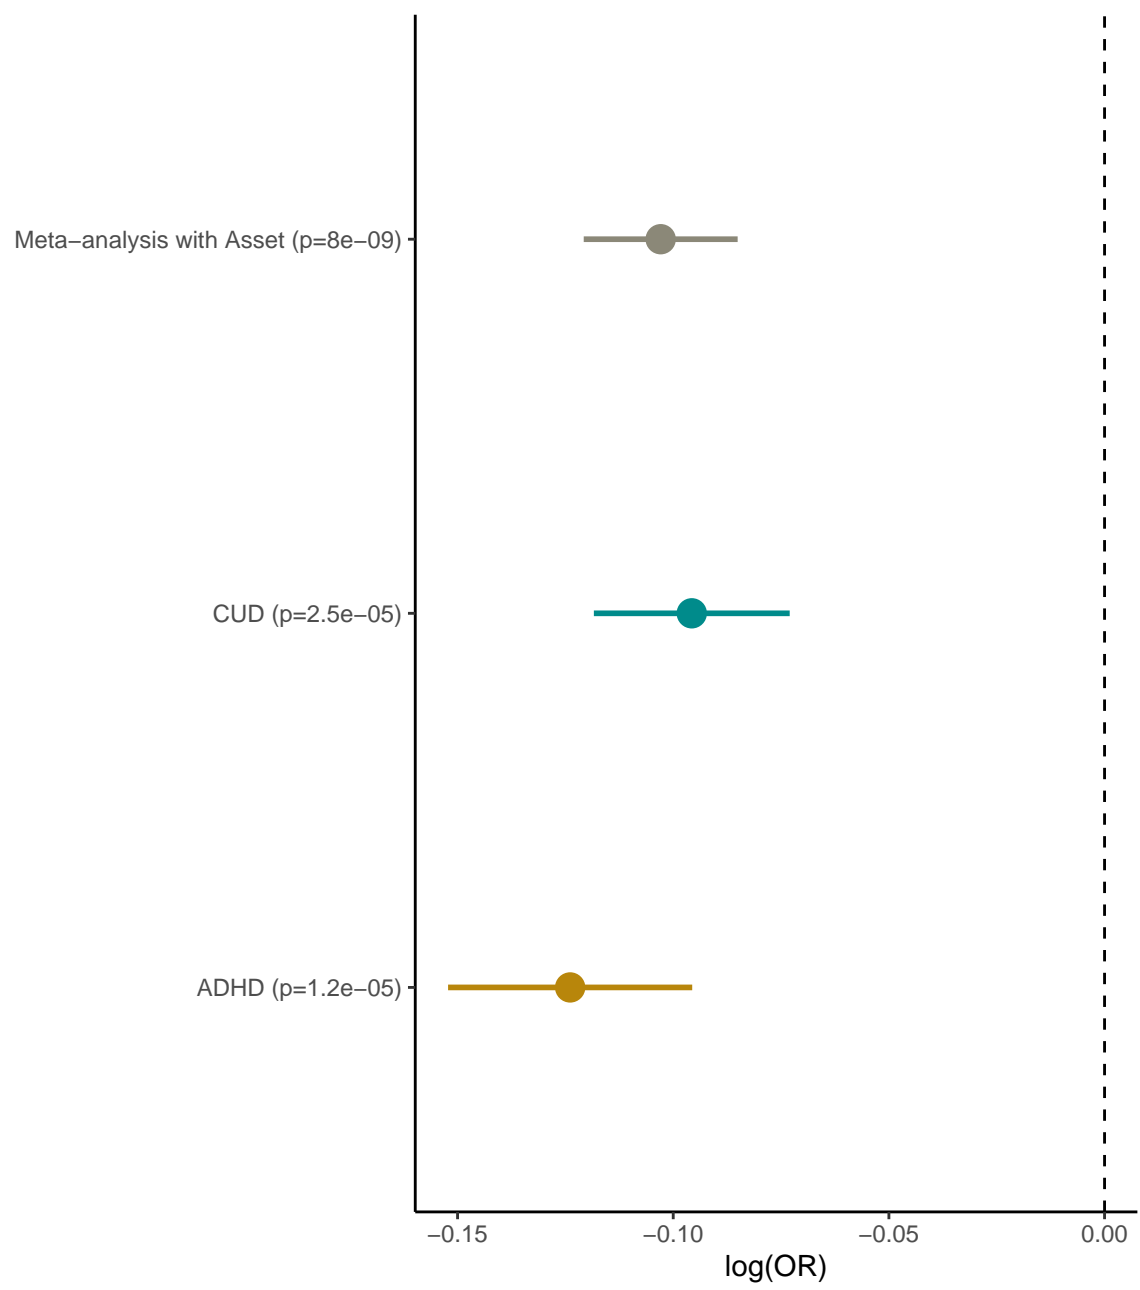

PM-Plot

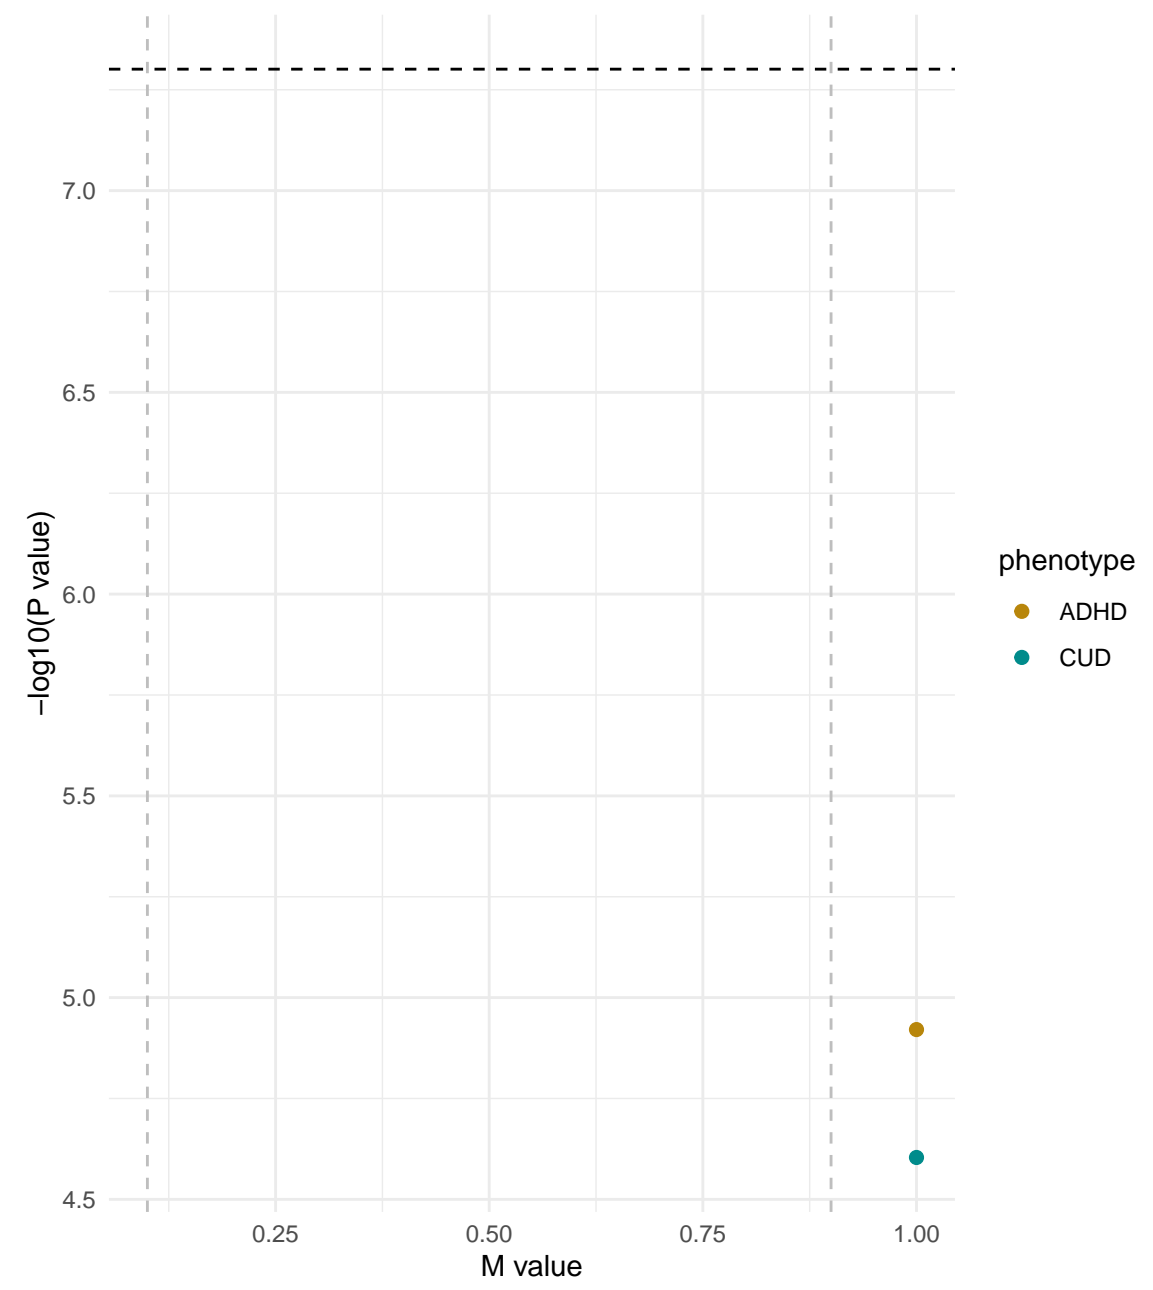

Lead SNP: rs17479393

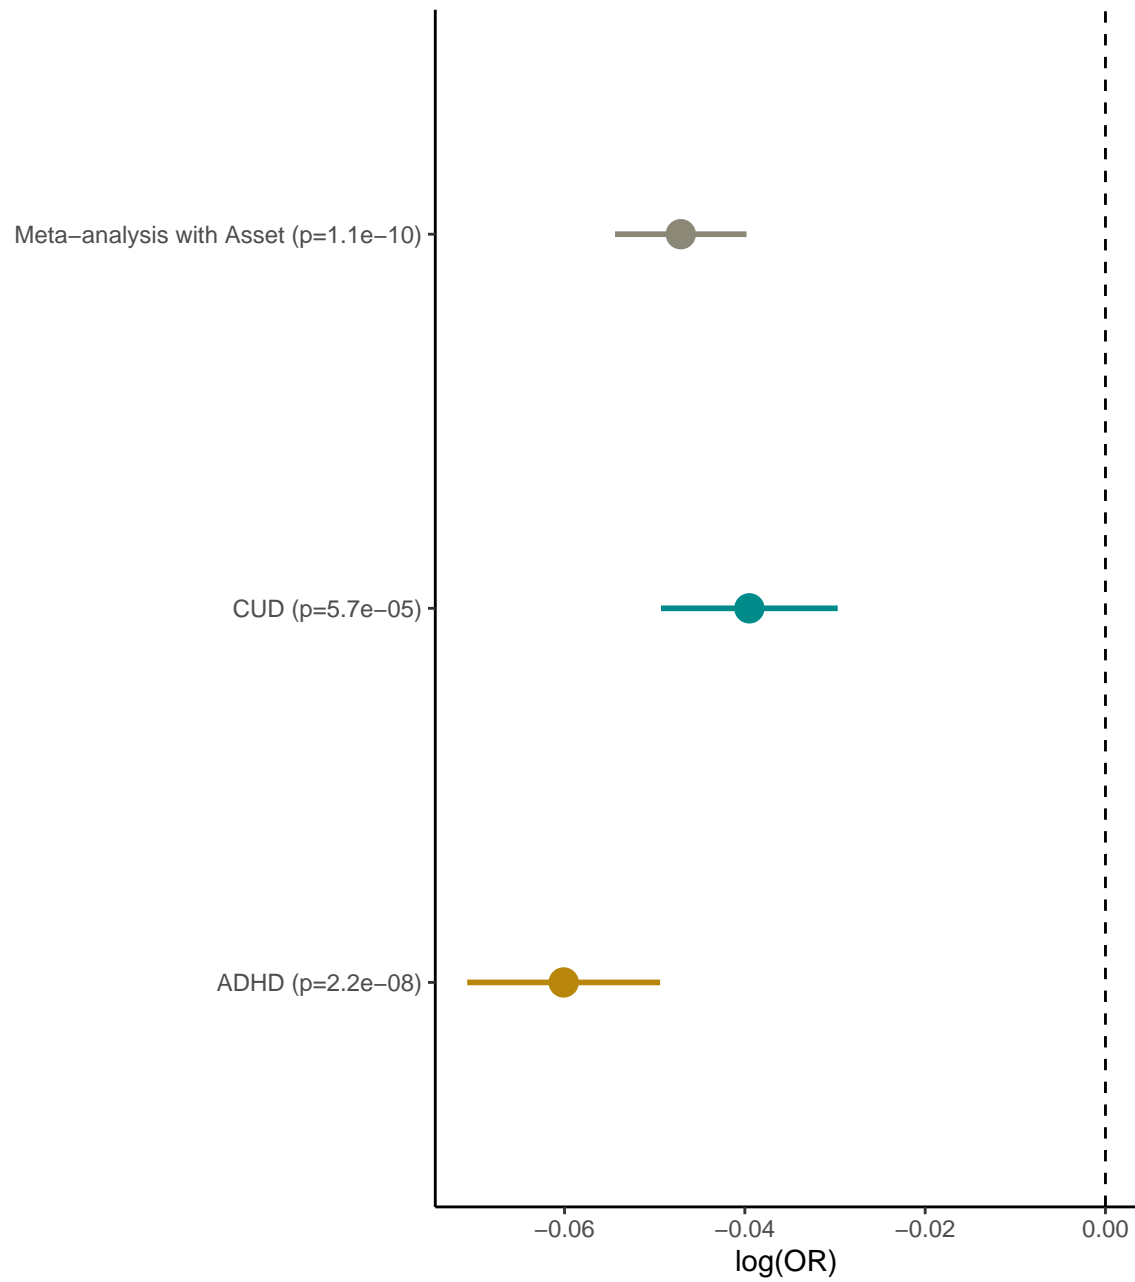

PM-Plot

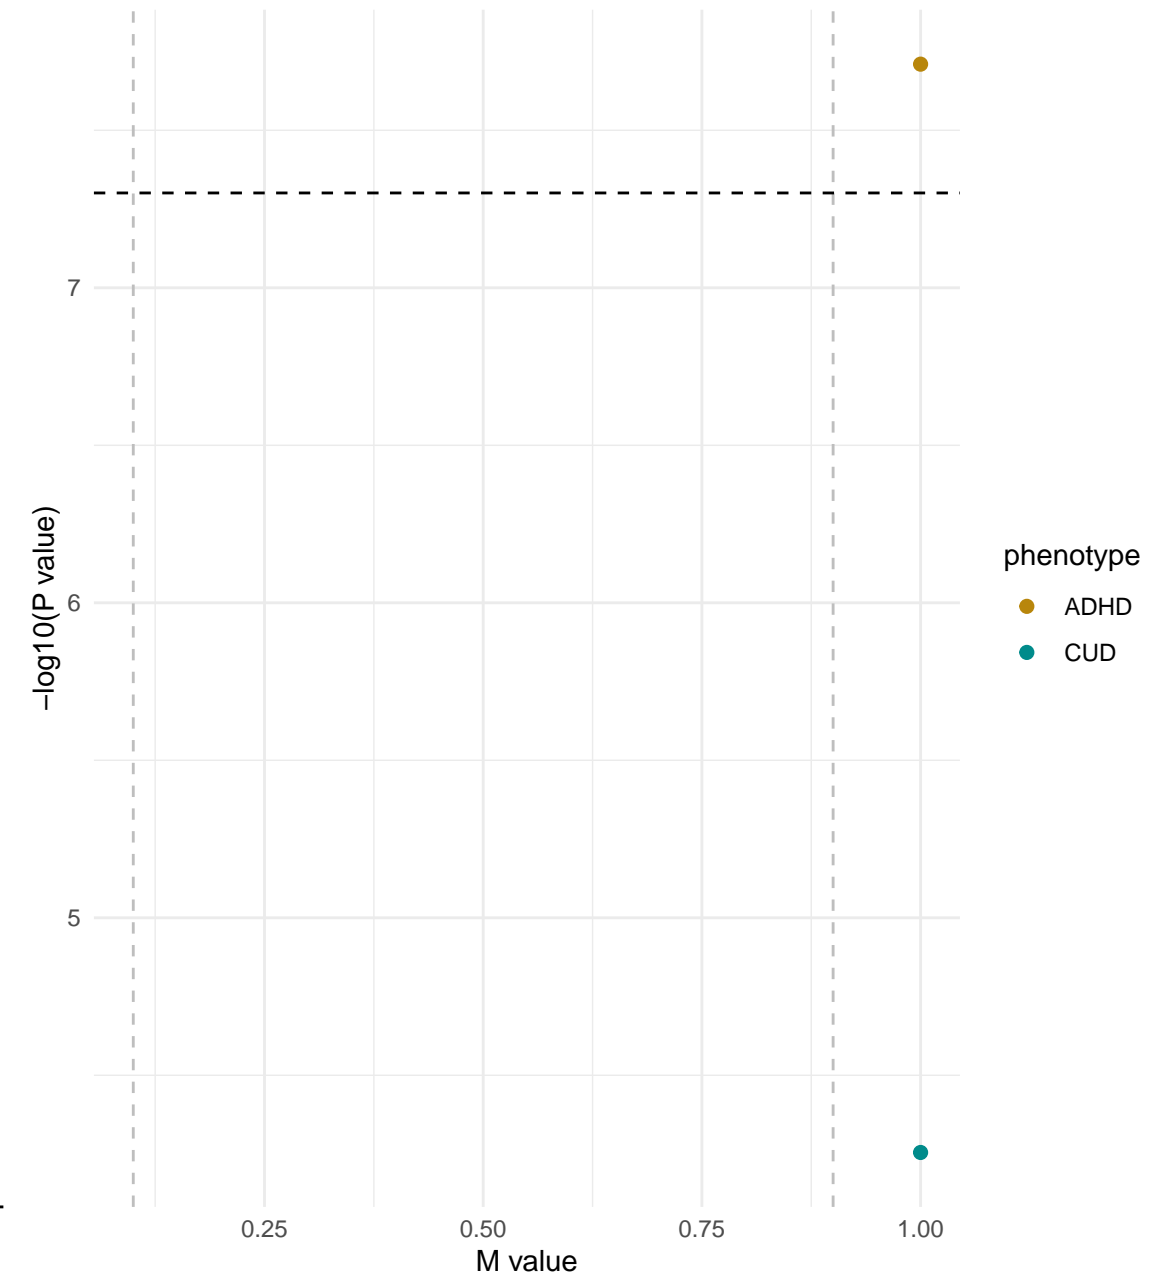

Lead SNP: rs17775184

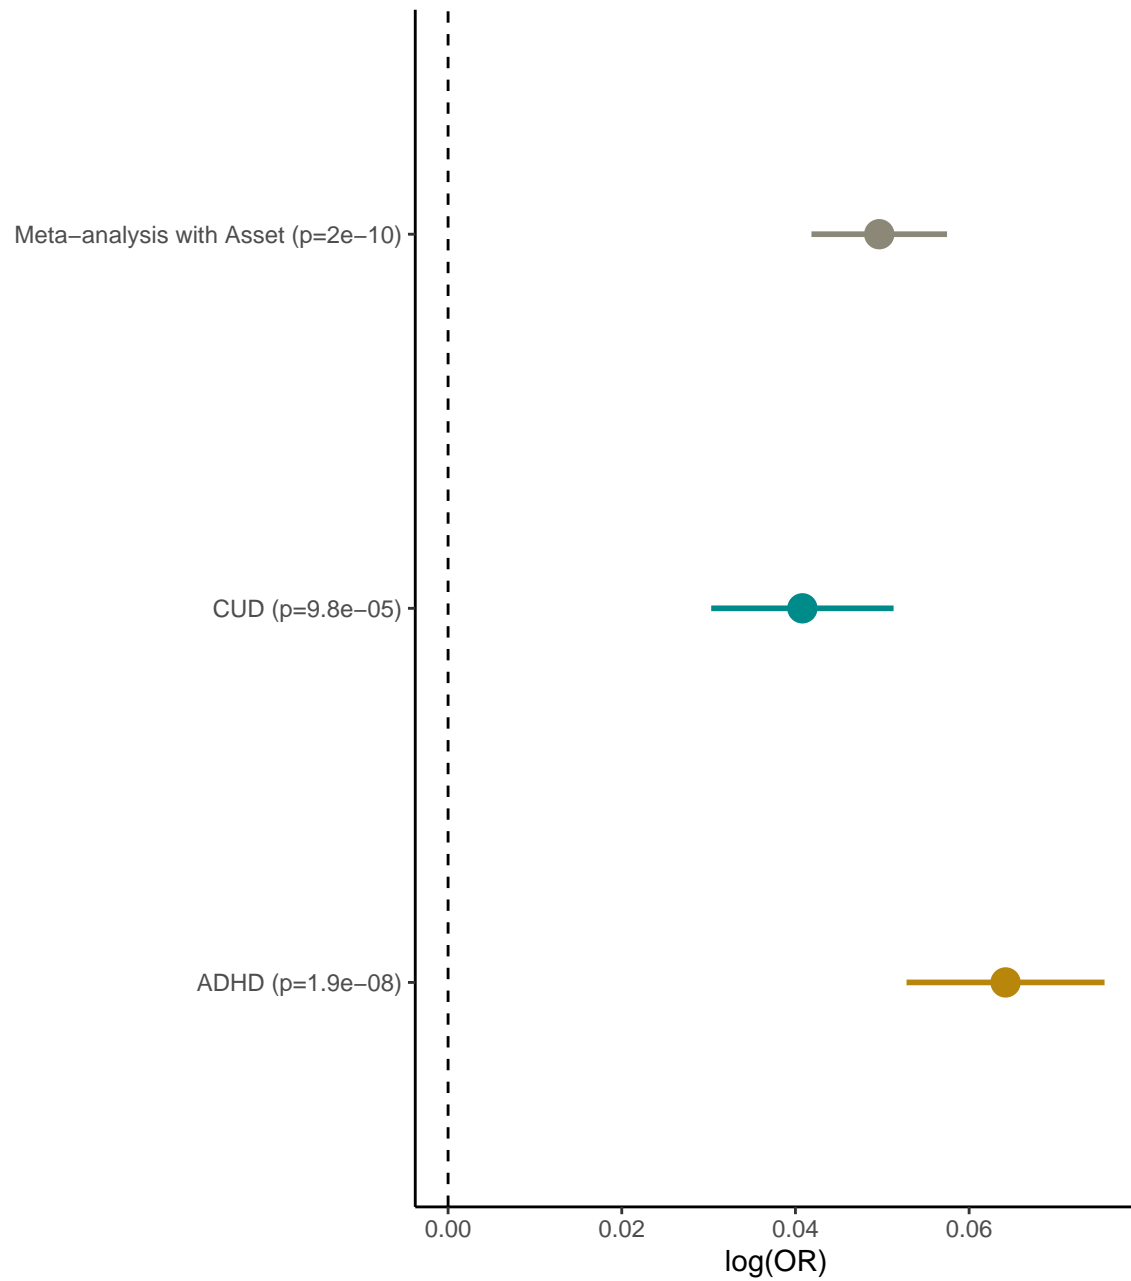

PM-Plot

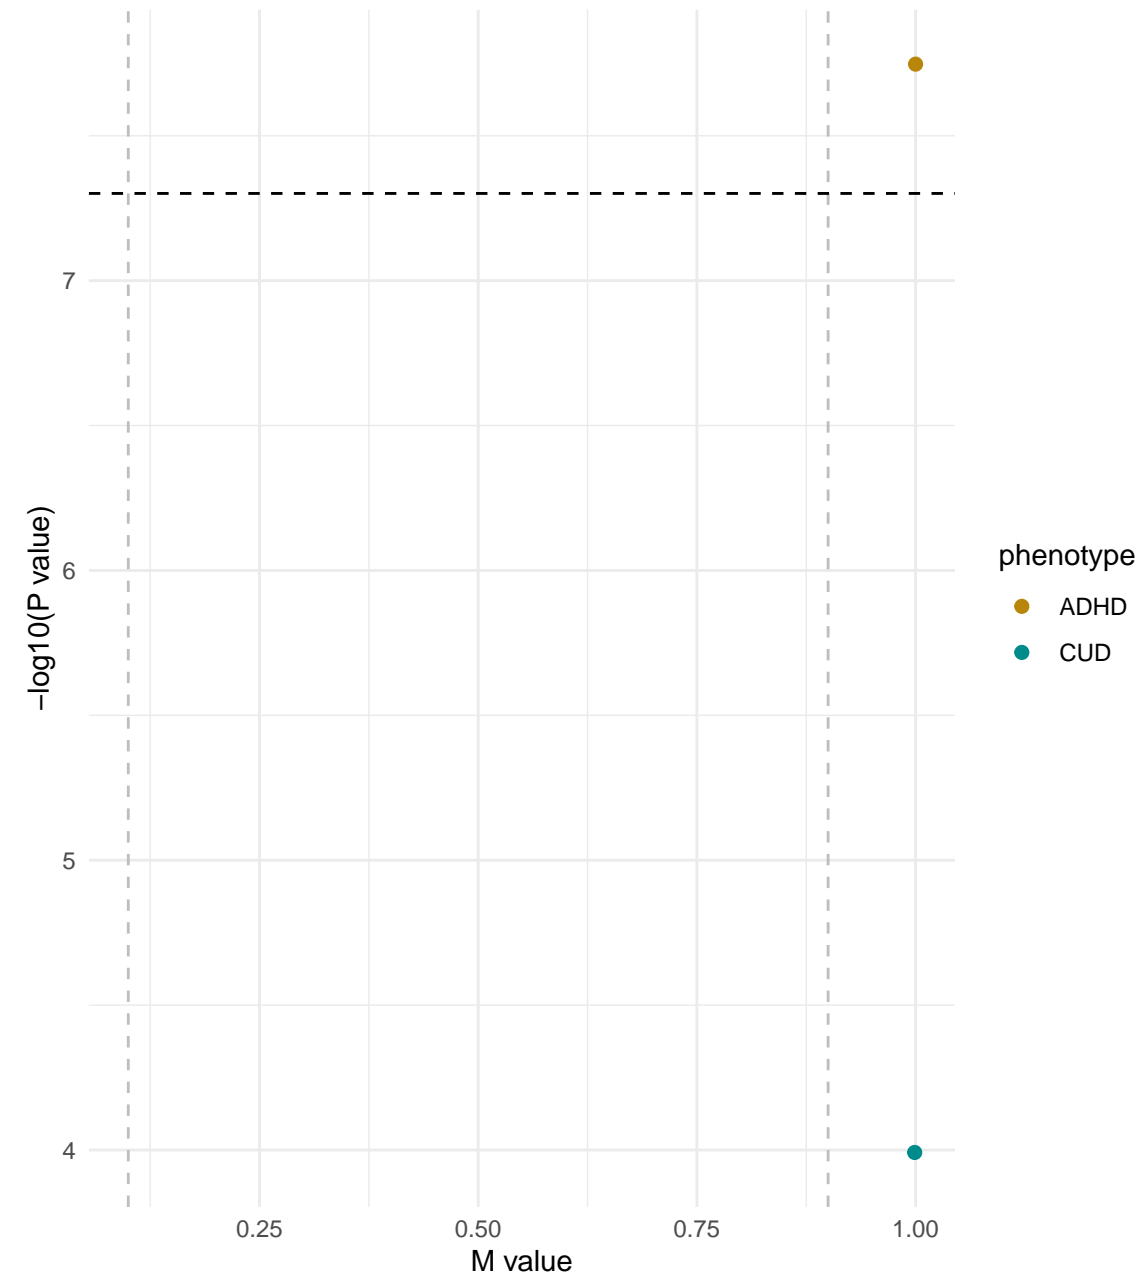

Lead SNP: rs34276912

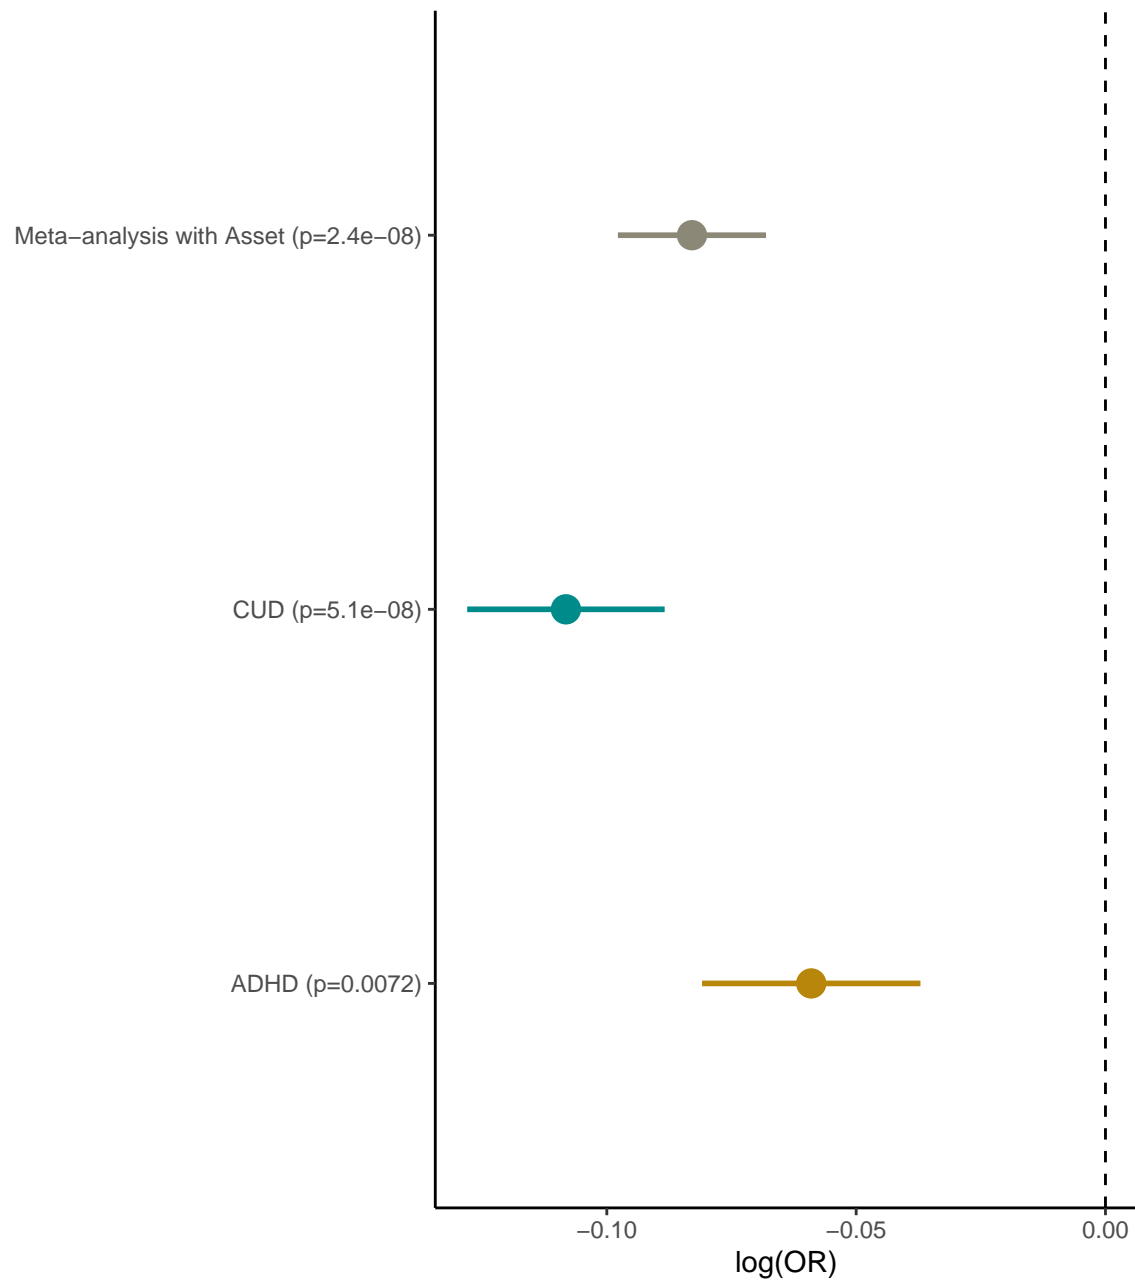

PM-Plot

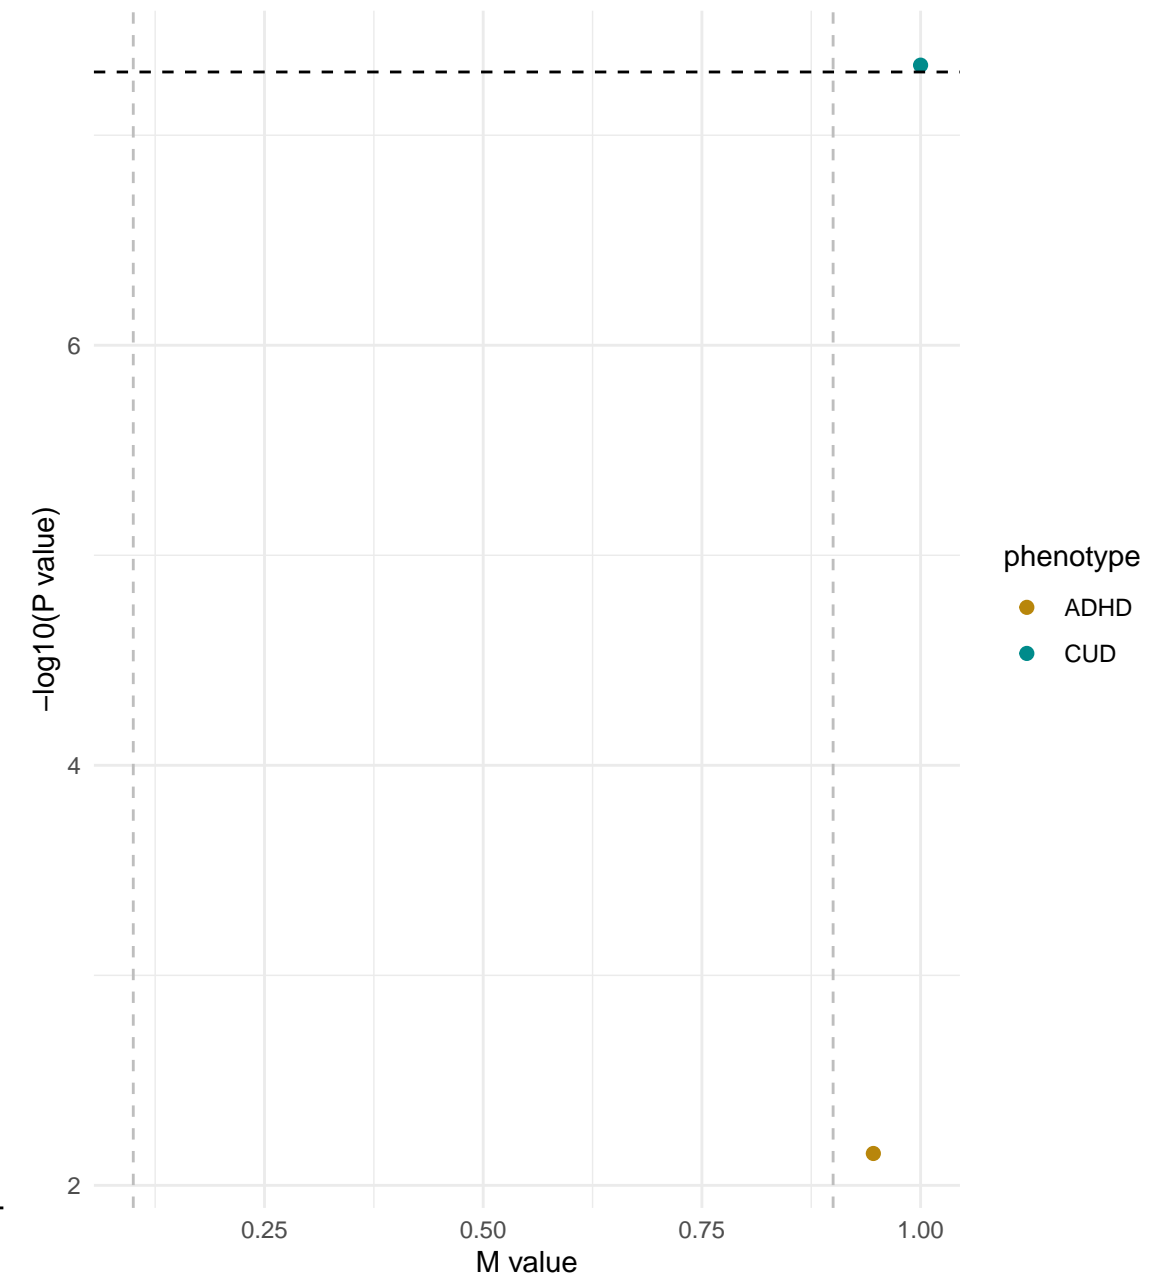

Lead SNP: rs35099490

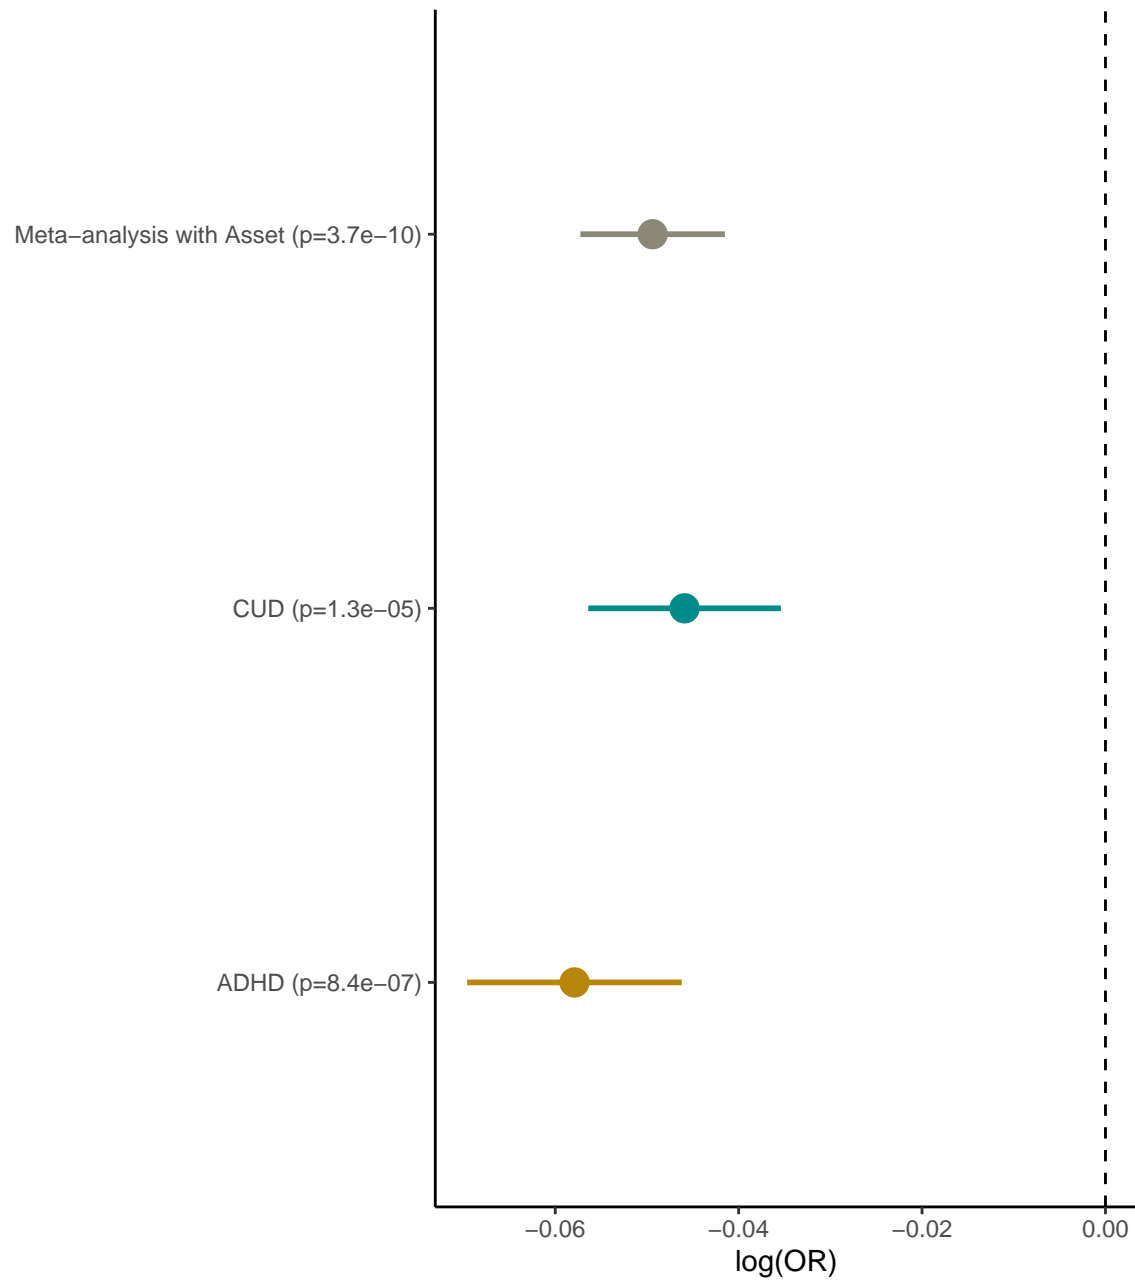

PM-Plot

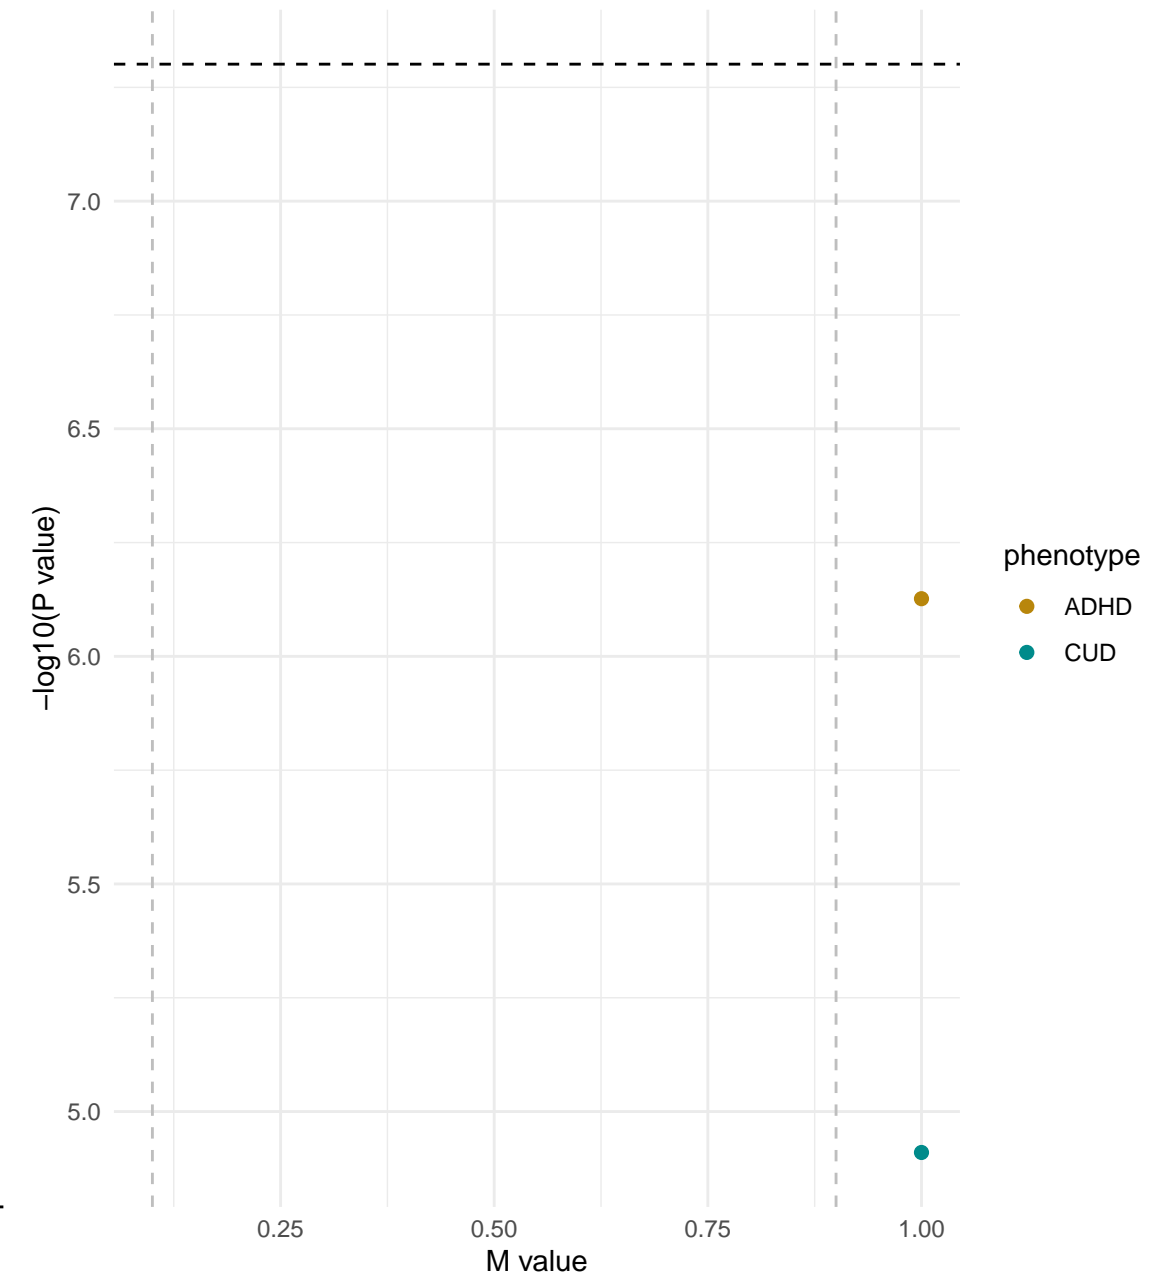

Lead SNP: rs56176327

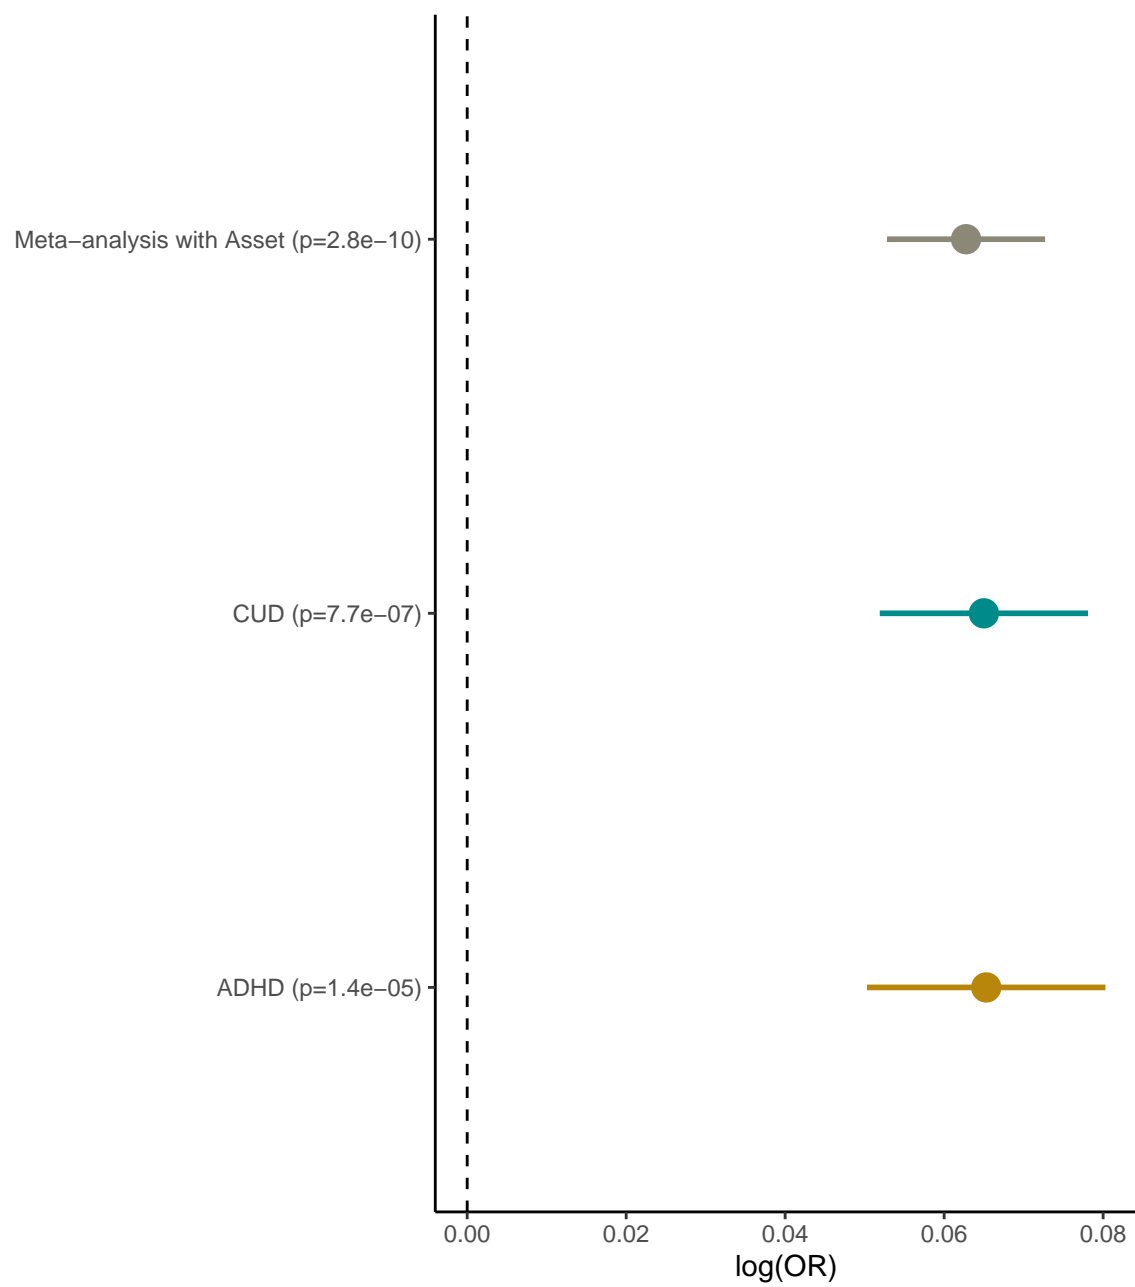

PM-Plot

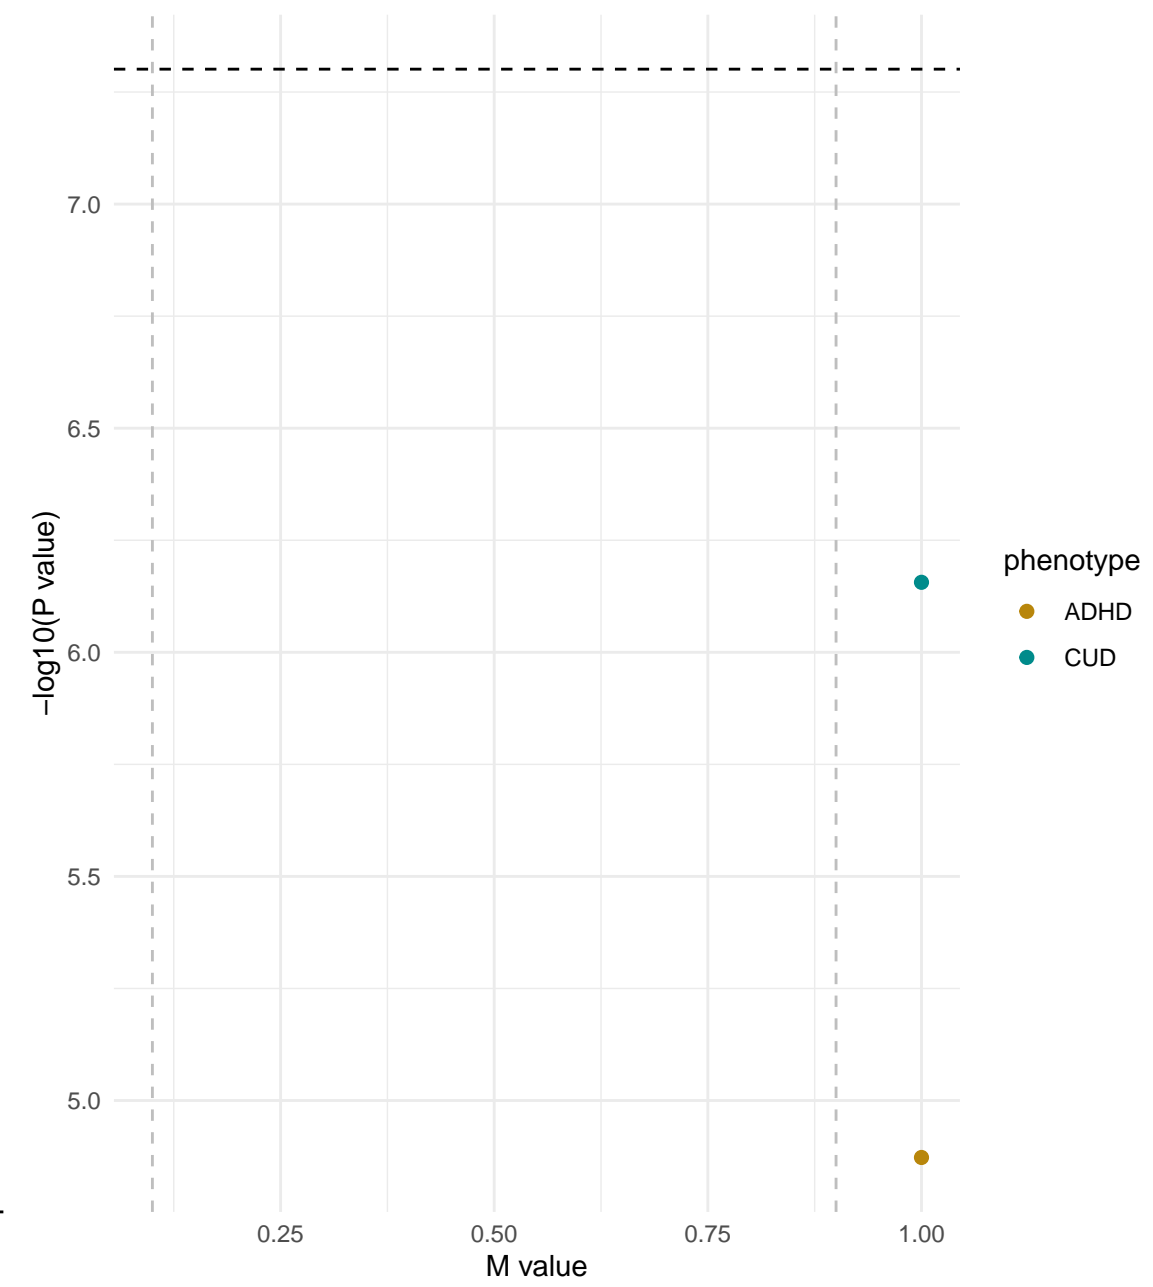

Lead SNP: rs62261465

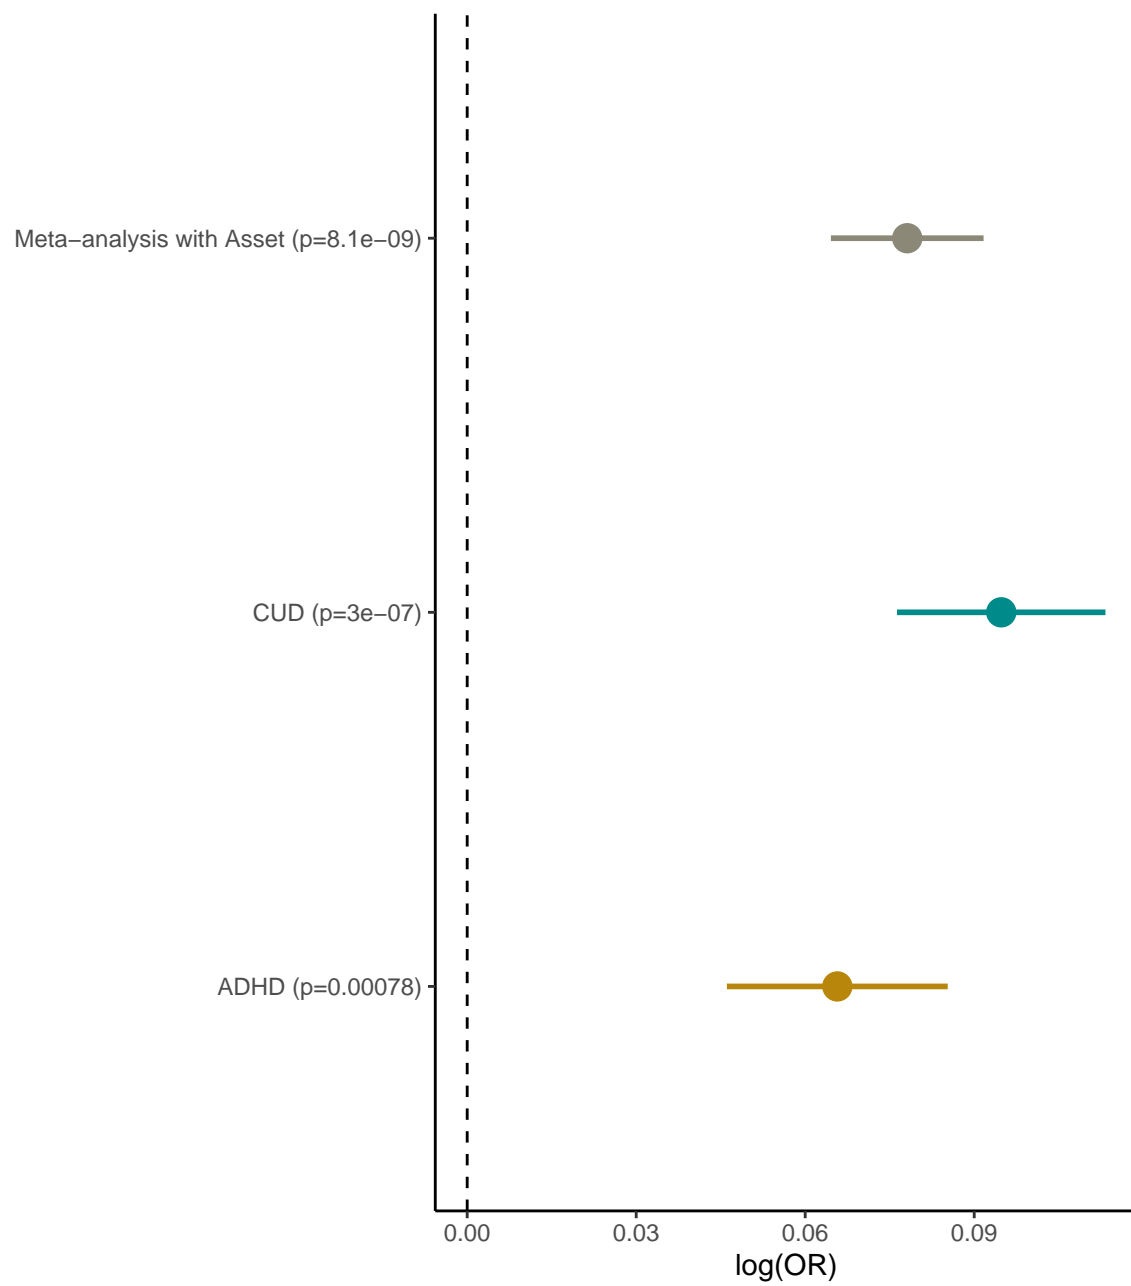

PM-Plot

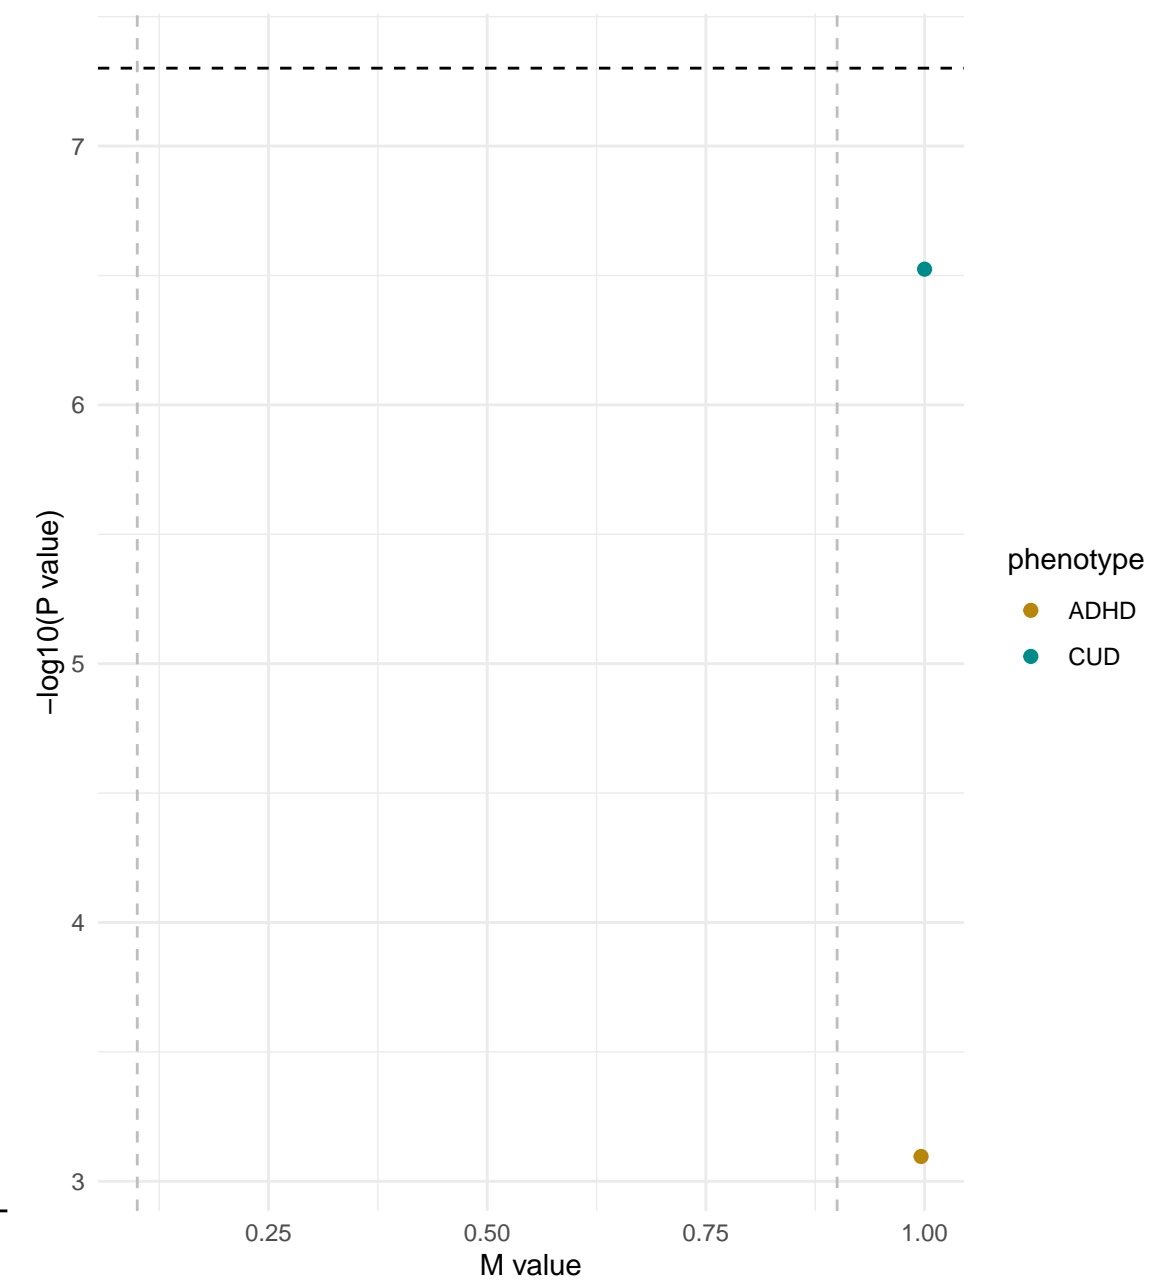

Lead SNP: rs72678864

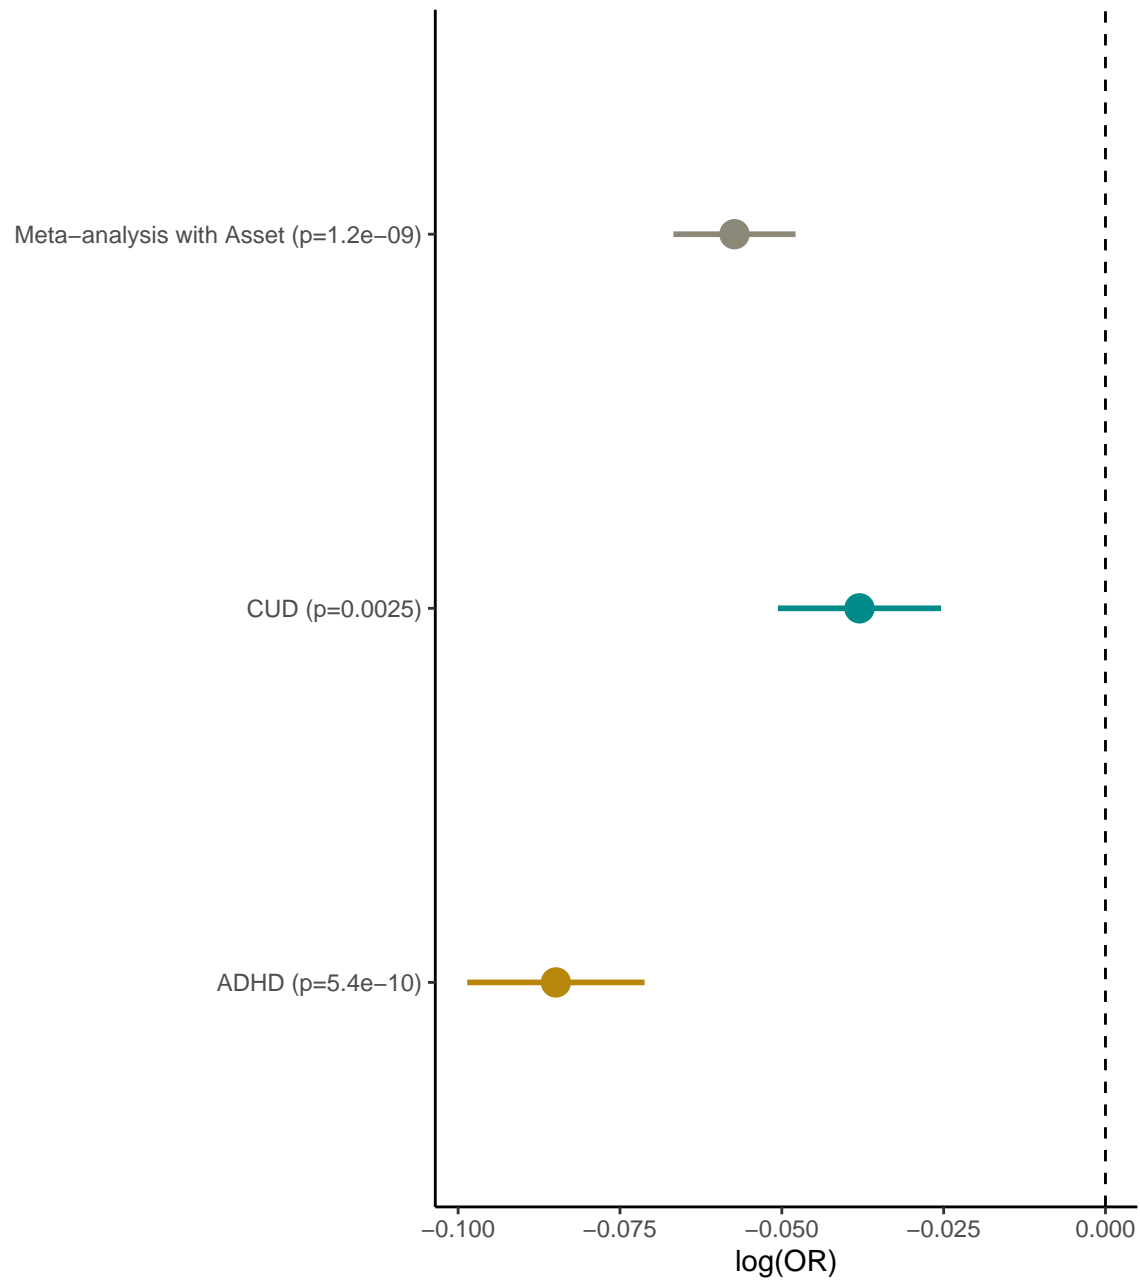

PM-Plot

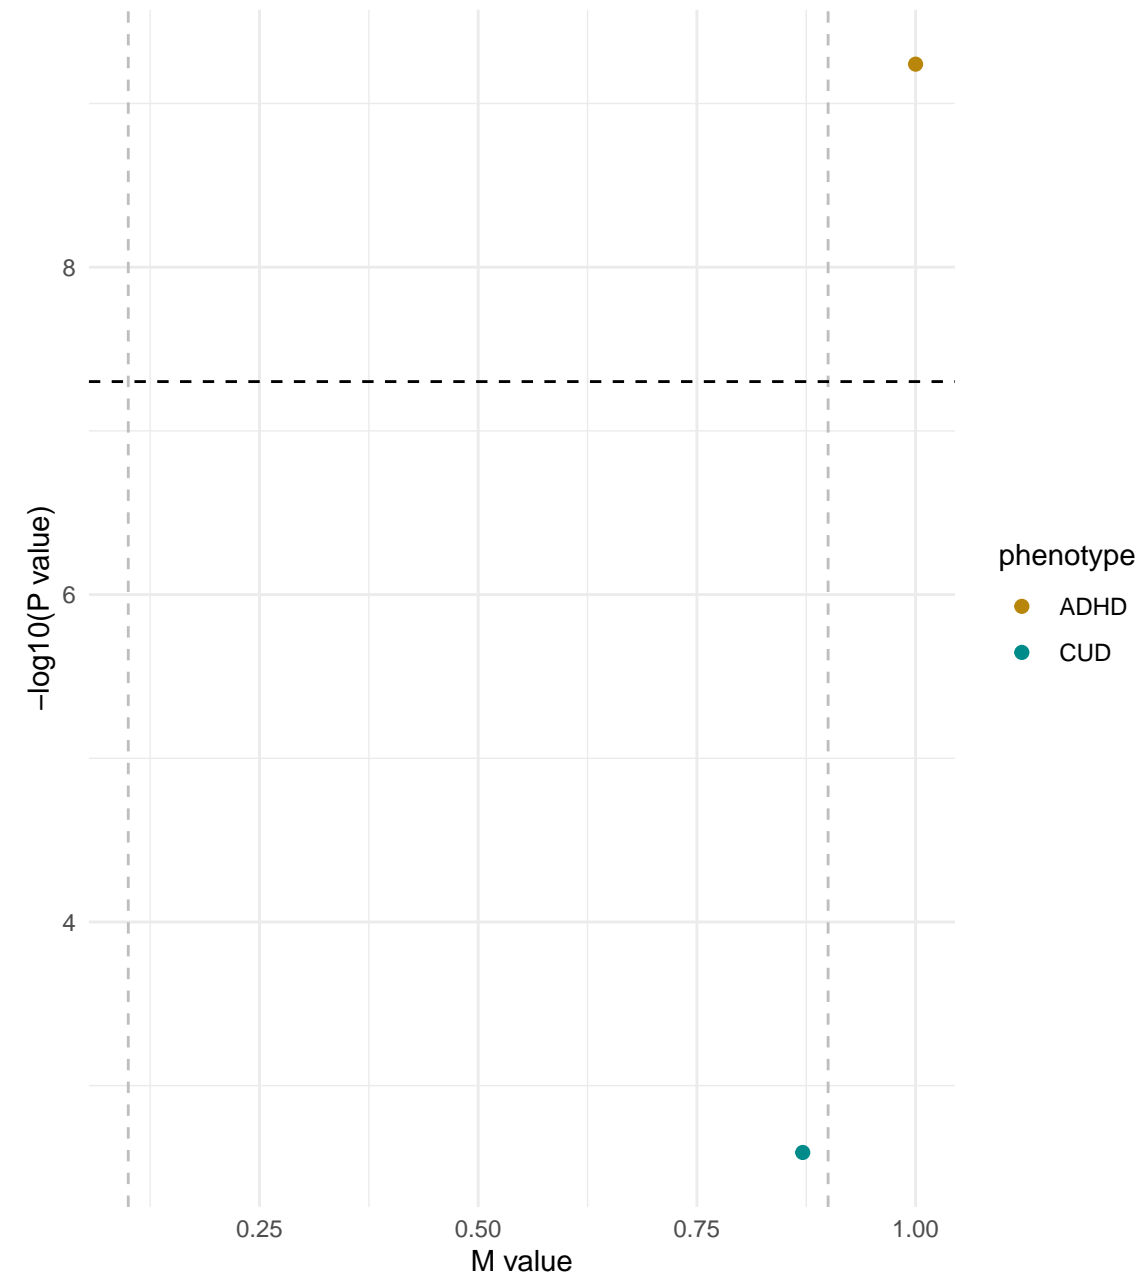



Lead SNP: rs72763605

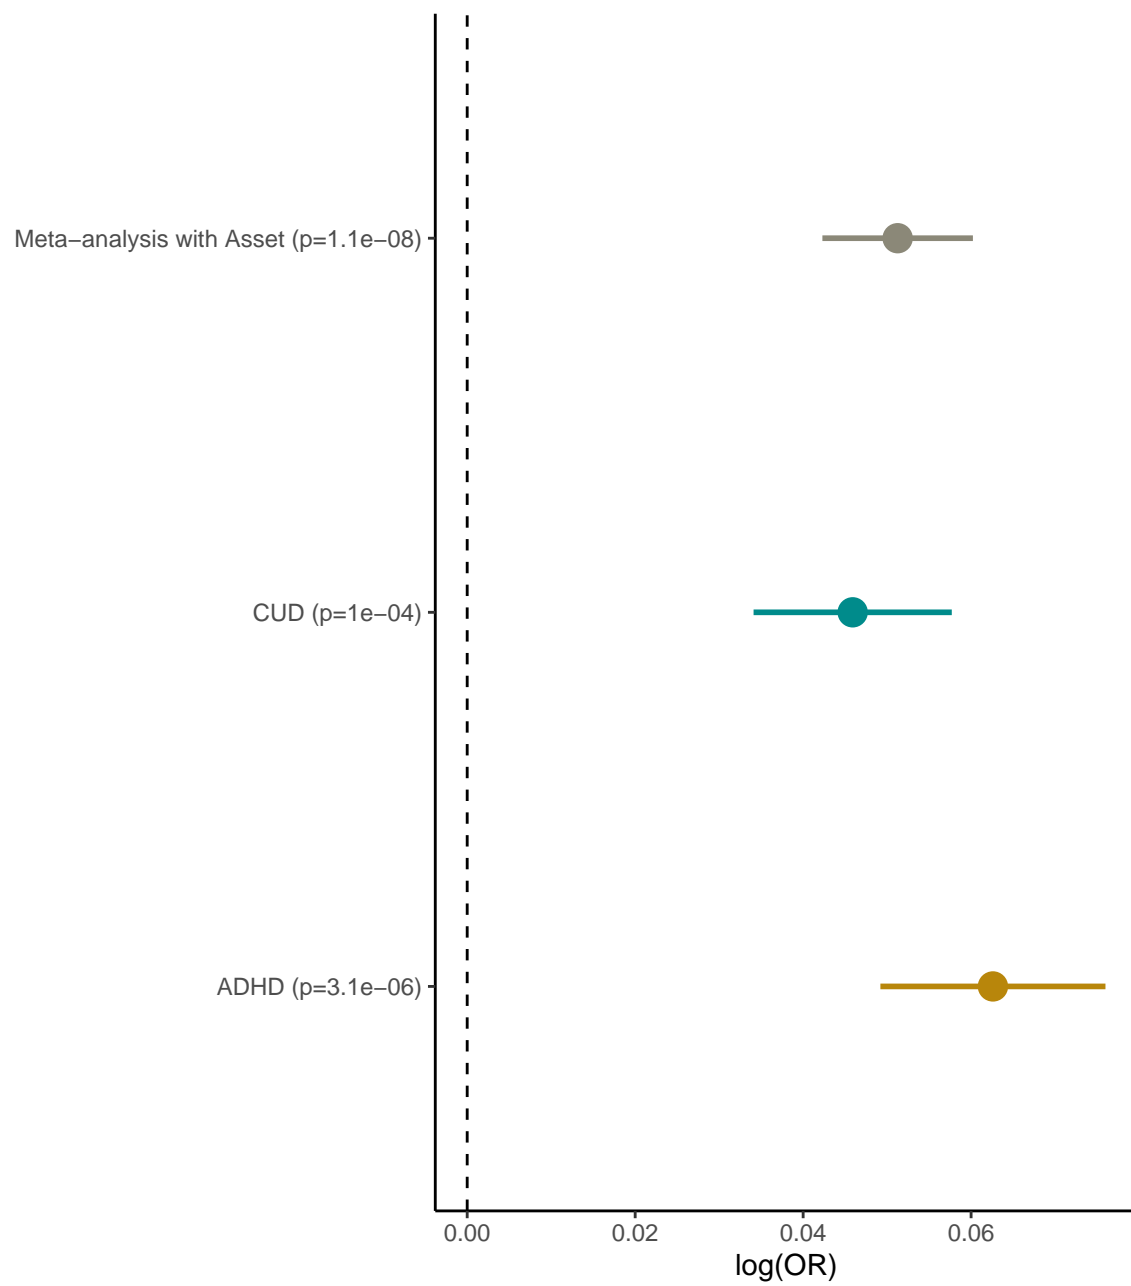

PM-Plot

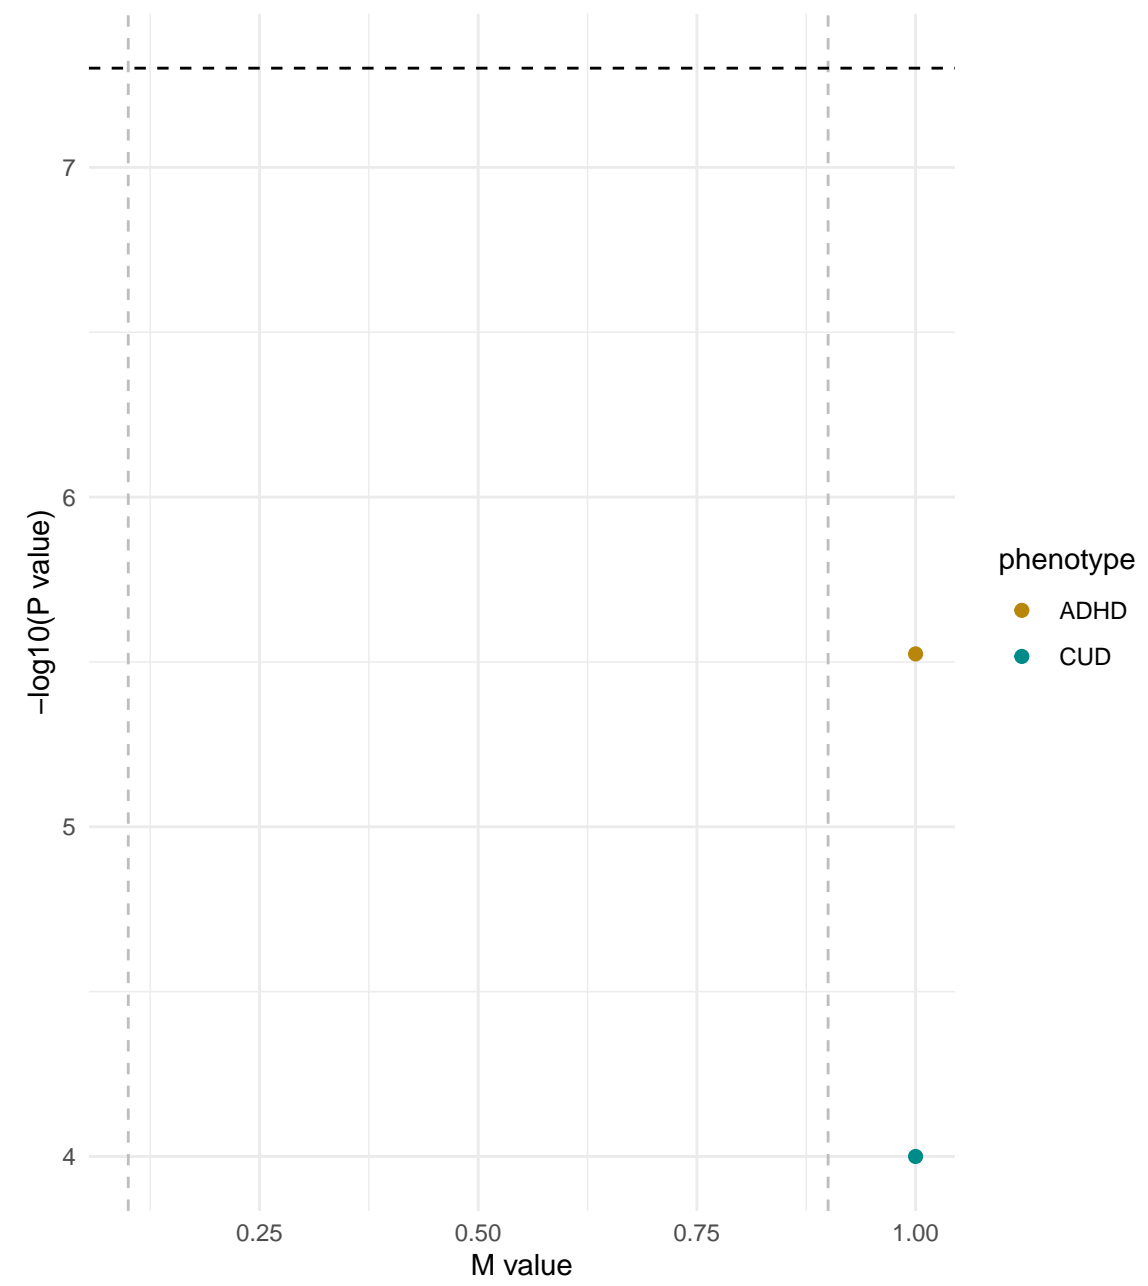

Lead SNP: rs73073007

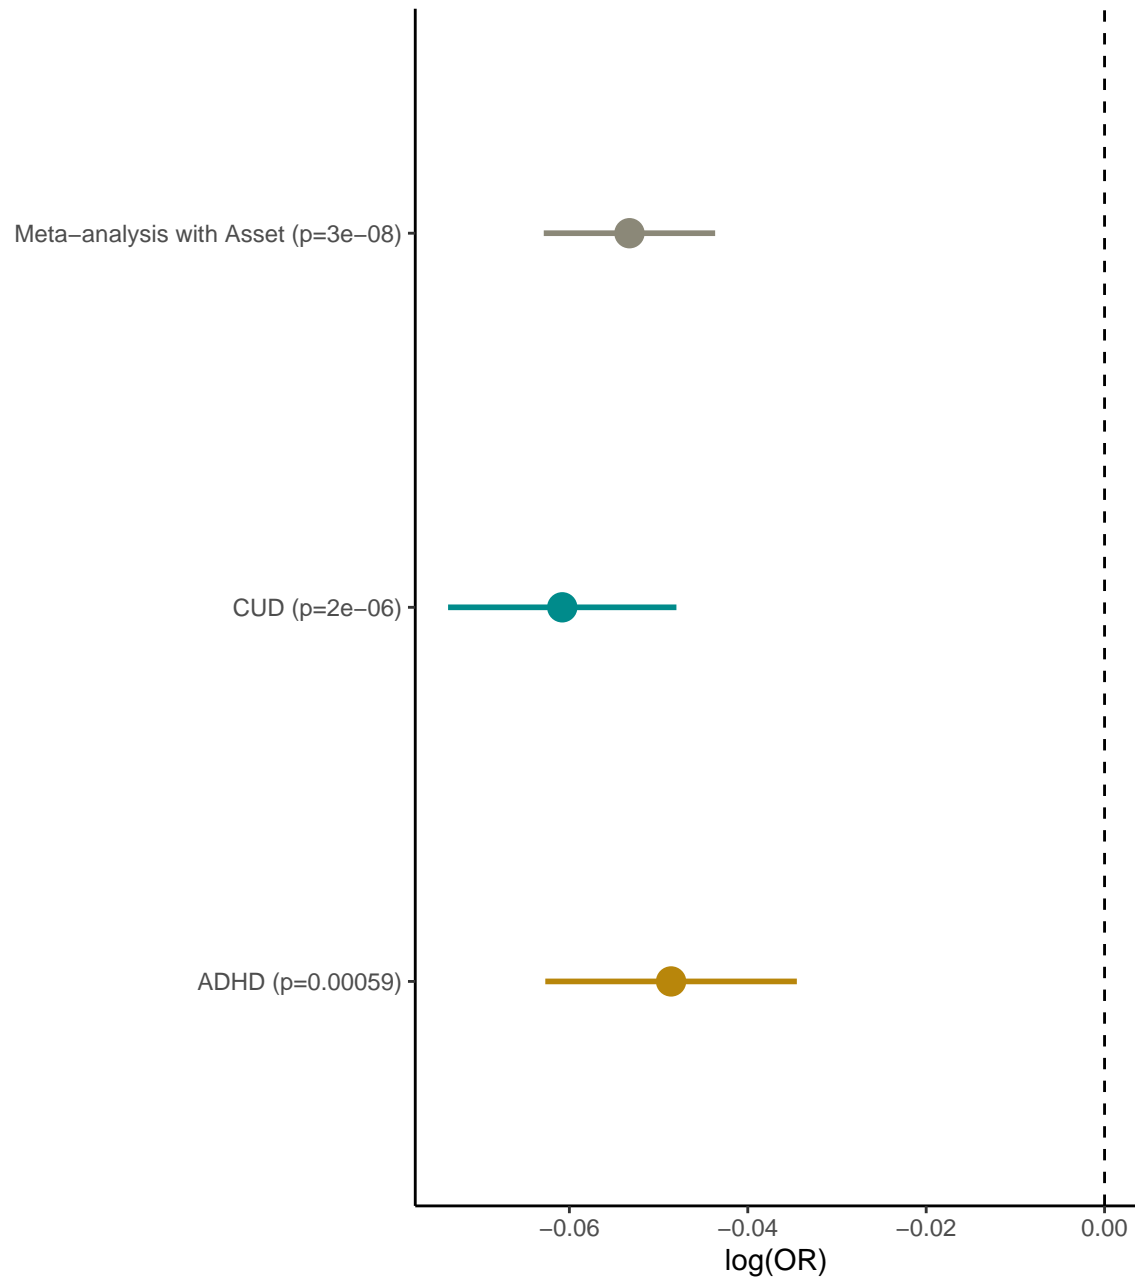

PM-Plot

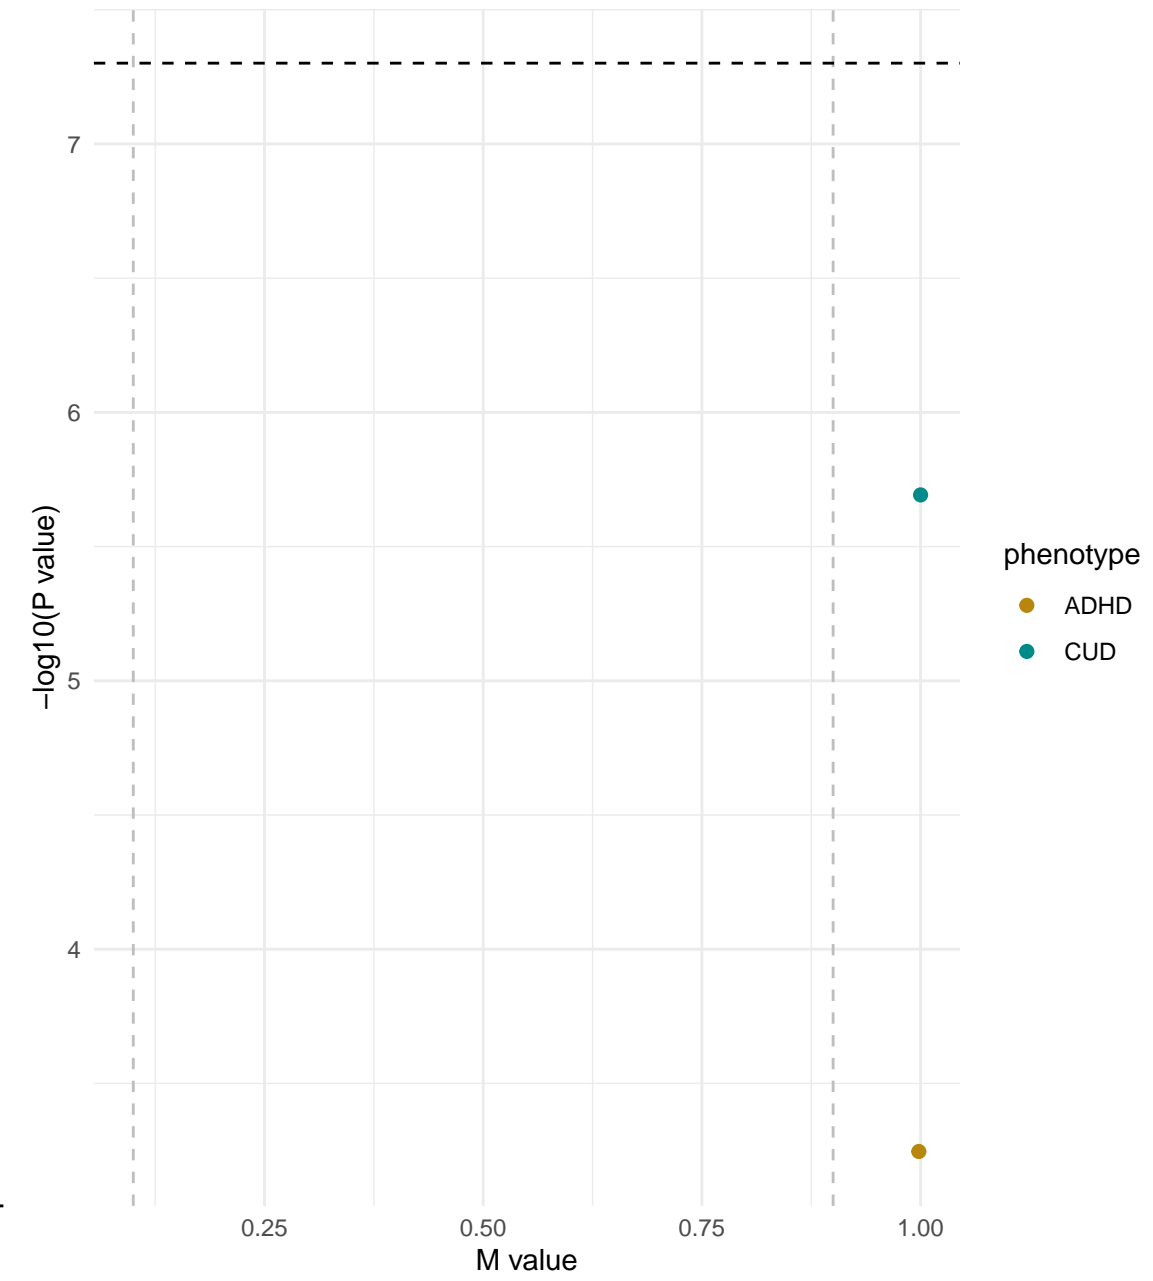

Lead SNP: rs73144681

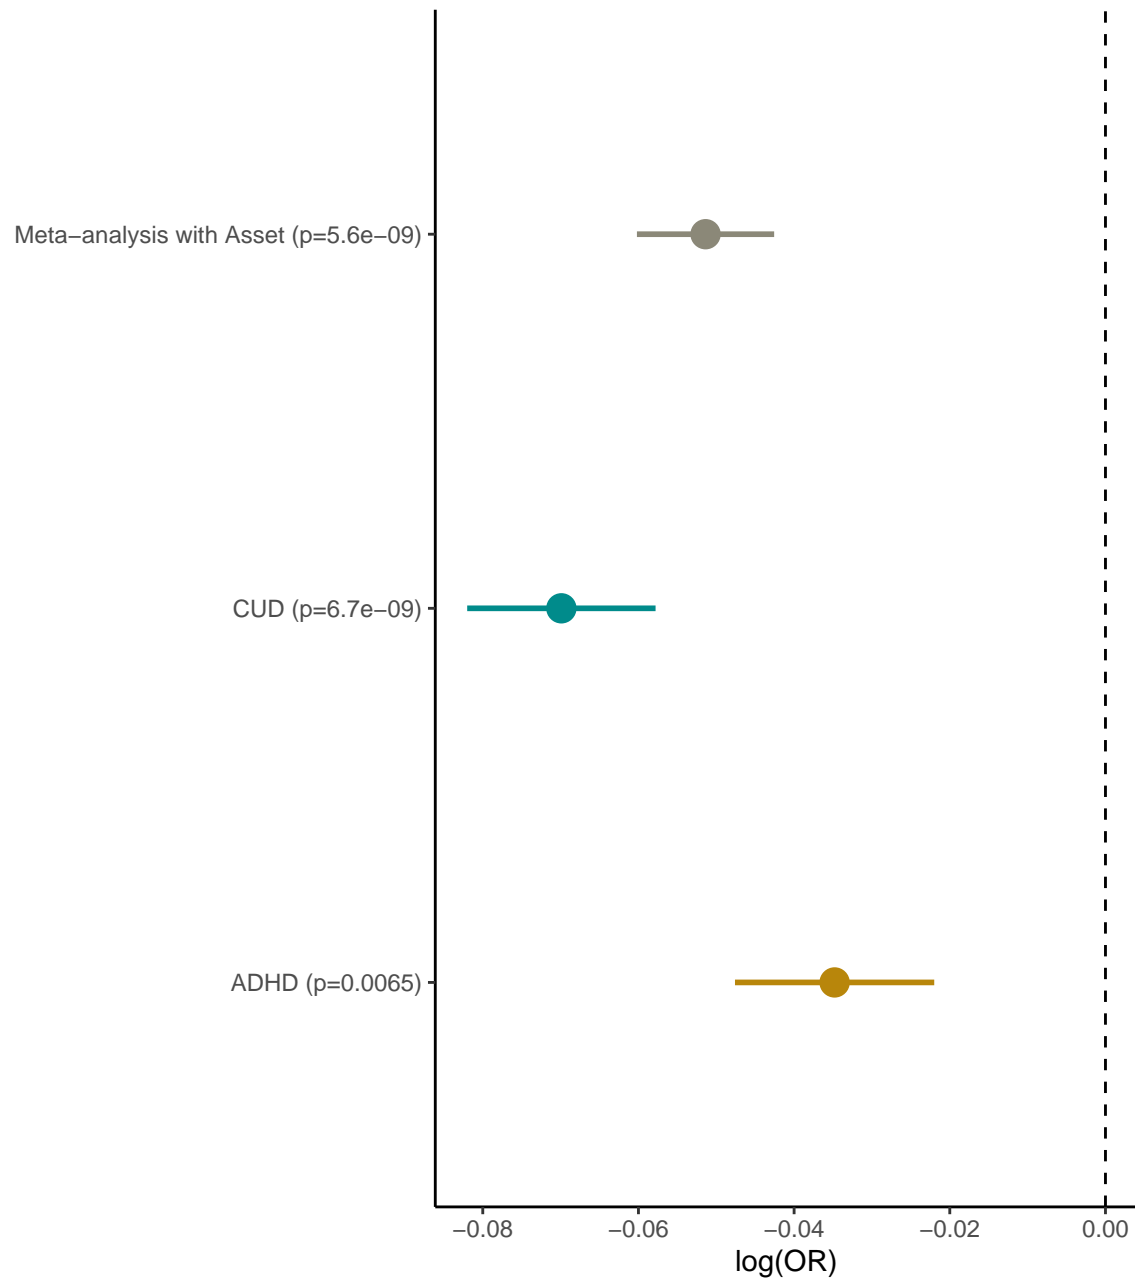

PM-Plot

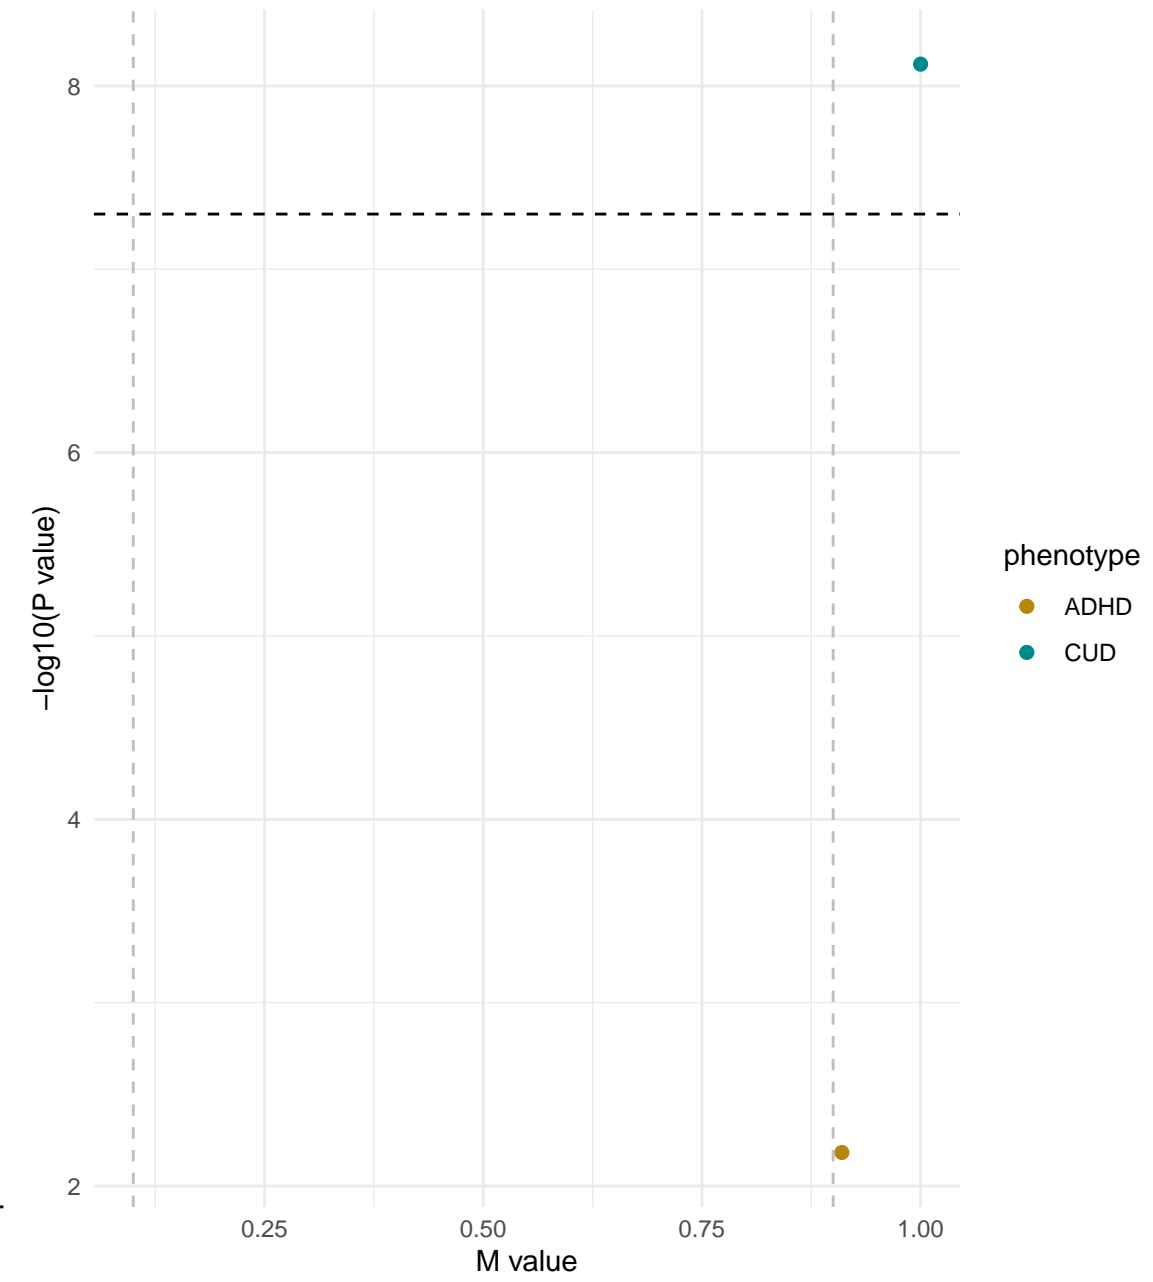

Lead SNP: rs75507005

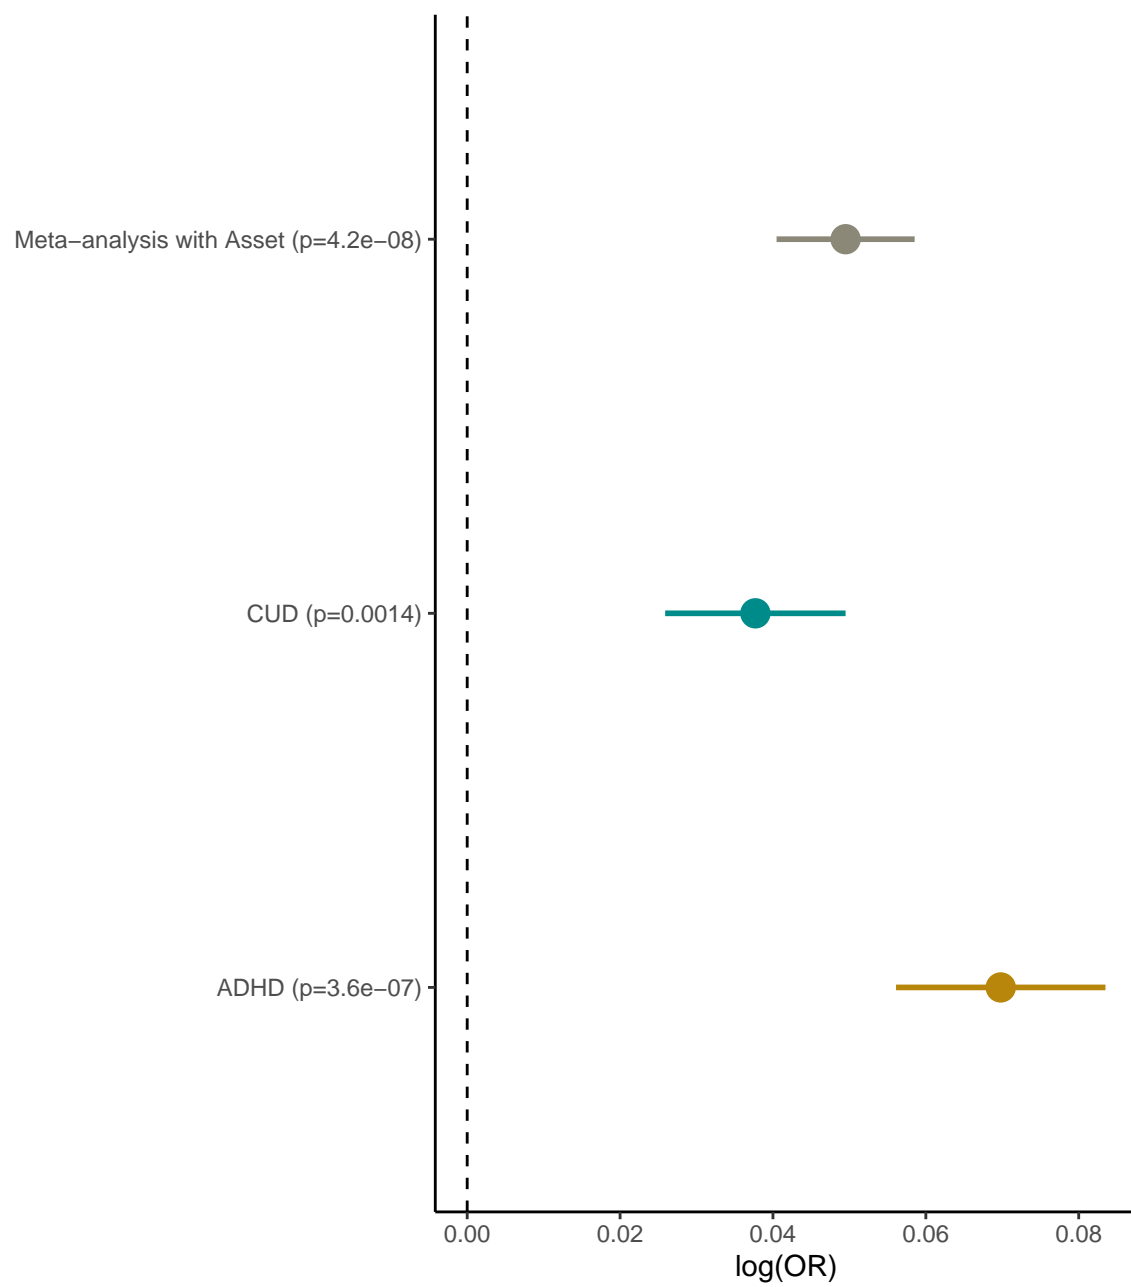

PM-Plot

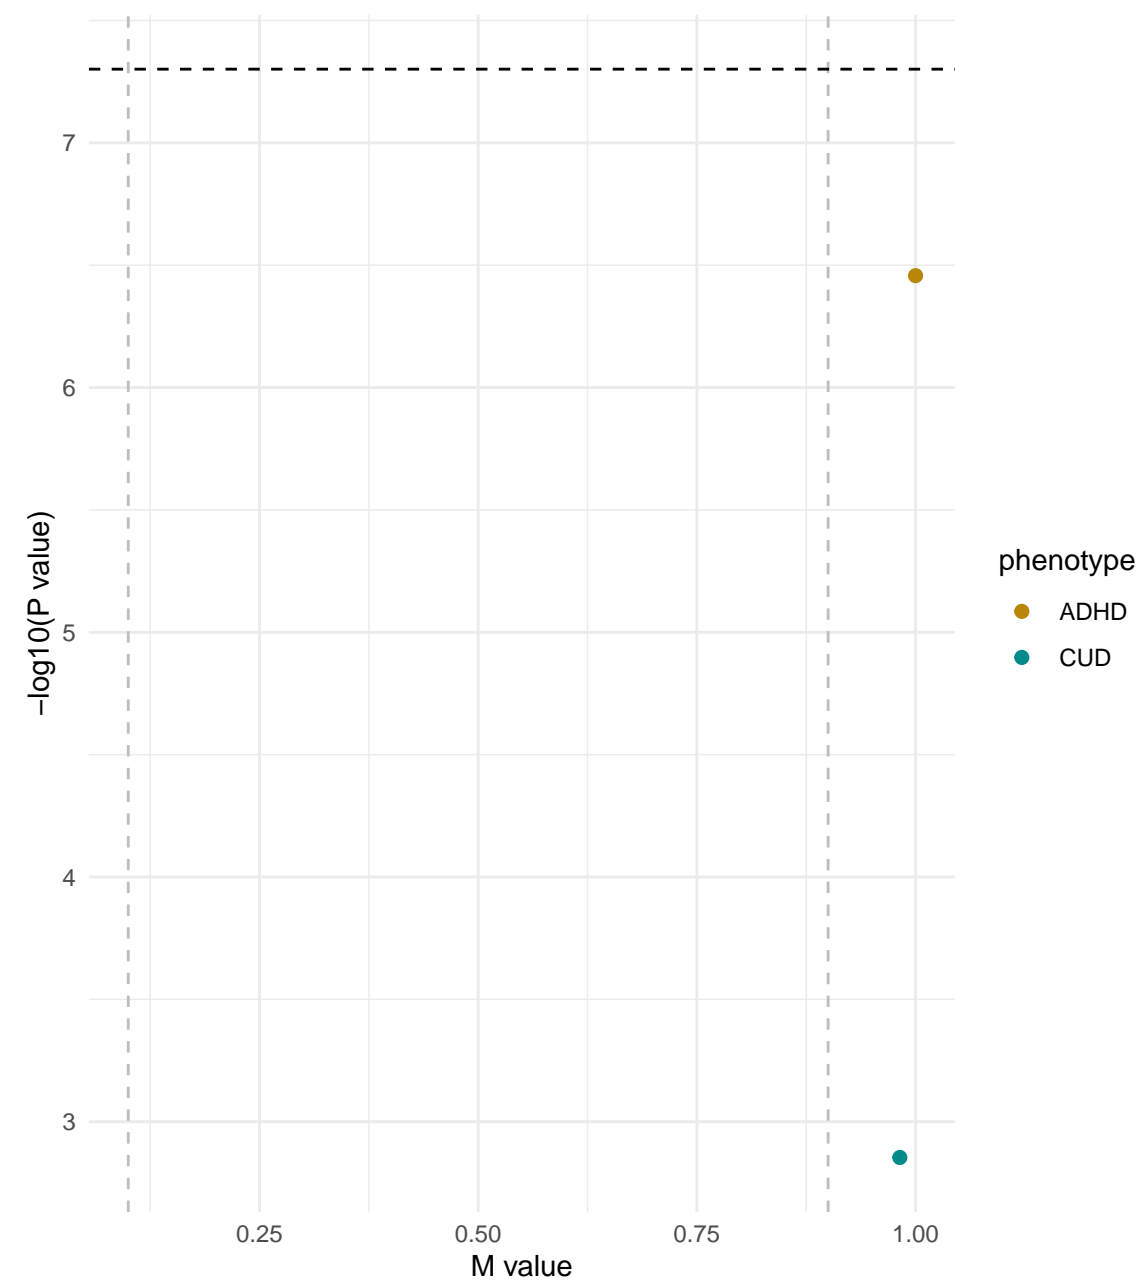

Supplement: Supplementary file [file media-2.pdf]
